# Supplementary material for: DEK::NUP214 acts as an XPO1-dependent transcriptional activator of essential leukemia genes
Source: Leukemia. 2025 Apr 9;39(6):1526–31. doi: 10.1038/s41375-025-02593-8 (PMC12133580; doi:10.1038/s41375-025-02593-8)
Supplement: Supplementary file 6 — Supplemental Table 6 [file 41375_2025_2593_MOESM6_ESM.xlsx]

## Sheet: t(6;9)-Selinexor
Ensembl gene id	Gene name	log2FoldChange	pvalue	padj
ENSG00000000419	DPM1	0.0366366	0.842566	0.919054
ENSG00000204682	CASC10	-6.14397	3.55677e-07	6.43893e-06
ENSG00000232682	AL592430.1	-6.03531	4.27872e-07	7.66669e-06
ENSG00000263513	FAM72C	-5.8438	1.57082e-06	2.43068e-05
ENSG00000154678	PDE1C	-5.76377	9.97217e-06	0.000126096
ENSG00000001036	FUCA2	0.103018	0.525703	0.719494
ENSG00000075043	KCNQ2	-5.52238	1.23727e-05	0.000150884
ENSG00000069188	SDK2	-5.2291	0.000143908	0.00130111
ENSG00000001460	STPG1	0.151952	0.622583	0.787746
ENSG00000072952	MRVI1	-4.77996	8.22647e-05	0.000798246
ENSG00000155016	CYP2U1	-4.71283	0.000470303	0.00357041
ENSG00000156575	PRG3	-4.65273	9.70048e-08	2.05653e-06
ENSG00000248668	OXCT1-AS1	-4.60638	8.56605e-05	0.000825104
ENSG00000261399	AL031710.1	-4.59066	1.01536e-05	0.000127956
ENSG00000073282	TP63	-4.15187	1.95021e-07	3.81998e-06
ENSG00000002016	RAD52	0.127696	0.637519	0.798571
ENSG00000111664	GNB3	-4.14358	7.86912e-07	1.32e-05
ENSG00000223764	AL645608.1	-4.10737	2.60884e-05	0.00029383
ENSG00000118113	MMP8	-4.08532	3.53296e-11	1.4935e-09
ENSG00000156509	FBXO43	-3.91982	0.000115392	0.00107155
ENSG00000280273	AF131216.4	-3.85458	0.000250141	0.00209021
ENSG00000002834	LASP1	-0.056506	0.652213	0.807459
ENSG00000225285	LINC01770	-3.84413	0.00623138	0.0307339
ENSG00000162595	DIRAS3	-3.82909	0.00912379	0.0418452
ENSG00000180592	SKIDA1	-3.79729	0.0016527	0.0103003
ENSG00000003096	KLHL13	-0.111119	0.819049	0.907706
ENSG00000163710	PCOLCE2	-3.78706	1.67778e-22	3.57502e-20
ENSG00000003249	DBNDD1	-0.214688	0.809711	0.902992
ENSG00000270885	RASL10B	-3.74525	0.00140296	0.00900361
ENSG00000116254	CHD5	-3.73366	6.41068e-07	1.09873e-05
ENSG00000069482	GAL	-3.71698	0.000160981	0.00143006
ENSG00000104490	NCALD	-3.7062	1.67842e-05	0.000198405
ENSG00000268658	LINC00664	-3.70597	0.00402389	0.0215592
ENSG00000182557	SPNS3	-3.69919	6.83198e-47	6.73292e-44
ENSG00000003987	MTMR7	0.122701	0.807392	0.901625
ENSG00000101955	SRPX	-3.675	2.68089e-08	6.43413e-07
ENSG00000196876	SCN8A	-3.67133	0.00644821	0.0315566
ENSG00000151150	ANK3	-3.66933	5.54176e-12	2.67225e-10
ENSG00000165757	JCAD	-3.66929	0.00733619	0.0349824
ENSG00000262823	AC127521.1	-3.63369	4.53606e-19	6.44366e-17
ENSG00000140451	PIF1	-3.60825	2.33527e-11	1.00884e-09
ENSG00000144130	NT5DC4	-3.60651	2.78648e-06	4.0948e-05
ENSG00000104611	SH2D4A	-3.60014	1.14515e-06	1.8369e-05
ENSG00000118193	KIF14	-3.56209	2.80698e-08	6.71342e-07
ENSG00000255308	AC009652.2	-3.52892	1.49447e-05	0.000179336
ENSG00000184260	HIST2H2AC	-3.51833	7.08955e-05	0.000700426
ENSG00000278831	AL513190.1	-3.4924	8.75042e-05	0.000839785
ENSG00000227028	SLC8A1-AS1	-3.42622	0.00698419	0.0336046
ENSG00000136931	NR5A1	-3.2584	0.00486669	0.0251682
ENSG00000130635	COL5A1	-3.20634	1.67015e-05	0.000197709
ENSG00000004838	ZMYND10	0.205394	0.779712	0.885129
ENSG00000117650	NEK2	-3.20578	3.46065e-05	0.00037452
ENSG00000211890	IGHA2	-3.20297	0.0953802	0.241374
ENSG00000259120	SMIM6	-3.17899	0.00331001	0.0184035
ENSG00000004961	HCCS	0.124226	0.555635	0.742041
ENSG00000105996	HOXA2	-3.1678	4.95806e-08	1.12649e-06
ENSG00000224277	AP000345.1	-3.1652	5.54675e-53	7.28843e-50
ENSG00000163362	INAVA	-3.15321	3.2243e-05	0.000352083
ENSG00000125780	TGM3	-3.14929	1.14977e-06	1.84056e-05
ENSG00000136231	IGF2BP3	-3.10613	0.00259452	0.0150572
ENSG00000168077	SCARA3	-3.09193	8.67709e-41	6.51628e-38
ENSG00000005075	POLR2J	0.084887	0.622008	0.787382
ENSG00000128322	IGLL1	-3.04521	1.0121e-57	1.77319e-54
ENSG00000131747	TOP2A	-3.03613	1.11829e-17	1.26858e-15
ENSG00000232499	AL391058.1	-3.02198	0.000410521	0.00318088
ENSG00000106006	HOXA6	-3.01301	1.16473e-06	1.86074e-05
ENSG00000005189	REXO5	-0.126152	0.533633	0.725123
ENSG00000174175	SELP	-2.97713	0.002614	0.0151424
ENSG00000079101	CLUL1	-2.96957	0.010018	0.0450552
ENSG00000256673	AC141557.1	-2.9585	0.000787226	0.00554398
ENSG00000111261	MANSC1	-2.94993	1.34069e-11	6.10984e-10
ENSG00000235499	AC073046.1	-2.9365	0.0209777	0.0796666
ENSG00000163888	CAMK2N2	-2.9281	0.0343503	0.115242
ENSG00000169679	BUB1	-2.92769	2.0305e-07	3.9625e-06
ENSG00000066279	ASPM	-2.92318	1.31302e-24	3.25888e-22
ENSG00000278719	MCM8-AS1	-2.92075	0.00603933	0.0299554
ENSG00000005436	GCFC2	0.0178241	0.950058	0.975978
ENSG00000101447	FAM83D	-2.91115	5.13441e-12	2.51427e-10
ENSG00000054598	FOXC1	-2.89655	2.2607e-52	2.74206e-49
ENSG00000234231	AC093616.1	-2.89493	0.0209018	0.0795253
ENSG00000215018	COL28A1	-2.87293	8.64533e-05	0.000831724
ENSG00000231864	AL807752.3	-2.86959	5.07586e-13	2.81818e-11
ENSG00000122966	CIT	-2.86164	4.40603e-19	6.31584e-17
ENSG00000187017	ESPN	-2.86041	0.00183365	0.0112153
ENSG00000120068	HOXB8	-2.8555	2.74642e-49	2.88703e-46
ENSG00000266466	AC233702.8	-2.85336	0.0161303	0.0650493
ENSG00000157456	CCNB2	-2.85026	1.99166e-09	6.08614e-08
ENSG00000117399	CDC20	-2.85022	4.73149e-38	3.39119e-35
ENSG00000005884	ITGA3	-0.367582	0.642674	0.802083
ENSG00000260442	ATP2A1-AS1	-2.84355	0.0129236	0.0550159
ENSG00000265366	GLUD1P2	-2.83514	0.0266515	0.0953807
ENSG00000137812	KNL1	-2.81639	3.10566e-15	2.44851e-13
ENSG00000006007	GDE1	-0.0353079	0.781447	0.885733
ENSG00000006015	REX1BD	0.0437658	0.81994	0.908113
ENSG00000283208	AC001226.2	-2.80735	0.0070436	0.0338505
ENSG00000006025	OSBPL7	-0.168373	0.515988	0.71338
ENSG00000006062	MAP3K14	0.128869	0.600631	0.773248
ENSG00000249310	APOBEC3B-AS1	-2.80559	1.4117e-14	9.93736e-13
ENSG00000175063	UBE2C	-2.79392	3.02492e-20	5.02072e-18
ENSG00000005249	PRKAR2B	-2.78803	5.3501e-16	4.63519e-14
ENSG00000129173	E2F8	-2.78318	5.56119e-26	1.60925e-23
ENSG00000006327	TNFRSF12A	0.0557964	0.820774	0.908551
ENSG00000006432	MAP3K9	-0.314251	0.52542	0.719378
ENSG00000182585	EPGN	-2.76649	1.17861e-05	0.000144625
ENSG00000130707	ASS1	-2.75152	4.14776e-05	0.000435624
ENSG00000120756	PLS1	-2.75142	1.7057e-06	2.60867e-05
ENSG00000127585	FBXL16	-2.74991	0.000174206	0.0015303
ENSG00000118200	CAMSAP2	-2.73845	0.0107071	0.0475307
ENSG00000135451	TROAP	-2.73041	3.94988e-15	3.06806e-13
ENSG00000151468	CCDC3	-2.72557	1.32273e-24	3.25888e-22
ENSG00000165633	VSTM4	-2.72258	6.64098e-06	8.73928e-05
ENSG00000112984	KIF20A	-2.71335	1.70155e-22	3.57734e-20
ENSG00000172985	SH3RF3	-2.69964	0.00307313	0.0172445
ENSG00000024526	DEPDC1	-2.67567	0.00101693	0.00683349
ENSG00000234996	AC098934.2	-2.67317	0.034368	0.115277
ENSG00000167281	RBFOX3	-2.67123	0.000367936	0.00289936
ENSG00000259113	AL118556.1	-2.66683	0.00607521	0.0301049
ENSG00000168280	KIF5C	-2.65351	0.0115675	0.0503857
ENSG00000253327	RAD21-AS1	-2.64839	0.00504411	0.0259242
ENSG00000138180	CEP55	-2.63107	4.0872e-29	1.49877e-26
ENSG00000224420	ADM5	-2.63051	0.0017285	0.0106757
ENSG00000219438	FAM19A5	-2.62507	0.0160778	0.064961
ENSG00000170689	HOXB9	-2.62453	2.33389e-58	4.60009e-55
ENSG00000169607	CKAP2L	-2.61802	5.70431e-20	9.17811e-18
ENSG00000144395	CCDC150	-2.61502	0.00126196	0.00820221
ENSG00000126787	DLGAP5	-2.60535	1.48759e-17	1.64031e-15
ENSG00000215784	FAM72D	-2.60322	0.000136343	0.00124197
ENSG00000007168	PAFAH1B1	-0.0509812	0.702164	0.837118
ENSG00000179240	AP002360.1	-2.60094	0.0445389	0.139345
ENSG00000093217	XYLB	-2.59249	0.0041635	0.0221791
ENSG00000007255	TRAPPC6A	0.0662044	0.682827	0.825043
ENSG00000110400	NECTIN1	-2.58746	2.69445e-16	2.41398e-14
ENSG00000007312	CD79B	0.0386503	0.892106	0.945281
ENSG00000278971	AC091305.2	-2.58472	0.0521951	0.156794
ENSG00000227473	TSSK5P	-2.57941	0.0236311	0.0875094
ENSG00000116761	CTH	-2.57933	0.020446	0.0782339
ENSG00000127588	GNG13	-2.56072	0.0107765	0.0477312
ENSG00000007392	LUC7L	0.0400385	0.872293	0.93462
ENSG00000007402	CACNA2D2	0.11736	0.886525	0.941872
ENSG00000117461	PIK3R3	-2.55823	0.00940414	0.0428816
ENSG00000275516	AC100791.3	-2.54699	0.0061031	0.0302242
ENSG00000007541	PIGQ	-0.0613103	0.705832	0.840222
ENSG00000007545	CRAMP1	-0.0800244	0.660899	0.813095
ENSG00000007866	TEAD3	-0.12379	0.801626	0.898536
ENSG00000144852	NR1I2	-2.53862	6.55453e-05	0.000652062
ENSG00000007944	MYLIP	0.0375365	0.878453	0.938059
ENSG00000229453	SPINK8	-2.52811	0.00604483	0.0299732
ENSG00000137225	CAPN11	-2.52426	0.0363167	0.119724
ENSG00000008018	PSMB1	-0.0265303	0.835679	0.915977
ENSG00000166444	ST5	-2.5029	0.0301026	0.104389
ENSG00000105971	CAV2	-2.49735	0.000626273	0.00455072
ENSG00000008086	CDKL5	-0.082585	0.87665	0.937154
ENSG00000170298	LGALS9B	-2.48903	0.0340629	0.114579
ENSG00000100290	BIK	-2.47608	1.85093e-12	9.47581e-11
ENSG00000268677	AC011495.3	-2.47399	0.0153582	0.0627379
ENSG00000008277	ADAM22	-0.0376904	0.94365	0.973075
ENSG00000008282	SYPL1	-0.0824313	0.543882	0.732235
ENSG00000179750	APOBEC3B	-2.47385	1.65655e-11	7.44173e-10
ENSG00000260500	AC010336.2	-2.47344	0.00506857	0.026016
ENSG00000115255	REEP6	-2.46482	6.04111e-05	0.000608639
ENSG00000156970	BUB1B	-2.45825	1.1837e-10	4.55233e-09
ENSG00000009950	MLXIPL	-2.45324	3.03343e-05	0.000334717
ENSG00000008394	MGST1	-0.0337259	0.784098	0.887429
ENSG00000109674	NEIL3	-2.4506	6.54821e-14	4.18025e-12
ENSG00000276131	AC009118.2	-2.44491	9.0656e-05	0.000866342
ENSG00000178150	ZNF114	-2.44479	0.00202286	0.0122068
ENSG00000232335	AL354864.1	-2.44293	0.000233049	0.00196404
ENSG00000105974	CAV1	-2.44056	0.0404766	0.129696
ENSG00000242445	RPL7AP11	-2.43941	0.0187084	0.0730182
ENSG00000008735	MAPK8IP2	0.554193	0.610781	0.779947
ENSG00000138778	CENPE	-2.42004	9.65221e-08	2.0546e-06
ENSG00000186185	KIF18B	-2.41726	6.36298e-18	7.54372e-16
ENSG00000148773	MKI67	-2.41242	3.17709e-10	1.11822e-08
ENSG00000008952	SEC62	0.0460156	0.765943	0.877324
ENSG00000188404	SELL	-2.38425	1.76107e-07	3.48202e-06
ENSG00000009307	CSDE1	0.0255021	0.84425	0.920236
ENSG00000268912	AC012313.5	-2.3828	0.00159762	0.0100354
ENSG00000261386	AC027682.4	-2.37893	0.0798044	0.21256
ENSG00000009724	MASP2	0.207062	0.682095	0.82491
ENSG00000009780	FAM76A	0.0819882	0.771619	0.880819
ENSG00000171084	FAM86JP	-2.37232	0.0220116	0.0827954
ENSG00000140323	DISP2	-2.36604	0.0744653	0.202828
ENSG00000102384	CENPI	-2.36182	3.77311e-07	6.79936e-06
ENSG00000072571	HMMR	-2.35771	1.88831e-15	1.52692e-13
ENSG00000265415	AC099850.3	-2.35303	6.08311e-08	1.36248e-06
ENSG00000167646	DNAAF3	-2.35302	0.044689	0.139619
ENSG00000134057	CCNB1	-2.35047	1.51033e-29	5.8085e-27
ENSG00000010165	METTL13	-0.0860517	0.555709	0.742041
ENSG00000010219	DYRK4	-0.131149	0.648019	0.805198
ENSG00000010244	ZNF207	0.0273216	0.824833	0.909953
ENSG00000171695	LKAAEAR1	-2.34349	8.21031e-07	1.36995e-05
ENSG00000115163	CENPA	-2.33495	6.22691e-13	3.39744e-11
ENSG00000178773	CPNE7	-2.3337	2.16478e-07	4.20373e-06
ENSG00000071539	TRIP13	-2.33078	3.57116e-15	2.78762e-13
ENSG00000260924	LINC01311	-2.32955	0.0636558	0.181309
ENSG00000065833	ME1	-2.32446	0.0845111	0.221299
ENSG00000134780	DAGLA	-2.31746	0.00137857	0.00887597
ENSG00000259843	AC007610.1	-2.31204	0.0172349	0.0684879
ENSG00000035499	DEPDC1B	-2.31079	1.21067e-14	8.59902e-13
ENSG00000169994	MYO7B	-2.2937	0.0112093	0.0492059
ENSG00000272894	AC004982.2	-2.29076	0.0372812	0.122265
ENSG00000010404	IDS	-0.0296482	0.836514	0.91622
ENSG00000138160	KIF11	-2.28539	5.05546e-27	1.56303e-24
ENSG00000256469	AP002383.3	-2.27924	0.0606512	0.174668
ENSG00000223528	AL359094.1	-2.26156	0.0467662	0.14442
ENSG00000090889	KIF4A	-2.26093	2.8178e-12	1.41952e-10
ENSG00000166851	PLK1	-2.25774	1.03683e-35	5.83882e-33
ENSG00000261222	AC064805.1	-2.25579	0.0331922	0.112433
ENSG00000180720	CHRM4	-2.2549	0.0308359	0.106231
ENSG00000097046	CDC7	-2.25481	6.38141e-14	4.10433e-12
ENSG00000102539	MLNR	-2.25408	0.0316855	0.108433
ENSG00000151917	BEND6	-2.25144	0.000552191	0.00409546
ENSG00000011028	MRC2	0.0614685	0.723199	0.85189
ENSG00000011114	BTBD7	0.0513778	0.775797	0.883233
ENSG00000121152	NCAPH	-2.25105	8.5823e-14	5.37007e-12
ENSG00000125810	CD93	-2.23934	0.000102404	0.000966309
ENSG00000117724	CENPF	-2.23252	3.39206e-20	5.57146e-18
ENSG00000186193	SAPCD2	-2.22701	1.9325e-17	2.07301e-15
ENSG00000186871	ERCC6L	-2.22676	3.48691e-06	4.98473e-05
ENSG00000124491	F13A1	-2.22482	0.00011756	0.00108976
ENSG00000259895	AC106820.2	-2.22313	0.130492	0.300247
ENSG00000181418	DDN	-2.22165	0.0263046	0.0945884
ENSG00000088325	TPX2	-2.21739	6.30961e-33	3.20935e-30
ENSG00000011332	DPF1	-0.0508262	0.956232	0.978511
ENSG00000184661	CDCA2	-2.21675	2.38776e-10	8.55687e-09
ENSG00000271989	AL139424.1	-2.21476	0.00408607	0.0218404
ENSG00000165480	SKA3	-2.21459	5.04187e-17	5.12905e-15
ENSG00000100526	CDKN3	-2.2119	1.04302e-13	6.44957e-12
ENSG00000011451	WIZ	-0.106954	0.500039	0.699859
ENSG00000170629	DPY19L2P2	-2.21158	1.54734e-05	0.000184837
ENSG00000154839	SKA1	-2.21036	1.89942e-14	1.30786e-12
ENSG00000089847	ANKRD24	-2.20884	0.0126232	0.0539429
ENSG00000196557	CACNA1H	-2.20459	5.2767e-09	1.46227e-07
ENSG00000092853	CLSPN	-2.20061	0.000164566	0.00145534
ENSG00000229257	AL807752.2	-2.19791	1.08377e-06	1.75339e-05
ENSG00000154548	SRSF12	-2.19772	0.0554353	0.16369
ENSG00000261266	AC008870.3	-2.19432	1.11827e-11	5.15583e-10
ENSG00000012061	ERCC1	0.0736704	0.601021	0.773498
ENSG00000205918	PDPK2P	-2.19022	0.0286661	0.10058
ENSG00000137825	ITPKA	-2.18852	0.00348059	0.0191828
ENSG00000123485	HJURP	-2.17188	8.36519e-22	1.69106e-19
ENSG00000125618	PAX8	-2.16954	0.0964732	0.243196
ENSG00000156011	PSD3	-2.16746	0.0155912	0.0634432
ENSG00000012660	ELOVL5	-0.0666415	0.66182	0.813881
ENSG00000012779	ALOX5	-0.147494	0.576488	0.75656
ENSG00000012817	KDM5D	0.0140204	0.942623	0.972549
ENSG00000186603	HPDL	-2.16447	4.95909e-05	0.000511078
ENSG00000198483	ANKRD35	-2.16337	2.33652e-09	7.09869e-08
ENSG00000153832	FBXO36	-2.1526	0.0275802	0.097859
ENSG00000274565	AC080038.1	-2.15037	0.0183339	0.0718613
ENSG00000139194	RBP5	-2.14964	0.028557	0.100264
ENSG00000172247	C1QTNF4	-2.14839	1.25312e-05	0.00015258
ENSG00000013306	SLC25A39	-0.0961658	0.542712	0.731283
ENSG00000280091	AC020895.2	-2.13557	7.08837e-09	1.91714e-07
ENSG00000212719	C17orf51	-2.13521	3.02265e-05	0.000333995
ENSG00000128805	ARHGAP22	-2.13076	8.0432e-12	3.78382e-10
ENSG00000163596	ICA1L	-2.12483	0.000844232	0.00586942
ENSG00000113396	SLC27A6	-2.12482	0.0550314	0.162771
ENSG00000158402	CDC25C	-2.11057	3.16956e-08	7.51542e-07
ENSG00000013523	ANGEL1	0.00420734	0.986105	0.993223
ENSG00000270021	AC026691.1	-2.10583	0.0197855	0.0762037
ENSG00000013563	DNASE1L1	-0.0963672	0.552231	0.738932
ENSG00000086506	HBQ1	-2.10349	0.055856	0.164411
ENSG00000228265	RALY-AS1	-2.10337	0.00394875	0.0212795
ENSG00000165695	AK8	-2.10072	0.0380515	0.124094
ENSG00000260920	AL031985.3	-2.10054	0.0153718	0.0627609
ENSG00000014123	UFL1	-0.117167	0.605812	0.776748
ENSG00000232969	AP001062.2	-2.09966	0.0751057	0.203903
ENSG00000205502	C2CD4B	-2.09572	0.00126709	0.0082322
ENSG00000197576	HOXA4	-2.09409	0.0634123	0.180746
ENSG00000163736	PPBP	-2.09058	0.0407114	0.130184
ENSG00000175449	RFESD	-2.08878	0.0140195	0.0586833
ENSG00000014824	SLC30A9	-0.0588835	0.702272	0.837183
ENSG00000014919	COX15	-0.0530614	0.723363	0.851956
ENSG00000176842	IRX5	-2.08003	0.0660218	0.185435
ENSG00000015153	YAF2	-0.0738637	0.746437	0.866064
ENSG00000154620	TMSB4Y	-2.0772	0.00118527	0.00777106
ENSG00000015285	WAS	-0.0674954	0.622685	0.787812
ENSG00000260807	AC009041.2	-2.07435	0.0874287	0.226851
ENSG00000144354	CDCA7	-2.06099	2.76602e-12	1.39791e-10
ENSG00000015532	XYLT2	-0.0357577	0.84035	0.917776
ENSG00000163808	KIF15	-2.06002	4.40731e-14	2.93226e-12
ENSG00000011426	ANLN	-2.05824	1.04287e-14	7.47454e-13
ENSG00000016864	GLT8D1	-0.0137815	0.924041	0.963579
ENSG00000230927	TMBIM7P	-2.05756	0.0303256	0.104863
ENSG00000075218	GTSE1	-2.05485	9.75591e-16	8.13922e-14
ENSG00000152760	TCTEX1D1	-2.05452	5.88557e-07	1.01758e-05
ENSG00000017797	RALBP1	0.0956597	0.519571	0.715385
ENSG00000198826	ARHGAP11A	-2.05441	8.86961e-24	2.0874e-21
ENSG00000167880	EVPL	-2.05312	6.76598e-06	8.8757e-05
ENSG00000233225	AC004987.2	-2.04849	0.0419625	0.133239
ENSG00000074047	GLI2	-2.04466	0.000141795	0.00128717
ENSG00000018610	CXorf56	0.118265	0.516977	0.713871
ENSG00000258334	AC125611.4	-2.04234	0.00245475	0.0143898
ENSG00000102445	RUBCNL	-2.03063	0.00505633	0.0259701
ENSG00000188610	FAM72B	-2.02992	8.56889e-06	0.000109582
ENSG00000179869	ABCA13	-2.0292	0.000160423	0.0014259
ENSG00000019582	CD74	-0.0174638	0.90545	0.951936
ENSG00000197540	GZMM	-2.02006	0.0150389	0.06185
ENSG00000177283	FZD8	-2.01739	0.0343997	0.115334
ENSG00000236320	SLFN14	-2.01643	0.00747206	0.0354557
ENSG00000272817	AL359198.1	-2.01567	0.0107751	0.0477312
ENSG00000020256	ZFP64	-0.179992	0.507147	0.70586
ENSG00000134690	CDCA8	-2.01339	6.08086e-17	6.11212e-15
ENSG00000221890	NPTXR	-2.01292	0.0921591	0.235636
ENSG00000020922	MRE11	-0.0186228	0.919283	0.960619
ENSG00000271303	SRXN1	-2.01253	0.0283603	0.0998182
ENSG00000089685	BIRC5	-2.01148	3.30902e-06	4.74333e-05
ENSG00000214796	AC098934.1	-2.00991	4.53588e-08	1.04259e-06
ENSG00000021762	OSBPL5	0.0545188	0.735031	0.858962
ENSG00000123080	CDKN2C	-2.00546	6.46829e-15	4.78835e-13
ENSG00000109805	NCAPG	-2.00382	2.53784e-11	1.08906e-09
ENSG00000022277	RTFDC1	-0.0554287	0.680437	0.82443
ENSG00000231304	SGO1-AS1	-1.99758	0.000324912	0.00260724
ENSG00000260727	SLC7A5P1	-1.99643	0.0619687	0.177691
ENSG00000112742	TTK	-1.99399	6.26967e-07	1.07808e-05
ENSG00000121297	TSHZ3	-1.98932	0.0499189	0.151719
ENSG00000023041	ZDHHC6	0.105936	0.517049	0.713908
ENSG00000005513	SOX8	-1.9882	0.0192067	0.0746006
ENSG00000239264	TXNDC5	-1.98307	5.9248e-06	7.91714e-05
ENSG00000228021	AL158835.1	-1.9801	0.0758435	0.205164
ENSG00000233589	AL138789.1	-1.97724	0.0718007	0.197171
ENSG00000140534	TICRR	-1.97635	1.63367e-11	7.38102e-10
ENSG00000023330	ALAS1	0.0654501	0.605745	0.776725
ENSG00000160606	TLCD1	-1.97601	0.00055481	0.00410652
ENSG00000114646	CSPG5	-1.9704	0.0596297	0.172332
ENSG00000111665	CDCA3	-1.96663	1.43034e-10	5.35714e-09
ENSG00000023608	SNAPC1	0.151604	0.666573	0.816288
ENSG00000229153	EPHA1-AS1	-1.96644	0.0110533	0.0486566
ENSG00000153904	DDAH1	-1.96547	0.000505463	0.00380255
ENSG00000161912	ADCY10P1	-1.96542	0.0100086	0.0450389
ENSG00000023892	DEF6	-0.0772302	0.613561	0.782041
ENSG00000083720	OXCT1	-1.96217	1.83175e-20	3.10571e-18
ENSG00000105289	TJP3	-1.96146	0.0681254	0.189813
ENSG00000118690	ARMC2	-1.96033	0.00766549	0.0362753
ENSG00000142731	PLK4	-1.9603	8.3624e-12	3.91271e-10
ENSG00000267374	AC016205.1	-1.95838	0.0237867	0.0878844
ENSG00000185875	THNSL1	-1.95074	0.00541165	0.0274024
ENSG00000080986	NDC80	-1.94903	1.57054e-07	3.14667e-06
ENSG00000025156	HSF2	0.169401	0.519301	0.715139
ENSG00000025293	PHF20	-0.0149172	0.925718	0.964435
ENSG00000184985	SORCS2	-1.9468	0.00305444	0.0171641
ENSG00000171790	SLFNL1	-1.94671	0.050596	0.153202
ENSG00000120318	ARAP3	-1.94022	0.0296121	0.103028
ENSG00000228065	LINC01515	-1.93852	0.023392	0.0868171
ENSG00000248671	ALG1L9P	-1.93616	0.0173722	0.0688945
ENSG00000143995	MEIS1	-1.93478	2.28907e-20	3.8398e-18
ENSG00000025800	KPNA6	-0.0268074	0.859415	0.927977
ENSG00000026025	VIM	0.0328734	0.800882	0.897918
ENSG00000026036	RTEL1-TNFRSF6B	-0.264369	0.72694	0.853883
ENSG00000077782	FGFR1	-1.92946	4.93554e-06	6.75072e-05
ENSG00000181544	FANCB	-1.92934	0.00312774	0.0175135
ENSG00000170312	CDK1	-1.92593	2.24714e-14	1.53389e-12
ENSG00000214357	NEURL1B	-1.92517	3.67625e-08	8.56236e-07
ENSG00000237649	KIFC1	-1.9228	1.06723e-15	8.81053e-14
ENSG00000224837	GCSHP5	-1.92275	0.0289012	0.101157
ENSG00000162373	BEND5	-1.92023	0.0214994	0.0813344
ENSG00000163520	FBLN2	-1.91891	0.0327288	0.111194
ENSG00000113966	ARL6	-1.91173	0.00052917	0.00395448
ENSG00000027847	B4GALT7	0.0388922	0.821193	0.908914
ENSG00000181773	GPR3	-1.90927	0.0156129	0.063515
ENSG00000259479	SORD2P	-1.90696	0.0629647	0.179828
ENSG00000151491	EPS8	-1.90433	0.017405	0.0689742
ENSG00000028203	VEZT	-0.0826937	0.664962	0.815265
ENSG00000197415	VEPH1	-1.89668	0.0187745	0.0732402
ENSG00000028310	BRD9	-0.0748343	0.638348	0.799354
ENSG00000028528	SNX1	-0.0574917	0.652858	0.807647
ENSG00000140511	HAPLN3	-1.89326	2.95751e-06	4.30833e-05
ENSG00000029153	ARNTL2	-0.0432526	0.845342	0.921045
ENSG00000142611	PRDM16	-1.89144	4.34021e-31	1.90101e-28
ENSG00000204044	SLC12A5-AS1	-1.89011	0.00104353	0.00697517
ENSG00000029534	ANK1	-0.076465	0.93151	0.967417
ENSG00000131187	F12	-1.89004	4.24818e-09	1.2157e-07
ENSG00000205084	TMEM231	-1.88613	0.00463459	0.0242061
ENSG00000029993	HMGB3	-0.0267578	0.838952	0.917188
ENSG00000266392	MIR4740	-1.88352	0.0225535	0.0845114
ENSG00000224429	LINC00539	-1.88339	0.000228752	0.00193196
ENSG00000183856	IQGAP3	-1.88276	7.96901e-08	1.74521e-06
ENSG00000255441	AC008750.2	-1.88205	0.00102991	0.00690166
ENSG00000150551	LYPD1	-1.88095	0.0592741	0.171693
ENSG00000031081	ARHGAP31	0.440909	0.669911	0.818468
ENSG00000031691	CENPQ	0.0073737	0.98061	0.990479
ENSG00000128833	MYO5C	-1.87655	1.10873e-05	0.000137874
ENSG00000279179	AL662907.2	-1.87377	0.0453614	0.141093
ENSG00000032219	ARID4A	-0.0017422	0.99367	0.997339
ENSG00000181938	GINS3	-1.87173	2.55286e-10	9.08657e-09
ENSG00000153064	BANK1	-1.87085	0.00527999	0.0268737
ENSG00000032742	IFT88	-0.100326	0.759916	0.873775
ENSG00000237991	RPL35P1	-1.86954	0.0560392	0.164867
ENSG00000261098	AP000766.1	-1.86694	0.0302124	0.104609
ENSG00000106004	HOXA5	-1.86408	4.9686e-09	1.38909e-07
ENSG00000183018	SPNS2	-1.86326	2.2901e-23	5.15861e-21
ENSG00000253445	AC027309.1	-1.85977	0.0144006	0.0598967
ENSG00000033178	UBA6	0.0740037	0.656799	0.810206
ENSG00000259004	LINC02285	-1.85944	0.00322044	0.0179561
ENSG00000143228	NUF2	-1.85395	1.45156e-09	4.52336e-08
ENSG00000273199	AP000692.2	-1.85099	0.104091	0.256295
ENSG00000160172	FAM86C2P	-1.84516	0.0353747	0.117429
ENSG00000260874	AC106820.5	-1.84318	8.37612e-07	1.39608e-05
ENSG00000135636	DYSF	-1.84282	2.47903e-37	1.56358e-34
ENSG00000253540	FAM86HP	-1.83853	0.0717262	0.197019
ENSG00000259006	AC092143.2	-1.83583	0.0458349	0.142157
ENSG00000034693	PEX3	-0.199769	0.573298	0.754016
ENSG00000107833	NPM3	-1.83259	4.91432e-21	8.70663e-19
ENSG00000255348	AP001775.2	-1.82423	0.0199882	0.076778
ENSG00000280400	AC127459.3	-1.82244	0.00216139	0.0129192
ENSG00000111206	FOXM1	-1.82198	2.09233e-27	6.59837e-25
ENSG00000268041	AC010616.1	-1.82176	0.0983378	0.245891
ENSG00000137804	NUSAP1	-1.82095	2.88829e-19	4.2169e-17
ENSG00000237737	DCTN1-AS1	-1.81245	0.000260281	0.00215701
ENSG00000164930	FZD6	-1.81055	0.00672892	0.0326065
ENSG00000168785	TSPAN5	-1.80951	0.00275345	0.0157641
ENSG00000233247	AC002524.1	-1.80856	0.0720945	0.197805
ENSG00000174837	ADGRE1	-1.80853	5.61318e-26	1.60925e-23
ENSG00000230730	AC074011.1	-1.80637	0.107628	0.262744
ENSG00000105409	ATP1A3	-1.80566	0.0174598	0.0691031
ENSG00000036448	MYOM2	-0.333859	0.668226	0.817362
ENSG00000143036	SLC44A3	-1.80478	0.0444455	0.139142
ENSG00000258725	PRC1-AS1	-1.8046	7.46699e-13	4.03217e-11
ENSG00000198901	PRC1	-1.80387	1.76505e-17	1.9194e-15
ENSG00000111247	RAD51AP1	-1.80309	9.3403e-10	3.03041e-08
ENSG00000273604	EPOP	-1.80308	4.57571e-07	8.14049e-06
ENSG00000176593	AC008969.1	-1.79727	0.0195722	0.0755113
ENSG00000037749	MFAP3	0.00269936	0.994363	0.997653
ENSG00000135476	ESPL1	-1.79607	5.74407e-10	1.93531e-08
ENSG00000111331	OAS3	-1.79265	8.47944e-05	0.000818762
ENSG00000038002	AGA	0.119049	0.560606	0.745725
ENSG00000165138	ANKS6	-1.78822	0.0141385	0.0590714
ENSG00000145386	CCNA2	-1.78795	9.13927e-24	2.11924e-21
ENSG00000196550	FAM72A	-1.78482	0.001893	0.0115469
ENSG00000163803	PLB1	-1.77845	3.53976e-09	1.03745e-07
ENSG00000124107	SLPI	-1.77684	2.71908e-13	1.56476e-11
ENSG00000099139	PCSK5	-1.7716	0.0513567	0.154955
ENSG00000273014	AC018645.2	-1.77039	0.0041658	0.0221838
ENSG00000260657	AC107871.2	-1.76728	0.0726112	0.198981
ENSG00000076382	SPAG5	-1.76687	2.36572e-09	7.17359e-08
ENSG00000197905	TEAD4	-1.75666	0.00397656	0.0213855
ENSG00000154760	SLFN13	-1.74498	6.88284e-08	1.52008e-06
ENSG00000272142	AL359643.3	-1.74367	0.0512862	0.154772
ENSG00000101096	NFATC2	-1.74317	2.8585e-09	8.55271e-08
ENSG00000136492	BRIP1	-1.74062	1.35772e-06	2.13233e-05
ENSG00000156398	SFXN2	-1.73293	2.48494e-10	8.88494e-09
ENSG00000104381	GDAP1	-1.73262	1.9796e-06	2.98416e-05
ENSG00000123965	PMS2P5	-1.73179	0.0842268	0.220741
ENSG00000040933	INPP4A	0.094432	0.586095	0.763464
ENSG00000151929	BAG3	-1.72475	0.0179665	0.070718
ENSG00000113790	EHHADH	-1.72165	0.00296171	0.0167804
ENSG00000143850	PLEKHA6	-1.71971	0.0364849	0.120178
ENSG00000251018	HMMR-AS1	-1.71906	0.00425602	0.0225728
ENSG00000041988	THAP3	0.0696805	0.692002	0.831048
ENSG00000144158	AL078621.1	-1.71699	0.000250076	0.00209021
ENSG00000162063	CCNF	-1.71271	1.9326e-17	2.07301e-15
ENSG00000278200	LINC01971	-1.70708	0.048869	0.149271
ENSG00000136014	USP44	-1.70673	0.0098216	0.0443745
ENSG00000122952	ZWINT	-1.70661	1.7158e-17	1.8788e-15
ENSG00000272841	AL139393.2	-1.7048	0.0806498	0.213981
ENSG00000042753	AP2S1	0.0112663	0.94948	0.975653
ENSG00000164045	CDC25A	-1.70474	1.75324e-12	9.03437e-11
ENSG00000139734	DIAPH3	-1.70377	1.08623e-07	2.25661e-06
ENSG00000043143	JADE2	-0.0705681	0.660551	0.812891
ENSG00000176912	TYMSOS	-1.70314	4.28513e-14	2.87523e-12
ENSG00000205702	CYP2D7	-1.70166	0.132541	0.303325
ENSG00000092470	WDR76	-1.69284	2.41743e-06	3.59943e-05
ENSG00000164251	F2RL1	-1.68538	0.00954259	0.0433499
ENSG00000238035	AC138035.1	-1.67985	0.163419	0.34765
ENSG00000260659	AC009113.2	-1.67444	0.0288637	0.101071
ENSG00000237489	C10orf143	-1.66302	0.000676763	0.00486603
ENSG00000005381	MPO	-1.66224	3.37675e-23	7.49923e-21
ENSG00000046647	GEMIN8	0.0683532	0.78752	0.88945
ENSG00000171320	ESCO2	-1.66217	2.45154e-07	4.69213e-06
ENSG00000142945	KIF2C	-1.65853	5.18905e-12	2.53316e-10
ENSG00000186564	FOXD2	-1.65745	0.0110073	0.0485084
ENSG00000047230	CTPS2	-0.145507	0.518591	0.714973
ENSG00000257829	AC121757.1	-1.65645	0.22324	0.427199
ENSG00000178695	KCTD12	-1.64834	5.25697e-06	7.13969e-05
ENSG00000173933	RBM4	-1.64683	0.000191168	0.00166079
ENSG00000137807	KIF23	-1.64551	4.0597e-15	3.13791e-13
ENSG00000047410	TPR	-0.075568	0.689557	0.829465
ENSG00000250635	CXXC5-AS1	-1.64306	0.00740475	0.0352212
ENSG00000204380	PKP4-AS1	-1.64241	0.00332379	0.0184671
ENSG00000143476	DTL	-1.64239	5.49247e-14	3.59358e-12
ENSG00000047621	C12orf4	-0.0969807	0.690943	0.830306
ENSG00000146410	MTFR2	-1.64171	1.61698e-05	0.000192426
ENSG00000178999	AURKB	-1.64166	0.000468525	0.00356205
ENSG00000152056	AP1S3	-1.63806	0.000346199	0.00275561
ENSG00000047849	MAP4	0.0758588	0.591978	0.767176
ENSG00000152253	SPC25	-1.63728	1.37271e-05	0.000165734
ENSG00000100206	DMC1	-1.63463	0.0176072	0.0695117
ENSG00000155961	RAB39B	-1.63204	0.0588852	0.170932
ENSG00000254343	AC091563.1	-1.62569	0.0596653	0.17237
ENSG00000119326	CTNNAL1	-1.62455	1.08253e-11	5.00568e-10
ENSG00000164591	MYOZ3	-1.62246	0.00787908	0.0370672
ENSG00000183918	SH2D1A	-1.62055	5.51256e-12	2.66632e-10
ENSG00000123570	RAB9B	-1.61803	0.00815037	0.0380335
ENSG00000258674	AC011448.1	-1.61781	0.155876	0.338046
ENSG00000166483	WEE1	-1.61734	5.74113e-16	4.9199e-14
ENSG00000048649	RSF1	0.0741423	0.672147	0.81982
ENSG00000048707	VPS13D	0.0404411	0.825429	0.910229
ENSG00000213846	AC098614.1	-1.61637	0.0649962	0.183801
ENSG00000101057	MYBL2	-1.61305	2.26018e-05	0.000259001
ENSG00000254369	HOXA-AS3	-1.61023	1.09478e-12	5.75418e-11
ENSG00000278023	RDM1	-1.60855	0.0689739	0.19154
ENSG00000089472	HEPH	-1.60826	0.254393	0.465398
ENSG00000049167	ERCC8	-0.0434	0.899198	0.948817
ENSG00000232093	DCST1-AS1	-1.60697	0.0734286	0.200837
ENSG00000165462	PHOX2A	-1.60637	0.160734	0.344401
ENSG00000256512	AC009511.1	-1.60544	0.108274	0.26383
ENSG00000049247	UTS2	-0.10039	0.802564	0.898985
ENSG00000049249	TNFRSF9	0.433146	0.514232	0.711732
ENSG00000167900	TK1	-1.60506	9.31507e-06	0.000118547
ENSG00000049449	RCN1	-0.0134176	0.943298	0.972902
ENSG00000049540	ELN	0.664515	0.556439	0.742352
ENSG00000123213	NLN	-1.60308	5.78932e-13	3.19182e-11
ENSG00000173588	CEP83	-1.60289	5.42108e-07	9.51889e-06
ENSG00000267291	AC008649.1	-1.60093	8.20755e-06	0.000105302
ENSG00000100162	CENPM	-1.59961	0.000494922	0.00373572
ENSG00000049768	FOXP3	0.206909	0.553582	0.740238
ENSG00000049769	PPP1R3F	0.101827	0.774235	0.882189
ENSG00000162512	SDC3	-1.59885	0.20061	0.399019
ENSG00000146670	CDCA5	-1.59683	3.92297e-13	2.19353e-11
ENSG00000050130	JKAMP	-0.0467814	0.777522	0.883537
ENSG00000050327	ARHGEF5	0.0106374	0.970395	0.98583
ENSG00000121653	MAPK8IP1	-1.59469	0.0400922	0.128936
ENSG00000187391	MAGI2	-1.59414	0.169214	0.355901
ENSG00000131153	GINS2	-1.59158	1.02812e-09	3.29498e-08
ENSG00000186523	FAM86B1	-1.58974	0.239776	0.447801
ENSG00000171241	SHCBP1	-1.58936	1.24789e-10	4.74136e-09
ENSG00000129810	SGO1	-1.58933	2.05806e-07	4.00635e-06
ENSG00000077152	UBE2T	-1.58832	5.09267e-06	6.94647e-05
ENSG00000176890	TYMS	-1.58831	8.36505e-16	7.05348e-14
ENSG00000187193	MT1X	-1.58545	0.082963	0.218524
ENSG00000164520	RAET1E	-1.58172	0.176886	0.3668
ENSG00000068489	PRR11	-1.5809	1.05982e-12	5.58907e-11
ENSG00000104974	LILRA1	-1.57936	0.0155786	0.0634083
ENSG00000257167	TMPO-AS1	-1.57932	1.6833e-10	6.21598e-09
ENSG00000051382	PIK3CB	0.0623501	0.692407	0.831232
ENSG00000170442	KRT86	-1.57498	0.0256659	0.0929668
ENSG00000254006	AC104232.1	-1.57449	3.86847e-06	5.47067e-05
ENSG00000051180	RAD51	-1.57402	1.73232e-06	2.64683e-05
ENSG00000273891	AL731566.1	-1.57258	0.00175539	0.0107995
ENSG00000141753	IGFBP4	-1.57216	0.121528	0.285411
ENSG00000095637	SORBS1	-1.57191	0.0266244	0.0953309
ENSG00000110063	DCPS	-1.56862	7.68852e-17	7.52997e-15
ENSG00000261519	AC010542.4	-1.56638	0.0192179	0.0746006
ENSG00000093009	CDC45	-1.56291	5.19251e-07	9.15858e-06
ENSG00000276805	AL133216.2	-1.56229	0.00241186	0.0141851
ENSG00000065485	PDIA5	-1.56112	6.9271e-16	5.90414e-14
ENSG00000167964	RAB26	-1.5602	0.0283148	0.0997469
ENSG00000139354	GAS2L3	-1.55835	0.0161189	0.06502
ENSG00000183780	SLC35F3	-1.55674	0.0137697	0.0578834
ENSG00000173320	STOX2	-1.5566	0.005457	0.0276143
ENSG00000053702	NRIP2	0.37271	0.61421	0.782551
ENSG00000053770	AP5M1	-0.0387912	0.840195	0.917776
ENSG00000053900	ANAPC4	-0.102287	0.628001	0.791742
ENSG00000205639	MFSD2B	-1.55624	0.112046	0.270062
ENSG00000165490	DDIAS	-1.5549	2.54133e-07	4.83958e-06
ENSG00000229344	MTCO2P12	-1.55447	0.185985	0.379542
ENSG00000164109	MAD2L1	-1.55181	4.7291e-12	2.32301e-10
ENSG00000054219	LY75	-0.142637	0.672161	0.81982
ENSG00000275197	AC092794.2	-1.55023	0.0422403	0.133959
ENSG00000110076	NRXN2	-1.55015	2.31903e-10	8.32948e-09
ENSG00000054282	SDCCAG8	-0.0720363	0.698699	0.835345
ENSG00000137563	GGH	-1.54917	1.07378e-14	7.66129e-13
ENSG00000051341	POLQ	-1.54898	1.13275e-06	1.82071e-05
ENSG00000165244	ZNF367	-1.5478	1.06242e-06	1.72349e-05
ENSG00000054611	TBC1D22A	0.0485157	0.732181	0.856965
ENSG00000054690	PLEKHH1	-0.209949	0.651358	0.807101
ENSG00000182397	DNM1P46	-1.54724	0.0923533	0.236017
ENSG00000054965	FAM168A	-0.104756	0.567881	0.750404
ENSG00000274290	HIST1H2BE	-1.54608	0.103638	0.255457
ENSG00000138207	RBP4	-1.54268	0.0488765	0.149271
ENSG00000176273	SLC35G1	-1.54161	0.0297273	0.103315
ENSG00000166813	KIF7	-1.54081	0.0115357	0.0502748
ENSG00000107821	KAZALD1	-1.53555	0.120572	0.283619
ENSG00000275632	AL035461.2	-1.53489	0.108447	0.26405
ENSG00000055147	FAM114A2	-0.0526036	0.802435	0.898955
ENSG00000127423	AUNIP	-1.53463	1.72483e-05	0.000202661
ENSG00000055208	TAB2	0.0530057	0.759253	0.873583
ENSG00000092621	PHGDH	-1.534	3.7266e-05	0.000396765
ENSG00000055332	EIF2AK2	0.0714598	0.724282	0.852465
ENSG00000271971	AC120053.1	-1.53334	0.070141	0.19393
ENSG00000055609	KMT2C	-0.0554149	0.760321	0.873815
ENSG00000276570	AC010327.5	-1.53196	0.0982769	0.245891
ENSG00000244040	IL12A-AS1	-1.53136	7.72799e-07	1.29909e-05
ENSG00000267577	AC010327.3	-1.53066	0.0319438	0.109118
ENSG00000260617	AC138028.5	-1.52819	0.0574486	0.167905
ENSG00000282608	ADORA3	-1.52652	0.0673918	0.188243
ENSG00000258839	MC1R	-1.52483	0.131587	0.302062
ENSG00000180264	ADGRD2	-1.52363	0.0314209	0.107846
ENSG00000186889	TMEM17	-1.5202	0.06395	0.181851
ENSG00000073598	FNDC8	-1.51994	0.0454604	0.141258
ENSG00000115596	WNT6	-1.5188	0.119813	0.282647
ENSG00000171793	CTPS1	-1.51793	6.60967e-12	3.13919e-10
ENSG00000233830	EIF4HP1	-1.51698	0.00278048	0.0158907
ENSG00000227268	KLLN	-1.51694	0.0441073	0.13835
ENSG00000152939	MARVELD2	-1.51436	0.026337	0.0946619
ENSG00000136824	SMC2	-1.51296	6.04729e-14	3.90794e-12
ENSG00000259802	AC012640.2	-1.51232	0.131671	0.302167
ENSG00000228384	AC007040.1	-1.50869	0.0332921	0.112606
ENSG00000146858	ZC3HAV1L	-1.50745	0.00181486	0.0111133
ENSG00000058063	ATP11B	0.0406121	0.818023	0.907486
ENSG00000073111	MCM2	-1.50736	1.97865e-21	3.75896e-19
ENSG00000058262	SEC61A1	-0.0258569	0.831348	0.913689
ENSG00000182481	KPNA2	-1.50614	2.63677e-16	2.37581e-14
ENSG00000164825	DEFB1	-1.50451	0.0205886	0.0786438
ENSG00000231871	IPO9-AS1	-1.50377	0.000824943	0.00576327
ENSG00000058668	ATP2B4	-0.0622806	0.693412	0.831715
ENSG00000058729	RIOK2	0.0126638	0.957879	0.979699
ENSG00000162745	OLFML2B	-1.50358	0.00195671	0.011853
ENSG00000237768	AL731563.2	-1.50284	0.0137039	0.0576835
ENSG00000279930	AL032819.2	-1.50088	0.0581919	0.16934
ENSG00000131634	TMEM204	-1.49959	0.00080633	0.00565579
ENSG00000059145	UNKL	0.0487998	0.752336	0.869822
ENSG00000280634	THRIL	-1.49577	1.18439e-05	0.000145109
ENSG00000227630	LINC01132	-1.4939	0.00478655	0.0248352
ENSG00000152953	STK32B	-1.49242	1.50023e-07	3.02889e-06
ENSG00000200087	SNORA73B	-1.49059	0.0313733	0.107777
ENSG00000122592	HOXA7	-1.49054	6.33118e-15	4.70897e-13
ENSG00000167513	CDT1	-1.48954	2.20821e-15	1.77648e-13
ENSG00000105011	ASF1B	-1.4894	6.45086e-10	2.15502e-08
ENSG00000059769	DNAJC25	-0.226362	0.551444	0.738318
ENSG00000161888	SPC24	-1.48765	1.53463e-13	9.23588e-12
ENSG00000059915	PSD	0.133298	0.691301	0.830509
ENSG00000129028	THAP10	-1.48697	0.0173291	0.0687929
ENSG00000107719	PALD1	-1.48445	0.0292401	0.102026
ENSG00000152642	GPD1L	-1.48325	1.37862e-08	3.51749e-07
ENSG00000060339	CCAR1	-0.00836444	0.954	0.97769
ENSG00000169992	NLGN2	-1.48266	0.00069221	0.00496577
ENSG00000060558	GNA15	0.0330928	0.775293	0.882936
ENSG00000060642	PIGV	-0.121823	0.583176	0.761408
ENSG00000155846	PPARGC1B	-1.48159	8.09479e-06	0.00010394
ENSG00000259498	TPM1-AS	-1.48032	0.0871317	0.226267
ENSG00000146592	CREB5	-1.47998	0.00968927	0.0438971
ENSG00000256663	AC112777.1	-1.47891	0.00054728	0.00406094
ENSG00000255478	AP000944.1	-1.47881	0.167916	0.354113
ENSG00000128641	MYO1B	-1.47818	0.0284509	0.10007
ENSG00000008441	NFIX	-1.47509	7.54702e-36	4.40746e-33
ENSG00000172572	PDE3A	-1.47301	0.0296259	0.103046
ENSG00000061656	SPAG4	-0.355379	0.579399	0.758666
ENSG00000248710	AC079594.2	-1.47235	4.46767e-06	6.17408e-05
ENSG00000104738	MCM4	-1.47127	8.41933e-18	9.83377e-16
ENSG00000061936	SFSWAP	0.0890342	0.650706	0.806946
ENSG00000187951	ARHGAP11B	-1.4702	4.54435e-09	1.28645e-07
ENSG00000112029	FBXO5	-1.46952	7.93706e-09	2.12481e-07
ENSG00000272836	AL022328.1	-1.46907	0.211763	0.412914
ENSG00000136531	SCN2A	-1.46901	0.156938	0.339451
ENSG00000150456	EEF1AKMT1	-1.46669	0.000129183	0.00118497
ENSG00000158089	GALNT14	-1.4655	1.08254e-05	0.000134936
ENSG00000126500	FLRT1	-1.46507	0.291193	0.507015
ENSG00000180044	C3orf80	-1.4645	6.32824e-11	2.55201e-09
ENSG00000273783	AL136040.2	-1.46422	0.235849	0.44346
ENSG00000169282	KCNAB1	-1.46416	0.145274	0.322722
ENSG00000058866	DGKG	-1.46376	8.4329e-08	1.83154e-06
ENSG00000183690	EFHC2	-1.46374	0.022839	0.0853781
ENSG00000178202	KDELC2	-1.45978	3.64498e-10	1.25845e-08
ENSG00000280355	AL132656.4	-1.45737	0.0393511	0.127097
ENSG00000226396	AL031727.1	-1.45528	0.159658	0.342888
ENSG00000253785	AC008429.2	-1.45521	0.0307598	0.106015
ENSG00000274605	AL355338.1	-1.45513	0.0202726	0.0777191
ENSG00000279583	AC009086.3	-1.45432	0.217288	0.419217
ENSG00000260001	TGFBR3L	-1.45415	0.00297319	0.0168133
ENSG00000063245	EPN1	0.0639037	0.61294	0.781485
ENSG00000265168	AC005726.5	-1.45409	0.000164393	0.00145534
ENSG00000106327	TFR2	-1.45339	0.0020892	0.0125448
ENSG00000063587	ZNF275	0.0626611	0.788784	0.890176
ENSG00000197299	BLM	-1.45259	5.07827e-10	1.71833e-08
ENSG00000160883	HK3	-1.45256	1.44445e-09	4.51905e-08
ENSG00000063761	ADCK1	-0.037528	0.890888	0.944562
ENSG00000063854	HAGH	0.0253352	0.877947	0.937777
ENSG00000120645	IQSEC3	-1.45112	0.0175611	0.069382
ENSG00000196793	ZNF239	-1.44919	0.122055	0.28635
ENSG00000064102	INTS13	-0.0537972	0.760318	0.873815
ENSG00000113368	LMNB1	-1.44908	2.5692e-21	4.7106e-19
ENSG00000177133	LINC00982	-1.44898	1.77239e-07	3.49775e-06
ENSG00000064201	TSPAN32	0.0459271	0.838619	0.917141
ENSG00000273148	AL035563.1	-1.44835	0.230584	0.436791
ENSG00000186529	CYP4F3	-1.44717	0.0100212	0.0450567
ENSG00000115107	STEAP3	-1.44601	2.00873e-13	1.18185e-11
ENSG00000232125	DYTN	-1.44597	0.214208	0.415555
ENSG00000091651	ORC6	-1.44286	1.37039e-05	0.000165581
ENSG00000064490	RFXANK	0.00835462	0.958473	0.979786
ENSG00000062282	DGAT2	-1.44147	0.0359932	0.118881
ENSG00000119969	HELLS	-1.441	2.09383e-08	5.15062e-07
ENSG00000173597	SULT1B1	-1.43964	0.0154172	0.0629136
ENSG00000064607	SUGP2	-0.0862831	0.711796	0.844162
ENSG00000184616	SPDYE12P	-1.43644	0.133478	0.304939
ENSG00000064652	SNX24	0.197256	0.759989	0.873775
ENSG00000172671	ZFAND4	-1.43481	0.0197168	0.0759762
ENSG00000064687	ABCA7	-0.0503134	0.816746	0.906807
ENSG00000253552	HOXA-AS2	-1.43474	0.000186696	0.00162463
ENSG00000064726	BTBD1	-0.00323264	0.983508	0.992021
ENSG00000268093	AC022154.1	-1.4321	0.0243809	0.08955
ENSG00000105641	SLC5A5	-1.42899	0.139218	0.313375
ENSG00000064932	SBNO2	-0.0708974	0.656598	0.810175
ENSG00000108602	ALDH3A1	-1.42694	0.196008	0.393063
ENSG00000279839	AL512383.1	-1.42461	0.315515	0.532204
ENSG00000064989	CALCRL	0.100739	0.746352	0.866036
ENSG00000064995	TAF11	0.0766687	0.664373	0.814986
ENSG00000181450	ZNF678	-1.42451	0.0127036	0.0542405
ENSG00000065000	AP3D1	-0.0590988	0.603739	0.775161
ENSG00000065029	ZNF76	-0.0449807	0.824698	0.909914
ENSG00000007968	E2F2	-1.42407	8.06499e-08	1.76134e-06
ENSG00000276043	UHRF1	-1.42056	5.98666e-14	3.88468e-12
ENSG00000141655	TNFRSF11A	-1.42	0.15755	0.340194
ENSG00000198794	SCAMP5	-1.41812	0.000124418	0.00114861
ENSG00000211584	SLC48A1	-1.41798	9.53272e-18	1.09717e-15
ENSG00000146918	NCAPG2	-1.41203	1.70924e-09	5.29495e-08
ENSG00000105679	GAPDHS	-1.40901	0.0121408	0.0524052
ENSG00000262814	MRPL12	-1.40895	1.52067e-05	0.000181926
ENSG00000113356	POLR3G	-1.40756	0.00505524	0.0259701
ENSG00000204511	MCCD1	-1.40723	0.211773	0.412914
ENSG00000269792	AC011500.3	-1.40596	0.0573596	0.167739
ENSG00000228201	AL022341.1	-1.40361	0.134247	0.306279
ENSG00000249797	LINC02147	-1.40302	0.00698605	0.0336046
ENSG00000242396	AC096536.3	-1.40274	0.00507389	0.0260264
ENSG00000169247	SH3TC2	-1.40048	0.190395	0.386277
ENSG00000101187	SLCO4A1	-1.39993	4.57928e-07	8.14049e-06
ENSG00000145882	PCYOX1L	-1.39973	2.28668e-11	9.96033e-10
ENSG00000065491	TBC1D22B	0.0582823	0.717727	0.848311
ENSG00000065518	NDUFB4	-0.0559304	0.760876	0.87402
ENSG00000166803	PCLAF	-1.39857	4.06901e-10	1.39479e-08
ENSG00000065534	MYLK	-0.100067	0.909379	0.954517
ENSG00000254978	ALG1L9P	-1.39647	0.0185461	0.0725106
ENSG00000065559	MAP2K4	0.0903308	0.612278	0.781353
ENSG00000065600	TMEM206	0.0103182	0.957051	0.979094
ENSG00000065613	SLK	-0.124622	0.526245	0.719923
ENSG00000228007	AC011933.1	-1.39643	0.124685	0.290791
ENSG00000102780	DGKH	-1.39639	0.181432	0.373302
ENSG00000065665	SEC61A2	0.0785057	0.75016	0.868085
ENSG00000065057	NTHL1	-1.39469	1.24733e-07	2.56426e-06
ENSG00000186652	PRG2	-1.39426	0.00516582	0.0264206
ENSG00000100448	CTSG	-1.39355	7.46991e-28	2.50607e-25
ENSG00000131188	PRR7	-1.39211	2.58507e-07	4.91694e-06
ENSG00000105997	HOXA3	-1.39143	7.37957e-08	1.62289e-06
ENSG00000065883	CDK13	-0.0660131	0.686477	0.827994
ENSG00000134398	ERN2	-1.39113	0.0301928	0.104564
ENSG00000065923	SLC9A7	0.0865179	0.652344	0.807459
ENSG00000162572	SCNN1D	-1.39065	0.0765791	0.206687
ENSG00000203883	SOX18	-1.39006	0.000802707	0.0056379
ENSG00000184986	TMEM121	-1.38946	0.0619309	0.177647
ENSG00000018236	CNTN1	-1.38916	0.024087	0.0887806
ENSG00000159339	PADI4	-1.38844	1.66251e-10	6.15363e-09
ENSG00000173083	HPSE	-1.38819	0.0125791	0.053811
ENSG00000066084	DIP2B	0.0555001	0.724887	0.852723
ENSG00000175130	MARCKSL1	-1.38794	3.82718e-11	1.60497e-09
ENSG00000196565	HBG2	-1.3877	0.408405	0.622221
ENSG00000180316	PNPLA1	-1.38725	0.017334	0.0687948
ENSG00000259781	HMGB1P6	-1.38563	7.89828e-11	3.1135e-09
ENSG00000104814	MAP4K1	-1.38404	1.07675e-07	2.23986e-06
ENSG00000231970	AL355490.2	-1.38381	0.0631816	0.180186
ENSG00000279827	AC136469.2	-1.3831	2.49114e-05	0.00028158
ENSG00000066322	ELOVL1	0.0806651	0.560834	0.745725
ENSG00000255750	AC022509.1	-1.38278	0.14191	0.317511
ENSG00000269600	AC016629.3	-1.38271	0.12625	0.293215
ENSG00000037280	FLT4	-1.38264	0.15058	0.330366
ENSG00000226781	TBCAP1	-1.38223	0.129323	0.29856
ENSG00000143845	ETNK2	-1.38095	0.213919	0.415234
ENSG00000066557	LRRC40	-0.0540977	0.821857	0.909279
ENSG00000196081	ZNF724	-1.38027	0.117776	0.279094
ENSG00000125885	MCM8	-1.37884	2.21256e-08	5.40055e-07
ENSG00000273723	AL139089.1	-1.37775	0.191372	0.387314
ENSG00000066697	MSANTD3	-0.141823	0.62176	0.787147
ENSG00000274173	AL035661.1	-1.37387	0.00191768	0.0116704
ENSG00000264112	AC015813.1	-1.37317	5.16982e-05	0.000530369
ENSG00000066777	ARFGEF1	0.119404	0.50147	0.7011
ENSG00000260997	AC004847.1	-1.37192	5.12652e-05	0.000526612
ENSG00000066855	MTFR1	0.127181	0.57318	0.754016
ENSG00000127589	TUBBP1	-1.37173	0.0325128	0.110777
ENSG00000167994	RAB3IL1	-1.37101	0.0105567	0.0469556
ENSG00000066933	MYO9A	0.178843	0.561222	0.745962
ENSG00000189403	HMGB1	-1.37038	5.23238e-23	1.14589e-20
ENSG00000185101	ANO9	-1.3687	0.0613124	0.176162
ENSG00000125430	HS3ST3B1	-1.36768	5.14893e-05	0.00052857
ENSG00000257335	MGAM	-1.36764	3.15358e-05	0.000345317
ENSG00000171357	LURAP1	-1.36743	0.247384	0.456977
ENSG00000273013	AC117490.2	-1.36742	0.099509	0.248158
ENSG00000067141	NEO1	0.404797	0.504629	0.703349
ENSG00000164989	CCDC171	-1.3645	0.0656126	0.184853
ENSG00000067182	TNFRSF1A	-0.0399318	0.760134	0.873792
ENSG00000012124	CD22	-1.36437	0.204266	0.403921
ENSG00000144681	STAC	-1.36339	0.0594154	0.17187
ENSG00000123219	CENPK	-1.36316	1.4409e-05	0.000173568
ENSG00000163082	SGPP2	-1.36198	0.0243353	0.0894801
ENSG00000231822	AC019097.1	-1.36164	0.0789222	0.210923
ENSG00000137124	ALDH1B1	-1.3615	3.95149e-09	1.13699e-07
ENSG00000067365	METTL22	-0.0433453	0.869008	0.932334
ENSG00000170364	SETMAR	-1.35973	5.96368e-08	1.33763e-06
ENSG00000067445	TRO	-0.103263	0.924106	0.963579
ENSG00000227076	AL158166.1	-1.35968	0.0843225	0.220863
ENSG00000067560	RHOA	-0.0776053	0.525137	0.719378
ENSG00000067596	DHX8	-0.109171	0.531692	0.723985
ENSG00000067601	PMS2P4	-0.335361	0.500608	0.700469
ENSG00000138587	MNS1	-1.3596	0.029717	0.103302
ENSG00000067646	ZFY	0.0484959	0.860381	0.928512
ENSG00000211895	IGHA1	-1.35864	0.0900759	0.231964
ENSG00000067829	IDH3G	0.00415239	0.978117	0.989634
ENSG00000067836	ROGDI	-0.0375617	0.810775	0.903485
ENSG00000137404	NRM	-1.35858	5.69879e-09	1.56548e-07
ENSG00000278376	AP004609.3	-1.35824	0.154412	0.335645
ENSG00000147036	LANCL3	-1.35813	0.163634	0.347967
ENSG00000068001	HYAL2	0.0899565	0.652458	0.807459
ENSG00000068024	HDAC4	0.0714429	0.719062	0.849165
ENSG00000132967	HMGB1P5	-1.35737	2.09453e-10	7.55958e-09
ENSG00000068078	FGFR3	-0.292091	0.619962	0.786199
ENSG00000234618	RPSAP9	-1.3562	0.0954569	0.241406
ENSG00000151876	FBXO4	-1.35502	5.77372e-07	1.00154e-05
ENSG00000068120	COASY	-0.066949	0.670493	0.819053
ENSG00000107104	KANK1	-1.35382	2.40909e-07	4.62686e-06
ENSG00000068305	MEF2A	0.0775031	0.682277	0.82491
ENSG00000229953	AL590666.2	-1.35288	0.0645535	0.18294
ENSG00000116649	SRM	-1.35228	2.33415e-13	1.35312e-11
ENSG00000111602	TIMELESS	-1.35196	1.50606e-15	1.23044e-13
ENSG00000255769	GOLGA2P10	-1.35026	0.237097	0.445066
ENSG00000171848	RRM2	-1.34911	3.10456e-10	1.09514e-08
ENSG00000188710	QRFP	-1.34874	0.107294	0.262174
ENSG00000176208	ATAD5	-1.34728	1.93206e-06	2.91808e-05
ENSG00000276073	AL034549.2	-1.34678	0.0987538	0.246775
ENSG00000149503	INCENP	-1.34471	8.05684e-14	5.08097e-12
ENSG00000233184	AC093157.1	-1.34382	0.000163138	0.00144678
ENSG00000065328	MCM10	-1.34353	3.2184e-06	4.63873e-05
ENSG00000162881	OXER1	-1.33834	0.00956853	0.0434427
ENSG00000040275	SPDL1	-1.33463	1.57677e-06	2.43751e-05
ENSG00000203943	SAMD13	-1.33335	0.0720932	0.197805
ENSG00000230457	PA2G4P4	-1.33136	0.0274544	0.0975442
ENSG00000261801	LOXL1-AS1	-1.32996	4.13384e-05	0.00043484
ENSG00000164687	FABP5	-1.32801	2.55149e-06	3.77057e-05
ENSG00000068878	PSME4	-0.0622232	0.680723	0.824586
ENSG00000068885	IFT80	-0.18316	0.531987	0.724096
ENSG00000163879	DNALI1	-1.3275	0.0767668	0.20705
ENSG00000109107	ALDOC	-1.32695	3.04349e-05	0.000335592
ENSG00000184058	TBX1	-1.32677	0.132495	0.303295
ENSG00000068976	PYGM	0.219466	0.790392	0.89129
ENSG00000069020	MAST4	0.0602409	0.822955	0.909618
ENSG00000235314	LINC00957	-1.32534	0.0738784	0.2016
ENSG00000188985	DHFRP1	-1.32533	0.104734	0.257363
ENSG00000125246	CLYBL	-1.3244	0.00100949	0.00679372
ENSG00000107779	BMPR1A	-1.3222	0.111917	0.269856
ENSG00000125319	C17orf53	-1.32159	0.000152444	0.00136809
ENSG00000145491	ROPN1L	-1.3213	0.00443008	0.0233234
ENSG00000069424	KCNAB2	-0.0689964	0.532304	0.724346
ENSG00000279069	AC015813.5	-1.31805	8.60931e-07	1.42596e-05
ENSG00000126878	AIF1L	-1.31792	2.21313e-05	0.000254348
ENSG00000058804	NDC1	-1.31439	1.9489e-14	1.3361e-12
ENSG00000271730	AL390208.1	-1.3141	1.2644e-05	0.000153599
ENSG00000160298	C21orf58	-1.31379	6.99349e-06	9.12858e-05
ENSG00000233006	MIR3936HG	-1.31325	0.00263935	0.0152724
ENSG00000157303	SUSD3	-1.3132	1.99546e-06	3.00519e-05
ENSG00000069956	MAPK6	-0.0687158	0.711224	0.843928
ENSG00000109452	INPP4B	-1.313	7.0836e-05	0.000700277
ENSG00000253133	AC009630.1	-1.30795	0.0753872	0.204456
ENSG00000232803	SLCO4A1-AS1	-1.30781	0.00521149	0.0266282
ENSG00000070010	UFD1	-0.0458637	0.764949	0.876897
ENSG00000166823	MESP1	-1.30607	0.00692148	0.0333653
ENSG00000075702	WDR62	-1.30525	1.15277e-05	0.000142007
ENSG00000249485	RBBP4P1	-1.30475	0.0289792	0.101295
ENSG00000070182	SPTB	0.427667	0.709168	0.842601
ENSG00000211898	IGHD	-1.30435	0.0139944	0.0585936
ENSG00000163006	CCDC138	-1.30435	0.00134889	0.00870978
ENSG00000185885	IFITM1	-1.30378	0.000145658	0.00131468
ENSG00000070269	TMEM260	0.0628569	0.76524	0.877072
ENSG00000237786	GFOD1-AS1	-1.30275	0.0752892	0.20433
ENSG00000237311	AL034397.2	-1.30242	0.0422812	0.134062
ENSG00000070371	CLTCL1	-0.145551	0.753718	0.87055
ENSG00000073536	NLE1	-1.30158	1.39725e-07	2.84373e-06
ENSG00000070413	DGCR2	-0.0101294	0.947409	0.974602
ENSG00000238133	MAP3K20-AS1	-1.30123	0.0390731	0.12651
ENSG00000135763	URB2	-1.30018	3.07734e-07	5.68857e-06
ENSG00000070476	ZXDC	0.088038	0.601356	0.773779
ENSG00000152492	CCDC50	-1.29735	0.17885	0.369946
ENSG00000070501	POLB	0.104329	0.66083	0.813095
ENSG00000258813	AL442663.3	-1.29574	0.0689159	0.191449
ENSG00000228661	AC090587.1	-1.29418	0.156193	0.338258
ENSG00000104369	JPH1	-1.29368	0.00859325	0.0397589
ENSG00000070718	AP3M2	-0.172643	0.614125	0.782506
ENSG00000076003	MCM6	-1.29173	3.91581e-11	1.63345e-09
ENSG00000254846	AL355075.1	-1.29163	0.136537	0.30946
ENSG00000133027	PEMT	-1.29048	1.70325e-05	0.000200275
ENSG00000255121	AP003392.4	-1.29012	0.0258923	0.0935753
ENSG00000070770	CSNK2A2	0.0486759	0.750446	0.86828
ENSG00000164611	PTTG1	-1.28678	4.54434e-10	1.54763e-08
ENSG00000140905	GCSH	-1.28646	0.251104	0.461523
ENSG00000070831	CDC42	-0.0574944	0.64373	0.802842
ENSG00000141574	SECTM1	-1.28598	0.00685034	0.0330628
ENSG00000262312	AC004494.1	-1.28425	0.120202	0.283183
ENSG00000239415	AP001469.3	-1.28214	0.0775174	0.208263
ENSG00000250722	SELENOP	-1.28137	5.61668e-11	2.2944e-09
ENSG00000013016	EHD3	-1.28098	0.00455767	0.0238676
ENSG00000071073	MGAT4A	0.0549343	0.733044	0.857541
ENSG00000136514	RTP4	-1.27913	0.244979	0.45397
ENSG00000167419	LPO	-1.27843	0.000290237	0.00236387
ENSG00000254872	AC139749.1	-1.27762	0.19705	0.394393
ENSG00000163909	HEYL	-1.27697	0.0317533	0.108622
ENSG00000120800	UTP20	-1.27656	3.61791e-06	5.15332e-05
ENSG00000129484	PARP2	-1.27634	5.87664e-05	0.000593993
ENSG00000071462	BUD23	0.0128528	0.933477	0.968023
ENSG00000071537	SEL1L	-0.0730566	0.645543	0.803515
ENSG00000169258	GPRIN1	-1.27603	0.233268	0.440026
ENSG00000010327	STAB1	-1.27562	1.7769e-09	5.47229e-08
ENSG00000223901	AP001469.1	-1.27454	0.0982832	0.245891
ENSG00000179403	VWA1	-1.27267	0.0439048	0.137879
ENSG00000138376	BARD1	-1.27029	3.85581e-05	0.000408752
ENSG00000275793	RIMBP3	-1.26959	0.140563	0.315546
ENSG00000071794	HLTF	-0.0617888	0.772769	0.881567
ENSG00000175445	LPL	-1.2673	0.108183	0.263692
ENSG00000071889	FAM3A	0.068023	0.662965	0.81448
ENSG00000071894	CPSF1	-0.10116	0.599609	0.772617
ENSG00000071967	CYBRD1	-0.117126	0.524538	0.719147
ENSG00000237286	AC004906.1	-1.26658	0.113803	0.273171
ENSG00000198720	ANKRD13B	-1.26606	0.000575492	0.00423837
ENSG00000228716	DHFR	-1.2653	1.18235e-13	7.25423e-12
ENSG00000119737	GPR75	-1.265	0.162014	0.346088
ENSG00000072110	ACTN1	0.042863	0.765472	0.877178
ENSG00000270696	AC005034.3	-1.26392	0.00348934	0.0192109
ENSG00000225791	TRAM2-AS1	-1.26357	0.0191907	0.0745686
ENSG00000120802	TMPO	-1.26355	4.61609e-21	8.27119e-19
ENSG00000072201	LNX1	0.0820328	0.776244	0.883357
ENSG00000085662	AKR1B1	-1.26087	1.89875e-08	4.71489e-07
ENSG00000163958	ZDHHC19	-1.25893	0.093044	0.237398
ENSG00000258227	CLEC5A	-1.25887	0.000105456	0.000990957
ENSG00000259375	AC087286.3	-1.25853	0.282391	0.498196
ENSG00000072401	UBE2D1	0.101003	0.567599	0.750404
ENSG00000072415	MPP5	0.190674	0.523444	0.718335
ENSG00000072422	RHOBTB1	-0.190509	0.66251	0.814217
ENSG00000104147	OIP5	-1.25791	0.000125818	0.00116017
ENSG00000260773	AC055855.2	-1.25433	0.0766447	0.206799
ENSG00000173567	ADGRF3	-1.25386	0.199728	0.397941
ENSG00000236081	ELFN1-AS1	-1.2537	0.0426812	0.135031
ENSG00000121621	KIF18A	-1.25337	0.00089107	0.00615435
ENSG00000072682	P4HA2	0.31412	0.579852	0.758968
ENSG00000142512	SIGLEC10	-1.25271	3.12843e-06	4.52145e-05
ENSG00000264031	ABHD15-AS1	-1.25256	0.0848747	0.221941
ENSG00000262528	AL022341.2	-1.25162	0.0429299	0.135628
ENSG00000224739	AC016735.1	-1.25144	1.09338e-05	0.00013618
ENSG00000157036	EXOG	-1.25071	1.58451e-05	0.000188847
ENSG00000072803	FBXW11	-0.0330789	0.838065	0.916798
ENSG00000072818	ACAP1	-0.0542216	0.74455	0.864724
ENSG00000235042	AC098820.2	-1.24801	0.285888	0.501176
ENSG00000213928	IRF9	-1.24719	0.0814008	0.215538
ENSG00000107736	CDH23	-1.24646	0.0534428	0.159449
ENSG00000115112	TFCP2L1	-1.24556	0.172933	0.361231
ENSG00000220937	HNRNPA1P41	-1.24435	0.140383	0.315366
ENSG00000073008	PVR	-0.0662136	0.737371	0.859904
ENSG00000073050	XRCC1	0.0406051	0.814823	0.90601
ENSG00000108021	FAM208B	-1.24417	2.5931e-07	4.92627e-06
ENSG00000251196	AC106760.1	-1.24405	0.145076	0.32247
ENSG00000104524	PYCR3	-1.24311	5.50396e-07	9.58966e-06
ENSG00000135108	FBXO21	-1.24189	0.00011828	0.00109579
ENSG00000022267	FHL1	-1.24146	0.0355878	0.117988
ENSG00000151746	BICD1	-1.24083	0.0112899	0.0494908
ENSG00000144550	CPNE9	-1.24055	0.106132	0.25998
ENSG00000085840	ORC1	-1.23933	3.19115e-10	1.12067e-08
ENSG00000129521	EGLN3	-1.23894	0.174655	0.363511
ENSG00000160352	ZNF714	-1.23846	1.52363e-05	0.000182143
ENSG00000205426	KRT81	-1.23824	0.00250772	0.0146451
ENSG00000151575	TEX9	-1.23668	0.0561352	0.165076
ENSG00000146350	TBC1D32	-1.23474	0.0811646	0.21507
ENSG00000145416	MARCH1	-1.23409	0.161978	0.346088
ENSG00000254027	AC009902.2	-1.23113	0.000103965	0.000977534
ENSG00000213160	KLHL23	-1.23023	0.00084749	0.00588688
ENSG00000113924	HGD	-1.23019	0.0026355	0.0152557
ENSG00000119699	TGFB3	-1.22791	0.015727	0.0638473
ENSG00000240891	PLCXD2	-1.22669	0.111121	0.268529
ENSG00000148019	CEP78	-1.22401	3.56398e-07	6.4446e-06
ENSG00000073849	ST6GAL1	-0.0206953	0.919566	0.960692
ENSG00000166348	USP54	-1.22244	2.76787e-07	5.22055e-06
ENSG00000145604	SKP2	-1.22209	1.6195e-08	4.07278e-07
ENSG00000168811	IL12A	-1.22074	0.0377241	0.123266
ENSG00000073969	NSF	0.00547076	0.97383	0.987411
ENSG00000101003	GINS1	-1.22058	1.00172e-07	2.1173e-06
ENSG00000272114	AL136131.3	-1.21868	0.0312338	0.107414
ENSG00000186615	KTN1-AS1	-1.21685	0.0525988	0.157578
ENSG00000171680	PLEKHG5	-1.21617	0.267747	0.481121
ENSG00000188897	AC099489.1	-1.21597	0.00825824	0.0384344
ENSG00000074219	TEAD2	0.102553	0.865727	0.931688
ENSG00000196584	XRCC2	-1.21477	0.0013801	0.00888221
ENSG00000173894	CBX2	-1.21453	0.000197341	0.0017041
ENSG00000153044	CENPH	-1.2129	2.8327e-07	5.30476e-06
ENSG00000237350	CDC42P6	-1.2129	0.133058	0.304242
ENSG00000100985	MMP9	-1.21239	0.200669	0.399019
ENSG00000113140	SPARC	-1.21224	0.0521774	0.156794
ENSG00000070193	FGF10	-1.21094	0.101986	0.252433
ENSG00000074621	SLC24A1	-0.0271942	0.897986	0.948396
ENSG00000232934	AL157786.1	-1.21064	0.021348	0.0808394
ENSG00000197375	SLC22A5	-1.21001	0.0107658	0.0477312
ENSG00000170522	ELOVL6	-1.20906	0.000524828	0.00392762
ENSG00000074706	IPCEF1	-0.309408	0.611951	0.781062
ENSG00000074755	ZZEF1	-0.039527	0.776541	0.883406
ENSG00000054793	ATP9A	-1.208	0.0264249	0.0948845
ENSG00000074842	MYDGF	-0.0956627	0.568281	0.750705
ENSG00000198865	CCDC152	-1.20707	1.76443e-12	9.06238e-11
ENSG00000085265	FCN1	-1.20706	1.58315e-07	3.16792e-06
ENSG00000167536	DHRS13	-1.20697	3.03657e-09	9.03409e-08
ENSG00000141756	FKBP10	-1.20577	0.153266	0.334214
ENSG00000075089	ACTR6	-0.121928	0.622069	0.787382
ENSG00000234171	RNASEH1-AS1	-1.20544	0.0044053	0.0232162
ENSG00000251279	SMIM15-AS1	-1.20449	0.0064403	0.0315375
ENSG00000138772	ANXA3	-1.20304	6.24265e-10	2.0899e-08
ENSG00000099284	H2AFY2	-1.20262	2.30585e-08	5.59907e-07
ENSG00000135898	GPR55	-1.20194	0.172486	0.360424
ENSG00000178921	PFAS	-1.20193	6.40326e-14	4.10433e-12
ENSG00000244490	RWDD4P1	-1.20167	0.0982321	0.245891
ENSG00000075234	TTC38	0.0242237	0.878959	0.938059
ENSG00000225695	HNRNPA1P35	-1.20116	0.142898	0.319042
ENSG00000164929	BAALC	-1.20068	0.247768	0.457526
ENSG00000151725	CENPU	-1.20006	4.31357e-08	9.98772e-07
ENSG00000226784	PGAM4	-1.1992	0.108832	0.264785
ENSG00000114346	ECT2	-1.19902	6.87818e-07	1.1687e-05
ENSG00000268095	ZNF649-AS1	-1.19886	0.109122	0.265244
ENSG00000075340	ADD2	-0.370732	0.698998	0.835346
ENSG00000075391	RASAL2	0.0653216	0.828879	0.912311
ENSG00000169710	FASN	-1.19856	1.8121e-19	2.72126e-17
ENSG00000075407	ZNF37A	-0.133044	0.543658	0.732057
ENSG00000196421	C20orf204	-1.19812	0.257789	0.468996
ENSG00000120254	MTHFD1L	-1.19801	1.89067e-07	3.70796e-06
ENSG00000147206	NXF3	-1.19654	0.017763	0.0700391
ENSG00000256747	AC009511.2	-1.19648	0.136017	0.308637
ENSG00000075539	FRYL	0.096663	0.642703	0.802083
ENSG00000267135	AD000091.1	-1.19459	0.158822	0.341838
ENSG00000179041	RRS1	-1.19301	1.20441e-09	3.82114e-08
ENSG00000138131	LOXL4	-1.19262	0.249192	0.459187
ENSG00000075643	MOCOS	0.304058	0.55189	0.738671
ENSG00000124140	SLC12A5	-1.19155	0.11019	0.267097
ENSG00000164742	ADCY1	-1.19107	0.145	0.322454
ENSG00000152128	TMEM163	-1.19078	0.217998	0.420167
ENSG00000075785	RAB7A	-0.0278175	0.835107	0.915968
ENSG00000075790	BCAP29	-0.0578798	0.737125	0.85988
ENSG00000075826	SEC31B	0.248303	0.550377	0.737623
ENSG00000116675	DNAJC6	-1.19049	0.00191138	0.0116366
ENSG00000075884	ARHGAP15	0.0325165	0.808681	0.902426
ENSG00000205670	SMIM11A	-1.19039	0.13406	0.306001
ENSG00000075945	KIFAP3	0.0140867	0.962237	0.981871
ENSG00000145088	EAF2	-1.19	6.09101e-10	2.04783e-08
ENSG00000072501	SMC1A	-1.1894	2.03872e-11	8.9795e-10
ENSG00000091436	MAP3K20	-1.18853	6.81281e-10	2.26634e-08
ENSG00000076053	RBM7	0.0732003	0.686661	0.828056
ENSG00000112053	SLC26A8	-1.18839	0.000641909	0.00464982
ENSG00000076108	BAZ2A	0.00890669	0.950057	0.975978
ENSG00000105486	LIG1	-1.18828	2.01481e-11	8.92403e-10
ENSG00000253729	PRKDC	-1.18583	1.27958e-16	1.20098e-14
ENSG00000184227	ACOT1	-1.18538	0.210553	0.411461
ENSG00000076258	FMO4	0.0842553	0.845794	0.921099
ENSG00000076321	KLHL20	0.189953	0.537861	0.727608
ENSG00000142405	NLRP12	-1.18478	0.0333696	0.112731
ENSG00000123473	STIL	-1.18396	4.73607e-05	0.000491305
ENSG00000137310	TCF19	-1.1838	3.56458e-06	5.08654e-05
ENSG00000145555	MYO10	-1.18104	0.0534032	0.159391
ENSG00000102524	TNFSF13B	-1.18025	3.21321e-10	1.12591e-08
ENSG00000088899	LZTS3	-1.17936	0.130775	0.300723
ENSG00000182134	TDRKH	-1.17885	0.185905	0.379542
ENSG00000121957	GPSM2	-1.178	5.26679e-12	2.56317e-10
ENSG00000182600	C2orf82	-1.17541	0.301768	0.517317
ENSG00000076650	GPATCH1	0.0282462	0.910035	0.954702
ENSG00000004866	ST7	-1.17382	0.0757279	0.205133
ENSG00000124019	FAM124B	-1.17143	0.00165025	0.0102891
ENSG00000017483	SLC38A5	-1.17116	4.67516e-07	8.30156e-06
ENSG00000254469	AP002495.1	-1.16967	0.095298	0.241275
ENSG00000163507	CIP2A	-1.16956	1.99846e-06	3.00685e-05
ENSG00000197256	KANK2	-1.16883	9.58408e-08	2.04495e-06
ENSG00000158483	FAM86C1	-1.16794	0.000611091	0.00447209
ENSG00000158714	SLAMF8	-1.16655	0.0555114	0.163853
ENSG00000176401	EID2B	-1.16644	0.00568687	0.0284849
ENSG00000076984	MAP2K7	-0.0921234	0.528286	0.721509
ENSG00000275719	AC008622.2	-1.16446	0.00103477	0.00692679
ENSG00000126602	TRAP1	-1.16403	3.5606e-12	1.75448e-10
ENSG00000173825	TIGD3	-1.16213	0.0292073	0.101935
ENSG00000136982	DSCC1	-1.16181	0.000102713	0.000968649
ENSG00000092445	TYRO3	-1.16153	0.00141544	0.0090579
ENSG00000077157	PPP1R12B	-0.164418	0.517408	0.714216
ENSG00000141505	ASGR1	-1.1601	0.224375	0.428468
ENSG00000077235	GTF3C1	0.0355045	0.792755	0.892629
ENSG00000136450	SRSF1	-1.16009	8.05261e-21	1.39531e-18
ENSG00000214783	POLR2J4	-1.15931	0.0649028	0.183666
ENSG00000233864	TTTY15	-1.159	0.00523209	0.0266994
ENSG00000224220	AC104699.1	-1.15892	0.0641731	0.182288
ENSG00000247077	PGAM5	-1.15863	3.11356e-09	9.21101e-08
ENSG00000079308	TNS1	-1.15723	0.0294295	0.102461
ENSG00000167216	KATNAL2	-1.1571	0.141934	0.317511
ENSG00000077458	FAM76B	-0.080435	0.729949	0.855291
ENSG00000169750	RAC3	-1.15699	0.000169169	0.0014902
ENSG00000159055	MIS18A	-1.15484	4.32462e-07	7.74014e-06
ENSG00000077549	CAPZB	-0.0332497	0.796638	0.894623
ENSG00000080546	SESN1	-1.154	9.80604e-17	9.37101e-15
ENSG00000267255	AC011498.3	-1.15246	0.00154803	0.00977544
ENSG00000077713	SLC25A43	-0.039386	0.899012	0.948817
ENSG00000077721	UBE2A	-0.0381255	0.770496	0.880057
ENSG00000273061	CDC37L1-AS1	-1.15147	0.213256	0.414472
ENSG00000273812	BX640514.2	-1.15147	0.0873142	0.226666
ENSG00000120158	RCL1	-1.14996	1.03153e-05	0.000129707
ENSG00000180066	C10orf91	-1.14799	0.0540734	0.160693
ENSG00000021300	PLEKHB1	-1.14759	0.102037	0.252459
ENSG00000136040	PLXNC1	-1.14728	6.15149e-06	8.1647e-05
ENSG00000078140	UBE2K	-0.0944465	0.549008	0.736258
ENSG00000141371	C17orf64	-1.14693	0.35163	0.568929
ENSG00000078177	N4BP2	-0.063783	0.789428	0.89052
ENSG00000277534	AC007996.1	-1.14584	0.038373	0.124807
ENSG00000078246	TULP3	-0.0989477	0.740448	0.862097
ENSG00000233328	PFN1P1	-1.14391	0.00300653	0.0169492
ENSG00000226777	FAM30A	-1.14347	1.74375e-12	9.01489e-11
ENSG00000165891	E2F7	-1.14312	0.0628009	0.179392
ENSG00000007129	CEACAM21	-1.14307	0.0793578	0.211764
ENSG00000132199	ENOSF1	-1.14304	1.4845e-15	1.21914e-13
ENSG00000185347	TEDC1	-1.14275	1.03501e-05	0.000129805
ENSG00000078487	ZCWPW1	-0.211272	0.535873	0.726727
ENSG00000188004	SNHG28	-1.14193	0.287227	0.50252
ENSG00000185760	KCNQ5	-1.14178	0.000604324	0.00442797
ENSG00000167775	CD320	-1.14098	7.69858e-06	9.95009e-05
ENSG00000198860	TSEN15	-1.14082	1.32902e-08	3.39642e-07
ENSG00000078674	PCM1	0.0825129	0.558774	0.744088
ENSG00000230724	LINC01001	-1.14036	0.28032	0.496082
ENSG00000122873	CISD1	-1.13964	2.68033e-05	0.00030038
ENSG00000078747	ITCH	0.0050644	0.979487	0.990162
ENSG00000078795	PKD2L2	0.215201	0.568927	0.751327
ENSG00000078804	TP53INP2	-0.0178107	0.93587	0.969375
ENSG00000078808	SDF4	0.0696959	0.569366	0.751529
ENSG00000132465	JCHAIN	-1.1392	0.069354	0.192359
ENSG00000078900	TP73	-0.016382	0.945922	0.973965
ENSG00000112039	FANCE	-1.1386	6.83171e-05	0.0006775
ENSG00000078967	UBE2D4	-0.150103	0.510943	0.708829
ENSG00000280202	AC005831.1	-1.13817	0.0186867	0.0729667
ENSG00000079134	THOC1	-0.152299	0.532365	0.724346
ENSG00000234882	EIF3EP1	-1.13644	0.261623	0.473298
ENSG00000132182	NUP210	-1.13626	5.26453e-16	4.61173e-14
ENSG00000204745	AC083899.1	-1.13622	0.151863	0.332257
ENSG00000275393	AC018695.6	-1.13605	0.260289	0.47171
ENSG00000167799	NUDT8	-1.1359	0.00977747	0.0441878
ENSG00000115556	PLCD4	-1.13575	0.000689293	0.00494873
ENSG00000012048	BRCA1	-1.13456	2.88029e-08	6.86048e-07
ENSG00000101546	RBFA	-1.13427	0.000204455	0.00175921
ENSG00000162607	USP1	-1.13366	5.15361e-09	1.43067e-07
ENSG00000266896	AL354892.3	-1.13268	0.209044	0.409398
ENSG00000151503	NCAPD3	-1.13267	4.89113e-08	1.1145e-06
ENSG00000141401	IMPA2	-1.13255	1.1457e-10	4.41696e-09
ENSG00000274373	AC148476.1	-1.13201	0.224481	0.428577
ENSG00000184675	AMER1	-1.13123	0.0115155	0.0502285
ENSG00000251669	FAM86EP	-1.13115	0.0447135	0.139668
ENSG00000272092	AC087623.3	-1.12897	0.164336	0.34913
ENSG00000139438	FAM222A	-1.12842	0.0580324	0.16911
ENSG00000233922	LINC01694	-1.12809	0.0267621	0.0956232
ENSG00000116544	DLGAP3	-1.12771	0.297315	0.513366
ENSG00000079691	CARMIL1	0.595216	0.543098	0.731491
ENSG00000173207	CKS1B	-1.12665	1.30965e-07	2.6819e-06
ENSG00000230555	AL450326.1	-1.12555	0.163159	0.347379
ENSG00000103404	USP31	-1.12526	6.71642e-05	0.000667326
ENSG00000182628	SKA2	-1.12381	1.2919e-07	2.64898e-06
ENSG00000213390	ARHGAP19	-1.12263	1.49208e-06	2.31926e-05
ENSG00000260381	AC007610.2	-1.12191	0.0680512	0.189648
ENSG00000079999	KEAP1	-0.00556229	0.964504	0.983447
ENSG00000100714	MTHFD1	-1.12161	5.02039e-11	2.06688e-09
ENSG00000127564	PKMYT1	-1.1214	2.28065e-07	4.40163e-06
ENSG00000169684	CHRNA5	-1.12096	0.218653	0.421088
ENSG00000175274	TP53I11	-1.12053	0.00029224	0.00237773
ENSG00000142856	ITGB3BP	-1.12037	3.22046e-07	5.90467e-06
ENSG00000234494	SP2-AS1	-1.12035	0.264633	0.477327
ENSG00000183763	TRAIP	-1.11963	0.00156509	0.00987131
ENSG00000080503	SMARCA2	-0.0554691	0.693006	0.831544
ENSG00000170264	FAM161A	-1.11947	0.0670546	0.187601
ENSG00000256667	KLRA1P	-1.11936	0.134688	0.306935
ENSG00000139514	SLC7A1	-1.11845	3.05762e-08	7.26093e-07
ENSG00000274791	F8A2	-1.11757	0.265012	0.477786
ENSG00000112118	MCM3	-1.11698	1.02806e-15	8.53184e-14
ENSG00000080819	CPOX	0.0455371	0.812367	0.904491
ENSG00000073670	ADAM11	-1.11685	0.267401	0.480663
ENSG00000183137	CEP57L1	-1.11592	4.93632e-06	6.75072e-05
ENSG00000134824	FADS2	-1.11551	5.79978e-08	1.30644e-06
ENSG00000168496	FEN1	-1.11508	7.80936e-10	2.57073e-08
ENSG00000014138	POLA2	-1.11492	1.96342e-05	0.000228144
ENSG00000080854	IGSF9B	-0.103026	0.73137	0.85627
ENSG00000240972	MIF	-1.11449	0.000233612	0.00196773
ENSG00000259456	ADNP-AS1	-1.11427	0.0992669	0.247743
ENSG00000077312	SNRPA	-1.11268	3.86599e-11	1.61695e-09
ENSG00000081019	RSBN1	0.0725989	0.752705	0.86988
ENSG00000081026	MAGI3	-0.71936	0.512326	0.709987
ENSG00000081041	CXCL2	-0.0023458	0.995608	0.998394
ENSG00000150054	MPP7	-1.11218	3.5533e-05	0.000382186
ENSG00000159259	CHAF1B	-1.11205	0.000103453	0.000973295
ENSG00000081154	PCNP	0.0640901	0.637345	0.798571
ENSG00000154102	C16orf74	-1.11174	9.00061e-09	2.36931e-07
ENSG00000149292	TTC12	-1.11171	0.0804783	0.213705
ENSG00000128050	PAICS	-1.11162	7.23407e-12	3.41517e-10
ENSG00000109680	TBC1D19	-1.11161	0.0997675	0.24856
ENSG00000149554	CHEK1	-1.11085	6.55813e-07	1.12035e-05
ENSG00000081320	STK17B	-0.0285028	0.872282	0.93462
ENSG00000081377	CDC14B	0.139941	0.87451	0.936135
ENSG00000081386	ZNF510	-0.142831	0.608106	0.777791
ENSG00000121211	MND1	-1.10932	0.00446493	0.0234755
ENSG00000081692	JMJD4	0.110848	0.582857	0.761055
ENSG00000081721	DUSP12	-0.0283697	0.898397	0.948466
ENSG00000081760	AACS	0.132012	0.502227	0.701215
ENSG00000081791	KIAA0141	0.0866739	0.503638	0.702309
ENSG00000236364	AL358115.1	-1.10839	0.00117182	0.00770208
ENSG00000271936	AC012073.1	-1.10668	0.00414698	0.0221021
ENSG00000081923	ATP8B1	-0.388361	0.623278	0.788215
ENSG00000183628	DGCR6	-1.10653	6.59934e-06	8.70373e-05
ENSG00000082068	WDR70	0.072716	0.71895	0.849105
ENSG00000260545	AC026771.1	-1.10598	0.00442919	0.0233234
ENSG00000259052	AL157871.6	-1.10523	0.0293188	0.102143
ENSG00000082153	BZW1	0.0488682	0.728867	0.855067
ENSG00000082196	C1QTNF3	0.0789093	0.906644	0.952493
ENSG00000064199	SPA17	-1.10479	0.00238943	0.0140637
ENSG00000082213	C5orf22	0.0124579	0.9437	0.973075
ENSG00000263271	AC110285.4	-1.10456	0.00256485	0.0149235
ENSG00000082269	FAM135A	-0.00726365	0.99005	0.99527
ENSG00000283429	MIR1244-3	-1.10323	0.0627208	0.179261
ENSG00000254726	MEX3A	-1.10295	0.0832363	0.218927
ENSG00000267924	AC139769.2	-1.10122	0.0293794	0.102331
ENSG00000163864	NMNAT3	-1.10068	0.00143583	0.00917349
ENSG00000082641	NFE2L1	0.0270019	0.834287	0.915485
ENSG00000189337	KAZN	-1.09938	0.115234	0.275054
ENSG00000183814	LIN9	-1.09919	0.00191911	0.0116727
ENSG00000243156	MICAL3	-1.09905	0.0116158	0.050568
ENSG00000054392	HHAT	-1.0989	0.0374209	0.12257
ENSG00000251364	AC107884.1	-1.09823	0.324923	0.541535
ENSG00000083093	PALB2	0.00121488	0.996417	0.998489
ENSG00000083097	DOPEY1	-0.0357404	0.863586	0.930252
ENSG00000104691	UBXN8	-1.09813	0.000673321	0.0048457
ENSG00000255843	AP000593.3	-1.09736	0.0188017	0.0733098
ENSG00000182054	IDH2	-1.09587	7.20435e-11	2.86142e-09
ENSG00000115875	SRSF7	-1.09427	1.86355e-13	1.10468e-11
ENSG00000096060	FKBP5	-1.09381	1.03594e-11	4.80434e-10
ENSG00000224389	C4B	-1.09317	0.140796	0.31589
ENSG00000160062	ZBTB8A	-1.09301	0.073448	0.200855
ENSG00000204792	LINC01291	-1.09211	0.0622634	0.178309
ENSG00000196358	NTNG2	-1.09208	4.17852e-06	5.84104e-05
ENSG00000259083	AL132639.3	-1.09207	0.0272868	0.0971018
ENSG00000083535	PIBF1	-0.158159	0.573274	0.754016
ENSG00000159496	RGL4	-1.09159	2.90423e-06	4.2391e-05
ENSG00000135919	SERPINE2	-1.09153	0.120391	0.283459
ENSG00000238105	GOLGA2P5	-1.09081	0.0128278	0.0546364
ENSG00000278535	DHRS11	-1.08735	1.49149e-06	2.31926e-05
ENSG00000083750	RRAGB	0.13486	0.669899	0.818468
ENSG00000234818	AC007314.1	-1.0851	0.000338846	0.00270528
ENSG00000083807	SLC27A5	-0.106865	0.572315	0.753467
ENSG00000187010	RHD	-1.08355	0.281415	0.497374
ENSG00000198056	PRIM1	-1.08303	0.000229677	0.00193873
ENSG00000149418	ST14	-1.08199	0.0742154	0.20237
ENSG00000126249	PDCD2L	-1.08179	0.0561077	0.165026
ENSG00000083838	ZNF446	0.127562	0.637328	0.798571
ENSG00000280206	AC026401.3	-1.08177	0.000425292	0.00327762
ENSG00000083845	RPS5	0.0423642	0.754691	0.871218
ENSG00000259314	AC103739.2	-1.08173	0.300587	0.516507
ENSG00000204472	AIF1	-1.07959	5.93954e-09	1.62595e-07
ENSG00000116830	TTF2	-1.0795	1.11369e-07	2.30757e-06
ENSG00000229676	ZNF492	-1.07947	0.151073	0.331062
ENSG00000133805	AMPD3	-1.07912	6.18739e-09	1.68794e-07
ENSG00000236986	AL157938.2	-1.07888	0.0416034	0.132365
ENSG00000084092	NOA1	0.100129	0.661629	0.813773
ENSG00000091127	PUS7	-1.07886	8.75018e-05	0.000839785
ENSG00000146263	MMS22L	-1.07788	0.000529137	0.00395448
ENSG00000117632	STMN1	-1.07619	7.13045e-09	1.92522e-07
ENSG00000224888	AC138028.2	-1.07557	0.032538	0.110805
ENSG00000119333	WDR34	-1.07548	7.85248e-07	1.31861e-05
ENSG00000080839	RBL1	-1.07476	2.03362e-06	3.05683e-05
ENSG00000273084	AC092171.5	-1.07412	0.0271062	0.0966118
ENSG00000197744	PTMAP2	-1.07268	0.0973695	0.244595
ENSG00000084652	TXLNA	-0.0116351	0.928327	0.965685
ENSG00000084676	NCOA1	0.0719435	0.672789	0.820268
ENSG00000179698	WDR97	-1.07227	0.193684	0.390787
ENSG00000084731	KIF3C	0.011323	0.965784	0.983819
ENSG00000176619	LMNB2	-1.07136	1.24627e-18	1.6376e-16
ENSG00000247627	MTND4P12	-1.07069	0.0727333	0.199246
ENSG00000084764	MAPRE3	-0.0618676	0.766602	0.877707
ENSG00000259933	AC009065.2	-1.07001	0.0149699	0.0616659
ENSG00000240990	HOXA11-AS	-1.06976	0.0131088	0.0556394
ENSG00000131351	HAUS8	-1.06868	1.62921e-05	0.00019359
ENSG00000085185	BCORL1	0.0854241	0.634669	0.796709
ENSG00000101224	CDC25B	-1.06856	1.21052e-13	7.3697e-12
ENSG00000228253	MT-ATP8	-1.06836	0.112182	0.270349
ENSG00000139908	TSSK4	-1.06834	0.246318	0.455531
ENSG00000085274	MYNN	-0.107505	0.618394	0.785091
ENSG00000152782	PANK1	-1.06816	0.0153333	0.062683
ENSG00000085721	RRN3	-1.06814	5.3424e-11	2.19372e-09
ENSG00000235105	AL356968.2	-1.06683	0.288733	0.504347
ENSG00000130810	PPAN	-1.06641	0.0351447	0.116961
ENSG00000085433	WDR47	-0.0558666	0.82979	0.912741
ENSG00000243836	WDR86-AS1	-1.06597	0.0375496	0.122864
ENSG00000113810	SMC4	-1.06356	7.93709e-13	4.25687e-11
ENSG00000272910	AC090425.2	-1.06353	3.46306e-05	0.000374524
ENSG00000266642	AC024267.6	-1.0631	6.72063e-06	8.83091e-05
ENSG00000072134	EPN2	-1.06288	0.399652	0.614601
ENSG00000173272	MZT2A	-1.06227	6.24906e-08	1.39174e-06
ENSG00000221995	TIAF1	-1.06081	0.0366041	0.120496
ENSG00000273090	AC007378.1	-1.0607	0.269031	0.482822
ENSG00000277597	AC130343.2	-1.06058	0.260296	0.47171
ENSG00000181577	C6orf223	-1.05934	0.321379	0.538293
ENSG00000123700	KCNJ2	-1.05883	0.0206556	0.0788615
ENSG00000076554	TPD52	-1.05805	0.00389572	0.021073
ENSG00000148429	USP6NL	-1.05753	3.64735e-10	1.25845e-08
ENSG00000172817	CYP7B1	-1.05723	0.0290327	0.101437
ENSG00000116120	FARSB	-1.05589	9.93728e-10	3.20603e-08
ENSG00000123689	G0S2	-1.05531	0.231283	0.437695
ENSG00000185842	DNAH14	-1.05521	0.0453519	0.141093
ENSG00000272909	AL122035.2	-1.05452	0.000176849	0.00155265
ENSG00000085978	ATG16L1	0.0725314	0.73211	0.856945
ENSG00000085982	USP40	-0.000726188	0.997029	0.998489
ENSG00000167325	RRM1	-1.05426	1.34481e-09	4.23251e-08
ENSG00000133026	MYH10	-1.05277	0.0832276	0.218927
ENSG00000086015	MAST2	-0.00505952	0.977875	0.989547
ENSG00000178409	BEND3	-1.05273	0.00272708	0.0156442
ENSG00000250222	AC008443.5	-1.05231	0.139377	0.313615
ENSG00000145194	ECE2	-1.05195	0.00014764	0.001328
ENSG00000086102	NFX1	0.107731	0.54133	0.730233
ENSG00000168081	PNOC	-1.05195	0.106784	0.261251
ENSG00000134490	TMEM241	-1.05143	0.00833822	0.0387723
ENSG00000204177	BMS1P1	-1.05113	0.054579	0.161858
ENSG00000137309	HMGA1	-1.0509	1.5715e-16	1.45761e-14
ENSG00000086289	EPDR1	0.00850691	0.96174	0.981789
ENSG00000067191	CACNB1	-1.05041	0.0223027	0.0836709
ENSG00000104892	KLC3	-1.04933	0.00489298	0.0252959
ENSG00000086504	MRPL28	0.102007	0.547846	0.735445
ENSG00000114686	MRPL3	-1.04893	5.1409e-13	2.84427e-11
ENSG00000135842	FAM129A	-1.0474	8.64414e-09	2.28693e-07
ENSG00000260246	AC000032.1	-1.04663	0.0778005	0.208935
ENSG00000086570	FAT2	0.249075	0.724934	0.852723
ENSG00000088305	DNMT3B	-1.04603	0.000420948	0.00325209
ENSG00000086598	TMED2	-0.0257255	0.824293	0.909914
ENSG00000132780	NASP	-1.04558	7.22161e-09	1.9465e-07
ENSG00000086666	ZFAND6	-0.0869341	0.560608	0.745725
ENSG00000257038	AP002761.3	-1.04511	0.314337	0.53107
ENSG00000121053	EPX	-1.04401	1.75512e-06	2.67906e-05
ENSG00000109685	NSD2	-1.04346	1.02172e-16	9.70512e-15
ENSG00000231329	AL031772.1	-1.04334	0.202333	0.401408
ENSG00000136828	RALGPS1	-1.04258	0.158732	0.341691
ENSG00000087008	ACOX3	-0.00980822	0.96632	0.983984
ENSG00000087053	MTMR2	-0.0572693	0.765698	0.877245
ENSG00000111196	MAGOHB	-1.0425	2.86743e-05	0.00031863
ENSG00000198435	NRARP	-1.04231	0.0212526	0.0805556
ENSG00000274828	AC068473.5	-1.04196	0.0330866	0.112172
ENSG00000162069	BICDL2	-1.04177	0.0301604	0.104521
ENSG00000213683	AC002056.1	-1.04168	0.356263	0.573512
ENSG00000237149	ZNF503-AS2	-1.04045	0.0937571	0.238773
ENSG00000058056	USP13	-1.03953	0.00495432	0.0255293
ENSG00000283787	AC051649.2	-1.03778	3.35816e-09	9.87901e-08
ENSG00000157470	FAM81A	-1.0367	0.208135	0.408245
ENSG00000172878	METAP1D	-1.03663	0.00687612	0.0331771
ENSG00000112667	DNPH1	-1.03543	3.95735e-06	5.57636e-05
ENSG00000230565	ZNF32-AS2	-1.03372	0.0192864	0.0747927
ENSG00000198270	TMEM116	-1.03333	0.0357636	0.118346
ENSG00000177542	SLC25A22	-1.03312	1.64136e-05	0.00019474
ENSG00000128886	ELL3	-1.03259	0.292257	0.50842
ENSG00000087266	SH3BP2	0.0620515	0.729863	0.855291
ENSG00000274904	AC093512.1	-1.03252	2.46148e-06	3.64781e-05
ENSG00000197451	HNRNPAB	-1.03221	1.0218e-11	4.75271e-10
ENSG00000121057	AKAP1	-1.0322	1.86599e-06	2.82641e-05
ENSG00000087301	TXNDC16	-0.254019	0.527677	0.720844
ENSG00000115504	EHBP1	-1.0314	3.12529e-05	0.000342933
ENSG00000242539	AC007620.2	-1.03064	5.32082e-05	0.000545505
ENSG00000229867	STEAP3-AS1	-1.03061	0.0961971	0.242733
ENSG00000160117	ANKLE1	-1.03011	1.41986e-06	2.22107e-05
ENSG00000165650	PDZD8	-1.02958	2.20662e-08	5.39442e-07
ENSG00000136315	AL355922.1	-1.0287	1.97439e-13	1.166e-11
ENSG00000087502	ERGIC2	-0.00468814	0.978866	0.989788
ENSG00000163220	S100A9	-1.02811	5.86746e-09	1.60901e-07
ENSG00000145331	TRMT10A	-1.02804	0.00650855	0.031773
ENSG00000130816	DNMT1	-1.02785	6.71319e-11	2.69347e-09
ENSG00000101916	TLR8	-1.02705	0.213723	0.415024
ENSG00000105426	PTPRS	-1.0262	0.19125	0.387154
ENSG00000099194	SCD	-1.02577	2.69635e-06	3.97346e-05
ENSG00000151466	SCLT1	-1.02575	1.14239e-06	1.83434e-05
ENSG00000185269	NOTUM	-1.02537	0.171657	0.359264
ENSG00000043591	ADRB1	-1.02527	0.249169	0.459187
ENSG00000100297	MCM5	-1.02512	3.69051e-14	2.49751e-12
ENSG00000087299	L2HGDH	-1.02377	1.04652e-06	1.69944e-05
ENSG00000119943	PYROXD2	-1.02264	0.000845928	0.00587862
ENSG00000088256	GNA11	0.129791	0.540917	0.72987
ENSG00000106484	MEST	-1.02233	0.224543	0.428643
ENSG00000226121	AC009487.2	-1.02173	0.146147	0.323888
ENSG00000272540	AL662797.1	-1.02081	2.07016e-08	5.10328e-07
ENSG00000088356	PDRG1	-0.123076	0.54892	0.736258
ENSG00000174705	SH3PXD2B	-1.02068	0.149893	0.329134
ENSG00000065457	ADAT1	-1.01986	6.06592e-05	0.000609608
ENSG00000088538	DOCK3	0.230475	0.825958	0.910685
ENSG00000273466	AC012510.1	-1.01965	0.0163204	0.0655976
ENSG00000136518	ACTL6A	-1.01888	1.01414e-08	2.64286e-07
ENSG00000181804	SLC9A9	-1.01871	0.319662	0.536272
ENSG00000164181	ELOVL7	-1.0187	0.284623	0.50016
ENSG00000088808	PPP1R13B	0.7032	0.522934	0.717884
ENSG00000100401	RANGAP1	-1.01844	1.76511e-10	6.48772e-09
ENSG00000004777	ARHGAP33	-1.01705	0.0332462	0.112519
ENSG00000169570	DTWD2	-1.01612	0.00458964	0.0240111
ENSG00000226754	AL606760.1	-1.01599	0.0911062	0.233815
ENSG00000133739	LRRCC1	-1.01541	0.00194709	0.0118084
ENSG00000245311	ARNTL2-AS1	-1.01475	0.167672	0.353693
ENSG00000172339	ALG14	-1.01446	0.0474538	0.145972
ENSG00000196230	TUBB	-1.01432	5.76396e-11	2.3364e-09
ENSG00000263264	AC119396.1	-1.01382	0.104984	0.257848
ENSG00000269106	AC012313.7	-1.01227	0.275045	0.489715
ENSG00000013573	DDX11	-1.01211	0.000153684	0.00137453
ENSG00000109089	CDR2L	-1.01179	0.254471	0.465488
ENSG00000157193	LRP8	-1.01062	6.15283e-07	1.05926e-05
ENSG00000097021	ACOT7	-1.01012	2.95911e-06	4.30833e-05
ENSG00000204394	VARS	-1.00972	6.75209e-15	4.97509e-13
ENSG00000235381	AL596202.1	-1.00958	0.0791551	0.211295
ENSG00000147166	ITGB1BP2	-1.00931	0.228427	0.433851
ENSG00000089022	MAPKAPK5	-0.124684	0.547852	0.735445
ENSG00000251692	PTX4	-1.00867	0.0829721	0.218524
ENSG00000245322	AC097460.1	-1.00854	2.04911e-07	3.99387e-06
ENSG00000089050	RBBP9	0.0940205	0.724783	0.852708
ENSG00000128951	DUT	-1.00832	3.85733e-13	2.17695e-11
ENSG00000089057	SLC23A2	-0.0112868	0.952862	0.977218
ENSG00000089060	SLC8B1	0.081687	0.577766	0.757291
ENSG00000116133	DHCR24	-1.00775	6.64799e-09	1.80422e-07
ENSG00000089091	DZANK1	-0.0128291	0.976828	0.989204
ENSG00000165732	DDX21	-1.00753	1.72404e-10	6.35156e-09
ENSG00000198157	HMGN5	-1.00615	0.000484605	0.00366839
ENSG00000089127	OAS1	0.410706	0.631644	0.79462
ENSG00000204253	HNRNPCP2	-1.00603	3.98209e-07	7.16777e-06
ENSG00000113389	NPR3	-1.00567	0.0137571	0.0578767
ENSG00000253806	AC108002.2	-1.00534	0.0976392	0.245038
ENSG00000089163	SIRT4	-0.338418	0.758759	0.873357
ENSG00000038210	PI4K2B	-1.00508	4.43435e-05	0.000463359
ENSG00000246560	AC018797.2	-1.00389	0.330593	0.547448
ENSG00000130595	TNNT3	-1.00351	0.0241642	0.0889819
ENSG00000088882	CPXM1	-1.00345	4.44135e-10	1.51583e-08
ENSG00000089234	BRAP	0.0327092	0.854707	0.926082
ENSG00000267751	AC009005.1	-1.00344	0.000162469	0.00144246
ENSG00000137460	FHDC1	-1.00311	0.11108	0.268472
ENSG00000128059	PPAT	-1.00276	1.19992e-05	0.000146783
ENSG00000131462	TUBG1	-1.00261	3.27622e-06	4.70916e-05
ENSG00000177721	ANXA2R	-1.00225	0.203094	0.40231
ENSG00000162062	TEDC2	-1.00202	0.000699899	0.00500954
ENSG00000163705	FANCD2OS	-1.00159	0.0167557	0.0670059
ENSG00000155966	AFF2	-1.00127	0.000312089	0.00251843
ENSG00000158321	AUTS2	-1.00104	0.0551091	0.16291
ENSG00000205978	NYNRIN	-1.00056	0.0750154	0.203763
ENSG00000089639	GMIP	0.0664947	0.599487	0.772617
ENSG00000116353	MECR	-0.999816	7.23654e-05	0.000713161
ENSG00000229619	MBNL1-AS1	-0.999741	0.0593838	0.17187
ENSG00000175832	ETV4	-0.998856	0.0416937	0.132551
ENSG00000089693	MLF2	-0.0632479	0.645376	0.803515
ENSG00000089723	OTUB2	-0.114482	0.862411	0.929905
ENSG00000258908	AL355075.3	-0.998803	9.91543e-10	3.20603e-08
ENSG00000089775	ZBTB25	-0.128625	0.551429	0.738318
ENSG00000196408	NOXO1	-0.998567	0.0845991	0.221404
ENSG00000089820	ARHGAP4	-0.0487102	0.773042	0.881687
ENSG00000132646	PCNA	-0.997466	2.94218e-07	5.45792e-06
ENSG00000094804	CDC6	-0.997162	0.000107618	0.00101007
ENSG00000255282	WTAPP1	-0.996923	0.305426	0.521264
ENSG00000089916	GPATCH2L	-0.000902978	0.995988	0.998453
ENSG00000012171	SEMA3B	-0.99666	0.354254	0.571738
ENSG00000171617	ENC1	-0.996582	2.78921e-07	5.24199e-06
ENSG00000127586	CHTF18	-0.995749	0.000153449	0.00137321
ENSG00000256591	AP003108.2	-0.995393	0.02361	0.087452
ENSG00000090060	PAPOLA	0.0636119	0.606119	0.776889
ENSG00000178531	CTXN1	-0.995114	0.271863	0.48586
ENSG00000103021	CCDC113	-0.994385	0.156225	0.33828
ENSG00000125901	MRPS26	-0.993824	1.43463e-05	0.000172946
ENSG00000272267	AC021242.3	-0.993556	0.138745	0.312804
ENSG00000090263	MRPS33	-0.0902856	0.583551	0.761449
ENSG00000090266	NDUFB2	-0.10013	0.502076	0.701215
ENSG00000005073	HOXA11	-0.992369	0.00077211	0.00545103
ENSG00000090316	MAEA	0.0756065	0.569037	0.751347
ENSG00000149054	ZNF215	-0.992053	0.353201	0.570563
ENSG00000090372	STRN4	0.0269533	0.843035	0.919253
ENSG00000134940	ACRV1	-0.991629	0.368993	0.585394
ENSG00000149929	HIRIP3	-0.99047	2.31164e-08	5.59907e-07
ENSG00000227050	AL512288.1	-0.990246	0.00209418	0.0125699
ENSG00000103260	METRN	-0.990162	5.61469e-07	9.77179e-06
ENSG00000128602	SMO	-0.99001	0.157213	0.33986
ENSG00000090487	SPG21	-0.048165	0.72061	0.850047
ENSG00000090520	DNAJB11	0.00012995	0.999396	0.999586
ENSG00000147536	GINS4	-0.989815	6.16822e-05	0.000619494
ENSG00000266338	NBPF15	-0.989471	0.200215	0.39861
ENSG00000090612	ZNF268	-0.0263257	0.915693	0.958047
ENSG00000151611	MMAA	-0.989445	0.00769215	0.0363797
ENSG00000090621	PABPC4	-0.0023536	0.985319	0.992882
ENSG00000166451	CENPN	-0.988587	7.67467e-07	1.29151e-05
ENSG00000130147	SH3BP4	-0.988143	0.0150278	0.0618344
ENSG00000275464	FP565260.1	-0.988052	0.0092153	0.0421913
ENSG00000090776	EFNB1	0.0949128	0.762332	0.875159
ENSG00000090857	PDPR	-0.0277908	0.879503	0.938348
ENSG00000138796	HADH	-0.987203	8.4403e-09	2.24808e-07
ENSG00000144120	TMEM177	-0.987075	0.0118186	0.0512669
ENSG00000227827	AC138969.2	-0.986401	0.143012	0.319136
ENSG00000090905	TNRC6A	0.0639144	0.755082	0.87145
ENSG00000109339	MAPK10	-0.986137	0.443276	0.652012
ENSG00000134321	RSAD2	-0.986119	0.113942	0.273418
ENSG00000213694	S1PR3	-0.985608	0.236149	0.443795
ENSG00000090989	EXOC1	0.0914383	0.642426	0.801977
ENSG00000242261	AC018635.1	-0.985006	0.0945253	0.239876
ENSG00000079819	EPB41L2	-0.984637	0.000450343	0.00344876
ENSG00000080603	SRCAP	-0.984383	0.0174514	0.0690922
ENSG00000136108	CKAP2	-0.983725	1.91675e-08	4.7521e-07
ENSG00000247728	AC091057.1	-0.983215	0.172043	0.359699
ENSG00000280079	AC011447.7	-0.981655	0.175654	0.365012
ENSG00000196517	SLC6A9	-0.981293	0.0324825	0.110719
ENSG00000154928	EPHB1	-0.981232	0.230159	0.436144
ENSG00000106477	CEP41	-0.980364	0.000513672	0.00385694
ENSG00000282458	WASH5P	-0.980067	0.248067	0.458024
ENSG00000155761	SPAG17	-0.979928	0.0576512	0.168342
ENSG00000184785	SMIM10	-0.979517	7.20144e-05	0.000710146
ENSG00000256269	HMBS	-0.97923	6.32222e-05	0.000632944
ENSG00000277501	AC243571.2	-0.978907	0.299395	0.515491
ENSG00000006625	GGCT	-0.977906	0.00300355	0.0169385
ENSG00000091542	ALKBH5	-0.0823725	0.528752	0.721662
ENSG00000176236	C10orf111	-0.977627	0.32999	0.546621
ENSG00000074582	BCS1L	-0.976524	3.72326e-05	0.000396678
ENSG00000184164	CRELD2	-0.976038	8.97059e-06	0.00011444
ENSG00000276791	AC092117.1	-0.975617	0.21713	0.419211
ENSG00000091879	ANGPT2	-0.177021	0.773189	0.881688
ENSG00000130347	RTN4IP1	-0.974529	0.0139924	0.0585936
ENSG00000142173	COL6A2	-0.974389	0.365012	0.581775
ENSG00000143797	MBOAT2	-0.974374	0.00630588	0.0310044
ENSG00000092020	PPP2R3C	0.0622747	0.706451	0.840314
ENSG00000168078	PBK	-0.974249	0.0965498	0.24335
ENSG00000092051	JPH4	-0.352557	0.749411	0.867664
ENSG00000278619	MRM1	-0.974144	0.00015418	0.0013774
ENSG00000246203	AL353807.3	-0.974122	0.0264225	0.0948845
ENSG00000101868	POLA1	-0.97379	3.58713e-05	0.000385362
ENSG00000092098	RNF31	0.0632514	0.836621	0.916227
ENSG00000092108	SCFD1	0.0567308	0.730024	0.855291
ENSG00000243710	CFAP57	-0.973534	0.00125491	0.00816311
ENSG00000092148	HECTD1	0.135665	0.520727	0.716074
ENSG00000178726	THBD	-0.973139	0.132955	0.304051
ENSG00000270096	AC078795.2	-0.973022	0.231658	0.438179
ENSG00000092203	TOX4	0.0181488	0.882368	0.939601
ENSG00000155755	TMEM237	-0.972245	0.000951646	0.00648428
ENSG00000010292	NCAPD2	-0.971532	2.7692e-13	1.58781e-11
ENSG00000152455	SUV39H2	-0.970803	4.46801e-05	0.000466258
ENSG00000235111	Z97192.3	-0.970297	0.296836	0.513045
ENSG00000073905	VDAC1P1	-0.970216	0.0858391	0.223832
ENSG00000266074	BAHCC1	-0.969963	9.12947e-09	2.39922e-07
ENSG00000188211	NCR3LG1	-0.96913	0.0572727	0.167547
ENSG00000198848	CES1	-0.968063	0.0941128	0.239119
ENSG00000156787	TBC1D31	-0.967388	0.000833926	0.00581462
ENSG00000196754	S100A2	-0.966623	0.384979	0.599921
ENSG00000119866	BCL11A	-0.966314	0.000165271	0.00146076
ENSG00000106462	EZH2	-0.966015	8.40088e-05	0.000812171
ENSG00000133119	RFC3	-0.965789	0.000226232	0.00191375
ENSG00000247626	MARS2	-0.965746	0.00213928	0.0128016
ENSG00000100522	GNPNAT1	-0.9654	7.32605e-05	0.000720631
ENSG00000164038	SLC9B2	-0.965083	0.00554266	0.0279055
ENSG00000189007	ADAT2	-0.964886	0.00197161	0.0119295
ENSG00000092964	DPYSL2	0.128436	0.716098	0.847323
ENSG00000035664	DAPK2	-0.964419	0.0182125	0.0714778
ENSG00000161800	RACGAP1	-0.96406	3.58242e-08	8.36852e-07
ENSG00000226526	AL049569.1	-0.963587	0.0617396	0.177195
ENSG00000173198	CYSLTR1	-0.963443	0.000349547	0.00277806
ENSG00000130204	TOMM40	-0.962789	8.42842e-10	2.75725e-08
ENSG00000259943	AL050341.2	-0.962719	0.09388	0.238874
ENSG00000159403	C1R	-0.962227	0.167128	0.352896
ENSG00000169385	RNASE2	-0.961111	3.86948e-17	4.01407e-15
ENSG00000215788	TNFRSF25	-0.96047	0.0620578	0.177801
ENSG00000274386	TMEM269	-0.960352	0.154863	0.336394
ENSG00000272509	AC087752.4	-0.958651	0.237161	0.445133
ENSG00000094841	UPRT	0.151442	0.559052	0.744387
ENSG00000087842	PIR	-0.958133	0.0141692	0.0591686
ENSG00000149115	TNKS1BP1	-0.958093	7.72653e-05	0.000755605
ENSG00000164338	UTP15	-0.957573	4.90216e-05	0.000506204
ENSG00000094975	SUCO	-0.0203761	0.901579	0.949957
ENSG00000111203	ITFG2	-0.957536	2.70852e-06	3.98767e-05
ENSG00000117525	F3	-0.955711	0.0195579	0.0754745
ENSG00000095059	DHPS	0.00388526	0.978665	0.989788
ENSG00000166197	NOLC1	-0.955253	5.51931e-09	1.52148e-07
ENSG00000269534	AC011466.3	-0.954664	5.68544e-05	0.000577629
ENSG00000256813	AP000777.3	-0.953664	0.00838196	0.0389298
ENSG00000095261	PSMD5	0.0760024	0.692736	0.831458
ENSG00000131018	SYNE1	-0.952644	0.00490496	0.0253399
ENSG00000262115	AC027601.2	-0.952247	0.0967241	0.243447
ENSG00000238280	AL133417.1	-0.952109	0.0348519	0.116257
ENSG00000095370	SH2D3C	-0.0473096	0.756837	0.872212
ENSG00000095380	NANS	-0.0919189	0.611506	0.780684
ENSG00000263585	AC145207.4	-0.95104	0.00562634	0.0282356
ENSG00000095485	CWF19L1	-0.0117945	0.941573	0.972038
ENSG00000273478	AC099676.1	-0.950612	0.000409672	0.00317586
ENSG00000095564	BTAF1	0.00178504	0.993931	0.997473
ENSG00000188229	TUBB4B	-0.950126	2.86427e-08	6.83264e-07
ENSG00000124406	ATP8A1	-0.949818	0.00202703	0.0122273
ENSG00000095627	TDRD1	-0.0043243	0.995696	0.998419
ENSG00000116127	ALMS1	-0.948634	0.000282645	0.00231279
ENSG00000151835	SACS	-0.948342	0.000245534	0.00205716
ENSG00000095787	WAC	0.0585375	0.61487	0.782996
ENSG00000156026	MCU	-0.947998	1.20197e-06	1.91441e-05
ENSG00000266066	POLRMTP1	-0.947987	0.279749	0.495242
ENSG00000272711	AC019069.1	-0.947586	0.0092243	0.042208
ENSG00000151773	CCDC122	-0.947237	0.276059	0.490906
ENSG00000095951	HIVEP1	0.192173	0.538418	0.728111
ENSG00000280374	AC019080.5	-0.946918	0.274961	0.489621
ENSG00000174721	FGFBP3	-0.94603	0.022383	0.0839123
ENSG00000196357	ZNF565	-0.945971	0.0980568	0.245746
ENSG00000143344	RGL1	-0.945931	0.399103	0.614017
ENSG00000105281	SLC1A5	-0.945142	6.68607e-08	1.4807e-06
ENSG00000277161	PIGW	-0.945022	0.000563853	0.00416628
ENSG00000104522	TSTA3	-0.944141	5.82696e-07	1.00856e-05
ENSG00000096401	CDC5L	-0.038694	0.817229	0.907166
ENSG00000096433	ITPR3	-0.0321632	0.949345	0.975635
ENSG00000112699	GMDS	-0.944138	6.88318e-08	1.52008e-06
ENSG00000111696	NT5DC3	-0.944102	1.5823e-06	2.44127e-05
ENSG00000171960	PPIH	-0.943868	3.34564e-07	6.10579e-06
ENSG00000094916	CBX5	-0.942949	1.21444e-10	4.6479e-09
ENSG00000096968	JAK2	0.162657	0.502502	0.701438
ENSG00000096996	IL12RB1	-0.0370973	0.897766	0.948284
ENSG00000123416	TUBA1B	-0.94266	8.81122e-10	2.87056e-08
ENSG00000185379	RAD51D	-0.942629	2.39694e-06	3.57568e-05
ENSG00000097033	SH3GLB1	-0.027945	0.841828	0.918891
ENSG00000159674	SPON2	-0.942298	0.000194423	0.00168443
ENSG00000212994	RPS26P6	-0.941895	0.230976	0.43727
ENSG00000162241	SLC25A45	-0.94165	0.00586954	0.029279
ENSG00000267102	AC060766.1	-0.940707	0.434741	0.645535
ENSG00000239900	ADSL	-0.939622	0.00448418	0.0235499
ENSG00000099219	ERMP1	-0.133038	0.546957	0.734883
ENSG00000274021	AC024909.3	-0.939592	0.0019707	0.0119286
ENSG00000261236	BOP1	-0.939539	2.44707e-09	7.40604e-08
ENSG00000259049	AL139317.3	-0.938009	5.41416e-05	0.000553994
ENSG00000272030	AL162258.2	-0.937325	0.349183	0.566602
ENSG00000226180	AC010536.1	-0.936739	0.316826	0.533361
ENSG00000136153	LMO7	-0.935712	0.044852	0.140045
ENSG00000259803	SLC22A31	-0.935599	0.275077	0.489716
ENSG00000239306	RBM14	-0.934368	9.01517e-10	2.93095e-08
ENSG00000132874	SLC14A2	-0.933965	0.274933	0.489621
ENSG00000160957	RECQL4	-0.933625	0.0203482	0.077922
ENSG00000253174	AC009630.2	-0.933274	0.00386708	0.020954
ENSG00000203780	FANK1	-0.933042	0.179108	0.370275
ENSG00000099364	FBXL19	-0.0846924	0.541195	0.730114
ENSG00000105851	PIK3CG	-0.932842	0.00167692	0.0104209
ENSG00000111644	ACRBP	-0.931997	0.00896208	0.0412114
ENSG00000175602	CCDC85B	-0.931088	2.76156e-07	5.21487e-06
ENSG00000099385	BCL7C	-0.012678	0.940884	0.972038
ENSG00000099622	CIRBP	0.0406215	0.801223	0.898186
ENSG00000162073	PAQR4	-0.93027	2.37744e-07	4.57163e-06
ENSG00000101444	AHCY	-0.929433	1.74962e-11	7.79382e-10
ENSG00000144736	SHQ1	-0.929417	4.33564e-06	6.01799e-05
ENSG00000184992	BRI3BP	-0.929079	1.15281e-08	2.97503e-07
ENSG00000100033	PRODH	-0.929026	5.39242e-05	0.000552128
ENSG00000099795	NDUFB7	0.106188	0.560646	0.745725
ENSG00000099797	TECR	-0.0637905	0.692013	0.831048
ENSG00000247033	AC099508.1	-0.92893	4.14959e-05	0.000435624
ENSG00000077684	JADE1	-0.92821	2.98945e-06	4.34048e-05
ENSG00000051596	THOC3	-0.927975	1.15062e-05	0.000141853
ENSG00000168924	LETM1	-0.927839	2.06194e-10	7.47418e-09
ENSG00000138722	MMRN1	-0.927832	0.153249	0.334214
ENSG00000115850	LCT	-0.926664	0.0837784	0.219913
ENSG00000168000	BSCL2	-0.924278	0.117349	0.278458
ENSG00000099840	IZUMO4	-0.426677	0.518878	0.715088
ENSG00000099849	RASSF7	0.135165	0.525139	0.719378
ENSG00000152990	ADGRA3	-0.924013	0.000398539	0.00310636
ENSG00000283480	AL512380.2	-0.924007	0.0407944	0.13037
ENSG00000213300	HNRNPA3P6	-0.923709	0.228208	0.433488
ENSG00000099875	MKNK2	-0.0830758	0.563508	0.748023
ENSG00000155380	SLC16A1	-0.923146	0.00656003	0.0319524
ENSG00000099899	TRMT2A	-0.115412	0.557024	0.742737
ENSG00000240567	LINC02067	-0.922998	0.232228	0.438855
ENSG00000186638	KIF24	-0.921915	7.77134e-05	0.000758752
ENSG00000099910	KLHL22	0.132695	0.55105	0.73823
ENSG00000099917	MED15	0.0572033	0.652118	0.807459
ENSG00000099940	SNAP29	0.102813	0.54748	0.735321
ENSG00000107957	SH3PXD2A	-0.92156	3.32734e-05	0.000361831
ENSG00000099949	LZTR1	-0.0259047	0.894444	0.94655
ENSG00000155542	SETD9	-0.92132	0.00612974	0.030337
ENSG00000164032	H2AFZ	-0.92069	1.81765e-09	5.58689e-08
ENSG00000099957	P2RX6	0.565491	0.555872	0.742041
ENSG00000261840	AC093249.6	-0.920086	0.131805	0.302387
ENSG00000078589	P2RY10	-0.919711	0.289676	0.505445
ENSG00000273080	AC009309.1	-0.9196	0.3777	0.593374
ENSG00000183742	MACC1	-0.919437	0.000425231	0.00327762
ENSG00000138758	SEPT11	-0.91868	9.41499e-08	2.01159e-06
ENSG00000151474	FRMD4A	-0.918437	0.0113248	0.0495971
ENSG00000143401	ANP32E	-0.918381	3.03875e-12	1.51152e-10
ENSG00000167984	NLRC3	-0.917894	0.000142421	0.00129211
ENSG00000164087	POC1A	-0.917303	6.37276e-05	0.000637195
ENSG00000148840	PPRC1	-0.917169	1.39651e-07	2.84373e-06
ENSG00000100014	SPECC1L	0.00392044	0.982857	0.991598
ENSG00000155792	DEPTOR	-0.917091	0.00169503	0.0105184
ENSG00000100024	UPB1	-0.506164	0.574588	0.755276
ENSG00000100027	YPEL1	-0.10973	0.615546	0.783495
ENSG00000236698	EIF1AXP1	-0.916562	0.0276045	0.0979231
ENSG00000088836	SLC4A11	-0.916316	0.0583863	0.169702
ENSG00000245330	AP005717.1	-0.914881	0.402009	0.616503
ENSG00000100031	GGT1	0.141416	0.564032	0.748043
ENSG00000139998	RAB15	-0.91429	0.0236639	0.087569
ENSG00000105369	CD79A	-0.913974	0.0393724	0.12714
ENSG00000100036	SLC35E4	0.227897	0.540683	0.72987
ENSG00000148362	PAXX	-0.913834	0.000459264	0.00350347
ENSG00000256967	AC018653.3	-0.912825	0.229613	0.435633
ENSG00000258824	AL122035.1	-0.912645	0.2452	0.454205
ENSG00000100058	CRYBB2P1	-0.0911348	0.723117	0.851857
ENSG00000134146	DPH6	-0.912184	0.0284761	0.100136
ENSG00000100065	CARD10	-0.178676	0.77537	0.882937
ENSG00000180938	ZNF572	-0.912047	0.103146	0.254405
ENSG00000100075	SLC25A1	-0.0857169	0.546229	0.734453
ENSG00000226243	RPL37AP1	-0.911783	0.0378075	0.123452
ENSG00000069275	NUCKS1	-0.910948	2.21112e-09	6.7437e-08
ENSG00000163251	FZD5	-0.910877	0.0676154	0.188768
ENSG00000100092	SH3BP1	0.0652411	0.639145	0.799851
ENSG00000185238	PRMT3	-0.910787	0.000866365	0.00601005
ENSG00000177602	HASPIN	-0.910704	0.000222891	0.00188751
ENSG00000145365	TIFA	-0.910435	0.00246823	0.0144519
ENSG00000124171	PARD6B	-0.91041	0.159218	0.342223
ENSG00000184445	KNTC1	-0.909751	0.0001438	0.00130111
ENSG00000100106	TRIOBP	0.0928702	0.533923	0.725386
ENSG00000258429	PDF	-0.909149	0.00483557	0.0250319
ENSG00000151693	ASAP2	-0.908219	0.0381198	0.124134
ENSG00000254814	AP003031.1	-0.907875	0.300186	0.516072
ENSG00000162437	RAVER2	-0.907681	0.00297389	0.0168133
ENSG00000100129	EIF3L	-0.0366068	0.824529	0.909914
ENSG00000177640	CASC2	-0.907452	0.285523	0.501043
ENSG00000177192	PUS1	-0.906746	3.39554e-06	4.85852e-05
ENSG00000163428	LRRC58	-0.904813	4.87018e-07	8.61875e-06
ENSG00000100150	DEPDC5	0.0695469	0.727875	0.85443
ENSG00000173145	NOC3L	-0.903776	0.000534832	0.00398734
ENSG00000099901	RANBP1	-0.903065	9.95831e-09	2.59971e-07
ENSG00000130592	LSP1	-0.903036	1.0842e-06	1.75339e-05
ENSG00000164066	INTU	-0.901976	0.325534	0.542073
ENSG00000100197	CYP2D6	-0.206375	0.82819	0.911975
ENSG00000100201	DDX17	0.0705005	0.600905	0.773412
ENSG00000171462	DLK2	-0.901759	0.195414	0.39259
ENSG00000100207	TCF20	-0.0289955	0.87384	0.935851
ENSG00000163661	PTX3	-0.901341	0.000464129	0.00353375
ENSG00000100211	CBY1	-0.160587	0.52723	0.720743
ENSG00000164402	SEPT8	-0.901205	0.0185351	0.0724857
ENSG00000110092	CCND1	-0.9011	0.270081	0.483991
ENSG00000063660	GPC1	-0.901079	0.0025049	0.014638
ENSG00000255959	AP000777.2	-0.899962	0.00753104	0.0357249
ENSG00000100225	FBXO7	0.0806336	0.516919	0.713871
ENSG00000267783	AC022098.3	-0.89995	0.326827	0.54315
ENSG00000233045	AC097523.1	-0.899911	0.302046	0.51768
ENSG00000253102	AC004707.1	-0.898842	0.00024453	0.00204984
ENSG00000271335	AL117336.3	-0.897948	0.31023	0.526753
ENSG00000100241	SBF1	0.0144209	0.913772	0.956921
ENSG00000143179	UCK2	-0.897858	1.54956e-08	3.90937e-07
ENSG00000100243	CYB5R3	0.0366843	0.776298	0.883357
ENSG00000260349	AC087190.2	-0.897392	0.0119657	0.0518337
ENSG00000075131	TIPIN	-0.897008	0.00170138	0.0105536
ENSG00000258017	AC011603.2	-0.896929	1.09439e-08	2.83355e-07
ENSG00000154310	TNIK	-0.89679	8.85908e-05	0.000848148
ENSG00000159399	HK2	-0.896719	1.1694e-06	1.86631e-05
ENSG00000141349	G6PC3	-0.896568	5.38501e-06	7.276e-05
ENSG00000004399	PLXND1	-0.896555	2.81281e-11	1.20196e-09
ENSG00000244158	Z84488.1	-0.896328	0.0938202	0.238799
ENSG00000110660	SLC35F2	-0.896281	5.97026e-05	0.000602297
ENSG00000196839	ADA	-0.896026	3.70381e-10	1.27515e-08
ENSG00000106628	POLD2	-0.895892	2.42274e-08	5.8502e-07
ENSG00000100292	HMOX1	0.131104	0.501503	0.7011
ENSG00000197150	ABCB8	-0.893952	2.36948e-05	0.000269957
ENSG00000067057	PFKP	-0.893876	8.55229e-09	2.27025e-07
ENSG00000100116	GCAT	-0.893709	5.40783e-06	7.30058e-05
ENSG00000197561	ELANE	-0.89368	1.4782e-14	1.03592e-12
ENSG00000187325	TAF9B	-0.893464	0.000543994	0.00404805
ENSG00000103121	CMC2	-0.893393	7.19748e-06	9.37158e-05
ENSG00000078596	ITM2A	-0.893268	0.00113503	0.00748212
ENSG00000102230	PCYT1B	-0.893143	0.286464	0.501773
ENSG00000163913	IFT122	-0.892469	2.38148e-06	3.55598e-05
ENSG00000100316	RPL3	-0.08045	0.505697	0.704402
ENSG00000100319	ZMAT5	0.0721917	0.737347	0.859904
ENSG00000266378	AC005224.3	-0.891882	0.499005	0.698942
ENSG00000211592	IGKC	-0.891713	0.174745	0.363553
ENSG00000100324	TAB1	-0.0584353	0.720988	0.850111
ENSG00000100325	ASCC2	0.0361603	0.809818	0.902992
ENSG00000176055	MBLAC2	-0.890956	0.00790535	0.0371429
ENSG00000271970	AL355802.3	-0.890718	0.230159	0.436144
ENSG00000215302	AC127502.1	-0.890282	0.0557049	0.164205
ENSG00000084207	GSTP1	-0.890016	3.64466e-09	1.06621e-07
ENSG00000100345	MYH9	-0.0108815	0.945672	0.973772
ENSG00000143537	ADAM15	-0.888386	1.1442e-11	5.26e-10
ENSG00000100348	TXN2	-0.0402401	0.777094	0.883433
ENSG00000217094	PPIAP31	-0.88836	0.184614	0.377903
ENSG00000143195	ILDR2	-0.888172	0.249233	0.459208
ENSG00000051825	MPHOSPH9	-0.888132	0.00242941	0.0142697
ENSG00000149485	FADS1	-0.887749	2.84662e-07	5.32449e-06
ENSG00000125384	PTGER2	-0.884742	0.000904415	0.00623015
ENSG00000100360	IFT27	-0.054822	0.774605	0.882321
ENSG00000100364	KIAA0930	0.0640199	0.697144	0.834477
ENSG00000100365	NCF4	0.041673	0.764365	0.876482
ENSG00000153574	RPIA	-0.884247	3.90249e-09	1.127e-07
ENSG00000239883	PARGP1	-0.883095	0.342278	0.559217
ENSG00000100376	FAM118A	-0.148573	0.616944	0.784236
ENSG00000100379	KCTD17	0.00243259	0.994033	0.99751
ENSG00000197785	ATAD3A	-0.883017	2.32832e-05	0.000266035
ENSG00000198554	WDHD1	-0.882696	0.00636269	0.0312545
ENSG00000160201	U2AF1	-0.882179	0.0376937	0.123237
ENSG00000129480	DTD2	-0.882075	0.00369151	0.0201411
ENSG00000213740	SERBP1P1	-0.881685	0.00465665	0.0242935
ENSG00000178295	GEN1	-0.881279	2.7025e-05	0.000302434
ENSG00000253961	AC009563.1	-0.880995	0.155881	0.338046
ENSG00000134461	ANKRD16	-0.880712	0.0110952	0.0488138
ENSG00000078399	HOXA9	-0.880157	1.24046e-06	1.96661e-05
ENSG00000196860	TOMM20L	-0.880157	0.232021	0.438722
ENSG00000067992	PDK3	-0.87916	9.78401e-05	0.000928804
ENSG00000079739	PGM1	-0.879005	1.06491e-07	2.22659e-06
ENSG00000125459	MSTO1	-0.878528	0.00025602	0.00212918
ENSG00000239672	NME1	-0.878271	0.000623591	0.0045417
ENSG00000232729	AC211433.1	-0.877955	0.0193729	0.0750517
ENSG00000132382	MYBBP1A	-0.877886	1.26076e-07	2.5885e-06
ENSG00000144867	SRPRB	-0.876451	3.25642e-06	4.68497e-05
ENSG00000101911	PRPS2	-0.875225	4.87344e-08	1.11207e-06
ENSG00000100429	HDAC10	-0.233707	0.773361	0.881784
ENSG00000095002	MSH2	-0.874875	0.00031359	0.00252796
ENSG00000162885	B3GALNT2	-0.872827	0.0491936	0.150036
ENSG00000140836	ZFHX3	-0.872783	0.0668459	0.187116
ENSG00000254760	AC008750.1	-0.872553	0.202966	0.402208
ENSG00000198734	F5	-0.871812	0.0279519	0.0988439
ENSG00000134569	LRP4	-0.870921	0.195599	0.392692
ENSG00000214425	LRRC37A4P	-0.869436	0.0619431	0.17765
ENSG00000100473	COCH	-0.0364264	0.858016	0.927483
ENSG00000100890	KIAA0391	-0.869146	0.023837	0.0880268
ENSG00000160949	TONSL	-0.868936	0.0003563	0.00282538
ENSG00000100483	VCPKMT	0.0424688	0.894216	0.946507
ENSG00000203778	FAM229B	-0.868809	0.0798402	0.212571
ENSG00000100490	CDKL1	0.114711	0.795399	0.894164
ENSG00000100503	NIN	-0.0150905	0.915698	0.958047
ENSG00000082516	GEMIN5	-0.868509	0.000450754	0.00345024
ENSG00000255389	Z97989.1	-0.867993	0.281484	0.497374
ENSG00000100519	PSMC6	0.0904648	0.605398	0.776493
ENSG00000198134	AC007537.1	-0.867853	0.302241	0.517789
ENSG00000100523	DDHD1	-0.177218	0.531448	0.723985
ENSG00000278540	ACACA	-0.867563	4.26653e-06	5.94719e-05
ENSG00000228878	SEPT7-AS1	-0.866346	0.338753	0.556055
ENSG00000196092	PAX5	-0.866341	0.424773	0.637645
ENSG00000136933	RABEPK	-0.866248	4.78388e-05	0.000495287
ENSG00000147394	ZNF185	-0.866025	4.70236e-09	1.31981e-07
ENSG00000089199	CHGB	-0.865918	0.405409	0.619367
ENSG00000248919	ATP5J2-PTCD1	-0.865571	0.0191524	0.0744564
ENSG00000117016	RIMS3	-0.865571	0.330998	0.54783
ENSG00000210195	MT-TT	-0.865475	0.0569858	0.166862
ENSG00000255508	AP002990.1	-0.865371	0.100332	0.249572
ENSG00000100580	TMED8	0.0373102	0.842062	0.918931
ENSG00000100583	SAMD15	0.405188	0.540377	0.729697
ENSG00000100591	AHSA1	0.00727735	0.963416	0.982736
ENSG00000260708	AL118516.1	-0.863584	0.225994	0.430746
ENSG00000229605	RPL21P93	-0.863403	0.244781	0.453656
ENSG00000170439	METTL7B	-0.863315	0.0438759	0.137816
ENSG00000234166	ARHGEF19-AS1	-0.863085	0.143785	0.320316
ENSG00000163535	SGO2	-0.862794	0.000421754	0.00325512
ENSG00000168411	RFWD3	-0.862631	4.55465e-08	1.04538e-06
ENSG00000101400	SNTA1	-0.861695	0.273564	0.487959
ENSG00000153107	ANAPC1	-0.86143	6.05718e-06	8.0463e-05
ENSG00000134222	PSRC1	-0.86131	0.00296895	0.0168034
ENSG00000100628	ASB2	0.121644	0.831739	0.913991
ENSG00000100629	CEP128	-0.0918373	0.805589	0.900924
ENSG00000062822	POLD1	-0.860254	0.000210354	0.00179874
ENSG00000272476	AL024507.2	-0.860071	0.0828422	0.218328
ENSG00000108561	C1QBP	-0.859947	6.05947e-12	2.89533e-10
ENSG00000269139	AC010336.5	-0.859861	0.0526058	0.157578
ENSG00000206249	AL359555.1	-0.859569	0.0896331	0.231201
ENSG00000100678	SLC8A3	0.361868	0.562221	0.747038
ENSG00000100697	DICER1	0.0254467	0.879554	0.938348
ENSG00000226200	SGMS1-AS1	-0.859547	0.0919269	0.235309
ENSG00000184937	WT1	-0.85925	3.99799e-06	5.61856e-05
ENSG00000269896	AL513477.1	-0.85884	0.159971	0.343326
ENSG00000124207	CSE1L	-0.858475	1.38177e-08	3.51982e-07
ENSG00000272405	AL365181.3	-0.858244	0.0301762	0.104552
ENSG00000180822	PSMG4	-0.857668	0.000403891	0.00314186
ENSG00000132661	NXT1	-0.85696	1.05883e-05	0.0001324
ENSG00000179564	LSMEM2	-0.856575	0.00770522	0.0363897
ENSG00000269937	AC093525.7	-0.855845	0.433534	0.644173
ENSG00000100784	RPS6KA5	0.111105	0.607368	0.777352
ENSG00000100796	PPP4R3A	0.0176632	0.898095	0.94844
ENSG00000100802	C14orf93	-0.0946115	0.712171	0.844261
ENSG00000177508	IRX3	-0.855713	3.60959e-05	0.00038663
ENSG00000100811	YY1	0.00350249	0.976881	0.989204
ENSG00000100813	ACIN1	0.081913	0.570989	0.752523
ENSG00000123737	EXOSC9	-0.8557	7.51019e-05	0.000736906
ENSG00000183010	PYCR1	-0.855684	4.69179e-05	0.000487674
ENSG00000132141	CCT6B	-0.85536	0.00811679	0.0379104
ENSG00000142765	SYTL1	-0.855136	5.37006e-06	7.26201e-05
ENSG00000162769	FLVCR1	-0.854783	0.00334763	0.0185864
ENSG00000163528	CHCHD4	-0.854541	0.00101714	0.00683349
ENSG00000179344	HLA-DQB1	-0.854441	0.29701	0.513116
ENSG00000100888	CHD8	-0.0311521	0.85732	0.927442
ENSG00000198805	PNP	-0.854275	1.96154e-10	7.14309e-09
ENSG00000163918	RFC4	-0.853993	0.00163338	0.0102041
ENSG00000100897	DCAF11	-0.0644167	0.589552	0.765801
ENSG00000100902	PSMA6	0.230326	0.677213	0.82242
ENSG00000169752	NRG4	-0.853675	0.00490632	0.0253399
ENSG00000111788	AC009533.1	-0.853252	0.136139	0.308781
ENSG00000130598	TNNI2	-0.852744	0.283573	0.499071
ENSG00000100916	BRMS1L	-0.255487	0.63292	0.795308
ENSG00000241360	PDXP	-0.852697	0.0271808	0.096792
ENSG00000137474	MYO7A	-0.85268	0.180428	0.37204
ENSG00000237748	UQCRBP1	-0.852642	0.380038	0.595493
ENSG00000115946	PNO1	-0.852639	6.02904e-06	8.01567e-05
ENSG00000065150	IPO5	-0.852537	1.7158e-09	5.30484e-08
ENSG00000100949	RABGGTA	0.0610077	0.752049	0.869633
ENSG00000100479	POLE2	-0.852456	0.0359292	0.11872
ENSG00000006740	ARHGAP44	-0.852032	0.446057	0.65415
ENSG00000260252	AC009087.1	-0.851827	0.107215	0.262023
ENSG00000023909	GCLM	-0.851377	0.000113925	0.00105981
ENSG00000216285	AC078819.1	-0.851174	0.0347708	0.116109
ENSG00000100994	PYGB	-0.0806293	0.59329	0.768314
ENSG00000100997	ABHD12	-0.00506627	0.974756	0.98785
ENSG00000101000	PROCR	0.231996	0.637109	0.798463
ENSG00000258459	AL356019.1	-0.851065	0.226977	0.432127
ENSG00000101017	CD40	0.121519	0.744516	0.864724
ENSG00000101019	UQCC1	-0.0887466	0.592893	0.76799
ENSG00000272914	AL359532.1	-0.85072	0.214641	0.416251
ENSG00000132423	COQ3	-0.850284	0.0137768	0.0578978
ENSG00000146205	ANO7	-0.850248	0.112313	0.27054
ENSG00000272234	AC008945.1	-0.850245	0.0536578	0.159881
ENSG00000101082	SLA2	-0.0624215	0.67442	0.821083
ENSG00000250251	PKD1P6	-0.850057	0.169853	0.356765
ENSG00000124571	XPO5	-0.849957	6.34388e-07	1.08847e-05
ENSG00000103356	EARS2	-0.849749	0.00128899	0.00836408
ENSG00000181790	ADGRB1	-0.849248	0.0512818	0.154772
ENSG00000101126	ADNP	-0.0779062	0.576725	0.756618
ENSG00000101132	PFDN4	0.00130694	0.995163	0.998196
ENSG00000101138	CSTF1	-0.0498272	0.765402	0.877161
ENSG00000112312	GMNN	-0.849045	7.72349e-05	0.000755605
ENSG00000136261	BZW2	-0.848724	8.2316e-09	2.19621e-07
ENSG00000101152	DNAJC5	0.0395546	0.735374	0.859299
ENSG00000132881	RSG1	-0.848205	0.0265974	0.0952998
ENSG00000223508	RPL23AP53	-0.848105	0.335594	0.552834
ENSG00000134001	EIF2S1	-0.848052	1.6516e-08	4.14688e-07
ENSG00000101162	TUBB1	-0.0486377	0.94729	0.974602
ENSG00000147138	GPR174	-0.848011	0.201095	0.399707
ENSG00000232434	C9orf172	-0.84798	0.162027	0.346088
ENSG00000173457	PPP1R14B	-0.847707	1.28665e-06	2.03082e-05
ENSG00000138100	TRIM54	-0.846766	0.393468	0.608098
ENSG00000101189	MRGBP	0.0199555	0.908514	0.953758
ENSG00000174442	ZWILCH	-0.846252	5.90441e-05	0.000596035
ENSG00000258749	AL110504.1	-0.845558	0.179196	0.370275
ENSG00000142207	URB1	-0.845051	5.54728e-06	7.4685e-05
ENSG00000170915	PAQR8	-0.843415	0.00258589	0.0150126
ENSG00000267838	AC245884.8	-0.843374	0.253625	0.464641
ENSG00000101200	AVP	0.107048	0.863984	0.930362
ENSG00000109881	CCDC34	-0.842596	0.000544002	0.00404805
ENSG00000149136	SSRP1	-0.84154	4.41034e-09	1.25301e-07
ENSG00000087586	AURKA	-0.841348	0.000146713	0.00132118
ENSG00000229671	LINC01150	-0.841259	0.0180317	0.0709213
ENSG00000260304	AC009088.2	-0.840579	0.000793572	0.00558618
ENSG00000249565	SERBP1P5	-0.840277	0.0746179	0.203173
ENSG00000101246	ARFRP1	0.00130886	0.994094	0.99751
ENSG00000101247	NDUFAF5	0.0865486	0.773126	0.881688
ENSG00000232754	AL035658.1	-0.839507	0.381804	0.59725
ENSG00000053372	MRTO4	-0.839452	5.53786e-05	0.000565185
ENSG00000188820	CALHM6	-0.839176	0.0080492	0.0376728
ENSG00000013810	TACC3	-0.838682	1.77219e-10	6.49859e-09
ENSG00000112297	CRYBG1	-0.838118	0.0356619	0.118134
ENSG00000101294	HM13	0.0207865	0.894332	0.946507
ENSG00000101307	SIRPB1	0.0181892	0.9218	0.961908
ENSG00000101310	SEC23B	0.0665979	0.669082	0.8179
ENSG00000084774	CAD	-0.837819	1.24651e-09	3.93889e-08
ENSG00000166965	RCCD1	-0.837627	0.000647977	0.00468468
ENSG00000101337	TM9SF4	0.0832212	0.595757	0.770057
ENSG00000255992	AC131009.1	-0.836878	0.12902	0.298036
ENSG00000101343	CRNKL1	-0.000845704	0.996355	0.998489
ENSG00000070081	NUCB2	-0.836558	3.32273e-10	1.15657e-08
ENSG00000102010	BMX	-0.836315	0.0010355	0.00692738
ENSG00000141668	CBLN2	-0.836285	0.204214	0.403869
ENSG00000101353	MROH8	-0.136859	0.79274	0.892629
ENSG00000262313	AC127496.3	-0.835011	0.348932	0.566454
ENSG00000175414	ARL10	-0.834931	0.000273187	0.00224472
ENSG00000132718	SYT11	-0.833891	3.07316e-05	0.000338154
ENSG00000057704	TMCC3	-0.833575	0.155572	0.337655
ENSG00000169314	C22orf15	-0.833209	0.0161044	0.0649945
ENSG00000101391	CDK5RAP1	-0.100671	0.600817	0.773362
ENSG00000118162	KPTN	-0.832912	0.000196483	0.00169854
ENSG00000116731	PRDM2	-0.832798	3.32329e-08	7.83284e-07
ENSG00000184178	SCFD2	-0.832745	0.00473115	0.0246126
ENSG00000101413	RPRD1B	-0.0133486	0.938753	0.970767
ENSG00000213839	TMX2P1	-0.832141	0.0607972	0.174936
ENSG00000196535	MYO18A	-0.831468	1.42423e-06	2.22569e-05
ENSG00000144554	FANCD2	-0.831415	3.69593e-05	0.000394033
ENSG00000104613	INTS10	-0.831169	4.1777e-09	1.19989e-07
ENSG00000060656	PTPRU	-0.829967	0.196086	0.393119
ENSG00000168393	DTYMK	-0.829823	1.54231e-06	2.38891e-05
ENSG00000158457	TSPAN33	-0.829537	2.56525e-06	3.78734e-05
ENSG00000100359	SGSM3	-0.829404	0.385201	0.600002
ENSG00000076248	UNG	-0.829362	1.14352e-07	2.36627e-06
ENSG00000278156	TSC22D1-AS1	-0.829083	0.410648	0.624587
ENSG00000167074	TEF	-0.828972	0.0380839	0.124105
ENSG00000175768	TOMM5	-0.828808	0.318849	0.535593
ENSG00000101473	ACOT8	0.0210396	0.905139	0.95168
ENSG00000059573	ALDH18A1	-0.828758	7.0478e-07	1.19494e-05
ENSG00000188486	H2AFX	-0.828717	1.3995e-07	2.84373e-06
ENSG00000104472	CHRAC1	-0.827561	7.73017e-06	9.98274e-05
ENSG00000188493	C19orf54	-0.827495	1.02137e-06	1.66202e-05
ENSG00000166123	GPT2	-0.827454	3.17512e-07	5.84875e-06
ENSG00000101220	C20orf27	-0.826795	5.43098e-05	0.000555186
ENSG00000101574	METTL4	-0.136845	0.643282	0.802537
ENSG00000125247	TMTC4	-0.826347	0.0028047	0.0159828
ENSG00000253320	AZIN1-AS1	-0.826243	0.156737	0.339156
ENSG00000165060	FXN	-0.826199	0.00397852	0.0213888
ENSG00000145284	SCD5	-0.826134	0.0257587	0.0931568
ENSG00000101624	CEP76	-0.0990299	0.74433	0.864701
ENSG00000214223	HNRNPA1P10	-0.826056	0.0152959	0.0625643
ENSG00000265393	AC084125.4	-0.825556	0.0399781	0.128629
ENSG00000101665	SMAD7	-0.0811277	0.865806	0.931688
ENSG00000262732	AC010401.2	-0.825216	0.256077	0.467324
ENSG00000233493	TMEM238	-0.824375	0.000862222	0.00598394
ENSG00000171208	NETO2	-0.824072	0.0148753	0.0613852
ENSG00000116771	AGMAT	-0.823008	0.0143375	0.0596659
ENSG00000272844	AC074044.1	-0.822977	0.058606	0.17031
ENSG00000230207	RPL4P5	-0.822729	0.277493	0.492516
ENSG00000055118	KCNH2	-0.821795	0.0353714	0.117429
ENSG00000101843	PSMD10	0.00825652	0.96608	0.983926
ENSG00000179965	ZNF771	-0.821788	2.85751e-06	4.18359e-05
ENSG00000101846	STS	0.145441	0.739472	0.861469
ENSG00000261167	AC107027.3	-0.821281	0.258015	0.469248
ENSG00000132341	RAN	-0.821118	4.67336e-08	1.07107e-06
ENSG00000237424	FOXD2-AS1	-0.820924	0.0642085	0.182356
ENSG00000174306	ZHX3	-0.820769	0.00059184	0.00434255
ENSG00000187244	BCAM	-0.820535	0.163115	0.347333
ENSG00000101901	ALG13	0.114854	0.644446	0.80295
ENSG00000176896	TCEANC	-0.820503	0.116191	0.276961
ENSG00000100427	MLC1	-0.82009	6.3909e-11	2.57071e-09
ENSG00000196715	VKORC1L1	-0.819805	1.8296e-05	0.000213855
ENSG00000206053	JPT2	-0.819317	1.60231e-08	4.03599e-07
ENSG00000147124	ZNF41	-0.817955	0.00703701	0.0338292
ENSG00000261542	AC011978.2	-0.817598	0.255778	0.46706
ENSG00000117528	ABCD3	-0.816689	2.33344e-06	3.48755e-05
[truncated: 13,769 more rows]

## Sheet: non-t(6;9)-Selinexor
Ensembl gene id	Gene name	log2FoldChange	pvalue	padj
ENSG00000198576	ARC	-24.2388	8.99613e-23	9.49798e-20
ENSG00000176485	PLA2G16	-21.6644	4.86804e-11	6.18836e-09
ENSG00000249310	APOBEC3B-AS1	-7.40128	2.6605e-07	1.33305e-05
ENSG00000000938	FGR	-1.09504	0.213628	0.533113
ENSG00000001036	FUCA2	-0.312631	0.409498	0.719219
ENSG00000256663	AC112777.1	-7.22623	4.6768e-05	0.00115021
ENSG00000001167	NFYA	-0.328825	0.479539	0.76834
ENSG00000001460	STPG1	-1.29513	0.400313	0.714017
ENSG00000001461	NIPAL3	0.464503	0.189452	0.502902
ENSG00000102384	CENPI	-7.07438	0.000207943	0.00395066
ENSG00000001561	ENPP4	-1.1459	0.464889	0.757944
ENSG00000001617	SEMA3F	-0.870075	0.226944	0.548918
ENSG00000001629	ANKIB1	-0.150338	0.809552	0.929944
ENSG00000179750	APOBEC3B	-6.94874	2.73398e-05	0.000736082
ENSG00000138778	CENPE	-6.84774	1.67688e-07	8.75827e-06
ENSG00000107731	UNC5B	-6.71453	0.00355653	0.0380384
ENSG00000109674	NEIL3	-6.66946	2.46325e-05	0.000673059
ENSG00000263271	AC110285.4	-6.58201	9.74e-06	0.000312972
ENSG00000002726	AOC1	1.39879	0.206525	0.524329
ENSG00000002822	MAD1L1	0.00979579	0.976976	0.992078
ENSG00000112984	KIF20A	-6.30987	1.16519e-07	6.52373e-06
ENSG00000188610	FAM72B	-6.11834	0.000174773	0.00342034
ENSG00000002933	TMEM176A	0.600717	0.581219	0.829567
ENSG00000003056	M6PR	-0.334384	0.393875	0.710156
ENSG00000003096	KLHL13	-1.27814	0.38348	0.701709
ENSG00000196550	FAM72A	-6.10157	0.000630199	0.00977436
ENSG00000003249	DBNDD1	-0.796814	0.427756	0.732808
ENSG00000003393	ALS2	-0.612883	0.44938	0.747244
ENSG00000003400	CASP10	0.21302	0.510716	0.788726
ENSG00000271989	AL139424.1	-6.04451	0.000745657	0.0111894
ENSG00000163507	CIP2A	-6.00483	2.42926e-05	0.000668658
ENSG00000003509	NDUFAF7	0.00336794	0.994951	0.997651
ENSG00000003756	RBM5	-0.233598	0.222129	0.542961
ENSG00000003987	MTMR7	-1.77039	0.241708	0.565836
ENSG00000214826	DDX12P	-5.99585	1.04634e-05	0.000331886
ENSG00000004139	SARM1	0.466137	0.376231	0.695984
ENSG00000004142	POLDIP2	0.0917399	0.648646	0.863262
ENSG00000281691	RBM5-AS1	-5.91415	0.000353438	0.00611014
ENSG00000175344	CHRNA7	-5.88733	0.00637218	0.058867
ENSG00000004468	CD38	0.286816	0.263153	0.589782
ENSG00000162885	B3GALNT2	-5.88691	0.00226524	0.0271333
ENSG00000004487	KDM1A	-0.0171767	0.93663	0.977361
ENSG00000075218	GTSE1	-5.82423	3.7994e-12	7.10779e-10
ENSG00000004660	CAMKK1	0.780108	0.283595	0.613197
ENSG00000004700	RECQL	-0.336746	0.454235	0.75076
ENSG00000004766	VPS50	-0.730463	0.205655	0.523777
ENSG00000004777	ARHGAP33	-0.864206	0.29558	0.627559
ENSG00000101624	CEP76	-5.81143	0.0021978	0.0265406
ENSG00000004809	SLC22A16	-0.309636	0.770604	0.915177
ENSG00000004838	ZMYND10	0.966981	0.387132	0.704704
ENSG00000004864	SLC25A13	-0.458255	0.360481	0.682498
ENSG00000004866	ST7	-0.501689	0.532096	0.802064
ENSG00000253806	AC108002.2	-5.75852	0.00625497	0.0581842
ENSG00000004961	HCCS	-0.557175	0.23163	0.554085
ENSG00000117479	SLC19A2	-5.74739	0.000350616	0.00606844
ENSG00000165490	DDIAS	-5.66594	5.67549e-05	0.0013337
ENSG00000005020	SKAP2	-0.0193709	0.937496	0.977666
ENSG00000112742	TTK	-5.60457	3.01627e-05	0.000801861
ENSG00000140451	PIF1	-5.59491	2.95387e-06	0.000113701
ENSG00000163705	FANCD2OS	-5.57403	0.00312233	0.0343898
ENSG00000005075	POLR2J	0.0540391	0.80396	0.927199
ENSG00000005100	DHX33	-0.425565	0.278216	0.606893
ENSG00000005108	THSD7A	-0.628834	0.633174	0.854785
ENSG00000005156	LIG3	-0.200665	0.485587	0.772711
ENSG00000005175	RPAP3	0.0838135	0.884448	0.958756
ENSG00000005187	ACSM3	0.224569	0.511159	0.789163
ENSG00000005189	REXO5	0.308485	0.188198	0.501037
ENSG00000143167	GPA33	-5.54197	0.00281145	0.0319416
ENSG00000005206	SPPL2B	-0.240244	0.249519	0.573746
ENSG00000226526	AL049569.1	-5.45174	0.00395469	0.041165
ENSG00000005243	COPZ2	-0.493519	0.680112	0.877639
ENSG00000005249	PRKAR2B	-0.843803	0.226288	0.548051
ENSG00000005302	MSL3	-0.0430871	0.893235	0.962802
ENSG00000005339	CREBBP	0.052633	0.843026	0.944035
ENSG00000005379	TSPOAP1	0.0474484	0.890554	0.961324
ENSG00000005381	MPO	-0.00605824	0.980975	0.993565
ENSG00000248881	AC010245.1	-5.42051	0.00140675	0.0186989
ENSG00000005448	WDR54	0.365591	0.347939	0.672185
ENSG00000005469	CROT	-0.650016	0.595152	0.836928
ENSG00000005483	KMT2E	0.282288	0.558087	0.817396
ENSG00000138346	DNA2	-5.40848	0.000120559	0.00251692
ENSG00000005700	IBTK	0.0264768	0.919822	0.972246
ENSG00000005801	ZNF195	-0.271413	0.428255	0.73307
ENSG00000005810	MYCBP2	-0.0552446	0.892085	0.962159
ENSG00000005812	FBXL3	0.171688	0.628748	0.852823
ENSG00000261266	AC008870.3	-5.36732	0.000175647	0.00342511
ENSG00000005882	PDK2	0.361216	0.330769	0.658819
ENSG00000035499	DEPDC1B	-5.34814	9.24079e-06	0.000298677
ENSG00000188290	HES4	-5.30296	0.00152581	0.0200294
ENSG00000005893	LAMP2	-0.277052	0.350073	0.673842
ENSG00000234203	AC004771.2	-5.27372	0.0045114	0.0454244
ENSG00000215068	AC025171.2	-5.24969	0.000162478	0.00322506
ENSG00000006015	REX1BD	0.0470899	0.844652	0.944607
ENSG00000178301	AQP11	-5.22899	0.00686953	0.0622936
ENSG00000006025	OSBPL7	0.16328	0.702649	0.885872
ENSG00000145075	CCDC39	-5.21452	0.00537923	0.0518998
ENSG00000186871	ERCC6L	-5.19673	0.000104873	0.00221577
ENSG00000006194	ZNF263	0.183923	0.414955	0.722952
ENSG00000006282	SPATA20	-0.144285	0.44215	0.742501
ENSG00000006327	TNFRSF12A	0.133229	0.864086	0.95231
ENSG00000279069	AC015813.5	-5.17111	0.000301339	0.00535348
ENSG00000105971	CAV2	-5.13726	0.000289996	0.00518938
ENSG00000006453	BAIAP2L1	-1.43171	0.397224	0.71274
ENSG00000006459	KDM7A	0.707876	0.718675	0.891781
ENSG00000006530	AGK	-0.0989529	0.897569	0.964111
ENSG00000066279	ASPM	-5.13075	1.08067e-09	1.11702e-07
ENSG00000006576	PHTF2	0.125282	0.823943	0.935816
ENSG00000106006	HOXA6	-5.12463	0.00969839	0.0799508
ENSG00000006625	GGCT	-0.563716	0.265911	0.592468
ENSG00000085382	HACE1	-5.07471	0.000220081	0.00414925
ENSG00000006638	TBXA2R	0.410876	0.625918	0.852035
ENSG00000006652	IFRD1	0.33993	0.4086	0.719072
ENSG00000006695	COX10	-0.261254	0.462142	0.755633
ENSG00000128567	PODXL	-5.03428	0.00648551	0.0596529
ENSG00000196584	XRCC2	-5.03316	0.000470095	0.0076694
ENSG00000006715	VPS41	0.349685	0.203612	0.52097
ENSG00000006740	ARHGAP44	0.0412771	0.975347	0.991736
ENSG00000198018	ENTPD7	-5.01363	0.00823259	0.0709938
ENSG00000260793	AC003102.1	-5.01328	0.00219187	0.0264906
ENSG00000171643	S100Z	-4.97182	0.00474441	0.0470652
ENSG00000231551	AC245100.4	-4.97017	0.0260345	0.156048
ENSG00000007047	MARK4	0.263422	0.372433	0.693403
ENSG00000007062	PROM1	0.04023	0.905453	0.966596
ENSG00000007080	CCDC124	-0.142026	0.563986	0.820419
ENSG00000007129	CEACAM21	0.593154	0.499389	0.781196
ENSG00000205592	MUC19	-4.96033	0.0155582	0.11135
ENSG00000236842	AC010997.2	-4.94395	0.00408249	0.0421686
ENSG00000235381	AL596202.1	-4.94284	0.00050076	0.00808933
ENSG00000171320	ESCO2	-4.93441	8.63309e-05	0.00189607
ENSG00000007264	MATK	0.157668	0.630778	0.853881
ENSG00000188064	WNT7B	-4.92765	0.0283911	0.165428
ENSG00000007341	ST7L	-0.118945	0.800874	0.926108
ENSG00000007372	PAX6	-1.15268	0.328101	0.657327
ENSG00000007376	RPUSD1	0.127244	0.650188	0.863497
ENSG00000007384	RHBDF1	0.912127	0.263108	0.589782
ENSG00000007392	LUC7L	-0.142243	0.424277	0.730384
ENSG00000007402	CACNA2D2	-2.03728	0.209113	0.527577
ENSG00000007516	BAIAP3	0.582209	0.208652	0.527014
ENSG00000136944	LMX1B	-4.92688	0.00271638	0.0311006
ENSG00000007541	PIGQ	-0.121074	0.707751	0.887532
ENSG00000007545	CRAMP1	-0.257333	0.599874	0.839892
ENSG00000007866	TEAD3	0.351568	0.825819	0.936789
ENSG00000007923	DNAJC11	-0.229047	0.39553	0.711254
ENSG00000007944	MYLIP	0.306004	0.607618	0.843949
ENSG00000264575	LINC00526	-4.90932	0.00815329	0.0706826
ENSG00000008018	PSMB1	-0.04883	0.799768	0.925445
ENSG00000101447	FAM83D	-4.90428	2.30623e-05	0.000645928
ENSG00000008083	JARID2	-0.218864	0.369498	0.690658
ENSG00000008130	NADK	0.139319	0.630059	0.85369
ENSG00000008226	DLEC1	0.25975	0.516547	0.792597
ENSG00000008256	CYTH3	-0.468489	0.314528	0.645467
ENSG00000253174	AC009630.2	-4.89401	0.00049585	0.00802756
ENSG00000008282	SYPL1	-0.0495671	0.871531	0.954725
ENSG00000008283	CYB561	-0.254814	0.596291	0.837335
ENSG00000008294	SPAG9	-0.628548	0.19016	0.50345
ENSG00000008300	CELSR3	-0.694083	0.677474	0.876384
ENSG00000008324	SS18L2	0.179898	0.658349	0.866988
ENSG00000005073	HOXA11	-4.89036	5.90991e-07	2.72982e-05
ENSG00000008394	MGST1	-0.0655811	0.75959	0.910362
ENSG00000008405	CRY1	-0.995245	0.391335	0.708776
ENSG00000283689	AC018553.2	-4.87994	0.000706139	0.0106941
ENSG00000008513	ST3GAL1	0.398517	0.218173	0.537827
ENSG00000008516	MMP25	-1.35981	0.258061	0.5836
ENSG00000135451	TROAP	-4.87929	2.14024e-09	1.9649e-07
ENSG00000181790	ADGRB1	-4.8665	0.0106484	0.0854939
ENSG00000008838	MED24	-0.268995	0.334044	0.661599
ENSG00000008853	RHOBTB2	0.0995809	0.763656	0.912202
ENSG00000117010	ZNF684	-4.86432	0.0118572	0.0915204
ENSG00000167771	RCOR2	-4.85242	0.00727988	0.0649658
ENSG00000255234	AP000446.1	-4.82729	0.00755071	0.0667277
ENSG00000102302	FGD1	-4.81832	0.0110393	0.0872959
ENSG00000009335	UBE3C	-0.470295	0.227297	0.549416
ENSG00000151611	MMAA	-4.81444	0.00196586	0.0243479
ENSG00000163009	C2orf48	-4.80416	0.0154229	0.110663
ENSG00000009780	FAM76A	-0.27234	0.766639	0.913404
ENSG00000009790	TRAF3IP3	-0.0910544	0.742124	0.901787
ENSG00000241360	PDXP	-4.80081	0.000254092	0.00466551
ENSG00000009844	VTA1	-0.0610299	0.793657	0.924319
ENSG00000009954	BAZ1B	-0.369467	0.272399	0.599602
ENSG00000034693	PEX3	-4.79338	0.00315123	0.0345964
ENSG00000010072	SPRTN	0.534116	0.3065	0.638467
ENSG00000010165	METTL13	-0.169861	0.556575	0.816669
ENSG00000010219	DYRK4	-0.0159567	0.969059	0.989411
ENSG00000010244	ZNF207	0.0463095	0.859283	0.950116
ENSG00000010256	UQCRC1	-0.0525326	0.828693	0.937512
ENSG00000006704	GTF2IRD1	-4.78659	0.0068766	0.0623194
ENSG00000010278	CD9	-0.640351	0.451778	0.74931
ENSG00000104899	AMH	-4.78362	0.00351176	0.0378822
ENSG00000164715	LMTK2	-4.7773	0.000974289	0.0139815
ENSG00000010310	GIPR	-0.475633	0.783826	0.919391
ENSG00000010318	PHF7	-0.297955	0.593135	0.835601
ENSG00000214279	SCART1	-4.75532	0.0456513	0.223879
ENSG00000156970	BUB1B	-4.73499	2.79597e-05	0.000748682
ENSG00000010327	STAB1	-0.13041	0.583485	0.830796
ENSG00000010361	FUZ	0.0144388	0.95398	0.98402
ENSG00000118193	KIF14	-4.73359	3.05358e-06	0.000116628
ENSG00000010404	IDS	0.384591	0.19322	0.507009
ENSG00000010539	ZNF200	0.102985	0.856481	0.948874
ENSG00000139438	FAM222A	-4.66964	0.00634036	0.0586463
ENSG00000156427	FGF18	-4.65725	0.0335014	0.184596
ENSG00000176927	EFCAB5	-4.65585	0.00987606	0.0807401
ENSG00000010803	SCMH1	-0.238387	0.592366	0.834995
ENSG00000010810	FYN	0.202033	0.504317	0.785172
ENSG00000010818	HIVEP2	0.387761	0.40768	0.718997
ENSG00000011007	ELOA	0.285579	0.240786	0.564572
ENSG00000011009	LYPLA2	-0.101339	0.717961	0.891781
ENSG00000130956	HABP4	-4.65563	0.0161729	0.114169
ENSG00000224919	AL591684.1	-4.64756	0.0177716	0.121331
ENSG00000011114	BTBD7	-0.526844	0.230569	0.554063
ENSG00000117016	RIMS3	-4.63193	0.00298653	0.0333814
ENSG00000011143	MKS1	0.335349	0.620581	0.850673
ENSG00000011198	ABHD5	0.0917347	0.927294	0.974331
ENSG00000121621	KIF18A	-4.62964	0.000222344	0.00418659
ENSG00000011258	MBTD1	0.318358	0.357965	0.680351
ENSG00000011260	UTP18	-0.241098	0.377363	0.696615
ENSG00000011275	RNF216	-0.101629	0.703767	0.885872
ENSG00000011295	TTC19	-0.0670562	0.742592	0.902123
ENSG00000255121	AP003392.4	-4.62872	0.0020906	0.0255593
ENSG00000011332	DPF1	-0.201426	0.88173	0.958051
ENSG00000238133	MAP3K20-AS1	-4.60395	0.00355012	0.0380384
ENSG00000011405	PIK3C2A	-0.801338	0.473324	0.76393
ENSG00000011422	PLAUR	0.299556	0.623943	0.851482
ENSG00000259494	MRPL46	-4.53934	0.00708198	0.0636345
ENSG00000011451	WIZ	-0.284834	0.308821	0.640851
ENSG00000011454	RABGAP1	-0.0280295	0.956698	0.984436
ENSG00000011478	QPCTL	0.286359	0.610692	0.845141
ENSG00000163596	ICA1L	-4.5393	0.00384597	0.0403458
ENSG00000273899	NOL12	-4.53773	0.00795396	0.069559
ENSG00000011566	MAP4K3	0.925002	0.255781	0.580932
ENSG00000198093	ZNF649	-4.53174	0.00242453	0.0285099
ENSG00000171790	SLFNL1	-4.52149	0.0422918	0.21335
ENSG00000111788	AC009533.1	-4.52125	0.00883972	0.0748767
ENSG00000248734	AC008906.1	-4.52119	0.00311755	0.0343628
ENSG00000012124	CD22	-1.1358	0.212314	0.531886
ENSG00000165304	MELK	-4.51906	0.000194069	0.00372053
ENSG00000012174	MBTPS2	-0.717631	0.454931	0.75113
ENSG00000012211	PRICKLE3	-0.763033	0.400569	0.714297
ENSG00000012232	EXTL3	0.0456427	0.911547	0.968827
ENSG00000040199	PHLPP2	-4.51896	0.0154543	0.110781
ENSG00000012779	ALOX5	0.69799	0.586785	0.832048
ENSG00000105855	ITGB8	-4.51303	0.0164916	0.115411
ENSG00000182010	RTKN2	-4.51049	0.00223847	0.0269656
ENSG00000012983	MAP4K5	-0.376281	0.361093	0.683483
ENSG00000269910	AL049840.2	-4.49452	0.0144995	0.105732
ENSG00000013275	PSMC4	-0.238227	0.405675	0.71837
ENSG00000013288	MAN2B2	-0.18471	0.517492	0.793233
ENSG00000013306	SLC25A39	-0.313793	0.302128	0.63407
ENSG00000258334	AC125611.4	-4.48507	0.000591692	0.00928019
ENSG00000278922	AC002310.6	-4.47472	0.00480032	0.0474288
ENSG00000270419	CAHM	-4.46981	0.0392148	0.203956
ENSG00000013392	RWDD2A	0.593773	0.624478	0.85154
ENSG00000013441	CLK1	0.251775	0.409828	0.719219
ENSG00000233381	AK4P3	-4.46329	0.00902973	0.0757913
ENSG00000013523	ANGEL1	0.0944553	0.89758	0.964111
ENSG00000013561	RNF14	0.105276	0.84457	0.944607
ENSG00000139508	SLC46A3	-4.4559	0.00120494	0.0165523
ENSG00000169379	ARL13B	-4.45557	0.00463452	0.046317
ENSG00000221886	ZBED8	-4.45144	0.00261613	0.0302575
ENSG00000013725	CD6	1.37811	0.256465	0.581986
ENSG00000225075	AL603832.1	-4.43123	0.0783496	0.310895
ENSG00000014123	UFL1	-0.43171	0.355269	0.678383
ENSG00000080986	NDC80	-4.42754	3.31568e-06	0.000124705
ENSG00000178163	ZNF518B	-4.41651	0.00161142	0.0208021
ENSG00000014216	CAPN1	0.10877	0.594593	0.836767
ENSG00000014257	ACPP	-0.799605	0.419112	0.72658
ENSG00000014641	MDH1	-0.137154	0.59792	0.838506
ENSG00000014824	SLC30A9	0.254876	0.404581	0.717384
ENSG00000014914	MTMR11	1.46996	0.32255	0.653235
ENSG00000014919	COX15	0.0766834	0.768395	0.913839
ENSG00000131094	C1QL1	-4.41223	0.0207612	0.134829
ENSG00000015153	YAF2	-0.302256	0.694167	0.881309
ENSG00000015171	ZMYND11	-0.437702	0.436873	0.739766
ENSG00000015285	WAS	-0.117109	0.517705	0.793233
ENSG00000015413	DPEP1	1.23584	0.443912	0.743846
ENSG00000015475	BID	-0.0832116	0.790717	0.922791
ENSG00000015479	MATR3	-1.43663	0.421317	0.728505
ENSG00000015532	XYLT2	0.363564	0.240452	0.563967
ENSG00000015676	NUDCD3	-0.175715	0.51903	0.794016
ENSG00000016864	GLT8D1	-0.971382	0.400945	0.714775
ENSG00000017260	ATP2C1	-0.278608	0.391683	0.708921
ENSG00000017427	IGF1	-0.678499	0.799279	0.925418
ENSG00000017483	SLC38A5	-0.498902	0.253674	0.578629
ENSG00000278993	AC002350.2	-4.40989	0.00194119	0.0240913
ENSG00000018189	RUFY3	0.0577085	0.927759	0.974331
ENSG00000018280	SLC11A1	-0.0447731	0.971004	0.989941
ENSG00000018510	AGPS	0.279915	0.435059	0.738641
ENSG00000175206	NPPA	-4.40934	0.0277221	0.163163
ENSG00000018699	TTC27	0.38591	0.382882	0.701168
ENSG00000169607	CKAP2L	-4.40249	3.89459e-07	1.86902e-05
ENSG00000019144	PHLDB1	0.636719	0.33925	0.665047
ENSG00000116254	CHD5	-4.39468	3.80192e-05	0.000979028
ENSG00000019582	CD74	0.0479297	0.77923	0.918382
ENSG00000019991	HGF	0.124855	0.945782	0.980887
ENSG00000019995	ZRANB1	0.112954	0.731994	0.898563
ENSG00000020129	NCDN	-0.0411164	0.896439	0.964102
ENSG00000020181	ADGRA2	-0.00307878	0.99025	0.996016
ENSG00000020256	ZFP64	-0.498421	0.458047	0.753102
ENSG00000020426	MNAT1	0.357687	0.574503	0.825802
ENSG00000144158	AL078621.1	-4.37634	0.00899428	0.0755795
ENSG00000020922	MRE11	-0.00901054	0.973236	0.990644
ENSG00000255308	AC009652.2	-4.37465	0.0473356	0.22877
ENSG00000021574	SPAST	-0.149032	0.758848	0.909989
ENSG00000021762	OSBPL5	0.130221	0.822529	0.935215
ENSG00000163808	KIF15	-4.37461	0.000112086	0.00236003
ENSG00000227076	AL158166.1	-4.37138	0.0170651	0.11803
ENSG00000270055	AC127502.2	-4.36945	7.85188e-06	0.000260221
ENSG00000022567	SLC45A4	-0.191298	0.813964	0.93164
ENSG00000006432	MAP3K9	-4.35306	0.0342314	0.187229
ENSG00000022976	ZNF839	-0.485165	0.518955	0.793983
ENSG00000023041	ZDHHC6	0.0706949	0.824534	0.936321
ENSG00000023171	GRAMD1B	0.395775	0.489085	0.775691
ENSG00000023191	RNH1	-0.0118565	0.960615	0.985614
ENSG00000233799	AC139887.1	-4.35235	0.0167889	0.116843
ENSG00000023287	RB1CC1	-0.201168	0.579716	0.82909
ENSG00000023318	ERP44	-0.273648	0.434399	0.738014
ENSG00000023330	ALAS1	-0.0498576	0.946414	0.981336
ENSG00000023445	BIRC3	-0.131453	0.891993	0.962159
ENSG00000023516	AKAP11	-0.194003	0.571065	0.824791
ENSG00000023572	GLRX2	-0.330577	0.627065	0.852485
ENSG00000008277	ADAM22	-4.34967	0.0308693	0.174485
ENSG00000023697	DERA	0.0487815	0.905314	0.966588
ENSG00000276131	AC009118.2	-4.3495	0.0147481	0.107121
ENSG00000146410	MTFR2	-4.33264	0.000144303	0.00291785
ENSG00000167034	NKX3-1	-4.32426	0.0234226	0.146142
ENSG00000023909	GCLM	-0.562124	0.313017	0.644387
ENSG00000024048	UBR2	-0.238998	0.526665	0.798767
ENSG00000024422	EHD2	0.720586	0.29949	0.631221
ENSG00000186628	FSD2	-4.31415	0.0134442	0.0998083
ENSG00000275665	AC006449.3	-4.31211	0.0153585	0.110443
ENSG00000258428	AL161757.2	-4.30691	0.00818415	0.0707841
ENSG00000025156	HSF2	0.158937	0.778609	0.918119
ENSG00000025293	PHF20	0.259253	0.465924	0.758357
ENSG00000163710	PCOLCE2	-4.30536	0.0354288	0.191671
ENSG00000117724	CENPF	-4.29806	6.32535e-13	1.53271e-10
ENSG00000266980	AC087289.1	-4.29776	0.00439471	0.0445835
ENSG00000025772	TOMM34	-0.319851	0.27813	0.606795
ENSG00000186073	C15orf41	-4.29449	0.00309466	0.0342542
ENSG00000025800	KPNA6	-0.293387	0.386145	0.704125
ENSG00000149328	GLB1L2	-4.28798	0.0105621	0.0850781
ENSG00000169247	SH3TC2	-4.28356	0.00290024	0.032699
ENSG00000026297	RNASET2	0.288885	0.209216	0.527577
ENSG00000215302	AC127502.1	-4.28261	0.000303616	0.00538746
ENSG00000026652	AGPAT4	0.810286	0.575431	0.826606
ENSG00000178538	CA8	-4.27157	0.0108172	0.0862996
ENSG00000260808	AP003096.1	-4.26781	0.00452746	0.0454932
ENSG00000027075	PRKCH	0.658009	0.211514	0.530796
ENSG00000027697	IFNGR1	-0.245831	0.626692	0.85244
ENSG00000260448	LCMT1-AS1	-4.26714	0.0337314	0.185416
ENSG00000164440	TXLNB	-4.24121	0.00640288	0.0590768
ENSG00000028116	VRK2	-0.458995	0.345217	0.669992
ENSG00000186340	THBS2	-4.23707	0.0531882	0.245188
ENSG00000028203	VEZT	0.311889	0.421626	0.728764
ENSG00000152778	IFIT5	-4.2346	0.00501368	0.0492029
ENSG00000028310	BRD9	0.000550392	0.998793	0.999417
ENSG00000183426	NPIPA1	-4.23353	0.000394295	0.00663789
ENSG00000028839	TBPL1	0.589481	0.455276	0.751556
ENSG00000029153	ARNTL2	-1.12587	0.293089	0.6246
ENSG00000275632	AL035461.2	-4.22345	0.0166319	0.11618
ENSG00000119514	GALNT12	-4.22207	0.0123545	0.0941298
ENSG00000029639	TFB1M	-0.237741	0.644561	0.860721
ENSG00000029725	RABEP1	0.371874	0.402856	0.716357
ENSG00000138587	MNS1	-4.22054	0.0129683	0.0975492
ENSG00000030066	NUP160	-0.316462	0.472479	0.763653
ENSG00000153975	ZUFSP	-4.19185	0.000928611	0.0134172
ENSG00000030419	IKZF2	0.802857	0.284344	0.614072
ENSG00000165480	SKA3	-4.18976	3.3889e-06	0.000127135
ENSG00000031003	FAM13B	-0.472939	0.263555	0.589975
ENSG00000196081	ZNF724	-4.18547	0.0117003	0.0906402
ENSG00000031691	CENPQ	-0.340791	0.645737	0.86174
ENSG00000269940	AL049840.3	-4.18	0.00920185	0.0768867
ENSG00000082458	DLG3	-4.17794	0.0485054	0.232477
ENSG00000032219	ARID4A	-0.324129	0.548509	0.81219
ENSG00000032389	EIPR1	-0.0378983	0.903631	0.966159
ENSG00000226648	PLCG1-AS1	-4.17431	0.00651109	0.0598138
ENSG00000182853	VMO1	-4.17369	0.0162972	0.114698
ENSG00000196408	NOXO1	-4.17335	0.00883885	0.0748767
ENSG00000033030	ZCCHC8	-0.417432	0.239863	0.563312
ENSG00000089723	OTUB2	-4.16501	0.016843	0.116936
ENSG00000033100	CHPF2	0.271985	0.533283	0.802857
ENSG00000033170	FUT8	0.285705	0.643005	0.859647
ENSG00000276710	CSPG4P10	-4.16029	0.0771684	0.308052
ENSG00000033327	GAB2	0.354375	0.257247	0.583006
ENSG00000104936	DMPK	-4.15778	0.00523183	0.0507425
ENSG00000033800	PIAS1	0.0349615	0.864966	0.95231
ENSG00000272572	AL138762.1	-4.14769	0.0786198	0.311549
ENSG00000034053	APBA2	-0.416003	0.590391	0.834121
ENSG00000151575	TEX9	-4.14479	0.0187394	0.125732
ENSG00000272144	AC025171.4	-4.1401	0.0258828	0.155412
ENSG00000034533	ASTE1	-0.537748	0.289438	0.619577
ENSG00000034677	RNF19A	-0.730866	0.497419	0.780172
ENSG00000024526	DEPDC1	-4.13305	0.00113437	0.0156995
ENSG00000034713	GABARAPL2	0.300965	0.18967	0.503129
ENSG00000035115	SH3YL1	0.0736874	0.89	0.961151
ENSG00000035141	FAM136A	-0.329512	0.19777	0.51393
ENSG00000035403	VCL	-0.224815	0.626558	0.852421
ENSG00000268119	AC010615.2	-4.12537	0.0168253	0.116936
ENSG00000035664	DAPK2	-1.02239	0.339023	0.664778
ENSG00000035681	NSMAF	0.0383898	0.887245	0.960085
ENSG00000035687	ADSS	-0.354666	0.351652	0.675515
ENSG00000035720	STAP1	0.0091211	0.990285	0.996016
ENSG00000270953	AC007938.3	-4.12367	0.00135221	0.018137
ENSG00000188818	ZDHHC11	-4.11809	0.00926695	0.0773004
ENSG00000036054	TBC1D23	-0.0908673	0.852279	0.947326
ENSG00000036257	CUL3	0.219679	0.443461	0.743642
ENSG00000143498	TAF1A	-4.11222	0.0130867	0.0981376
ENSG00000036549	ZZZ3	0.14987	0.638658	0.857408
ENSG00000196873	CBWD3	-4.11097	0.00525038	0.0508891
ENSG00000037241	RPL26L1	-0.110244	0.771317	0.915361
ENSG00000037280	FLT4	-0.259447	0.785478	0.919933
ENSG00000237649	KIFC1	-4.11092	1.26037e-09	1.2503e-07
ENSG00000037637	FBXO42	0.229199	0.498176	0.780605
ENSG00000117650	NEK2	-4.10881	0.000810392	0.0119904
ENSG00000037757	MRI1	-0.711165	0.34784	0.672169
ENSG00000271857	AL096865.1	-4.10151	0.0420575	0.212822
ENSG00000243155	AL162431.2	-4.1013	0.00415314	0.0427788
ENSG00000258725	PRC1-AS1	-4.09757	0.00111835	0.0155507
ENSG00000038219	BOD1L1	-0.126258	0.69108	0.88052
ENSG00000038274	MAT2B	-0.0215897	0.94843	0.981839
ENSG00000038358	EDC4	-0.494507	0.297237	0.628948
ENSG00000038382	TRIO	-0.613521	0.193458	0.50741
ENSG00000038532	CLEC16A	-0.314215	0.505325	0.78596
ENSG00000039123	SKIV2L2	0.0131133	0.961483	0.985759
ENSG00000039319	ZFYVE16	0.428026	0.455908	0.751845
ENSG00000039523	RIPOR1	-0.258995	0.300649	0.632696
ENSG00000133121	STARD13	-4.09139	0.097461	0.351102
ENSG00000146722	AC211486.1	-4.08092	0.0366353	0.195516
ENSG00000204622	HLA-J	-4.07168	0.0644658	0.276675
ENSG00000040341	STAU2	0.384291	0.59022	0.834022
ENSG00000040487	PQLC2	0.140328	0.67561	0.875797
ENSG00000169679	BUB1	-4.06965	1.6668e-08	1.19597e-06
ENSG00000040608	RTN4R	0.0145913	0.959302	0.985299
ENSG00000040633	PHF23	0.0475885	0.871488	0.954725
ENSG00000040933	INPP4A	-0.551299	0.188587	0.501621
ENSG00000041353	RAB27B	0.188884	0.783668	0.919391
ENSG00000041357	PSMA4	-0.250305	0.224572	0.546134
ENSG00000129646	QRICH2	-4.06383	0.00186902	0.0234715
ENSG00000041880	PARP3	-0.752677	0.470751	0.762038
ENSG00000101306	MYLK2	-4.05167	0.00275822	0.0314577
ENSG00000042088	TDP1	-0.294442	0.460137	0.753908
ENSG00000042286	AIFM2	-0.956073	0.335274	0.66224
ENSG00000213658	LAT	-4.04272	0.0246486	0.151363
ENSG00000042429	MED17	0.690273	0.437214	0.739774
ENSG00000042445	RETSAT	0.406399	0.451311	0.748858
ENSG00000232828	AC231533.1	-4.0419	0.00722686	0.0646221
ENSG00000127951	FGL2	-4.03524	0.0487132	0.232568
ENSG00000166664	CHRFAM7A	-4.03413	0.00834747	0.0715585
ENSG00000043093	DCUN1D1	0.347969	0.300385	0.632298
ENSG00000043143	JADE2	0.179971	0.462056	0.755575
ENSG00000043462	LCP2	0.0894411	0.669957	0.872864
ENSG00000043514	TRIT1	-0.11116	0.828208	0.937392
ENSG00000253210	AC040970.1	-4.02413	0.0150555	0.108949
ENSG00000044090	CUL7	0.198755	0.625421	0.851689
ENSG00000044115	CTNNA1	-0.269015	0.40509	0.717862
ENSG00000260063	AL512408.1	-4.01318	0.0400305	0.206785
ENSG00000116711	PLA2G4A	-4.01123	0.00384952	0.0403545
ENSG00000257550	AC023509.2	-4.00146	0.0481212	0.231352
ENSG00000046647	GEMIN8	-0.0663642	0.91648	0.970796
ENSG00000046651	OFD1	0.0997023	0.873491	0.955097
ENSG00000253445	AC027309.1	-3.99819	0.00283388	0.032147
ENSG00000163430	FSTL1	-3.99546	0.0697522	0.29068
ENSG00000170049	KCNAB3	-3.98538	0.0354851	0.191713
ENSG00000184313	MROH7	-3.97539	0.0552549	0.250529
ENSG00000121053	EPX	-3.97232	0.0912111	0.338317
ENSG00000047346	FAM214A	-0.0247913	0.974027	0.991012
ENSG00000186185	KIF18B	-3.96942	4.69156e-13	1.15577e-10
ENSG00000271918	AC034236.2	-3.95761	0.0137278	0.101405
ENSG00000047457	CP	0.579361	0.244316	0.568877
ENSG00000047578	KIAA0556	-0.0282832	0.950142	0.982033
ENSG00000158402	CDC25C	-3.95503	0.00171331	0.0218503
ENSG00000135519	KCNH3	-3.94938	0.0239575	0.148476
ENSG00000047644	WWC3	0.142692	0.783684	0.919391
ENSG00000047662	FAM184B	-0.184848	0.733495	0.899036
ENSG00000060140	STYK1	-3.9216	0.0490653	0.233045
ENSG00000047932	GOPC	0.0744516	0.840741	0.942939
ENSG00000048028	USP28	-1.19445	0.253079	0.578138
ENSG00000048140	TSPAN17	0.118585	0.728942	0.896946
ENSG00000048162	NOP16	-0.0182764	0.933642	0.976449
ENSG00000048342	CC2D2A	-1.63025	0.249506	0.573746
ENSG00000269583	L34079.3	-3.91551	0.02828	0.165025
ENSG00000048405	ZNF800	0.46727	0.321693	0.652614
ENSG00000129195	PIMREG	-3.90632	0.00480454	0.0474388
ENSG00000048544	MRPS10	-0.260532	0.274531	0.602142
ENSG00000048649	RSF1	0.449928	0.212227	0.531886
ENSG00000048707	VPS13D	0.0749545	0.863097	0.951943
ENSG00000048740	CELF2	0.0251992	0.899702	0.964767
ENSG00000214787	MS4A4E	-3.90394	0.0390794	0.203751
ENSG00000218018	AL109955.1	-3.89688	0.0133279	0.0993321
ENSG00000127561	SYNGR3	-3.89288	0.00310178	0.034266
ENSG00000049130	KITLG	-0.672275	0.671152	0.873574
ENSG00000049167	ERCC8	-0.934946	0.296248	0.627611
ENSG00000049239	H6PD	0.0425714	0.883637	0.95851
ENSG00000147166	ITGB1BP2	-3.88736	0.0123054	0.0938524
ENSG00000049323	LTBP1	0.102191	0.883526	0.95851
ENSG00000049449	RCN1	-0.154727	0.544134	0.809549
ENSG00000049540	ELN	-1.23236	0.571591	0.824986
ENSG00000123485	HJURP	-3.88272	0.00403299	0.0418034
ENSG00000049618	ARID1B	0.0882441	0.694959	0.881657
ENSG00000049656	CLPTM1L	-0.186801	0.198277	0.514232
ENSG00000049759	NEDD4L	-0.173888	0.837567	0.941809
ENSG00000049768	FOXP3	0.288732	0.620076	0.850533
ENSG00000049769	PPP1R3F	0.55414	0.329161	0.657807
ENSG00000049860	HEXB	-0.230315	0.482455	0.770188
ENSG00000049883	PTCD2	-0.17878	0.840737	0.942939
ENSG00000159200	RCAN1	-3.87742	0.000897349	0.0130548
ENSG00000080823	MOK	-3.87246	0.00422991	0.0433906
ENSG00000050393	MCUR1	-0.247416	0.452139	0.74942
ENSG00000050405	LIMA1	0.00144598	0.997879	0.998937
ENSG00000121753	ADGRB2	-3.87061	0.00885916	0.0749127
ENSG00000204380	PKP4-AS1	-3.86475	0.0352334	0.191114
ENSG00000050555	LAMC3	-0.929321	0.324058	0.654117
ENSG00000267688	KF456478.1	-3.85917	0.112469	0.38245
ENSG00000255422	AP002954.1	-3.85647	0.0159431	0.113078
ENSG00000051009	FAM160A2	0.0883192	0.787065	0.920526
ENSG00000051108	HERPUD1	0.581725	0.518906	0.793983
ENSG00000051128	HOMER3	0.119931	0.465813	0.758357
ENSG00000158158	CNNM4	-3.8524	0.00439237	0.0445835
ENSG00000051341	POLQ	-0.921037	0.240021	0.563493
ENSG00000051382	PIK3CB	-0.0991281	0.730719	0.898144
ENSG00000263171	AC026954.3	-3.84741	0.00889417	0.0750096
ENSG00000139354	GAS2L3	-3.82071	0.0155638	0.11135
ENSG00000051620	HEBP2	0.116185	0.622236	0.850931
ENSG00000072571	HMMR	-3.81052	9.65007e-05	0.00207021
ENSG00000052126	PLEKHA5	-0.0176307	0.989598	0.996016
ENSG00000052723	SIKE1	-0.267415	0.659212	0.867345
ENSG00000052749	RRP12	-0.333846	0.325056	0.654853
ENSG00000052795	FNIP2	0.216745	0.780108	0.918382
ENSG00000052802	MSMO1	-0.455957	0.491892	0.777485
ENSG00000052841	TTC17	-0.141463	0.656978	0.866336
ENSG00000119699	TGFB3	-3.80946	0.0254158	0.153837
ENSG00000053371	AKR7A2	-0.315852	0.290913	0.621654
ENSG00000053372	MRTO4	-0.275892	0.271734	0.598504
ENSG00000244486	SCARF2	-3.80826	0.00739202	0.0656619
ENSG00000053524	MCF2L2	-0.108484	0.895866	0.963881
ENSG00000053702	NRIP2	-0.573146	0.659763	0.867388
ENSG00000053770	AP5M1	-0.196557	0.449825	0.747484
ENSG00000053900	ANAPC4	-0.603502	0.467614	0.759372
ENSG00000011426	ANLN	-3.80732	0.00110836	0.0154408
ENSG00000054116	TRAPPC3	0.0374652	0.852767	0.947581
ENSG00000054118	THRAP3	-0.318335	0.200393	0.516479
ENSG00000229676	ZNF492	-3.79887	0.0185121	0.124795
ENSG00000054219	LY75	0.456037	0.454134	0.75076
ENSG00000168661	ZNF30	-3.79772	0.0223951	0.142008
ENSG00000054277	OPN3	0.465749	0.273478	0.601262
ENSG00000054282	SDCCAG8	-0.224404	0.547856	0.811652
ENSG00000054392	HHAT	-0.156376	0.876486	0.955972
ENSG00000054523	KIF1B	0.180137	0.736983	0.899774
ENSG00000265194	AL359922.2	-3.78866	0.0239068	0.148349
ENSG00000261159	AC112484.4	-3.78504	0.0174003	0.119514
ENSG00000054690	PLEKHH1	0.594636	0.588571	0.833031
ENSG00000054793	ATP9A	-0.576177	0.564218	0.82055
ENSG00000054965	FAM168A	-0.267121	0.435748	0.738961
ENSG00000054967	RELT	-0.205766	0.423163	0.729651
ENSG00000054983	GALC	0.288664	0.778392	0.918119
ENSG00000055044	NOP58	-0.186326	0.440598	0.741739
ENSG00000055070	SZRD1	0.197849	0.207226	0.525477
ENSG00000055130	CUL1	0.248535	0.579231	0.828925
ENSG00000055147	FAM114A2	-0.00514335	0.987975	0.996016
ENSG00000101639	CEP192	-3.77656	8.18322e-05	0.00181616
ENSG00000055208	TAB2	-0.301046	0.341549	0.666725
ENSG00000055211	GINM1	-0.2965	0.507477	0.787426
ENSG00000055332	EIF2AK2	-0.125788	0.746733	0.904482
ENSG00000055483	USP36	-0.137225	0.579928	0.829119
ENSG00000143228	NUF2	-3.76834	0.00100962	0.0144046
ENSG00000055917	PUM2	-0.203456	0.313863	0.644973
ENSG00000055950	MRPL43	0.265317	0.32988	0.658388
ENSG00000279348	AC012513.3	-3.7604	0.111871	0.381498
ENSG00000056097	ZFR	-0.158237	0.671485	0.873776
ENSG00000102878	HSF4	-3.74949	0.00574709	0.0544536
ENSG00000056558	TRAF1	0.305354	0.686743	0.879523
ENSG00000056586	RC3H2	-0.491146	0.536689	0.805059
ENSG00000274213	AC015912.3	-3.7492	0.0219405	0.139869
ENSG00000056972	TRAF3IP2	0.766147	0.225625	0.547077
ENSG00000056998	GYG2	-0.904001	0.383061	0.701267
ENSG00000057019	DCBLD2	0.397454	0.517932	0.793245
ENSG00000057252	SOAT1	-0.855994	0.31244	0.643821
ENSG00000057608	GDI2	0.137658	0.40024	0.714017
ENSG00000057657	PRDM1	-1.58781	0.392289	0.709227
ENSG00000057663	ATG5	0.277916	0.471663	0.76286
ENSG00000007968	E2F2	-3.74146	2.38391e-05	0.000658628
ENSG00000136828	RALGPS1	-3.73928	0.113612	0.384104
ENSG00000149503	INCENP	-3.73704	1.03994e-05	0.000331279
ENSG00000269378	ITGB1P1	-3.73524	0.0429038	0.215554
ENSG00000058063	ATP11B	-0.458058	0.417638	0.725054
ENSG00000058091	CDK14	-0.0696408	0.887221	0.960085
ENSG00000058262	SEC61A1	-0.0288336	0.879411	0.956903
ENSG00000101017	CD40	-3.72879	0.0841167	0.323026
ENSG00000137812	KNL1	-3.72802	9.41747e-05	0.00203211
ENSG00000058453	CROCC	-0.027094	0.948649	0.981839
ENSG00000257582	LINC01475	-3.72563	0.000326762	0.00572939
ENSG00000269535	AC010320.4	-3.72305	0.0249906	0.152384
ENSG00000058729	RIOK2	0.149919	0.734373	0.899036
ENSG00000058799	YIPF1	0.209018	0.53024	0.801095
ENSG00000065328	MCM10	-3.72288	2.81073e-05	0.000751274
ENSG00000058866	DGKG	-0.900175	0.303929	0.636013
ENSG00000248924	AC139713.1	-3.71701	0.0349682	0.190164
ENSG00000059145	UNKL	0.11046	0.751945	0.906958
ENSG00000259363	AC090825.1	-3.7168	0.0750725	0.30335
ENSG00000059378	PARP12	0.596862	0.230801	0.554085
ENSG00000198945	L3MBTL3	-3.70823	0.00467122	0.0465622
ENSG00000215067	ALOX12-AS1	-3.70721	0.0411158	0.210165
ENSG00000059691	GATB	-0.344636	0.373988	0.694549
ENSG00000012171	SEMA3B	-3.69599	0.0389116	0.203449
ENSG00000059758	CDK17	-0.861429	0.427199	0.732554
ENSG00000059769	DNAJC25	-0.440978	0.62497	0.851556
ENSG00000138193	PLCE1	-3.69204	0.0346966	0.189243
ENSG00000059915	PSD	-0.334281	0.56323	0.820058
ENSG00000060069	CTDP1	0.304593	0.202514	0.519319
ENSG00000272195	AL356512.1	-3.69174	0.0590524	0.261177
ENSG00000137807	KIF23	-3.6881	0.000122713	0.00255828
ENSG00000060237	WNK1	-0.487668	0.210541	0.529433
ENSG00000151693	ASAP2	-3.68525	0.0053749	0.0518919
ENSG00000153064	BANK1	-3.68194	0.0523033	0.242882
ENSG00000060558	GNA15	-0.108202	0.531148	0.80152
ENSG00000060642	PIGV	-0.261517	0.67951	0.877421
ENSG00000060656	PTPRU	-0.967487	0.562568	0.819809
ENSG00000255118	AP003306.2	-3.67872	0.0498968	0.235782
ENSG00000060749	QSER1	-0.651076	0.428257	0.73307
ENSG00000060762	MPC1	-0.60686	0.289705	0.619898
ENSG00000060971	ACAA1	0.0679941	0.803083	0.927044
ENSG00000279656	AL132780.4	-3.67709	0.088517	0.332275
ENSG00000061273	HDAC7	0.0237502	0.92081	0.972508
ENSG00000061656	SPAG4	0.247942	0.776114	0.917079
ENSG00000061794	MRPS35	-0.00555494	0.980579	0.993565
ENSG00000061918	GUCY1B3	-2.07888	0.214558	0.5342
ENSG00000061936	SFSWAP	-0.1352	0.656306	0.865994
ENSG00000061938	TNK2	0.0663881	0.734689	0.899117
ENSG00000061987	MON2	-0.676885	0.419359	0.726638
ENSG00000062194	GPBP1	-0.318701	0.300913	0.632696
ENSG00000224101	ELMO1-AS1	-3.67537	0.0258013	0.155281
ENSG00000062485	CS	-0.22113	0.318769	0.649646
ENSG00000062524	LTK	0.525578	0.444543	0.74465
ENSG00000062598	ELMO2	-0.231491	0.743734	0.902868
ENSG00000062650	WAPL	-0.195671	0.575988	0.827024
ENSG00000181450	ZNF678	-3.67512	0.0026528	0.0305514
ENSG00000062725	APPBP2	-0.628243	0.371535	0.692763
ENSG00000139193	CD27	-3.67384	0.0120551	0.0926596
ENSG00000105479	CCDC114	-3.67013	0.0146132	0.106475
ENSG00000063169	BICRA	-0.47029	0.187516	0.500484
ENSG00000063176	SPHK2	0.131062	0.681564	0.877938
ENSG00000228801	AC064807.1	-3.66687	0.014444	0.105379
ENSG00000063180	CA11	-0.063586	0.942143	0.979725
ENSG00000063241	ISOC2	-0.118224	0.704432	0.885872
ENSG00000167281	RBFOX3	-3.66601	0.075212	0.303497
ENSG00000170264	FAM161A	-3.65961	0.0154508	0.110781
ENSG00000112874	NUDT12	-3.65277	0.0582496	0.258926
ENSG00000147138	GPR174	-3.65187	0.0538051	0.246756
ENSG00000219201	AC138392.1	-3.64456	0.0402195	0.207427
ENSG00000063601	MTMR1	-1.02486	0.234001	0.556903
ENSG00000155893	PXYLP1	-3.64416	0.0210924	0.136195
ENSG00000063761	ADCK1	-0.0166418	0.975364	0.991736
ENSG00000133069	TMCC2	-3.64353	0.011449	0.0893024
ENSG00000063978	RNF4	-0.0888392	0.782119	0.918447
ENSG00000064012	CASP8	-0.294927	0.485618	0.772711
ENSG00000064102	INTS13	-0.210739	0.659196	0.867345
ENSG00000171695	LKAAEAR1	-3.64268	0.0047195	0.0468741
ENSG00000064199	SPA17	0.226421	0.914458	0.970294
ENSG00000184923	NUTM2A	-3.63084	0.0959267	0.347608
ENSG00000176124	DLEU1	-3.62901	0.0220306	0.140239
ENSG00000120645	IQSEC3	-3.61999	0.0154134	0.110649
ENSG00000138180	CEP55	-3.61983	7.26338e-05	0.00164159
ENSG00000064393	HIPK2	0.0461907	0.916446	0.970796
ENSG00000064419	TNPO3	-0.597913	0.391791	0.708921
ENSG00000143476	DTL	-3.61856	4.47983e-05	0.00112083
ENSG00000064545	TMEM161A	-0.920219	0.222674	0.543753
ENSG00000064547	LPAR2	0.163507	0.550672	0.813543
ENSG00000116771	AGMAT	-3.61526	0.0316196	0.177492
ENSG00000227495	AC004771.1	-3.61245	0.0545343	0.248465
ENSG00000167363	FN3K	-3.60769	0.0353369	0.191447
ENSG00000064652	SNX24	0.107133	0.944635	0.980385
ENSG00000214900	LINC01588	-3.60251	0.0511514	0.240092
ENSG00000064687	ABCA7	0.268383	0.227612	0.549908
ENSG00000075043	KCNQ2	-3.60142	0.119241	0.394555
ENSG00000064726	BTBD1	0.149467	0.632782	0.854482
ENSG00000277959	AL162274.2	-3.59475	0.0552444	0.250529
ENSG00000234789	AL590369.1	-3.59323	0.0225565	0.142787
ENSG00000064932	SBNO2	-0.0597989	0.792698	0.923861
ENSG00000224635	AL391095.1	-3.58593	0.0330995	0.183169
ENSG00000064961	HMG20B	0.126683	0.382624	0.701142
ENSG00000064989	CALCRL	-2.0143	0.270956	0.598043
ENSG00000064995	TAF11	-0.383419	0.38823	0.705105
ENSG00000154839	SKA1	-3.58431	8.99603e-07	3.93403e-05
ENSG00000065000	AP3D1	-0.0278155	0.885539	0.959054
ENSG00000197296	FITM2	-3.57712	0.0168224	0.116936
ENSG00000065054	SLC9A3R2	-0.408003	0.441714	0.742182
ENSG00000065057	NTHL1	0.0026222	0.995682	0.998045
ENSG00000255561	FDXACB1	-3.57146	0.00461394	0.0461426
ENSG00000065135	GNAI3	0.120639	0.538463	0.805506
ENSG00000140945	CDH13	-3.56802	0.0427363	0.214945
ENSG00000065154	OAT	0.0426952	0.897559	0.964111
ENSG00000065183	WDR3	-0.608763	0.300009	0.631785
ENSG00000065243	PKN2	-0.207122	0.793923	0.924327
ENSG00000065268	WDR18	-0.0390916	0.882395	0.95823
ENSG00000065308	TRAM2	-0.374322	0.646706	0.862255
ENSG00000174370	C11orf45	-3.56431	0.0295966	0.169824
ENSG00000257176	AC009318.1	-3.56009	0.0606165	0.265883
ENSG00000065357	DGKA	-0.044045	0.926623	0.974324
ENSG00000065413	ANKRD44	-0.415834	0.718927	0.891781
ENSG00000256660	CLEC12B	-3.55991	0.0940137	0.343905
ENSG00000095951	HIVEP1	-3.55074	0.00531301	0.051395
ENSG00000104450	SPAG1	-3.54711	0.0156645	0.111692
ENSG00000065491	TBC1D22B	-0.215269	0.69197	0.880776
ENSG00000159403	C1R	-3.53873	0.0312804	0.176001
ENSG00000259052	AL157871.6	-3.5355	0.0455559	0.223634
ENSG00000065534	MYLK	0.824339	0.386664	0.70436
ENSG00000138336	TET1	-3.52965	0.0560102	0.252944
ENSG00000065559	MAP2K4	-0.201367	0.607228	0.843949
ENSG00000065600	TMEM206	-0.457854	0.534643	0.80384
ENSG00000065613	SLK	-0.166005	0.708083	0.887532
ENSG00000065615	CYB5R4	-0.0460719	0.86413	0.95231
ENSG00000077152	UBE2T	-3.52785	0.00112797	0.0156628
ENSG00000065665	SEC61A2	-0.135828	0.784917	0.919906
ENSG00000233296	AC092159.2	-3.52755	0.0246645	0.151398
ENSG00000065802	ASB1	-0.258787	0.375726	0.695801
ENSG00000228275	ARMCX3-AS1	-3.51645	0.0576549	0.257228
ENSG00000144554	FANCD2	-3.51449	0.000189651	0.00365481
ENSG00000065882	TBC1D1	-0.149643	0.392877	0.709656
ENSG00000065883	CDK13	-0.297388	0.408484	0.719072
ENSG00000065911	MTHFD2	-0.217895	0.472667	0.763653
ENSG00000065923	SLC9A7	0.130167	0.802129	0.926831
ENSG00000065970	FOXJ2	-0.548913	0.312485	0.643821
ENSG00000092853	CLSPN	-3.51062	0.000170128	0.00335657
ENSG00000066027	PPP2R5A	0.0314514	0.883091	0.958368
ENSG00000259668	AC066613.1	-3.50524	0.0667031	0.283316
ENSG00000066056	TIE1	0.460344	0.335199	0.66224
ENSG00000066084	DIP2B	0.295749	0.326285	0.655718
ENSG00000138182	KIF20B	-3.50384	0.00213464	0.0259475
ENSG00000253552	HOXA-AS2	-3.50205	0.00341673	0.0369984
ENSG00000237786	GFOD1-AS1	-3.4914	0.10048	0.35736
ENSG00000066230	SLC9A3	-0.153086	0.87308	0.955097
ENSG00000126016	AMOT	-3.48908	0.0256505	0.154877
ENSG00000100197	CYP2D6	-3.48841	0.0413737	0.21095
ENSG00000066322	ELOVL1	0.0634128	0.822342	0.935074
ENSG00000272034	SNORD14A	-3.4868	0.0574621	0.256756
ENSG00000066379	ZNRD1	-0.273948	0.426029	0.732168
ENSG00000066422	ZBTB11	-0.383969	0.596007	0.837095
ENSG00000066427	ATXN3	0.331048	0.295629	0.627559
ENSG00000066455	GOLGA5	-0.0743055	0.929441	0.974676
ENSG00000066557	LRRC40	-0.465983	0.253739	0.578629
ENSG00000066583	ISOC1	-0.315063	0.656956	0.866336
ENSG00000257359	AC073863.1	-3.47853	0.0497944	0.235448
ENSG00000066654	THUMPD1	0.00730773	0.979227	0.992999
ENSG00000066697	MSANTD3	-0.0345896	0.937444	0.977666
ENSG00000152380	FAM151B	-3.47791	0.103316	0.36281
ENSG00000066777	ARFGEF1	-0.400407	0.281305	0.6108
ENSG00000066827	ZFAT	-0.524801	0.506487	0.786836
ENSG00000240990	HOXA11-AS	-3.47665	0.00193429	0.0240258
ENSG00000121152	NCAPH	-3.47525	0.000703647	0.0106684
ENSG00000170417	TMEM182	-3.47207	0.0336447	0.185215
ENSG00000066933	MYO9A	-0.562251	0.338473	0.664612
ENSG00000171119	NRTN	-3.47152	0.037968	0.200161
ENSG00000256546	AC156455.1	-3.4656	0.0253163	0.153617
ENSG00000067066	SP100	0.233169	0.412455	0.721309
ENSG00000067082	KLF6	0.24292	0.584929	0.831411
ENSG00000067113	PLPP1	0.384365	0.315009	0.645521
ENSG00000189269	DRICH1	-3.46327	0.0753772	0.303832
ENSG00000067167	TRAM1	0.0236839	0.894515	0.963404
ENSG00000228589	SPCS2P4	-3.45799	0.10827	0.373998
ENSG00000251023	AC114980.1	-3.45277	0.072691	0.297574
ENSG00000067191	CACNB1	-1.72092	0.217501	0.537157
ENSG00000067208	EVI5	1.09311	0.246272	0.570914
ENSG00000067221	STOML1	-0.333684	0.439097	0.740897
ENSG00000262484	CCER2	-3.44616	0.0249577	0.152375
ENSG00000067248	DHX29	-0.775576	0.364215	0.68524
ENSG00000067334	DNTTIP2	-0.178798	0.527305	0.799294
ENSG00000067365	METTL22	0.250897	0.361326	0.68366
ENSG00000067369	TP53BP1	0.196808	0.489719	0.776085
ENSG00000174175	SELP	-3.43573	7.13607e-07	3.22571e-05
ENSG00000125144	MT1G	-3.43469	0.0532424	0.245188
ENSG00000067596	DHX8	-0.0784942	0.801505	0.926623
ENSG00000067601	PMS2P4	-0.223003	0.882185	0.958183
ENSG00000119969	HELLS	-3.43366	0.000692914	0.0105587
ENSG00000116815	CD58	-3.43137	0.000382166	0.00647798
ENSG00000163959	SLC51A	-3.42608	0.012742	0.0964359
ENSG00000067836	ROGDI	-0.177679	0.877701	0.95624
ENSG00000134253	TRIM45	-3.42538	0.0470761	0.228291
ENSG00000211592	IGKC	-3.42534	0.0421031	0.212907
ENSG00000067992	PDK3	-0.25419	0.738548	0.90018
ENSG00000187479	C11orf96	-3.42463	0.0215041	0.137972
ENSG00000068024	HDAC4	-0.41647	0.328398	0.657463
ENSG00000068028	RASSF1	0.125262	0.624961	0.851556
ENSG00000284649	AC009093.8	-3.42416	0.0726327	0.297537
ENSG00000229980	TOB1-AS1	-3.41741	0.080276	0.314904
ENSG00000068097	HEATR6	0.0774943	0.85688	0.949007
ENSG00000111665	CDCA3	-3.40827	1.27257e-05	0.000390245
ENSG00000068137	PLEKHH3	-0.228173	0.813197	0.931195
ENSG00000068305	MEF2A	0.0920053	0.790704	0.922791
ENSG00000271788	AC008875.1	-3.40752	0.100436	0.357292
ENSG00000068323	TFE3	0.216809	0.293012	0.6246
ENSG00000269680	AC008760.1	-3.40607	0.06062	0.265883
ENSG00000068366	ACSL4	-0.00506429	0.989652	0.996016
ENSG00000068383	INPP5A	0.202883	0.615918	0.848393
ENSG00000068394	GPKOW	-0.498652	0.21583	0.535265
ENSG00000260874	AC106820.5	-3.40222	0.00576225	0.054504
ENSG00000171680	PLEKHG5	-3.39406	0.166899	0.471148
ENSG00000143195	ILDR2	-3.39395	0.133315	0.417044
ENSG00000076382	SPAG5	-3.39286	7.13623e-07	3.22571e-05
ENSG00000180592	SKIDA1	-3.39263	0.000296611	0.00528218
ENSG00000225648	SBDSP1	-3.39	0.00755263	0.0667277
ENSG00000068724	TTC7A	0.170282	0.350584	0.67453
ENSG00000271913	AL035530.2	-3.3851	0.0270797	0.160749
ENSG00000126790	L3HYPDH	-3.38491	0.0195977	0.129608
ENSG00000274373	AC148476.1	-3.37241	0.0123523	0.0941298
ENSG00000100526	CDKN3	-3.36832	7.25384e-06	0.000243952
ENSG00000068878	PSME4	-0.111641	0.621103	0.850931
ENSG00000068885	IFT80	-1.25529	0.278849	0.607646
ENSG00000068903	SIRT2	0.199671	0.757599	0.909229
ENSG00000068912	ERLEC1	0.115625	0.738027	0.899937
ENSG00000068971	PPP2R5B	-0.457838	0.703433	0.885872
ENSG00000068976	PYGM	-0.830841	0.596292	0.837335
ENSG00000069011	PITX1	1.09456	0.435159	0.738641
ENSG00000069020	MAST4	0.806606	0.305016	0.637235
ENSG00000069188	SDK2	0.900896	0.432377	0.736372
ENSG00000170312	CDK1	-3.36681	1.09407e-07	6.21981e-06
ENSG00000232335	AL354864.1	-3.36531	0.0940905	0.343905
ENSG00000069329	VPS35	0.185469	0.466098	0.758444
ENSG00000069345	DNAJA2	-0.0889135	0.813437	0.93131
ENSG00000069399	BCL3	-0.0124097	0.963425	0.986176
ENSG00000248445	SEMA6A-AS1	-3.35474	0.0392155	0.203956
ENSG00000069482	GAL	-2.03188	0.373181	0.694052
ENSG00000069493	CLEC2D	0.593566	0.524274	0.797171
ENSG00000069509	FUNDC1	-1.08449	0.217976	0.537654
ENSG00000069696	DRD4	0.396086	0.608714	0.844113
ENSG00000069849	ATP1B3	-0.080094	0.801571	0.926623
ENSG00000069869	NEDD4	-0.304428	0.480329	0.768714
ENSG00000069943	PIGB	-0.181206	0.711398	0.888573
ENSG00000069956	MAPK6	-0.602888	0.437228	0.739774
ENSG00000069966	GNB5	0.145551	0.724254	0.895083
ENSG00000184661	CDCA2	-3.35377	0.00811012	0.0704607
ENSG00000069998	HDHD5	-0.278622	0.327345	0.65684
ENSG00000070010	UFD1	0.244837	0.260833	0.58735
ENSG00000245768	AC092378.1	-3.34963	0.041347	0.210941
ENSG00000148773	MKI67	-3.34918	1.25363e-23	1.85299e-20
ENSG00000115163	CENPA	-3.34758	1.4606e-05	0.000440594
ENSG00000070182	SPTB	-1.10579	0.353263	0.676545
ENSG00000070190	DAPP1	0.482216	0.345403	0.670141
ENSG00000070214	SLC44A1	0.259414	0.304095	0.636013
ENSG00000070269	TMEM260	-0.155557	0.77891	0.918327
ENSG00000070366	SMG6	0.132985	0.620032	0.850533
ENSG00000070367	EXOC5	-0.341877	0.25773	0.583118
ENSG00000070371	CLTCL1	-1.80855	0.206938	0.525107
ENSG00000070404	FSTL3	0.425254	0.265276	0.591763
ENSG00000070413	DGCR2	-0.143292	0.482839	0.770606
ENSG00000070423	RNF126	-0.229848	0.339365	0.665142
ENSG00000260007	AC107871.1	-3.34125	0.0325827	0.181532
ENSG00000070476	ZXDC	-0.187341	0.461387	0.754732
ENSG00000254307	AP003692.1	-3.33197	0.0110581	0.0873128
ENSG00000070501	POLB	0.784342	0.338562	0.664612
ENSG00000145386	CCNA2	-3.33061	0.00227384	0.0271922
ENSG00000070610	GBA2	0.344852	0.315132	0.645531
ENSG00000070614	NDST1	0.0159375	0.95709	0.984594
ENSG00000070718	AP3M2	-0.44789	0.621584	0.850931
ENSG00000054598	FOXC1	-3.32288	7.55125e-07	3.38227e-05
ENSG00000070759	TESK2	0.423508	0.475617	0.765712
ENSG00000258034	AC012157.1	-3.31982	0.0563362	0.253333
ENSG00000070770	CSNK2A2	0.13672	0.718678	0.891781
ENSG00000070785	EIF2B3	-0.722919	0.363609	0.685193
ENSG00000253540	FAM86HP	-3.30699	0.0373976	0.198202
ENSG00000070831	CDC42	-0.0543842	0.788971	0.921516
ENSG00000070882	OSBPL3	-0.44551	0.271509	0.598355
ENSG00000262877	AC110285.2	-3.3053	0.000253708	0.00466425
ENSG00000070961	ATP2B1	-0.347451	0.376307	0.695984
ENSG00000071051	NCK2	-0.165679	0.664854	0.869778
ENSG00000071054	MAP4K4	0.145395	0.432353	0.736372
ENSG00000071073	MGAT4A	0.363691	0.414284	0.722491
ENSG00000067141	NEO1	-3.30411	0.123122	0.400291
ENSG00000271971	AC120053.1	-3.29721	0.062701	0.271784
ENSG00000071189	SNX13	-0.131252	0.859749	0.950297
ENSG00000071205	ARHGAP10	-0.293836	0.774937	0.916512
ENSG00000071242	RPS6KA2	-0.209713	0.880619	0.957583
ENSG00000071243	ING3	-0.620428	0.438349	0.740701
ENSG00000071246	VASH1	0.244073	0.527509	0.799294
ENSG00000071462	BUD23	0.00768449	0.976525	0.992028
ENSG00000071537	SEL1L	-0.160141	0.712079	0.888882
ENSG00000185684	EP400NL	-3.29704	0.00597103	0.056108
ENSG00000071553	ATP6AP1	0.0745076	0.727052	0.896466
ENSG00000188199	NUTM2B	-3.29698	0.119996	0.395907
ENSG00000071575	TRIB2	0.958769	0.509063	0.788137
ENSG00000134323	MYCN	-3.29384	6.92118e-07	3.16724e-05
ENSG00000071655	MBD3	0.1343	0.54447	0.809557
ENSG00000258741	AC091544.3	-3.29349	0.0303559	0.172373
ENSG00000073598	FNDC8	-3.29033	0.0229286	0.144401
ENSG00000177602	HASPIN	-3.28653	0.00124787	0.0169529
ENSG00000071894	CPSF1	-0.172171	0.379775	0.699321
ENSG00000071967	CYBRD1	0.187425	0.597259	0.837934
ENSG00000065485	PDIA5	-3.27772	0.00154533	0.0201958
ENSG00000232600	TONSL-AS1	-3.27681	0.0706346	0.292943
ENSG00000072062	PRKACA	-0.216479	0.652975	0.864283
ENSG00000133794	ARNTL	-3.27519	0.00589773	0.0555959
ENSG00000257038	AP002761.3	-3.27032	0.0645637	0.276854
ENSG00000072121	ZFYVE26	0.331631	0.443415	0.743642
ENSG00000072135	PTPN18	0.195046	0.511357	0.789221
ENSG00000072163	LIMS2	-0.911344	0.514469	0.791264
ENSG00000072195	SPEG	0.171412	0.827223	0.936949
ENSG00000072201	LNX1	0.0762189	0.837381	0.941743
ENSG00000072210	ALDH3A2	0.0862913	0.865951	0.95231
ENSG00000274386	TMEM269	-3.26839	0.0515692	0.240987
ENSG00000237520	AL391832.1	-3.26829	0.0164974	0.115411
ENSG00000072364	AFF4	-0.488138	0.405853	0.718432
ENSG00000072401	UBE2D1	-0.00495643	0.992269	0.996652
ENSG00000072415	MPP5	-0.627998	0.630728	0.853881
ENSG00000072422	RHOBTB1	0.842205	0.340443	0.665458
ENSG00000175768	TOMM5	-3.25802	0.0682906	0.287579
ENSG00000072506	HSD17B10	-0.372716	0.199409	0.515472
ENSG00000261226	AC092384.3	-3.25792	0.0790285	0.312331
ENSG00000242349	NPPA-AS1	-3.25591	0.0646639	0.277043
ENSG00000227741	AL121987.2	-3.2497	0.0390985	0.203751
ENSG00000072682	P4HA2	1.18332	0.413205	0.721765
ENSG00000272438	AL645608.7	-3.24769	0.0254138	0.153837
ENSG00000072736	NFATC3	0.0235609	0.909847	0.968457
ENSG00000072756	TRNT1	-0.643322	0.199502	0.515622
ENSG00000107614	TRDMT1	-3.23706	0.00301049	0.0335328
ENSG00000198734	F5	-3.23575	0.0954533	0.346648
ENSG00000072803	FBXW11	0.375824	0.366047	0.686871
ENSG00000256262	USP30-AS1	-3.23198	0.14876	0.443489
ENSG00000072832	CRMP1	-0.00178609	0.999255	0.999562
ENSG00000072849	DERL2	0.0250047	0.944399	0.980385
ENSG00000072858	SIDT1	-0.242264	0.886745	0.959811
ENSG00000198901	PRC1	-3.216	2.31507e-05	0.000645928
ENSG00000072952	MRVI1	-0.510321	0.78143	0.918382
ENSG00000277744	AC011462.4	-3.20103	0.0329256	0.182651
ENSG00000073008	PVR	-0.0522013	0.897821	0.964299
ENSG00000073050	XRCC1	-0.168	0.570889	0.824618
ENSG00000073060	SCARB1	-0.304377	0.198237	0.514232
ENSG00000274070	CASTOR2	-3.19526	0.104155	0.36464
ENSG00000244734	HBB	-3.1895	0.0964242	0.348798
ENSG00000138160	KIF11	-3.18907	8.48629e-09	6.56732e-07
ENSG00000073331	ALPK1	0.0375255	0.952595	0.983193
ENSG00000134461	ANKRD16	-3.18654	0.000385115	0.00651302
ENSG00000073417	PDE8A	-0.386402	0.501028	0.782429
ENSG00000073536	NLE1	-0.21677	0.525536	0.797648
ENSG00000275120	AC048382.5	-3.18613	0.0113871	0.089026
ENSG00000260500	AC010336.2	-3.18522	0.039925	0.206629
ENSG00000104412	EMC2	-3.18253	0.0141919	0.104156
ENSG00000073605	GSDMB	0.00472361	0.996268	0.998294
ENSG00000073614	KDM5A	-0.054331	0.848429	0.946137
ENSG00000073670	ADAM11	0.43905	0.693009	0.881041
ENSG00000073711	PPP2R3A	1.26613	0.201819	0.518436
ENSG00000261542	AC011978.2	-3.175	0.136879	0.422727
ENSG00000073792	IGF2BP2	-0.0335697	0.911041	0.968827
ENSG00000073803	MAP3K13	0.415296	0.431566	0.736007
ENSG00000073849	ST6GAL1	-0.404633	0.392768	0.709633
ENSG00000237004	ZNRF2P1	-3.17429	0.0734668	0.299562
ENSG00000187800	PEAR1	-3.17043	0.113942	0.384602
ENSG00000073969	NSF	0.0957539	0.799469	0.925445
ENSG00000249035	CLMAT3	-3.1613	0.147412	0.440984
ENSG00000074071	MRPS34	0.195145	0.438651	0.740869
ENSG00000074181	NOTCH3	0.594065	0.663258	0.869113
ENSG00000074201	CLNS1A	-0.281754	0.214092	0.533732
ENSG00000074219	TEAD2	1.44642	0.302528	0.634579
ENSG00000123870	ZNF137P	-3.1606	0.118489	0.39313
ENSG00000102010	BMX	-3.15898	0.0069596	0.0628801
ENSG00000139734	DIAPH3	-3.15553	0.0082773	0.0711318
ENSG00000248710	AC079594.2	-3.14996	0.00569584	0.0541416
ENSG00000074416	MGLL	0.122542	0.760509	0.910868
ENSG00000254598	CSNK2A3	-3.14853	0.064908	0.277927
ENSG00000279140	AL590326.2	-3.14845	0.0702196	0.292124
ENSG00000074621	SLC24A1	-0.0492272	0.906986	0.967233
ENSG00000129173	E2F8	-3.14776	0.00291029	0.0327874
ENSG00000175764	TTLL11	-3.14137	0.0209682	0.135756
ENSG00000229153	EPHA1-AS1	-3.13997	0.0163801	0.115128
ENSG00000256576	LINC02361	-3.13744	0.111286	0.380239
ENSG00000074706	IPCEF1	-1.933	0.393606	0.710156
ENSG00000074755	ZZEF1	-0.419939	0.187453	0.500405
ENSG00000074800	ENO1	-0.0651259	0.715121	0.890904
ENSG00000074842	MYDGF	-0.0141931	0.950636	0.982474
ENSG00000074855	ANO8	-0.282586	0.707438	0.887284
ENSG00000074935	TUBE1	-0.240144	0.803831	0.927199
ENSG00000074966	TXK	-1.97324	0.239699	0.563307
ENSG00000050438	SLC4A8	-3.13647	0.0109543	0.0869825
ENSG00000075089	ACTR6	-0.674933	0.532147	0.802064
ENSG00000089685	BIRC5	-3.13554	0.0029939	0.0334159
ENSG00000075142	SRI	0.053601	0.853893	0.947908
ENSG00000257303	AC073896.2	-3.13448	0.0133397	0.0993321
ENSG00000075188	NUP37	-0.375996	0.370111	0.690996
ENSG00000227473	TSSK5P	-3.12997	0.0796677	0.313707
ENSG00000075234	TTC38	0.071601	0.77307	0.91561
ENSG00000075239	ACAT1	-0.232301	0.351887	0.675642
ENSG00000075240	GRAMD4	-0.239826	0.459113	0.753854
ENSG00000075275	CELSR1	-0.804026	0.333374	0.66089
ENSG00000075292	ZNF638	-0.282803	0.229362	0.55256
ENSG00000075303	SLC25A40	-0.255923	0.762981	0.911913
ENSG00000075336	TIMM21	-0.322657	0.481178	0.769571
ENSG00000272768	AC004854.2	-3.12896	0.0330067	0.18286
ENSG00000075391	RASAL2	0.431382	0.568651	0.823406
ENSG00000229944	EIF4EP2	-3.12841	0.0480481	0.231109
ENSG00000075407	ZNF37A	-0.457889	0.327073	0.656589
ENSG00000075413	MARK3	0.105509	0.686639	0.879494
ENSG00000162174	ASRGL1	-3.12818	0.00519322	0.0504674
ENSG00000115295	CLIP4	-3.1269	0.0164828	0.115411
ENSG00000075426	FOSL2	0.206806	0.496365	0.779264
ENSG00000165685	TMEM52B	-3.12287	0.014616	0.106475
ENSG00000075568	TMEM131	-0.341757	0.443473	0.743642
ENSG00000119138	KLF9	-3.12269	0.0875393	0.330533
ENSG00000157456	CCNB2	-3.12171	2.18797e-05	0.000618364
ENSG00000075651	PLD1	0.530243	0.20841	0.526762
ENSG00000243422	RPL23AP49	-3.11901	0.0415717	0.211275
ENSG00000075711	DLG1	0.0209713	0.954074	0.98402
ENSG00000151917	BEND6	-3.11755	0.0377014	0.199237
ENSG00000163629	PTPN13	-3.10876	0.0143075	0.104692
ENSG00000238057	ZEB2-AS1	-3.10749	0.0517492	0.241447
ENSG00000246334	PRR7-AS1	-3.10645	0.0516016	0.240987
ENSG00000075884	ARHGAP15	0.236957	0.271039	0.598043
ENSG00000075914	EXOSC7	-0.172664	0.596775	0.837595
ENSG00000075945	KIFAP3	-0.668933	0.432347	0.736372
ENSG00000075975	MKRN2	0.0637022	0.841267	0.943243
ENSG00000161960	EIF4A1	-3.10401	0.0185877	0.125112
ENSG00000076043	REXO2	0.196581	0.711552	0.888598
ENSG00000076053	RBM7	0.224687	0.388743	0.705725
ENSG00000119714	GPR68	-3.10338	0.0802612	0.314904
ENSG00000076108	BAZ2A	-0.101858	0.737467	0.899775
ENSG00000076201	PTPN23	0.154614	0.607602	0.843949
ENSG00000056736	IL17RB	-3.10092	0.035636	0.192169
ENSG00000180747	SMG1P3	-3.09941	0.0726973	0.297574
ENSG00000144395	CCDC150	-3.09937	0.0207105	0.134618
ENSG00000076344	RGS11	-1.76772	0.391772	0.708921
ENSG00000076351	SLC46A1	0.230104	0.650347	0.863497
ENSG00000076356	PLXNA2	0.235657	0.864214	0.95231
ENSG00000269984	AC078795.1	-3.09785	0.0678633	0.286433
ENSG00000197405	C5AR1	-3.09354	0.0943621	0.344551
ENSG00000278156	TSC22D1-AS1	-3.09115	0.0786058	0.311549
ENSG00000076555	ACACB	0.677539	0.439145	0.740897
ENSG00000152154	TMEM178A	-3.08939	0.0939446	0.343905
ENSG00000076641	PAG1	-0.310102	0.714662	0.890904
ENSG00000076650	GPATCH1	0.195252	0.649612	0.863487
ENSG00000198435	NRARP	-3.08656	0.0150948	0.109157
ENSG00000176912	TYMSOS	-3.08426	3.49032e-05	0.000911491
ENSG00000076770	MBNL3	-0.510981	0.283068	0.612591
ENSG00000080947	CROCCP3	-3.08296	0.0162026	0.114315
ENSG00000237311	AL034397.2	-3.08229	0.0799953	0.314588
ENSG00000076944	STXBP2	0.223204	0.427421	0.732659
ENSG00000076984	MAP2K7	-0.0461642	0.861685	0.951057
ENSG00000077044	DGKD	0.0478166	0.823415	0.935816
ENSG00000077097	TOP2B	-0.138334	0.585616	0.831507
ENSG00000263683	AC005154.4	-3.07926	0.048939	0.232898
ENSG00000077150	NFKB2	0.533485	0.232721	0.555441
ENSG00000273061	CDC37L1-AS1	-3.07693	0.0838704	0.322607
ENSG00000077157	PPP1R12B	-0.0601446	0.914198	0.970187
ENSG00000206344	HCG27	-3.0768	0.0617118	0.269392
ENSG00000077235	GTF3C1	-0.176815	0.48493	0.772406
ENSG00000077238	IL4R	-0.148482	0.594988	0.83692
ENSG00000077254	USP33	-0.10318	0.762245	0.911637
ENSG00000103056	SMPD3	-3.07664	0.0380658	0.200446
ENSG00000077348	EXOSC5	0.0914681	0.928589	0.974405
ENSG00000077380	DYNC1I2	0.207587	0.407428	0.718811
ENSG00000077420	APBB1IP	-0.246898	0.212353	0.531886
ENSG00000077454	LRCH4	-0.386506	0.354639	0.677991
ENSG00000169570	DTWD2	-3.0753	0.00987185	0.0807401
ENSG00000144036	EXOC6B	-3.0719	0.0418588	0.212252
ENSG00000108702	CCL1	-3.06727	0.0772529	0.308281
ENSG00000077549	CAPZB	-0.15473	0.318882	0.649765
ENSG00000077585	GPR137B	1.55054	0.306096	0.638179
ENSG00000077684	JADE1	-0.126838	0.775295	0.916624
ENSG00000077713	SLC25A43	-0.314373	0.687241	0.879682
ENSG00000278291	AL161772.1	-3.06662	0.00165371	0.0211999
ENSG00000171848	RRM2	-3.06596	0.00794317	0.069559
ENSG00000077984	CST7	0.595199	0.227136	0.549116
ENSG00000078043	PIAS2	-0.143872	0.727662	0.896665
ENSG00000170522	ELOVL6	-3.06553	0.0202445	0.13258
ENSG00000078070	MCCC1	-0.519338	0.461128	0.754476
ENSG00000078124	ACER3	0.431122	0.239139	0.562673
ENSG00000078140	UBE2K	-0.111691	0.582955	0.830493
ENSG00000078142	PIK3C3	0.12409	0.741695	0.901711
ENSG00000078177	N4BP2	0.348129	0.434181	0.737912
ENSG00000078237	TIGAR	-0.409626	0.733587	0.899036
ENSG00000078246	TULP3	-0.754327	0.531878	0.801886
ENSG00000078269	SYNJ2	-0.0713155	0.857131	0.949007
ENSG00000078304	PPP2R5C	0.353526	0.216452	0.536059
ENSG00000078319	PMS2P1	-0.458315	0.524077	0.797036
ENSG00000111664	GNB3	-3.06456	0.0143064	0.104692
ENSG00000165392	WRN	-3.06337	0.0157982	0.112483
ENSG00000155846	PPARGC1B	-3.05437	0.0266337	0.158547
ENSG00000078487	ZCWPW1	0.0957977	0.845953	0.94527
ENSG00000232450	AL133517.1	-3.0542	0.091966	0.340178
ENSG00000078618	NRDC	-0.0929335	0.640639	0.858494
ENSG00000078668	VDAC3	0.0711155	0.714088	0.890712
ENSG00000078674	PCM1	0.199441	0.511299	0.789213
ENSG00000173083	HPSE	-3.05404	0.00501923	0.0492029
ENSG00000078699	CBFA2T2	-0.156437	0.752928	0.907381
ENSG00000259544	AC021739.4	-3.05325	0.121269	0.397181
ENSG00000078795	PKD2L2	-0.417638	0.666075	0.870568
ENSG00000078804	TP53INP2	-0.756875	0.4446	0.744661
ENSG00000078808	SDF4	-0.0320809	0.866072	0.95231
ENSG00000272644	AC097468.3	-3.05275	0.0686573	0.28822
ENSG00000078900	TP73	-0.277293	0.553358	0.815146
ENSG00000078902	TOLLIP	0.269347	0.242061	0.566394
ENSG00000078967	UBE2D4	0.166933	0.789482	0.92204
ENSG00000140030	GPR65	-3.05267	0.0189941	0.126922
ENSG00000258057	BCDIN3D-AS1	-3.04661	0.0241526	0.149122
ENSG00000079150	FKBP7	-1.04554	0.459116	0.753854
ENSG00000079156	OSBPL6	1.58886	0.341671	0.666748
ENSG00000079215	SLC1A3	0.15208	0.896211	0.963972
ENSG00000263264	AC119396.1	-3.04643	0.0431833	0.216224
ENSG00000079257	LXN	0.644324	0.417414	0.724937
ENSG00000079277	MKNK1	0.145232	0.598219	0.838739
ENSG00000079308	TNS1	-0.610197	0.526102	0.798307
ENSG00000198225	FKBP1C	-3.04301	0.0540284	0.247328
ENSG00000079332	SAR1A	-0.140479	0.685782	0.878993
ENSG00000079335	CDC14A	0.575763	0.614591	0.847492
ENSG00000079337	RAPGEF3	-0.871694	0.200087	0.516322
ENSG00000079387	SENP1	-0.442686	0.448418	0.74674
ENSG00000079432	CIC	-0.248847	0.309413	0.641349
ENSG00000079435	LIPE	0.918364	0.357032	0.679598
ENSG00000079459	FDFT1	-0.0847181	0.742192	0.901796
ENSG00000079462	PAFAH1B3	0.4384	0.208618	0.527014
ENSG00000079482	OPHN1	-1.85967	0.343771	0.66844
ENSG00000277383	AC010331.1	-3.0412	0.079747	0.313912
ENSG00000237036	ZEB1-AS1	-3.04031	0.0159104	0.112931
ENSG00000079739	PGM1	-0.11896	0.704185	0.885872
ENSG00000083290	ULK2	-3.03966	0.0673858	0.285314
ENSG00000079805	DNM2	-0.0171775	0.907508	0.967324
ENSG00000171747	LGALS4	-3.03822	0.101872	0.360317
ENSG00000079950	STX7	0.295929	0.490662	0.77658
ENSG00000079974	RABL2B	0.0434728	0.906438	0.96702
ENSG00000105854	PON2	-3.03622	0.0165166	0.115484
ENSG00000221866	PLXNA4	-3.03472	0.126994	0.406473
ENSG00000080200	CRYBG3	0.186571	0.700754	0.885202
ENSG00000080298	RFX3	0.493713	0.629135	0.852921
ENSG00000080345	RIF1	-0.163527	0.570836	0.824618
ENSG00000080371	RAB21	-0.188944	0.632706	0.854482
ENSG00000080503	SMARCA2	-0.0198521	0.938351	0.977984
ENSG00000080546	SESN1	0.608816	0.196437	0.511773
ENSG00000080603	SRCAP	-1.13908	0.322049	0.652888
ENSG00000080608	PUM3	-0.213048	0.554075	0.815303
ENSG00000080802	CNOT4	-0.127703	0.868485	0.953154
ENSG00000100902	PSMA6	-3.02367	0.0923878	0.340715
ENSG00000080819	CPOX	-1.07716	0.192729	0.506864
ENSG00000080822	CLDND1	-0.0249383	0.957675	0.98486
ENSG00000152253	SPC25	-3.02273	0.00102522	0.014529
ENSG00000226180	AC010536.1	-3.02097	0.0846543	0.324164
ENSG00000179941	BBS10	-3.02056	0.0106199	0.0854044
ENSG00000275004	ZNF280B	-3.01971	0.0595409	0.262866
ENSG00000238184	CD81-AS1	-3.01883	0.0601317	0.264585
ENSG00000272606	AC015982.1	-3.01606	0.10641	0.369922
ENSG00000081014	AP4E1	-0.59654	0.326121	0.655543
ENSG00000081019	RSBN1	0.423373	0.608442	0.843974
ENSG00000081026	MAGI3	-0.65736	0.735325	0.899291
ENSG00000223390	AL445685.1	-3.01401	0.067378	0.285314
ENSG00000081059	TCF7	-0.868849	0.453222	0.750312
ENSG00000081087	OSTM1	0.43984	0.382604	0.701142
ENSG00000117394	SLC2A1	-3.00791	0.00187612	0.0235207
ENSG00000081177	EXD2	-0.474468	0.383352	0.701625
ENSG00000081181	ARG2	0.0134957	0.966162	0.987883
ENSG00000165359	INTS6L	-3.00647	0.0183744	0.124412
ENSG00000081237	PTPRC	-0.256617	0.509428	0.788137
ENSG00000081307	UBA5	-0.403862	0.617274	0.848817
ENSG00000255769	GOLGA2P10	-3.00257	0.138908	0.425798
ENSG00000112029	FBXO5	-2.99916	0.000537476	0.00855159
ENSG00000215784	FAM72D	-2.99878	0.0189157	0.126627
ENSG00000235351	AC114730.3	-2.99642	0.0208905	0.135431
ENSG00000081721	DUSP12	-0.372233	0.585461	0.83147
ENSG00000132744	ACY3	-2.99456	0.118648	0.393399
ENSG00000081791	KIAA0141	0.0693364	0.794291	0.924327
ENSG00000081870	HSPB11	-0.573599	0.489287	0.775733
ENSG00000081913	PHLPP1	0.050316	0.908214	0.967588
ENSG00000081923	ATP8B1	0.555657	0.726938	0.896466
ENSG00000082014	SMARCD3	-0.321165	0.672133	0.874312
ENSG00000082068	WDR70	-0.55895	0.245467	0.570136
ENSG00000241990	PRR34-AS1	-2.99444	0.100074	0.356775
ENSG00000082146	STRADB	0.0747905	0.78975	0.922062
ENSG00000082153	BZW1	-0.0164506	0.936977	0.977516
ENSG00000082196	C1QTNF3	0.682936	0.576703	0.827436
ENSG00000082212	ME2	-0.220626	0.476439	0.766369
ENSG00000082213	C5orf22	-0.540097	0.345012	0.669769
ENSG00000082258	CCNT2	-0.60697	0.194159	0.508711
ENSG00000082269	FAM135A	-0.264615	0.828958	0.937512
ENSG00000082438	COBLL1	-0.498242	0.46567	0.758357
ENSG00000166851	PLK1	-2.98452	7.30837e-13	1.71468e-10
ENSG00000082512	TRAF5	0.344544	0.516966	0.792828
ENSG00000082515	MRPL22	-0.000622107	0.998708	0.999417
ENSG00000082516	GEMIN5	-0.110045	0.749788	0.905812
ENSG00000239335	LLPH-AS1	-2.98231	0.149398	0.444854
ENSG00000082701	GSK3B	-0.0302842	0.924403	0.973958
ENSG00000126787	DLGAP5	-2.97825	0.00139529	0.0185799
ENSG00000082805	ERC1	-0.683675	0.389943	0.707556
ENSG00000152642	GPD1L	-2.97401	0.000133624	0.00273559
ENSG00000082996	RNF13	-0.114159	0.848734	0.946231
ENSG00000083093	PALB2	-0.265264	0.794898	0.924518
ENSG00000175093	SPSB4	-2.97376	0.0696538	0.29067
ENSG00000083099	LYRM2	-0.0947548	0.780497	0.918382
ENSG00000083123	BCKDHB	0.486655	0.502086	0.783083
ENSG00000083168	KAT6A	-0.417175	0.223828	0.545132
ENSG00000083223	ZCCHC6	0.37314	0.356219	0.679478
ENSG00000170085	SIMC1	-2.97335	0.00840141	0.0719058
ENSG00000274253	AC138649.1	-2.97171	0.0130984	0.0981376
ENSG00000156787	TBC1D31	-2.9688	0.00111376	0.0155014
ENSG00000083454	P2RX5	0.988185	0.578182	0.828433
ENSG00000106333	PCOLCE	-2.96737	0.00807305	0.0702678
ENSG00000083520	DIS3	-0.308752	0.306431	0.638467
ENSG00000083535	PIBF1	-0.567014	0.397611	0.71298
ENSG00000154917	RAB6B	-2.96434	0.073973	0.300548
ENSG00000083635	NUFIP1	-0.822807	0.464674	0.757845
ENSG00000105409	ATP1A3	-2.96393	0.0172044	0.118737
ENSG00000131747	TOP2A	-2.96271	2.15398e-25	3.97974e-22
ENSG00000083750	RRAGB	-1.15863	0.30698	0.63888
ENSG00000083799	CYLD	0.0473066	0.881268	0.957795
ENSG00000083807	SLC27A5	0.0614426	0.869518	0.953792
ENSG00000235903	CPB2-AS1	-2.9619	0.108868	0.374924
ENSG00000178999	AURKB	-2.9594	1.12225e-09	1.14566e-07
ENSG00000240401	AC012358.3	-2.95866	0.0946093	0.345118
ENSG00000083828	ZNF586	0.461523	0.309058	0.640926
ENSG00000083838	ZNF446	0.15542	0.760789	0.910913
ENSG00000083844	ZNF264	-0.283177	0.537727	0.805059
ENSG00000273002	AL355388.2	-2.95654	0.0626757	0.271779
ENSG00000083896	YTHDC1	0.127911	0.576465	0.82729
ENSG00000083937	CHMP2B	-0.626149	0.326122	0.655543
ENSG00000123473	STIL	-2.95556	0.00829821	0.0711873
ENSG00000247473	CARS-AS1	-2.95508	0.0301071	0.171621
ENSG00000084073	ZMPSTE24	0.122486	0.873765	0.955097
ENSG00000197969	VPS13A	-2.952	0.00825905	0.0710639
ENSG00000241127	YAE1D1	-2.95154	0.0182578	0.12385
ENSG00000260466	AC126696.2	-2.94767	0.0777449	0.309577
ENSG00000104147	OIP5	-2.94521	0.00523038	0.0507425
ENSG00000084112	SSH1	0.359316	0.411405	0.72059
ENSG00000279010	AL031587.6	-2.94067	0.0408276	0.209321
ENSG00000075702	WDR62	-2.94035	1.02279e-06	4.40755e-05
ENSG00000084444	FAM234B	-0.452908	0.583185	0.830561
ENSG00000267122	AC004490.1	-2.94007	0.0985089	0.352937
ENSG00000160161	CILP2	-2.93918	0.0245338	0.150846
ENSG00000130600	H19	-2.93826	0.00861738	0.0733718
ENSG00000084676	NCOA1	0.116358	0.748753	0.90545
ENSG00000084693	AGBL5	0.186576	0.3552	0.678383
ENSG00000115602	IL1RL1	-2.93751	0.0195716	0.129493
ENSG00000198554	WDHD1	-2.93611	0.00651106	0.0598138
ENSG00000084733	RAB10	-0.250281	0.228486	0.550938
ENSG00000146918	NCAPG2	-2.92707	0.0746472	0.302345
ENSG00000084764	MAPRE3	-0.506281	0.690676	0.88038
ENSG00000184113	CLDN5	-2.92173	0.0905025	0.336455
ENSG00000085063	CD59	0.235176	0.506	0.786505
ENSG00000085117	CD82	0.0252455	0.900044	0.964767
ENSG00000085185	BCORL1	-0.0267722	0.943789	0.980265
ENSG00000085224	ATRX	-0.0199652	0.949822	0.981839
ENSG00000085231	AK6	-0.0557321	0.915177	0.97039
ENSG00000235961	PNMA6A	-2.92058	0.113049	0.383603
ENSG00000085274	MYNN	0.389118	0.384945	0.70306
ENSG00000085365	SCAMP1	-0.396881	0.492413	0.777669
ENSG00000085377	PREP	-0.319385	0.496303	0.779264
ENSG00000057935	MTA3	-2.91612	0.0121211	0.0929396
ENSG00000118596	SLC16A7	-2.91193	0.028095	0.164529
ENSG00000085433	WDR47	-1.18241	0.200525	0.516485
ENSG00000085449	WDFY1	-0.571515	0.328053	0.657327
ENSG00000085465	OVGP1	0.8068	0.613099	0.846462
ENSG00000085491	SLC25A24	-0.609959	0.473182	0.763886
ENSG00000085511	MAP3K4	0.0186285	0.957149	0.984594
ENSG00000226167	AP4B1-AS1	-2.91042	0.0714416	0.295031
ENSG00000085563	ABCB1	-1.73582	0.459585	0.753908
ENSG00000085644	ZNF213	-0.266375	0.746181	0.904041
ENSG00000085662	AKR1B1	-0.362337	0.264425	0.590582
ENSG00000085719	CPNE3	0.414657	0.818902	0.933605
ENSG00000120832	MTERF2	-2.909	0.0967368	0.3496
ENSG00000115257	PCSK4	-2.90717	0.0120612	0.0926596
ENSG00000085741	WNT11	-0.529216	0.611498	0.845514
ENSG00000085760	MTIF2	-0.0114632	0.971458	0.989941
ENSG00000226711	FAM66C	-2.90597	0.118305	0.392872
ENSG00000085832	EPS15	0.167206	0.423929	0.73023
ENSG00000170370	EMX2	-2.89979	6.97674e-05	0.00158896
ENSG00000238121	LINC00426	-2.89782	0.07078	0.293189
ENSG00000085872	CHERP	-0.150583	0.349906	0.673696
ENSG00000085978	ATG16L1	-1.01789	0.224883	0.546351
ENSG00000085982	USP40	-0.210585	0.537796	0.805059
ENSG00000085998	POMGNT1	-0.317802	0.347052	0.671678
ENSG00000079101	CLUL1	-2.89712	0.153749	0.45216
ENSG00000086015	MAST2	0.0187965	0.927576	0.974331
ENSG00000086061	DNAJA1	-0.0567256	0.818186	0.933494
ENSG00000086062	B4GALT1	0.15743	0.616707	0.848652
ENSG00000086065	CHMP5	-0.137154	0.607607	0.843949
ENSG00000115170	ACVR1	-2.89656	0.04381	0.218528
ENSG00000086189	DIMT1	-0.0757965	0.80916	0.929944
ENSG00000225798	AC025918.1	-2.89144	0.0658193	0.280533
ENSG00000154719	MRPL39	-2.88646	0.00628069	0.0583867
ENSG00000086288	NME8	-1.04444	0.459512	0.753908
ENSG00000086289	EPDR1	-0.25162	0.494721	0.778833
ENSG00000086300	SNX10	1.09398	0.196202	0.511564
ENSG00000086475	SEPHS1	-0.209586	0.456598	0.751996
ENSG00000086504	MRPL28	0.169788	0.530219	0.801095
ENSG00000086506	HBQ1	0.636047	0.479971	0.768711
ENSG00000086544	ITPKC	0.452458	0.579426	0.828983
ENSG00000086570	FAT2	-1.57381	0.425527	0.731618
ENSG00000086589	RBM22	-0.180704	0.346663	0.671236
ENSG00000086598	TMED2	0.031507	0.865353	0.95231
ENSG00000086619	ERO1B	0.369712	0.62683	0.85244
ENSG00000086666	ZFAND6	0.236346	0.380456	0.700052
ENSG00000086712	TXLNG	-0.261295	0.492315	0.777669
ENSG00000159958	TNFRSF13C	-2.87729	0.0913156	0.338534
ENSG00000086758	HUWE1	-0.0706959	0.798775	0.92527
ENSG00000086827	ZW10	-0.329611	0.664254	0.869495
ENSG00000086848	ALG9	-0.154426	0.868139	0.952912
ENSG00000087008	ACOX3	0.0596137	0.888037	0.960632
ENSG00000254615	AC027031.2	-2.87596	0.0355682	0.192084
ENSG00000184221	OLIG1	-2.87432	0.00728288	0.0649658
ENSG00000280161	AC022413.1	-2.86714	0.0333545	0.184166
ENSG00000099834	CDHR5	-2.86636	0.106501	0.370096
ENSG00000279382	AC018665.1	-2.85889	0.152775	0.450552
ENSG00000240291	AL450384.2	-2.858	0.120528	0.396335
ENSG00000087088	BAX	0.189757	0.365694	0.686679
ENSG00000087095	NLK	-0.0879869	0.841436	0.943289
ENSG00000261490	AC005674.2	-2.85228	0.12105	0.396854
ENSG00000204519	ZNF551	-2.85037	0.0576858	0.257288
ENSG00000087157	PGS1	0.0168744	0.949154	0.981839
ENSG00000087191	PSMC5	0.0204572	0.912302	0.969077
ENSG00000087206	UIMC1	-0.257038	0.264123	0.590264
ENSG00000100628	ASB2	-2.84768	0.151659	0.448961
ENSG00000170191	NANP	-2.84373	0.0261032	0.156334
ENSG00000087263	OGFOD1	-0.423502	0.2153	0.534631
ENSG00000067533	RRP15	-2.83424	0.0196963	0.130027
ENSG00000087269	NOP14	0.110017	0.659537	0.867345
ENSG00000087274	ADD1	0.0939288	0.537788	0.805059
ENSG00000087299	L2HGDH	-0.792926	0.416096	0.723908
ENSG00000087301	TXNDC16	0.607514	0.602248	0.84103
ENSG00000087302	RTRAF	0.00913239	0.969997	0.989682
ENSG00000087303	NID2	-0.890412	0.625769	0.851976
ENSG00000087338	GMCL1	-0.514712	0.449392	0.747244
ENSG00000065621	GSTO2	-2.83123	0.159029	0.458655
ENSG00000101935	AMMECR1	-2.8297	0.0443268	0.220113
ENSG00000229043	AC091729.3	-2.82071	0.0110172	0.0871763
ENSG00000087470	DNM1L	-0.348147	0.302927	0.634845
ENSG00000087495	PHACTR3	1.46662	0.528812	0.800284
ENSG00000087502	ERGIC2	-0.339872	0.418894	0.726552
ENSG00000167964	RAB26	-2.81945	0.0796736	0.313707
ENSG00000087589	CASS4	0.707542	0.472674	0.763653
ENSG00000087842	PIR	-0.257745	0.704767	0.885986
ENSG00000087884	AAMDC	-0.520627	0.227854	0.550191
ENSG00000168077	SCARA3	-2.81481	0.0067404	0.0613862
ENSG00000087995	METTL2A	-0.102401	0.772115	0.915574
ENSG00000155380	SLC16A1	-2.80796	0.00225466	0.0270724
ENSG00000088038	CNOT3	-0.0247034	0.892183	0.962159
ENSG00000088179	PTPN4	-0.368631	0.496359	0.779264
ENSG00000088205	DDX18	-0.351363	0.328817	0.657576
ENSG00000128165	ADM2	-2.80503	0.0926928	0.341243
ENSG00000123219	CENPK	-2.80343	0.00188291	0.0235859
ENSG00000088298	EDEM2	0.0323175	0.917348	0.971159
ENSG00000120129	DUSP1	-2.8017	0.0365656	0.195423
ENSG00000259781	HMGB1P6	-2.79983	6.23932e-05	0.00144778
ENSG00000260381	AC007610.2	-2.79907	0.162975	0.464875
ENSG00000088387	DOCK9	-1.1831	0.600648	0.840241
ENSG00000088448	ANKRD10	-0.254237	0.398843	0.713544
ENSG00000088451	TGDS	-0.818124	0.200307	0.51645
ENSG00000088538	DOCK3	0.246237	0.899379	0.964767
ENSG00000172469	MANEA	-2.79451	0.0275071	0.162633
ENSG00000088682	COQ9	-0.185431	0.607295	0.843949
ENSG00000225578	NCBP2-AS1	-2.79334	0.0779602	0.310024
ENSG00000088766	CRLS1	0.0965495	0.717141	0.891535
ENSG00000088812	ATRN	-0.862931	0.330151	0.658388
ENSG00000151470	C4orf33	-2.78807	0.0299941	0.17106
ENSG00000088827	SIGLEC1	1.99481	0.276089	0.604485
ENSG00000088832	FKBP1A	-0.170694	0.205138	0.523326
ENSG00000088833	NSFL1C	0.167633	0.407134	0.718634
ENSG00000079691	CARMIL1	-2.78782	0.133903	0.418066
ENSG00000088854	C20orf194	0.418699	0.509224	0.788137
ENSG00000088876	ZNF343	0.162792	0.763226	0.911984
ENSG00000088881	EBF4	0.704373	0.196271	0.511564
ENSG00000271936	AC012073.1	-2.78721	0.0124482	0.0946971
ENSG00000088888	MAVS	0.0700911	0.675749	0.875797
ENSG00000088899	LZTS3	-0.535098	0.689352	0.879849
ENSG00000088930	XRN2	0.166707	0.469267	0.760876
ENSG00000273747	AC022558.3	-2.78441	0.0489597	0.232898
ENSG00000253981	ALG1L13P	-2.78362	0.0546033	0.248509
ENSG00000088992	TESC	-0.0920344	0.708608	0.887535
ENSG00000164251	F2RL1	-2.77972	0.0482208	0.231558
ENSG00000214184	GCC2-AS1	-2.77966	0.116412	0.389119
ENSG00000089022	MAPKAPK5	-0.52922	0.21828	0.537903
ENSG00000089041	P2RX7	1.0354	0.263326	0.589782
ENSG00000089048	ESF1	-0.76947	0.383963	0.702183
ENSG00000089050	RBBP9	-0.303434	0.68116	0.877864
ENSG00000254681	PKD1P5	-2.77945	0.0665558	0.282853
ENSG00000089057	SLC23A2	-0.832128	0.234872	0.558142
ENSG00000259343	TMC3-AS1	-2.77483	0.0466692	0.227213
ENSG00000089063	TMEM230	0.115518	0.662943	0.868953
ENSG00000089091	DZANK1	-1.38125	0.334626	0.662013
ENSG00000272693	AC073107.1	-2.77078	0.0211097	0.136195
ENSG00000105011	ASF1B	-2.77074	1.76338e-12	3.67106e-10
ENSG00000089127	OAS1	0.265829	0.7801	0.918382
ENSG00000225792	AC004540.2	-2.77065	0.0386244	0.202306
ENSG00000276278	AC048382.6	-2.76299	0.0379684	0.200161
ENSG00000162062	TEDC2	-2.76266	0.0413575	0.210941
ENSG00000259327	AC023906.3	-2.75849	0.0202291	0.13258
ENSG00000089199	CHGB	0.785897	0.515965	0.792597
ENSG00000089220	PEBP1	-0.108197	0.509071	0.788137
ENSG00000089234	BRAP	0.218367	0.502632	0.783609
ENSG00000001631	KRIT1	-2.75586	0.00719312	0.0644372
ENSG00000241764	AC002467.1	-2.75584	0.0555051	0.251355
ENSG00000204177	BMS1P1	-2.74717	0.0693049	0.289705
ENSG00000230701	FBXW4P1	-2.74563	0.0846237	0.324131
ENSG00000138829	FBN2	-2.74171	0.169422	0.475637
ENSG00000260001	TGFBR3L	-2.73923	0.00925878	0.0773004
ENSG00000129810	SGO1	-2.73788	0.000948621	0.0136662
ENSG00000089558	KCNH4	0.165366	0.927035	0.974331
ENSG00000057704	TMCC3	-2.73758	0.113868	0.384528
ENSG00000089639	GMIP	-0.236077	0.537486	0.805059
ENSG00000089682	RBM41	-0.499984	0.61011	0.844762
ENSG00000279822	AC016397.2	-2.73676	0.0699424	0.291156
ENSG00000164100	NDST3	-2.73601	0.007496	0.0663861
ENSG00000271941	AC104184.1	-2.73558	0.086219	0.327694
ENSG00000166321	NUDT13	-2.73207	0.0126159	0.0956283
ENSG00000255508	AP002990.1	-2.72854	0.106564	0.370096
ENSG00000168671	UGT3A2	-2.72423	0.0727792	0.297662
ENSG00000089818	NECAP1	0.12437	0.90127	0.965246
ENSG00000089820	ARHGAP4	-0.0654886	0.771729	0.915361
ENSG00000084710	EFR3B	-2.72006	0.154358	0.452962
ENSG00000089876	DHX32	-0.378122	0.388742	0.705725
ENSG00000089902	RCOR1	-0.1954	0.630336	0.853837
ENSG00000089916	GPATCH2L	0.205436	0.488559	0.775493
ENSG00000090006	LTBP4	0.180479	0.705099	0.885986
ENSG00000162729	IGSF8	-2.71968	0.00858293	0.073205
ENSG00000090020	SLC9A1	-0.446932	0.267375	0.594475
ENSG00000090054	SPTLC1	-1.44429	0.206701	0.524686
ENSG00000090060	PAPOLA	0.00929971	0.955888	0.984333
ENSG00000090061	CCNK	0.0707815	0.785012	0.919933
ENSG00000090097	PCBP4	-1.09746	0.29959	0.631343
ENSG00000090104	RGS1	-1.32527	0.492552	0.777669
ENSG00000262223	AC110285.1	-2.71836	0.159625	0.459835
ENSG00000244040	IL12A-AS1	-2.71804	0.0109633	0.0869825
ENSG00000090266	NDUFB2	0.0314421	0.875672	0.955508
ENSG00000090273	NUDC	-0.181244	0.352225	0.675642
ENSG00000090316	MAEA	0.00373551	0.986037	0.995613
ENSG00000259498	TPM1-AS	-2.71487	0.0900666	0.335503
ENSG00000229847	EMX2OS	-2.70564	2.88328e-05	0.000767888
ENSG00000090376	IRAK3	-0.214146	0.482078	0.769842
ENSG00000184117	NIPSNAP1	-2.70555	0.0113895	0.089026
ENSG00000258749	AL110504.1	-2.7038	0.0460339	0.225009
ENSG00000090447	TFAP4	-0.42504	0.272077	0.598982
ENSG00000090470	PDCD7	-0.233286	0.470195	0.761693
ENSG00000134569	LRP4	-2.69969	0.0131129	0.0981376
ENSG00000164989	CCDC171	-2.69905	0.0455434	0.223634
ENSG00000197822	OCLN	-2.69823	0.0722378	0.296926
ENSG00000155034	FBXL18	-2.69413	0.0225215	0.142688
ENSG00000090612	ZNF268	-0.27451	0.416348	0.723976
ENSG00000090615	GOLGA3	0.0305324	0.898451	0.964626
ENSG00000226645	AP006216.1	-2.69179	0.117182	0.391074
ENSG00000170092	SPDYE5	-2.68863	0.130229	0.411807
ENSG00000090674	MCOLN1	0.166586	0.78102	0.918382
ENSG00000090686	USP48	-0.0865264	0.762298	0.911637
ENSG00000090776	EFNB1	-0.85314	0.359742	0.681749
ENSG00000090857	PDPR	-0.18833	0.607462	0.843949
ENSG00000090861	AARS	-0.500915	0.21697	0.536643
ENSG00000090863	GLG1	-0.103945	0.650892	0.86363
ENSG00000147119	CHST7	-2.67328	0.0541538	0.24751
ENSG00000090905	TNRC6A	-0.444178	0.246071	0.570736
ENSG00000090924	PLEKHG2	0.294605	0.251154	0.575525
ENSG00000090932	DLL3	1.5938	0.215675	0.535151
ENSG00000090971	NAT14	0.437938	0.220892	0.541371
ENSG00000090975	PITPNM2	0.152435	0.689218	0.879849
ENSG00000090989	EXOC1	0.032627	0.92598	0.973958
ENSG00000091009	RBM27	-0.473959	0.210386	0.529222
ENSG00000091039	OSBPL8	0.519427	0.290164	0.620683
ENSG00000091073	DTX2	0.405726	0.23774	0.560459
ENSG00000091106	NLRC4	-0.87169	0.495659	0.779102
ENSG00000171757	LRRC34	-2.67319	0.0769672	0.307473
ENSG00000091140	DLD	-0.242833	0.387337	0.704792
ENSG00000091157	WDR7	0.559254	0.315275	0.645531
ENSG00000091164	TXNL1	0.055166	0.885436	0.959054
ENSG00000157703	SVOPL	-2.67183	0.0583258	0.258971
ENSG00000213390	ARHGAP19	-2.66807	0.000776534	0.0115812
ENSG00000091409	ITGA6	0.32698	0.466989	0.759108
ENSG00000091436	MAP3K20	-0.467794	0.200208	0.516363
ENSG00000115085	ZAP70	-2.66595	0.0490001	0.232898
ENSG00000091490	SEL1L3	-0.327645	0.219885	0.540067
ENSG00000091527	CDV3	-0.0350852	0.817794	0.933422
ENSG00000091542	ALKBH5	0.0930898	0.618447	0.849745
ENSG00000232160	RAP2C-AS1	-2.6633	0.0803538	0.314955
ENSG00000215158	AC138409.2	-2.6613	0.0167134	0.116548
ENSG00000277806	AC006213.4	-2.65484	0.0930878	0.342186
ENSG00000091732	ZC3HC1	0.276028	0.435562	0.738901
ENSG00000091879	ANGPT2	-1.61197	0.332399	0.660287
ENSG00000081041	CXCL2	-2.6512	0.0771745	0.308052
ENSG00000092010	PSME1	0.129672	0.602822	0.841423
ENSG00000092020	PPP2R3C	0.336464	0.237929	0.560755
ENSG00000092036	HAUS4	-0.420069	0.373526	0.694052
ENSG00000092051	JPH4	0.0912425	0.93511	0.976895
ENSG00000092067	CEBPE	-0.833667	0.380185	0.699651
ENSG00000092094	OSGEP	-0.359985	0.249361	0.573746
ENSG00000092096	SLC22A17	-0.368149	0.792792	0.923861
ENSG00000185158	LRRC37B	-2.65076	0.00933909	0.0778135
ENSG00000092108	SCFD1	0.284291	0.546895	0.810879
ENSG00000092140	G2E3	-0.24853	0.752575	0.907229
ENSG00000117593	DARS2	-2.64979	0.00136121	0.0182082
ENSG00000196455	PIK3R4	-2.64918	0.0120207	0.0924925
ENSG00000182224	CYB5D1	-2.64837	0.166874	0.471148
ENSG00000092203	TOX4	0.218423	0.331998	0.66011
ENSG00000092208	GEMIN2	-0.446337	0.479582	0.76834
ENSG00000092295	TGM1	-0.256643	0.734958	0.899215
ENSG00000113721	PDGFRB	-2.64567	0.0921261	0.340551
ENSG00000092421	SEMA6A	-0.192039	0.828354	0.937397
ENSG00000200534	SNORA33	-2.64527	0.113312	0.383878
ENSG00000279207	AC015813.6	-2.64225	0.135262	0.419993
ENSG00000161929	SCIMP	-2.63909	0.175081	0.483805
ENSG00000092531	SNAP23	0.394126	0.278375	0.607062
ENSG00000037749	MFAP3	-2.63663	0.0425545	0.214382
ENSG00000092758	COL9A3	0.28737	0.585784	0.831616
ENSG00000092820	EZR	-0.0201999	0.949807	0.981839
ENSG00000197046	SIGLEC15	-2.63543	0.0832183	0.321364
ENSG00000092847	AGO1	0.0513725	0.855063	0.948352
ENSG00000148935	GAS2	-2.63233	0.126094	0.405349
ENSG00000092871	RFFL	0.126816	0.681613	0.877938
ENSG00000092929	UNC13D	0.171645	0.402887	0.716357
ENSG00000102445	RUBCNL	-2.63156	0.140613	0.429079
ENSG00000092964	DPYSL2	-0.146436	0.818716	0.933537
ENSG00000092978	GPATCH2	-0.499643	0.39376	0.710156
ENSG00000241163	LINC00877	-2.63146	0.010979	0.0870602
ENSG00000121211	MND1	-2.63145	0.0380098	0.200222
ENSG00000093010	COMT	-0.188792	0.328823	0.657576
ENSG00000093072	ADA2	-0.478004	0.316107	0.646875
ENSG00000093144	ECHDC1	0.270729	0.249533	0.573746
ENSG00000093167	LRRFIP2	0.132451	0.857825	0.949492
ENSG00000271848	AC073389.2	-2.63041	0.1581	0.457698
ENSG00000094631	HDAC6	0.139058	0.651219	0.863831
ENSG00000095637	SORBS1	-2.62943	0.0579453	0.258134
ENSG00000094841	UPRT	-0.161953	0.856457	0.948874
ENSG00000094880	CDC23	-0.914154	0.561158	0.818324
ENSG00000094914	AAAS	-0.277628	0.25075	0.575016
ENSG00000234377	RNF219-AS1	-2.62873	0.0946874	0.345318
ENSG00000178202	KDELC2	-2.62763	6.91776e-06	0.000234522
ENSG00000266392	MIR4740	-2.62658	0.0452997	0.223043
ENSG00000095015	MAP3K1	-0.162858	0.537348	0.805059
ENSG00000095059	DHPS	0.0261429	0.925545	0.973958
ENSG00000237940	LINC01238	-2.61977	0.0991807	0.354446
ENSG00000160298	C21orf58	-2.6132	1.01791e-11	1.61781e-09
ENSG00000095209	TMEM38B	0.0681152	0.924736	0.973958
ENSG00000095261	PSMD5	-1.10666	0.446225	0.745507
ENSG00000095303	PTGS1	0.146532	0.711865	0.888844
ENSG00000068650	ATP11A	-2.61301	0.00100263	0.0143187
ENSG00000095321	CRAT	-0.175216	0.5569	0.816702
ENSG00000095370	SH2D3C	0.32949	0.277099	0.605709
ENSG00000095380	NANS	-0.0413606	0.894116	0.96326
ENSG00000137274	BPHL	-2.61286	0.028847	0.166707
ENSG00000120539	MASTL	-2.60884	0.00762806	0.0673136
ENSG00000095485	CWF19L1	-0.119255	0.728715	0.896847
ENSG00000095539	SEMA4G	-0.205145	0.792493	0.923861
ENSG00000095564	BTAF1	-0.339568	0.449665	0.747385
ENSG00000095574	IKZF5	-0.417764	0.319329	0.650014
ENSG00000234028	AC062029.1	-2.60253	0.124338	0.401803
ENSG00000095787	WAC	-0.170448	0.40979	0.719219
ENSG00000095794	CREM	-0.489251	0.550494	0.813543
ENSG00000095906	NUBP2	0.209989	0.355673	0.678611
ENSG00000095917	TPSD1	-0.354327	0.713525	0.890385
ENSG00000260442	ATP2A1-AS1	-2.60189	0.0725189	0.297503
ENSG00000151150	ANK3	-2.60126	0.145425	0.437251
ENSG00000095970	TREM2	1.43296	0.303788	0.635929
ENSG00000272677	AC124016.1	-2.59974	0.116378	0.389107
ENSG00000096063	SRPK1	0.17299	0.594737	0.836821
ENSG00000096070	BRPF3	-0.925453	0.323417	0.653869
ENSG00000137825	ITPKA	-2.59753	0.00396107	0.0412024
ENSG00000096092	TMEM14A	-1.00693	0.246405	0.570926
ENSG00000096093	EFHC1	-0.15827	0.85265	0.947581
ENSG00000096384	HSP90AB1	-0.150758	0.39378	0.710156
ENSG00000096401	CDC5L	-0.132327	0.798278	0.925136
ENSG00000096433	ITPR3	-1.08622	0.203819	0.521039
ENSG00000096654	ZNF184	-0.827435	0.438731	0.740869
ENSG00000096717	SIRT1	-0.773515	0.286708	0.616736
ENSG00000133111	RFXAP	-2.5972	0.0211066	0.136195
ENSG00000096872	IFT74	-0.2097	0.724991	0.895545
ENSG00000096968	JAK2	-1.46534	0.190806	0.504525
ENSG00000096996	IL12RB1	0.413619	0.588606	0.833031
ENSG00000097007	ABL1	-0.458086	0.23541	0.558459
ENSG00000101104	PABPC1L	-2.59539	0.0190185	0.127028
ENSG00000271888	AL136162.1	-2.59503	0.0876853	0.330687
ENSG00000170006	TMEM154	-2.59333	0.0813647	0.316939
ENSG00000232093	DCST1-AS1	-2.59291	0.106116	0.369127
ENSG00000099203	TMED1	0.138707	0.499165	0.781088
ENSG00000099204	ABLIM1	-0.940602	0.264968	0.591257
ENSG00000099219	ERMP1	-0.285748	0.387434	0.704792
ENSG00000099246	RAB18	0.130994	0.718135	0.891781
ENSG00000092098	RNF31	-2.59197	0.081911	0.31811
ENSG00000099251	HSD17B7P2	0.158014	0.877035	0.956007
ENSG00000071539	TRIP13	-2.58458	0.0132276	0.0987598
ENSG00000182481	KPNA2	-2.58436	4.00589e-12	7.31e-10
ENSG00000099308	MAST3	0.0181466	0.969993	0.989682
ENSG00000102230	PCYT1B	-2.57657	0.0391458	0.203809
ENSG00000099330	OCEL1	0.29945	0.438215	0.740701
ENSG00000255468	AP001107.9	-2.57394	0.0387701	0.202921
ENSG00000099337	KCNK6	0.399971	0.40274	0.716334
ENSG00000099338	CATSPERG	0.872157	0.516231	0.792597
ENSG00000099341	PSMD8	-0.0341606	0.864528	0.95231
ENSG00000099364	FBXL19	-0.0807258	0.747311	0.904668
ENSG00000099365	STX1B	0.493404	0.749901	0.905874
ENSG00000099377	HSD3B7	0.588314	0.386768	0.704389
ENSG00000144550	CPNE9	-2.57253	0.104597	0.365669
ENSG00000159082	SYNJ1	-2.57106	0.0582442	0.258926
ENSG00000099622	CIRBP	0.181639	0.326716	0.656229
ENSG00000248980	AC019163.1	-2.57084	0.0223832	0.142008
ENSG00000147124	ZNF41	-2.56937	0.0296954	0.170259
ENSG00000228778	AL513542.1	-2.56611	0.0447795	0.221515
ENSG00000122952	ZWINT	-2.56423	0.0133383	0.0993321
ENSG00000260193	AL138781.1	-2.55817	0.0884704	0.332275
ENSG00000099797	TECR	0.0832633	0.703621	0.885872
ENSG00000099800	TIMM13	0.235591	0.319246	0.650014
ENSG00000129484	PARP2	-2.55681	0.00355641	0.0380384
ENSG00000099810	MTAP	-0.0242304	0.961	0.985614
ENSG00000099814	CEP170B	0.285696	0.749665	0.905739
ENSG00000277283	AC004812.2	-2.55003	0.0636426	0.2745
ENSG00000272146	ARF4-AS1	-2.54921	0.159607	0.459835
ENSG00000099822	HCN2	0.14775	0.878255	0.956359
ENSG00000184445	KNTC1	-2.54889	0.000602454	0.00941319
ENSG00000189350	TOGARAM2	-2.54757	0.0690828	0.289349
ENSG00000099849	RASSF7	0.241593	0.324997	0.654823
ENSG00000138376	BARD1	-2.54721	0.026237	0.156881
ENSG00000117399	CDC20	-2.54501	8.30545e-20	6.82016e-17
ENSG00000099875	MKNK2	0.175364	0.407114	0.718634
ENSG00000105672	ETV2	-2.54393	0.119115	0.394319
ENSG00000099899	TRMT2A	0.0578973	0.757333	0.909229
ENSG00000247679	AC139795.2	-2.53867	0.128919	0.409698
ENSG00000099904	ZDHHC8	0.0728755	0.796358	0.924518
ENSG00000099910	KLHL22	0.203263	0.636697	0.856931
ENSG00000099917	MED15	0.152833	0.431119	0.735529
ENSG00000240591	AL096701.3	-2.52922	0.134973	0.419611
ENSG00000099942	CRKL	-0.136854	0.612669	0.846341
ENSG00000101003	GINS1	-2.52615	0.000737219	0.0110853
ENSG00000099953	MMP11	0.665088	0.631249	0.854049
ENSG00000099956	SMARCB1	-0.0870996	0.595883	0.837095
ENSG00000099958	DERL3	-0.328491	0.69279	0.881041
ENSG00000099968	BCL2L13	0.0901578	0.781009	0.918382
ENSG00000099974	DDTL	0.221814	0.321644	0.652603
ENSG00000099977	DDT	0.157847	0.513655	0.791198
ENSG00000249565	SERBP1P5	-2.52161	0.0462904	0.22574
ENSG00000099991	CABIN1	0.105959	0.522125	0.795583
ENSG00000099992	TBC1D10A	0.21696	0.78606	0.920151
ENSG00000099995	SF3A1	-0.161064	0.589401	0.833726
ENSG00000099998	GGT5	0.0325033	0.927146	0.974331
ENSG00000099999	RNF215	-0.037029	0.929267	0.974619
ENSG00000100014	SPECC1L	-0.151877	0.630388	0.853837
ENSG00000100448	CTSG	-2.52018	1.14335e-14	4.02378e-12
ENSG00000100027	YPEL1	-0.276974	0.442068	0.742501
ENSG00000131503	ANKHD1	-2.5094	0.176406	0.485559
ENSG00000100029	PES1	0.145369	0.460807	0.754173
ENSG00000215817	ZC3H11B	-2.50408	0.0676827	0.286079
ENSG00000267383	AC011447.3	-2.50379	0.0721116	0.296573
ENSG00000100033	PRODH	0.0495346	0.903249	0.966159
ENSG00000100034	PPM1F	0.151056	0.541147	0.807704
ENSG00000100036	SLC35E4	0.0152401	0.989058	0.996016
ENSG00000100038	TOP3B	-0.378438	0.295234	0.627531
ENSG00000139133	ALG10	-2.50368	0.0431701	0.216224
ENSG00000100056	ESS2	0.226141	0.553931	0.815303
ENSG00000100058	CRYBB2P1	-0.280036	0.546865	0.810879
ENSG00000100060	MFNG	-0.158866	0.55145	0.81378
ENSG00000100065	CARD10	-0.191879	0.894	0.96326
ENSG00000100068	LRP5L	-0.0121433	0.976755	0.992078
ENSG00000100075	SLC25A1	-0.200081	0.339866	0.665394
ENSG00000100077	GRK3	0.209207	0.708159	0.887532
ENSG00000100083	GGA1	-0.125813	0.695356	0.88197
ENSG00000100084	HIRA	0.00553998	0.990373	0.996016
ENSG00000100092	SH3BP1	0.127602	0.458309	0.753114
ENSG00000135476	ESPL1	-2.49988	9.21228e-08	5.31901e-06
ENSG00000205622	AP001043.1	-2.49938	0.184117	0.495747
ENSG00000151376	ME3	-2.49906	0.164194	0.466769
ENSG00000100104	SRRD	0.111922	0.67644	0.87602
ENSG00000100105	PATZ1	-0.259335	0.328855	0.657576
ENSG00000100106	TRIOBP	0.221964	0.36685	0.687908
ENSG00000100109	TFIP11	0.235356	0.413189	0.721765
ENSG00000100116	GCAT	-0.0276661	0.948307	0.981839
ENSG00000100122	CRYBB1	0.588755	0.392864	0.709656
ENSG00000013503	POLR3B	-2.49886	0.038974	0.203585
ENSG00000229666	MAST4-AS1	-2.49709	0.13145	0.413926
ENSG00000100138	SNU13	0.208826	0.393537	0.710154
ENSG00000100139	MICALL1	-0.146905	0.469364	0.760876
ENSG00000100147	CCDC134	-0.987458	0.562818	0.81993
ENSG00000100150	DEPDC5	-0.14107	0.873788	0.955097
ENSG00000246273	SBF2-AS1	-2.49369	0.0884908	0.332275
ENSG00000100154	TTC28	0.310831	0.592448	0.835032
ENSG00000240527	AL365273.1	-2.49055	0.0705394	0.292795
ENSG00000100181	TPTEP1	-0.736934	0.390162	0.707563
ENSG00000100196	KDELR3	-0.333093	0.621874	0.850931
ENSG00000158163	DZIP1L	-2.48636	0.178081	0.487446
ENSG00000100201	DDX17	0.0302358	0.865981	0.95231
ENSG00000100207	TCF20	-0.277377	0.439691	0.741456
ENSG00000239697	TNFSF12	-2.48037	0.168695	0.474496
ENSG00000100211	CBY1	0.182327	0.616908	0.848702
ENSG00000283064	AL353759.1	-2.46383	0.0593481	0.262093
ENSG00000100219	XBP1	-0.126832	0.401062	0.714832
ENSG00000100220	RTCB	-0.0952525	0.690372	0.880347
ENSG00000175322	ZNF519	-2.46083	0.0577446	0.257473
ENSG00000100225	FBXO7	-0.0831034	0.715164	0.890904
ENSG00000100226	GTPBP1	-0.105631	0.633449	0.854913
ENSG00000100227	POLDIP3	-0.169809	0.453544	0.75049
ENSG00000100234	TIMP3	0.0995761	0.872285	0.954888
ENSG00000100239	PPP6R2	0.106463	0.595588	0.837095
ENSG00000100241	SBF1	-0.187976	0.349206	0.673312
ENSG00000102743	SLC25A15	-2.45321	0.00466977	0.0465622
ENSG00000159307	SCUBE1	-2.45303	0.0464309	0.226127
ENSG00000100246	DNAL4	0.47816	0.527371	0.799294
ENSG00000100258	LMF2	-0.17393	0.362612	0.684458
ENSG00000100263	RHBDD3	-0.0575321	0.834953	0.940587
ENSG00000100266	PACSIN2	-0.0487445	0.798	0.925136
ENSG00000100271	TTLL1	-0.480863	0.544062	0.809549
ENSG00000100276	RASL10A	0.739647	0.502736	0.783689
ENSG00000173715	C11orf80	-2.45259	0.0525585	0.243532
ENSG00000226328	NUP50-AS1	-2.4516	0.00545193	0.0524383
ENSG00000197905	TEAD4	-2.44857	0.0786783	0.311698
ENSG00000100285	NEFH	0.427671	0.731803	0.898465
ENSG00000100290	BIK	-0.685724	0.380963	0.700637
ENSG00000100292	HMOX1	0.378454	0.467892	0.759628
ENSG00000100294	MCAT	0.369968	0.246886	0.57138
ENSG00000100296	THOC5	0.081964	0.763154	0.911972
ENSG00000204172	AGAP9	-2.4464	0.0237048	0.147343
ENSG00000258757	AL133453.1	-2.44521	0.128685	0.409139
ENSG00000100299	ARSA	-0.303454	0.70139	0.885484
ENSG00000113790	EHHADH	-2.44436	0.159085	0.458728
ENSG00000159899	NPR2	-2.44282	0.158007	0.457698
ENSG00000100307	CBX7	0.92727	0.326574	0.656122
ENSG00000132016	C19orf57	-2.44234	0.0111971	0.0880809
ENSG00000088325	TPX2	-2.43959	2.16578e-27	5.33541e-24
ENSG00000260418	AL023284.4	-2.43652	0.158818	0.458404
ENSG00000100320	RBFOX2	-0.751401	0.624139	0.851482
ENSG00000245904	AC025164.2	-2.43448	0.0730036	0.297996
ENSG00000100324	TAB1	0.208167	0.314698	0.645511
ENSG00000100325	ASCC2	0.136248	0.470726	0.762038
ENSG00000100330	MTMR3	-0.0240473	0.947383	0.981655
ENSG00000100335	MIEF1	0.192581	0.422474	0.728826
ENSG00000105948	TTC26	-2.43389	0.157074	0.456043
ENSG00000259933	AC009065.2	-2.43219	0.0643695	0.276551
ENSG00000100345	MYH9	-0.0998173	0.633144	0.854785
ENSG00000066651	TRMT11	-2.42703	0.107392	0.371709
ENSG00000216895	AC009403.1	-2.42456	0.0516442	0.241034
ENSG00000244055	AC007566.1	-2.42358	0.105665	0.368185
ENSG00000114654	EFCC1	-2.42132	0.0299652	0.17101
ENSG00000100354	TNRC6B	0.0187667	0.965912	0.987764
ENSG00000100359	SGSM3	0.304885	0.829591	0.937841
ENSG00000134690	CDCA8	-2.42124	2.5897e-06	0.000101266
ENSG00000100364	KIAA0930	0.221932	0.279688	0.608635
ENSG00000232149	FERP1	-2.41686	0.0707618	0.293189
ENSG00000100368	CSF2RB	0.0280187	0.975533	0.991839
ENSG00000100372	SLC25A17	-0.488271	0.353829	0.677399
ENSG00000100376	FAM118A	-0.242782	0.533652	0.803041
ENSG00000100379	KCTD17	-0.240173	0.531666	0.801741
ENSG00000165646	SLC18A2	-2.41684	0.0282985	0.165067
ENSG00000100385	IL2RB	-0.0636364	0.969419	0.989434
ENSG00000100387	RBX1	-0.339936	0.289122	0.619488
ENSG00000113356	POLR3G	-2.41291	0.120752	0.396719
ENSG00000100395	L3MBTL2	-0.361943	0.194696	0.509344
ENSG00000100399	CHADL	-0.0339376	0.970647	0.989867
ENSG00000260685	AC027104.1	-2.41176	0.141478	0.430434
ENSG00000227855	DPY19L2P3	-2.41151	0.128361	0.408798
ENSG00000100410	PHF5A	-0.210709	0.661829	0.86828
ENSG00000100412	ACO2	-0.00589335	0.976029	0.991865
ENSG00000100413	POLR3H	0.152451	0.450642	0.748123
ENSG00000100416	TRMU	-0.0206058	0.916042	0.970749
ENSG00000100417	PMM1	-0.112125	0.863402	0.951958
ENSG00000100418	DESI1	-0.167526	0.615883	0.848393
ENSG00000276043	UHRF1	-2.40712	4.55978e-12	8.02359e-10
ENSG00000169621	APLF	-2.40702	0.094099	0.343905
ENSG00000258082	AL391832.3	-2.40607	0.149476	0.444908
ENSG00000146670	CDCA5	-2.40188	3.07446e-09	2.68897e-07
ENSG00000205930	C21orf62-AS1	-2.40162	0.185017	0.497226
ENSG00000100441	KHNYN	0.00939973	0.958389	0.985169
ENSG00000278811	LINC00624	-2.39885	0.16961	0.475983
ENSG00000100445	SDR39U1	-0.246844	0.26888	0.596118
ENSG00000169902	TPST1	-2.39874	0.183589	0.494917
ENSG00000100450	GZMH	-0.0559455	0.975109	0.991613
ENSG00000100461	RBM23	-0.159435	0.556169	0.816669
ENSG00000247626	MARS2	-2.39758	0.0502496	0.23707
ENSG00000134222	PSRC1	-2.39509	0.0453827	0.223303
ENSG00000100478	AP4S1	0.045878	0.955419	0.984251
ENSG00000100479	POLE2	-0.63694	0.651094	0.86382
ENSG00000100483	VCPKMT	-1.54498	0.231627	0.554085
ENSG00000100485	SOS2	0.379432	0.502832	0.783756
ENSG00000100490	CDKL1	-0.573913	0.670879	0.873448
ENSG00000100503	NIN	-0.142072	0.590734	0.834349
ENSG00000100504	PYGL	0.196834	0.398762	0.713544
ENSG00000163138	PACRGL	-2.39376	0.0288261	0.166707
ENSG00000100519	PSMC6	-0.00125298	0.995987	0.998215
ENSG00000100522	GNPNAT1	-0.98894	0.239921	0.563348
ENSG00000100523	DDHD1	-0.696552	0.431105	0.735529
ENSG00000232811	AL360270.1	-2.39207	0.149537	0.444997
ENSG00000068078	FGFR3	-2.39008	0.102864	0.361922
ENSG00000100532	CGRRF1	0.206355	0.75944	0.910362
ENSG00000100554	ATP6V1D	-0.075226	0.838364	0.942089
ENSG00000100564	PIGH	0.424252	0.372026	0.693082
ENSG00000102780	DGKH	-2.38748	0.114385	0.385745
ENSG00000100568	VTI1B	-0.0126713	0.956661	0.984436
ENSG00000154760	SLFN13	-2.38587	0.0253416	0.153703
ENSG00000264112	AC015813.1	-2.38539	0.0783458	0.310895
ENSG00000153044	CENPH	-2.38523	4.48201e-09	3.72183e-07
ENSG00000100580	TMED8	0.19881	0.458176	0.753114
ENSG00000267041	ZNF850	-2.38403	0.0424882	0.214121
ENSG00000100592	DAAM1	-0.59087	0.506418	0.786836
ENSG00000100596	SPTLC2	-0.112448	0.63545	0.856143
ENSG00000261840	AC093249.6	-2.38256	0.142675	0.432413
ENSG00000100601	ALKBH1	-0.533822	0.286443	0.616469
ENSG00000100603	SNW1	0.315707	0.281708	0.611263
ENSG00000100605	ITPK1	0.249537	0.237531	0.560317
ENSG00000100612	DHRS7	0.392678	0.242471	0.567082
ENSG00000203883	SOX18	-2.38236	0.081224	0.316762
ENSG00000164828	SUN1	-2.38172	0.0093955	0.0781513
ENSG00000100629	CEP128	-0.150124	0.870993	0.954442
ENSG00000132199	ENOSF1	-2.38053	0.0383623	0.201433
ENSG00000111727	HCFC2	-2.38018	0.022287	0.141627
ENSG00000215251	FASTKD5	-2.37824	0.0191888	0.127704
ENSG00000168497	CAVIN2	-2.37632	0.0184379	0.124557
ENSG00000264272	AC100786.1	-2.37627	0.127695	0.407922
ENSG00000100678	SLC8A3	-0.145992	0.908576	0.967669
ENSG00000100697	DICER1	-0.144922	0.719346	0.892226
ENSG00000100711	ZFYVE21	-1.13726	0.196258	0.511564
ENSG00000101298	SNPH	-2.37516	0.134861	0.419611
ENSG00000100722	ZC3H14	-0.192043	0.604679	0.843025
ENSG00000152219	ARL14EP	-2.37493	0.0191737	0.12766
ENSG00000254978	ALG1L9P	-2.37455	0.0522377	0.242879
ENSG00000100744	GSKIP	0.115266	0.86885	0.953272
ENSG00000172361	CFAP53	-2.37106	0.140151	0.428276
ENSG00000100764	PSMC1	0.0106294	0.949778	0.981839
ENSG00000100767	PAPLN	-0.175681	0.890116	0.961151
ENSG00000100784	RPS6KA5	-0.198141	0.828705	0.937512
ENSG00000100796	PPP4R3A	0.157909	0.422401	0.728826
ENSG00000100802	C14orf93	0.0745667	0.875235	0.955351
ENSG00000100804	PSMB5	-0.167619	0.515449	0.792228
ENSG00000100811	YY1	-0.0249603	0.872585	0.954888
ENSG00000135976	ANKRD36	-2.37065	0.114671	0.386209
ENSG00000105865	DUS4L	-2.37063	0.0366888	0.195516
ENSG00000100815	TRIP11	-0.314719	0.699117	0.884427
ENSG00000100823	APEX1	0.0608633	0.774952	0.916512
ENSG00000100836	PABPN1	-0.192259	0.353945	0.677459
ENSG00000175741	RWDD4P2	-2.36922	0.107263	0.371501
ENSG00000146858	ZC3HAV1L	-2.36704	0.0381538	0.200668
ENSG00000103121	CMC2	-2.36698	1.10225e-06	4.70878e-05
ENSG00000100888	CHD8	-0.275498	0.406944	0.718634
ENSG00000163328	GPR155	-2.36638	0.139743	0.427206
ENSG00000100890	KIAA0391	-1.06222	0.40272	0.716334
ENSG00000100897	DCAF11	0.199959	0.494815	0.778864
ENSG00000143126	CELSR2	-2.36468	0.126388	0.405864
ENSG00000210117	MT-TW	-2.36441	0.123247	0.400342
ENSG00000100908	EMC9	-0.114476	0.720901	0.893255
ENSG00000133119	RFC3	-2.36368	0.019924	0.131062
ENSG00000100916	BRMS1L	1.109	0.361041	0.683472
ENSG00000100918	REC8	0.21517	0.75212	0.906999
ENSG00000100926	TM9SF1	-0.192702	0.911149	0.968827
ENSG00000100934	SEC23A	-0.657379	0.266848	0.593662
ENSG00000169994	MYO7B	-2.36263	0.0768291	0.307171
ENSG00000068001	HYAL2	-2.35703	0.0193078	0.12838
ENSG00000100949	RABGGTA	0.114344	0.747229	0.904643
ENSG00000233718	MYCNOS	-2.35535	0.00942866	0.0783566
ENSG00000100982	PCIF1	-0.181178	0.45689	0.751996
ENSG00000100983	GSS	-0.173966	0.382883	0.701168
ENSG00000100985	MMP9	-0.14974	0.841635	0.94337
ENSG00000100991	TRPC4AP	-0.0300372	0.880319	0.957327
ENSG00000247746	USP51	-2.35505	0.0778345	0.309766
ENSG00000100997	ABHD12	-0.0478186	0.825098	0.936473
ENSG00000101000	PROCR	0.32948	0.676233	0.87602
ENSG00000156802	ATAD2	-2.35197	1.45756e-13	3.98968e-11
ENSG00000225439	BOLA3-AS1	-2.35145	0.170454	0.477254
ENSG00000101019	UQCC1	0.0749502	0.855258	0.948441
ENSG00000101040	ZMYND8	-0.290341	0.243219	0.568203
ENSG00000101052	IFT52	-0.340496	0.538748	0.805669
ENSG00000106004	HOXA5	-2.35007	7.93781e-05	0.00176966
ENSG00000196724	ZNF418	-2.34975	0.134971	0.419611
ENSG00000101082	SLA2	0.262389	0.283107	0.612591
ENSG00000101084	C20orf24	-0.00721055	0.99157	0.996296
ENSG00000101096	NFATC2	0.541146	0.422245	0.728826
ENSG00000204620	AC115618.1	-2.34772	0.0349626	0.190164
ENSG00000101109	STK4	0.0351682	0.914604	0.970294
ENSG00000101126	ADNP	-0.0857689	0.830053	0.937998
ENSG00000175536	LIPT2	-2.34494	0.0611658	0.267641
ENSG00000101138	CSTF1	-0.221654	0.404906	0.717788
ENSG00000101146	RAE1	0.192888	0.628639	0.852823
ENSG00000113966	ARL6	-2.34432	0.110378	0.37845
ENSG00000215417	MIR17HG	-2.34417	0.0350074	0.190307
ENSG00000101158	NELFCD	-0.265988	0.223479	0.54491
ENSG00000274259	AL662799.1	-2.3427	0.138755	0.425593
ENSG00000198797	BRINP2	-2.34227	0.16976	0.476131
ENSG00000101162	TUBB1	0.990246	0.532176	0.802064
ENSG00000101166	PRELID3B	0.144868	0.630635	0.853844
ENSG00000101181	MTG2	-0.0856589	0.796237	0.924518
ENSG00000145777	TSLP	-2.34206	0.148678	0.443334
ENSG00000171241	SHCBP1	-2.34021	0.00479248	0.047383
ENSG00000101188	NTSR1	-1.05907	0.319407	0.650014
ENSG00000101189	MRGBP	-0.0697129	0.759488	0.910362
ENSG00000101190	TCFL5	-0.286519	0.499955	0.781661
ENSG00000176890	TYMS	-2.33975	2.90735e-09	2.55795e-07
ENSG00000101193	GID8	0.0468477	0.809588	0.929944
ENSG00000101194	SLC17A9	-0.241237	0.263115	0.589782
ENSG00000270959	LPP-AS2	-2.33562	0.114185	0.385247
ENSG00000101210	EEF1A2	-0.721776	0.322023	0.652888
ENSG00000101216	GMEB2	0.0862775	0.716242	0.891179
ENSG00000101220	C20orf27	-0.417046	0.275262	0.60321
ENSG00000151881	TMEM267	-2.33426	0.0624097	0.271157
ENSG00000101236	RNF24	0.147271	0.472676	0.763653
ENSG00000101246	ARFRP1	0.211382	0.439979	0.74146
ENSG00000101247	NDUFAF5	-0.107138	0.871608	0.954738
ENSG00000101255	TRIB3	-0.0672282	0.878267	0.956359
ENSG00000104490	NCALD	-2.33397	0.0494069	0.234065
ENSG00000122966	CIT	-2.33222	1.57002e-06	6.48227e-05
ENSG00000101290	CDS2	-0.0997221	0.770658	0.915177
ENSG00000101294	HM13	0.164301	0.40201	0.716028
ENSG00000062282	DGAT2	-2.32961	0.127692	0.407922
ENSG00000123737	EXOSC9	-2.32787	0.000803808	0.0119168
ENSG00000137804	NUSAP1	-2.3278	1.46636e-07	7.91546e-06
ENSG00000101310	SEC23B	-0.287014	0.319278	0.650014
ENSG00000101311	FERMT1	-1.84435	0.195399	0.510553
ENSG00000101336	HCK	0.176384	0.669805	0.872838
ENSG00000101337	TM9SF4	-0.360286	0.288431	0.618772
ENSG00000101342	TLDC2	0.472102	0.667853	0.87181
ENSG00000101343	CRNKL1	-0.108369	0.796667	0.924587
ENSG00000101346	POFUT1	-0.400951	0.334606	0.662013
ENSG00000185442	FAM174B	-2.32671	0.0533267	0.245188
ENSG00000101350	KIF3B	0.150556	0.682552	0.878448
ENSG00000101353	MROH8	-0.318272	0.821212	0.934767
ENSG00000261326	LINC01355	-2.3258	0.158332	0.457723
ENSG00000101363	MANBAL	0.426547	0.324303	0.654228
ENSG00000101365	IDH3B	0.20506	0.333335	0.66089
ENSG00000101367	MAPRE1	-0.300514	0.194212	0.508711
ENSG00000101384	JAG1	0.167257	0.775921	0.916924
ENSG00000101391	CDK5RAP1	-0.318744	0.361998	0.684233
ENSG00000101400	SNTA1	-0.932918	0.282896	0.612424
ENSG00000101407	TTI1	-0.318803	0.393845	0.710156
ENSG00000239900	ADSL	-2.32413	0.0706299	0.292943
ENSG00000280300	AC117503.5	-2.31956	0.0795799	0.313505
ENSG00000101417	PXMP4	-0.218798	0.64011	0.858369
ENSG00000101421	CHMP4B	0.193467	0.231032	0.554085
ENSG00000266954	AP001010.1	-2.31817	0.104486	0.365455
ENSG00000101442	ACTR5	-0.958928	0.200378	0.516479
ENSG00000101444	AHCY	-0.104437	0.511622	0.789435
ENSG00000166432	ZMAT1	-2.3166	0.0200852	0.131822
ENSG00000247121	AC009126.1	-2.30853	0.12116	0.396999
ENSG00000101452	DHX35	-1.07761	0.348026	0.672266
ENSG00000101457	DNTTIP1	0.275291	0.459591	0.753908
ENSG00000274290	HIST1H2BE	-2.30566	0.110188	0.378026
ENSG00000154429	CCSAP	-2.30513	0.0462319	0.225636
ENSG00000101474	APMAP	0.0716692	0.728063	0.896716
ENSG00000101493	ZNF516	0.157824	0.586026	0.831727
ENSG00000101544	ADNP2	0.360336	0.626318	0.852292
ENSG00000101546	RBFA	-0.927814	0.254646	0.579554
ENSG00000269792	AC011500.3	-2.3036	0.0486012	0.232505
ENSG00000101558	VAPA	0.0947928	0.653396	0.864283
ENSG00000101574	METTL4	-0.637865	0.475062	0.765663
ENSG00000101577	LPIN2	0.145653	0.705608	0.886157
ENSG00000145476	CYP4V2	-2.30144	0.0275613	0.162789
ENSG00000263513	FAM72C	-2.30137	0.0523269	0.242906
ENSG00000178199	ZC3H12D	-2.30093	0.0515277	0.240946
ENSG00000185798	WDR53	-2.29967	0.00427481	0.0437273
ENSG00000139190	VAMP1	-2.29881	0.0407335	0.209128
ENSG00000101654	RNMT	-0.149322	0.67644	0.87602
ENSG00000120756	PLS1	-2.29491	0.144815	0.436483
ENSG00000171084	FAM86JP	-2.2939	0.0812009	0.316762
ENSG00000239388	ASB14	-2.29068	0.0927512	0.341319
ENSG00000101751	POLI	-0.123139	0.897201	0.964102
ENSG00000125246	CLYBL	-2.29003	0.0532699	0.245188
ENSG00000176659	C20orf197	-2.28909	0.136885	0.422727
ENSG00000101782	RIOK3	0.248999	0.324552	0.65455
ENSG00000225062	CATIP-AS1	-2.28865	0.128475	0.408961
ENSG00000101843	PSMD10	-0.113525	0.743966	0.90306
ENSG00000101844	ATG4A	-0.373604	0.609904	0.844762
ENSG00000101846	STS	-0.379499	0.743555	0.902857
ENSG00000101849	TBL1X	0.0214737	0.964653	0.986955
ENSG00000140511	HAPLN3	-2.28747	0.127867	0.408207
ENSG00000115687	PASK	-2.2858	0.00404447	0.041893
ENSG00000101882	NKAP	0.0780944	0.94748	0.981658
ENSG00000101888	NXT2	-0.105958	0.732533	0.898633
ENSG00000101901	ALG13	-0.365214	0.490948	0.776616
ENSG00000101911	PRPS2	-0.308962	0.254176	0.579066
ENSG00000267277	AC024575.1	-2.2852	0.171938	0.479964
ENSG00000281207	SLFNL1-AS1	-2.28097	0.065926	0.280822
ENSG00000144354	CDCA7	-2.27698	0.0107889	0.0861539
ENSG00000166707	ZCCHC18	-2.27442	0.0643555	0.276551
ENSG00000172575	RASGRP1	-2.2703	0.076671	0.306817
ENSG00000158423	RIBC1	-2.26976	0.177506	0.486999
ENSG00000266941	AC024592.1	-2.26842	0.125009	0.403002
ENSG00000123552	USP45	-2.26298	0.0422075	0.213151
ENSG00000101997	CCDC22	-0.0101164	0.978934	0.992808
ENSG00000102001	CACNA1F	-0.0127834	0.992656	0.996876
ENSG00000102003	SYP	0.056928	0.96049	0.985614
ENSG00000173207	CKS1B	-2.26295	0.000377454	0.00642758
ENSG00000143995	MEIS1	-2.26016	0.0756012	0.304154
ENSG00000102030	NAA10	0.0486029	0.874604	0.955333
ENSG00000227540	DNAJC9-AS1	-2.25979	0.180327	0.490688
ENSG00000102034	ELF4	0.0892941	0.708436	0.887532
ENSG00000120800	UTP20	-2.25732	0.0370299	0.196956
ENSG00000102057	KCND1	0.638765	0.50964	0.788217
ENSG00000102078	SLC25A14	-0.246492	0.76892	0.914063
ENSG00000102081	FMR1	0.246427	0.617154	0.84873
ENSG00000156398	SFXN2	-2.25332	0.0239531	0.148476
ENSG00000261396	AC027682.5	-2.2527	0.107141	0.371501
ENSG00000102100	SLC35A2	-0.571828	0.192822	0.506864
ENSG00000231663	AL355472.1	-2.24891	0.0598871	0.264
ENSG00000102119	EMD	0.257922	0.287566	0.617707
ENSG00000103047	TANGO6	-2.24841	0.11319	0.383816
ENSG00000279713	AC080038.3	-2.24813	0.0803539	0.314955
ENSG00000102145	GATA1	-0.476766	0.669896	0.87286
ENSG00000175564	UCP3	-2.24546	0.182302	0.493518
ENSG00000102172	SMS	-0.16514	0.426688	0.732519
ENSG00000102178	UBL4A	0.0952484	0.698335	0.884156
ENSG00000102181	CD99L2	-0.0529305	0.846258	0.945397
ENSG00000102189	EEA1	-1.32406	0.264029	0.590209
ENSG00000102218	RP2	-0.538245	0.207504	0.525615
ENSG00000274767	AC243829.1	-2.2438	0.126468	0.405864
ENSG00000102225	CDK16	0.048221	0.829084	0.937512
ENSG00000260304	AC009088.2	-2.23997	0.00178843	0.0226554
ENSG00000170962	PDGFD	-2.23987	0.130108	0.411807
ENSG00000162063	CCNF	-2.23945	6.23053e-08	3.72848e-06
ENSG00000221930	FAM45BP	-2.23837	0.056064	0.25297
ENSG00000164930	FZD6	-2.2379	0.160664	0.46148
ENSG00000102309	PIN4	0.0438345	0.896153	0.963972
ENSG00000102312	PORCN	0.00158401	0.997797	0.998937
ENSG00000111247	RAD51AP1	-2.2369	7.41045e-06	0.000247814
ENSG00000255276	RRM1-AS1	-2.23142	0.00385551	0.0403886
ENSG00000102359	SRPX2	-0.213519	0.831104	0.938305
ENSG00000102362	SYTL4	-0.680949	0.402762	0.716334
ENSG00000124198	ARFGEF2	-2.2238	0.00233087	0.0276727
ENSG00000102390	PBDC1	0.0205681	0.969047	0.989411
ENSG00000091127	PUS7	-2.22322	0.0179768	0.122337
ENSG00000102401	ARMCX3	-0.0952757	0.823904	0.935816
ENSG00000183763	TRAIP	-2.22313	0.00161617	0.0208453
ENSG00000238186	AL603839.2	-2.22178	0.0832165	0.321364
ENSG00000102471	NDFIP2	0.504593	0.625797	0.851976
[truncated: 12,782 more rows]

## Sheet: t(6;9)-Omacetaxine
Ensembl gene id	Gene name	log2FoldChange	pvalue	padj
ENSG00000000938	FGR	-0.181789	0.246202	0.846507
ENSG00000000971	CFH	0.126277	0.541901	0.939509
ENSG00000001036	FUCA2	0.0361433	0.823484	0.97834
ENSG00000001497	LAS1L	-0.144819	0.419525	0.905077
ENSG00000002330	BAD	0.0691416	0.668247	0.959178
ENSG00000002549	LAP3	0.079838	0.645774	0.959178
ENSG00000002586	CD99	-0.00561804	0.963659	0.995514
ENSG00000002822	MAD1L1	0.0196958	0.896465	0.988374
ENSG00000002834	LASP1	-0.102633	0.412522	0.904256
ENSG00000002919	SNX11	0.0441422	0.773934	0.970797
ENSG00000003056	M6PR	0.0371741	0.812492	0.9747
ENSG00000003393	ALS2	-0.216779	0.184279	0.795498
ENSG00000003402	CFLAR	-0.151926	0.202287	0.817272
ENSG00000003756	RBM5	-0.260519	0.123968	0.742917
ENSG00000004059	ARF5	-0.00311931	0.982682	0.996475
ENSG00000004142	POLDIP2	0.0977076	0.441217	0.913911
ENSG00000004399	PLXND1	-0.202778	0.130005	0.754394
ENSG00000004455	AK2	0.178959	0.141298	0.763872
ENSG00000004468	CD38	-0.138358	0.44227	0.913911
ENSG00000004478	FKBP4	-0.167084	0.214118	0.826084
ENSG00000004487	KDM1A	-0.0836431	0.590262	0.949317
ENSG00000004534	RBM6	-0.325437	0.155698	0.773943
ENSG00000004779	NDUFAB1	0.0576377	0.706222	0.964308
ENSG00000004897	CDC27	-0.141005	0.35207	0.887612
ENSG00000004975	DVL2	-0.0154629	0.926825	0.992661
ENSG00000005007	UPF1	-0.234999	0.0504802	0.578767
ENSG00000005020	SKAP2	0.119211	0.449025	0.916115
ENSG00000005022	SLC25A5	-0.195719	0.0790352	0.676027
ENSG00000005075	POLR2J	0.209519	0.221043	0.835262
ENSG00000005156	LIG3	-0.0768317	0.558999	0.942907
ENSG00000005187	ACSM3	-0.215873	0.23424	0.836413
ENSG00000005194	CIAPIN1	0.0525811	0.749893	0.970797
ENSG00000005206	SPPL2B	-0.38421	0.0579724	0.599753
ENSG00000005339	CREBBP	0.116162	0.481338	0.929611
ENSG00000005379	TSPOAP1	-0.0438443	0.857121	0.98479
ENSG00000179163	FUCA1	-1.34312	0.00979553	0.32509
ENSG00000005483	KMT2E	-0.125712	0.55497	0.942645
ENSG00000005486	RHBDD2	0.235329	0.0701954	0.640503
ENSG00000005810	MYCBP2	0.205172	0.329166	0.886576
ENSG00000005812	FBXL3	0.211976	0.20617	0.820016
ENSG00000005844	ITGAL	0.138137	0.401919	0.898817
ENSG00000005893	LAMP2	0.111214	0.565361	0.944776
ENSG00000005961	ITGA2B	-0.222901	0.177053	0.794168
ENSG00000006007	GDE1	0.106907	0.397268	0.898604
ENSG00000006015	REX1BD	0.127278	0.506433	0.932134
ENSG00000006125	AP2B1	-0.157468	0.207061	0.820277
ENSG00000006282	SPATA20	-0.284718	0.164417	0.778324
ENSG00000006451	RALA	0.199496	0.160466	0.776582
ENSG00000006534	ALDH3B1	-0.209738	0.136647	0.760254
ENSG00000006712	PAF1	-0.00170469	0.990668	0.997455
ENSG00000006715	VPS41	0.135054	0.314796	0.883551
ENSG00000006744	ELAC2	0.00525412	0.968327	0.996323
ENSG00000006756	ARSD	-0.14591	0.340962	0.887612
ENSG00000006831	ADIPOR2	0.0710174	0.533879	0.936797
ENSG00000007038	PRSS21	-0.0550047	0.713557	0.966187
ENSG00000007080	CCDC124	0.153836	0.380962	0.898604
ENSG00000007168	PAFAH1B1	0.0397124	0.764771	0.970797
ENSG00000007202	KIAA0100	-0.0641061	0.606178	0.956406
ENSG00000007237	GAS7	0.217991	0.157099	0.775602
ENSG00000007255	TRAPPC6A	0.0443424	0.78338	0.970797
ENSG00000007264	MATK	-0.116559	0.499771	0.932134
ENSG00000007376	RPUSD1	-0.130725	0.408555	0.902227
ENSG00000007392	LUC7L	-0.247273	0.320792	0.885655
ENSG00000007520	TSR3	-0.0278141	0.867958	0.984971
ENSG00000007541	PIGQ	-0.0896578	0.578797	0.946972
ENSG00000007923	DNAJC11	0.255124	0.0797325	0.67606
ENSG00000008018	PSMB1	-0.010124	0.936663	0.993741
ENSG00000008083	JARID2	0.00184799	0.990183	0.997455
ENSG00000008130	NADK	-0.134704	0.319253	0.885655
ENSG00000008282	SYPL1	0.246081	0.0679818	0.633118
ENSG00000008294	SPAG9	-0.0545212	0.731373	0.967647
ENSG00000008394	MGST1	-0.0367844	0.764617	0.970797
ENSG00000008441	NFIX	-0.0170283	0.883025	0.988134
ENSG00000008513	ST3GAL1	0.280953	0.115419	0.731636
ENSG00000008710	PKD1	-0.346116	0.0801173	0.677145
ENSG00000008838	MED24	0.108957	0.41317	0.904464
ENSG00000064601	CTSA	-1.25072	7.41774e-25	3.91211e-21
ENSG00000008988	RPS20	0.021654	0.862949	0.984971
ENSG00000009307	CSDE1	-0.040872	0.752695	0.970797
ENSG00000009335	UBE3C	-0.0501613	0.746781	0.970797
ENSG00000009790	TRAF3IP3	0.173698	0.333409	0.886576
ENSG00000009844	VTA1	0.328193	0.0450364	0.566879
ENSG00000009954	BAZ1B	0.00450429	0.974231	0.996323
ENSG00000010017	RANBP9	-0.0189898	0.897647	0.988374
ENSG00000196415	PRTN3	-1.19992	2.52647e-18	6.66231e-15
ENSG00000010244	ZNF207	-0.0626466	0.611086	0.956406
ENSG00000010256	UQCRC1	0.0585934	0.691465	0.961985
ENSG00000010270	STARD3NL	0.0726512	0.636296	0.959178
ENSG00000010278	CD9	0.146971	0.51299	0.932134
ENSG00000010292	NCAPD2	-0.146058	0.263732	0.850717
ENSG00000010295	IFFO1	-0.412147	0.0935328	0.699449
ENSG00000010322	NISCH	-0.057514	0.737084	0.968531
ENSG00000010327	STAB1	0.0610683	0.769887	0.970797
ENSG00000010361	FUZ	0.0848822	0.592502	0.949317
ENSG00000010404	IDS	0.0776955	0.58671	0.949317
ENSG00000010610	CD4	0.244415	0.311142	0.881616
ENSG00000100979	PLTP	-1.17463	3.64976e-14	6.41628e-11
ENSG00000011007	ELOA	-0.0137991	0.927211	0.992661
ENSG00000011009	LYPLA2	-0.0824476	0.591796	0.949317
ENSG00000011028	MRC2	0.340091	0.0493881	0.578539
ENSG00000011198	ABHD5	0.136575	0.493296	0.932134
ENSG00000011243	AKAP8L	-0.199636	0.339051	0.887612
ENSG00000011260	UTP18	-0.0602092	0.681876	0.960599
ENSG00000011275	RNF216	0.175851	0.258854	0.850717
ENSG00000011295	TTC19	0.0683963	0.633699	0.959178
ENSG00000011304	PTBP1	-0.131724	0.23562	0.837371
ENSG00000011422	PLAUR	0.177959	0.210117	0.822647
ENSG00000011451	WIZ	-0.0752288	0.632636	0.959178
ENSG00000011478	QPCTL	0.0885398	0.607223	0.956406
ENSG00000011485	PPP5C	-0.161876	0.307343	0.881616
ENSG00000104918	RETN	-1.15636	4.38363e-09	5.77981e-06
ENSG00000012061	ERCC1	0.087657	0.5318	0.936797
ENSG00000012660	ELOVL5	0.110061	0.46644	0.923607
ENSG00000012817	KDM5D	-0.373369	0.0556427	0.592848
ENSG00000012822	CALCOCO1	-0.175743	0.392116	0.898604
ENSG00000012963	UBR7	0.15753	0.301005	0.881616
ENSG00000013275	PSMC4	0.241741	0.151675	0.770007
ENSG00000013288	MAN2B2	-0.0581578	0.733902	0.967647
ENSG00000013306	SLC25A39	-0.0712758	0.651104	0.959178
ENSG00000013364	MVP	-0.166346	0.225389	0.835262
ENSG00000271984	AL008726.1	-1.01967	5.02802e-06	0.00265178
ENSG00000013441	CLK1	-0.243809	0.246519	0.846507
ENSG00000013563	DNASE1L1	-0.238894	0.139549	0.763233
ENSG00000013583	HEBP1	-0.156641	0.340879	0.887612
ENSG00000013810	TACC3	-0.161247	0.215948	0.830127
ENSG00000014164	ZC3H3	-0.123512	0.44199	0.913911
ENSG00000014216	CAPN1	-0.114258	0.405818	0.900737
ENSG00000014641	MDH1	-0.240546	0.131417	0.754394
ENSG00000014824	SLC30A9	0.171928	0.258031	0.850717
ENSG00000014919	COX15	0.0540457	0.716023	0.967327
ENSG00000015285	WAS	-0.0586377	0.668199	0.959178
ENSG00000015475	BID	-0.127408	0.457935	0.921058
ENSG00000015676	NUDCD3	-0.0430169	0.752291	0.970797
ENSG00000016864	GLT8D1	-0.0497484	0.729219	0.967647
ENSG00000017260	ATP2C1	0.0119396	0.934565	0.992661
ENSG00000017797	RALBP1	0.19542	0.186937	0.798952
ENSG00000018510	AGPS	0.129706	0.378728	0.898604
ENSG00000018699	TTC27	0.176583	0.334712	0.886576
ENSG00000019582	CD74	-0.291833	0.0471556	0.570044
ENSG00000020181	ADGRA2	0.0052186	0.974094	0.996323
ENSG00000020633	RUNX3	0.284419	0.125585	0.744608
ENSG00000021355	SERPINB1	0.0632715	0.5064	0.932134
ENSG00000021762	OSBPL5	-0.067865	0.673253	0.960599
ENSG00000021776	AQR	-0.181844	0.288941	0.871114
ENSG00000022277	RTFDC1	0.052628	0.694287	0.961985
ENSG00000022840	RNF10	0.150242	0.181605	0.79479
ENSG00000023041	ZDHHC6	0.0576604	0.723049	0.967647
ENSG00000023191	RNH1	-0.248582	0.0425189	0.561242
ENSG00000023228	NDUFS1	0.0999459	0.502339	0.932134
ENSG00000023318	ERP44	0.0114719	0.952544	0.994746
ENSG00000023330	ALAS1	-0.0686322	0.588139	0.949317
ENSG00000023445	BIRC3	0.385036	0.037411	0.528867
ENSG00000023734	STRAP	0.0904178	0.512847	0.932134
ENSG00000023892	DEF6	0.0427967	0.778789	0.970797
ENSG00000023902	PLEKHO1	0.124014	0.400217	0.898604
ENSG00000024048	UBR2	-0.0278939	0.876114	0.985928
ENSG00000024422	EHD2	-0.0502952	0.765507	0.970797
ENSG00000025039	RRAGD	-0.144428	0.386556	0.898604
ENSG00000025293	PHF20	-0.0476333	0.764994	0.970797
ENSG00000025708	TYMP	0.179395	0.321159	0.885655
ENSG00000025770	NCAPH2	0.15429	0.301132	0.881616
ENSG00000025796	SEC63	0.0172513	0.89018	0.988374
ENSG00000025800	KPNA6	0.140084	0.350806	0.887612
ENSG00000026025	VIM	-0.162926	0.211256	0.823436
ENSG00000026297	RNASET2	-0.220365	0.221563	0.835262
ENSG00000026508	CD44	0.0503257	0.7152	0.96709
ENSG00000182557	SPNS3	-0.859305	0.000193661	0.0386703
ENSG00000027869	SH2D2A	0.27574	0.0530991	0.584644
ENSG00000028137	TNFRSF1B	0.0830586	0.601589	0.955369
ENSG00000028310	BRD9	-0.16617	0.294368	0.877505
ENSG00000028528	SNX1	0.0803658	0.526952	0.935065
ENSG00000029363	BCLAF1	0.142672	0.251813	0.847364
ENSG00000029364	SLC39A9	0.110622	0.433137	0.909974
ENSG00000029725	RABEP1	-0.0494829	0.770892	0.970797
ENSG00000124107	SLPI	-0.830727	0.000476064	0.0678584
ENSG00000030066	NUP160	-0.0721282	0.702188	0.963501
ENSG00000030110	BAK1	0.0123044	0.939461	0.993741
ENSG00000030582	GRN	-0.17991	0.215655	0.830127
ENSG00000031003	FAM13B	0.0294171	0.863863	0.984971
ENSG00000031698	SARS	-0.0479371	0.733948	0.967647
ENSG00000031823	RANBP3	0.0973187	0.472334	0.927539
ENSG00000032444	PNPLA6	0.045676	0.725675	0.967647
ENSG00000033011	ALG1	0.0645951	0.697036	0.961985
ENSG00000033050	ABCF2	-0.136836	0.376338	0.89696
ENSG00000033100	CHPF2	0.0240195	0.861364	0.98479
ENSG00000033327	GAB2	0.174329	0.258429	0.850717
ENSG00000033627	ATP6V0A1	-0.223278	0.101627	0.715847
ENSG00000033800	PIAS1	0.124526	0.427482	0.907332
ENSG00000034152	MAP2K3	0.105698	0.36884	0.894785
ENSG00000034510	TMSB10	-0.320829	0.0739228	0.659677
ENSG00000034713	GABARAPL2	0.117948	0.408666	0.902227
ENSG00000035141	FAM136A	0.138	0.396517	0.898604
ENSG00000035403	VCL	0.0910499	0.674988	0.960599
ENSG00000035681	NSMAF	0.265861	0.0586568	0.60186
ENSG00000035862	TIMP2	-0.0983409	0.48155	0.929611
ENSG00000035928	RFC1	0.278472	0.113971	0.731504
ENSG00000036054	TBC1D23	0.187769	0.181785	0.79479
ENSG00000036257	CUL3	-0.0530811	0.714645	0.966667
ENSG00000037474	NSUN2	-0.0639955	0.660426	0.959178
ENSG00000037637	FBXO42	0.235196	0.142015	0.764187
ENSG00000112715	VEGFA	-0.692557	0.0013558	0.125448
ENSG00000038532	CLEC16A	0.142403	0.373466	0.896832
ENSG00000110492	MDK	-0.688629	0.000292382	0.0497426
ENSG00000039523	RIPOR1	-0.0349966	0.838162	0.980477
ENSG00000039650	PNKP	-0.168774	0.320921	0.885655
ENSG00000040531	CTNS	0.0993169	0.448219	0.915563
ENSG00000040633	PHF23	-0.113195	0.416353	0.905077
ENSG00000041353	RAB27B	0.168512	0.453558	0.918612
ENSG00000041357	PSMA4	-0.101481	0.512578	0.932134
ENSG00000041988	THAP3	0.192995	0.269335	0.855699
ENSG00000042493	CAPG	0.217197	0.162038	0.778324
ENSG00000042753	AP2S1	-0.124715	0.482725	0.929923
ENSG00000043093	DCUN1D1	0.212083	0.216967	0.830127
ENSG00000043143	JADE2	0.0933957	0.557743	0.942907
ENSG00000043462	LCP2	0.0578889	0.683646	0.960812
ENSG00000044115	CTNNA1	-0.0275158	0.867259	0.984971
ENSG00000044446	PHKA2	-0.213614	0.213763	0.825481
ENSG00000044574	HSPA5	-0.372898	0.0538387	0.586664
ENSG00000047056	WDR37	-0.133594	0.49982	0.932134
ENSG00000047249	ATP6V1H	0.0703803	0.702065	0.963501
ENSG00000047315	POLR2B	-0.142257	0.312697	0.882336
ENSG00000047410	TPR	-0.18804	0.319362	0.885655
ENSG00000047849	MAP4	-0.0677803	0.631097	0.959178
ENSG00000048162	NOP16	-0.258053	0.0709414	0.64438
ENSG00000048471	SNX29	0.159473	0.405987	0.900737
ENSG00000101194	SLC17A9	-0.676942	0.00160806	0.137037
ENSG00000048740	CELF2	0.122534	0.376473	0.89696
ENSG00000048828	FAM120A	-0.0596329	0.665455	0.959178
ENSG00000049239	H6PD	0.0168353	0.894667	0.988374
ENSG00000049245	VAMP3	-0.0589575	0.701133	0.963501
ENSG00000049323	LTBP1	0.145635	0.695741	0.961985
ENSG00000049449	RCN1	-0.0419163	0.823677	0.97834
ENSG00000049541	RFC2	0.00126721	0.993528	0.997879
ENSG00000049618	ARID1B	-0.138195	0.357053	0.887612
ENSG00000049656	CLPTM1L	0.0340829	0.781338	0.970797
ENSG00000049860	HEXB	0.192568	0.183742	0.795498
ENSG00000050426	LETMD1	0.0115557	0.937375	0.993741
ENSG00000051009	FAM160A2	-0.0900411	0.571522	0.945853
ENSG00000128322	IGLL1	-0.670524	0.000239729	0.0433672
ENSG00000051128	HOMER3	-0.106805	0.4424	0.913911
ENSG00000051382	PIK3CB	0.160894	0.306239	0.881616
ENSG00000051523	CYBA	0.135083	0.344001	0.887612
ENSG00000051620	HEBP2	0.0209679	0.876665	0.985928
ENSG00000052749	RRP12	-0.0468924	0.778174	0.970797
ENSG00000052802	MSMO1	-0.296203	0.0745993	0.660775
ENSG00000052841	TTC17	0.123951	0.453012	0.918563
ENSG00000053254	FOXN3	0.113739	0.565279	0.944776
ENSG00000053371	AKR7A2	-0.0865937	0.542642	0.939841
ENSG00000053372	MRTO4	-0.204599	0.32075	0.885655
ENSG00000053501	USE1	0.159777	0.328688	0.886576
ENSG00000053770	AP5M1	0.299827	0.115196	0.731504
ENSG00000054116	TRAPPC3	0.167037	0.190998	0.805918
ENSG00000054118	THRAP3	-0.168496	0.20803	0.820608
ENSG00000204839	MROH6	-0.655401	0.0027774	0.183307
ENSG00000054277	OPN3	0.207888	0.193705	0.80695
ENSG00000054598	FOXC1	0.0415314	0.800333	0.971899
ENSG00000054611	TBC1D22A	0.00399578	0.97737	0.996323
ENSG00000054967	RELT	-0.178449	0.184885	0.795498
ENSG00000055044	NOP58	-0.2658	0.0554457	0.592198
ENSG00000055070	SZRD1	0.200145	0.12183	0.741827
ENSG00000055130	CUL1	-0.0465986	0.748618	0.970797
ENSG00000055163	CYFIP2	-0.244119	0.0922998	0.699449
ENSG00000055208	TAB2	0.0879227	0.608792	0.956406
ENSG00000055483	USP36	-0.0393385	0.81545	0.9747
ENSG00000055609	KMT2C	-0.112995	0.532266	0.936797
ENSG00000055917	PUM2	0.037812	0.787578	0.970797
ENSG00000055950	MRPL43	-0.0305468	0.847414	0.980883
ENSG00000056097	ZFR	0.26525	0.0841764	0.681839
ENSG00000056586	RC3H2	0.127443	0.425778	0.906792
ENSG00000056736	IL17RB	0.296184	0.16033	0.776582
ENSG00000057252	SOAT1	-0.0999951	0.566966	0.944911
ENSG00000057608	GDI2	-0.231111	0.0980571	0.705918
ENSG00000057757	PITHD1	-0.197094	0.196139	0.80942
ENSG00000058063	ATP11B	0.0999137	0.569733	0.945347
ENSG00000058262	SEC61A1	0.00870131	0.942803	0.99407
ENSG00000058272	PPP1R12A	0.261028	0.10644	0.721363
ENSG00000058668	ATP2B4	0.0599728	0.703228	0.963768
ENSG00000058804	NDC1	0.0402767	0.806085	0.974363
ENSG00000059122	FLYWCH1	-0.232294	0.121478	0.741827
ENSG00000059145	UNKL	-0.23644	0.126289	0.744608
ENSG00000059377	TBXAS1	0.092797	0.519988	0.934065
ENSG00000059573	ALDH18A1	-0.32098	0.0513094	0.581516
ENSG00000059588	TARBP1	-0.336396	0.0932992	0.699449
ENSG00000163956	LRPAP1	-0.639963	3.39672e-06	0.00199048
ENSG00000059804	SLC2A3	0.190388	0.162454	0.778324
ENSG00000060069	CTDP1	0.124981	0.34102	0.887612
ENSG00000060138	YBX3	-0.238697	0.0475103	0.570044
ENSG00000060237	WNK1	-0.060879	0.724698	0.967647
ENSG00000118705	RPN2	-0.601603	0.000156869	0.0330931
ENSG00000060491	OGFR	-0.117446	0.450156	0.91669
ENSG00000060558	GNA15	-0.0792642	0.493877	0.932134
ENSG00000060688	SNRNP40	0.253947	0.104993	0.720716
ENSG00000060971	ACAA1	-0.0443778	0.79479	0.971551
ENSG00000061273	HDAC7	0.231755	0.131607	0.754394
ENSG00000061794	MRPS35	0.151122	0.374611	0.896832
ENSG00000061936	SFSWAP	0.0807867	0.679942	0.960599
ENSG00000061938	TNK2	-0.16875	0.31012	0.881616
ENSG00000204472	AIF1	-0.593401	0.00129885	0.124548
ENSG00000062485	CS	-0.237537	0.0772449	0.670049
ENSG00000062598	ELMO2	0.148406	0.328977	0.886576
ENSG00000062650	WAPL	0.260503	0.0882065	0.691723
ENSG00000062716	VMP1	0.10726	0.51308	0.932134
ENSG00000062822	POLD1	-0.0552909	0.809697	0.974379
ENSG00000063046	EIF4B	0.111036	0.363019	0.890187
ENSG00000063177	RPL18	0.0910871	0.499878	0.932134
ENSG00000063241	ISOC2	-0.470938	0.03485	0.516288
ENSG00000063244	U2AF2	-0.24726	0.0386135	0.535915
ENSG00000063245	EPN1	-0.172726	0.171173	0.78838
ENSG00000063322	MED29	0.259937	0.106596	0.721363
ENSG00000063978	RNF4	-0.0847213	0.545884	0.939841
ENSG00000064115	TM7SF3	0.0812284	0.591472	0.949317
ENSG00000064393	HIPK2	0.153231	0.498822	0.932134
ENSG00000064419	TNPO3	0.224851	0.0986768	0.708057
ENSG00000064490	RFXANK	-0.141359	0.37756	0.89696
ENSG00000224277	AP000345.1	-0.59213	0.00140014	0.127316
ENSG00000064607	SUGP2	-0.305046	0.191313	0.805918
ENSG00000064666	CNN2	-0.136246	0.288507	0.871114
ENSG00000064687	ABCA7	-0.0255422	0.90611	0.990225
ENSG00000064726	BTBD1	0.174968	0.260176	0.850717
ENSG00000064932	SBNO2	-0.107056	0.501178	0.932134
ENSG00000064961	HMG20B	-0.261885	0.0663329	0.625745
ENSG00000065000	AP3D1	-0.095789	0.398814	0.898604
ENSG00000065135	GNAI3	-0.0235456	0.870186	0.984971
ENSG00000065150	IPO5	0.040942	0.769004	0.970797
ENSG00000065268	WDR18	0.0180444	0.918484	0.992233
ENSG00000065427	KARS	0.093553	0.480219	0.929611
ENSG00000065491	TBC1D22B	-0.0799815	0.618707	0.957407
ENSG00000108679	LGALS3BP	-0.587662	0.000376331	0.0601445
ENSG00000065526	SPEN	-0.148818	0.480573	0.929611
ENSG00000065548	ZC3H15	0.0620801	0.661102	0.959178
ENSG00000065613	SLK	-0.104118	0.594949	0.950262
ENSG00000065615	CYB5R4	0.0664347	0.696126	0.961985
ENSG00000065802	ASB1	0.0428391	0.795431	0.971551
ENSG00000065809	FAM107B	0.112054	0.339693	0.887612
ENSG00000065882	TBC1D1	-0.0956917	0.506655	0.932134
ENSG00000065883	CDK13	0.0134263	0.9341	0.992661
ENSG00000065911	MTHFD2	0.0251414	0.867461	0.984971
ENSG00000065923	SLC9A7	0.0196969	0.918	0.992233
ENSG00000065970	FOXJ2	0.121066	0.434561	0.910197
ENSG00000065978	YBX1	-0.0759778	0.508716	0.932134
ENSG00000066027	PPP2R5A	0.300479	0.0428504	0.561242
ENSG00000066044	ELAVL1	-0.0378634	0.769008	0.970797
ENSG00000203804	ADAMTSL4-AS1	-0.582918	0.00431633	0.209864
ENSG00000066084	DIP2B	-0.172488	0.273768	0.859441
ENSG00000066117	SMARCD1	0.0203086	0.897284	0.988374
ENSG00000066135	KDM4A	-0.113251	0.389906	0.898604
ENSG00000066136	NFYC	0.216883	0.125851	0.744608
ENSG00000066294	CD84	0.13999	0.483503	0.929923
ENSG00000066322	ELOVL1	-0.0743637	0.59122	0.949317
ENSG00000066336	SPI1	0.0271246	0.822446	0.97834
ENSG00000066654	THUMPD1	-0.00453379	0.981777	0.996323
ENSG00000066777	ARFGEF1	0.0503147	0.776424	0.970797
ENSG00000067048	DDX3Y	0.124129	0.439531	0.913911
ENSG00000226950	DANCR	-0.573995	0.00973095	0.32509
ENSG00000067064	IDI1	-0.192976	0.208026	0.820608
ENSG00000067082	KLF6	0.214534	0.36429	0.892524
ENSG00000067113	PLPP1	0.286129	0.0522558	0.581516
ENSG00000067167	TRAM1	0.223751	0.114983	0.731504
ENSG00000067182	TNFRSF1A	0.0124323	0.924161	0.992661
ENSG00000067225	PKM	0.0356415	0.778675	0.970797
ENSG00000067334	DNTTIP2	0.201678	0.241747	0.843071
ENSG00000067369	TP53BP1	-0.0478076	0.756927	0.970797
ENSG00000067560	RHOA	-0.0150883	0.901582	0.989696
ENSG00000067596	DHX8	0.0111909	0.948609	0.994746
ENSG00000067704	IARS2	0.0227104	0.878823	0.986361
ENSG00000067829	IDH3G	-0.0313586	0.835214	0.980069
ENSG00000067836	ROGDI	-0.260924	0.0960651	0.702701
ENSG00000067900	ROCK1	0.254485	0.131364	0.754394
ENSG00000067955	CBFB	0.0924062	0.502456	0.932134
ENSG00000068024	HDAC4	0.355001	0.0717165	0.645806
ENSG00000068028	RASSF1	-0.193849	0.231965	0.836413
ENSG00000068120	COASY	-0.156225	0.319875	0.885655
ENSG00000068308	OTUD5	-0.169321	0.199023	0.813679
ENSG00000068323	TFE3	0.281005	0.0591402	0.602134
ENSG00000068366	ACSL4	0.0518883	0.734817	0.967647
ENSG00000068383	INPP5A	0.184938	0.258259	0.850717
ENSG00000068400	GRIPAP1	0.137169	0.366446	0.892898
ENSG00000068650	ATP11A	-0.032429	0.891274	0.988374
ENSG00000068654	POLR1A	-0.17214	0.282532	0.867332
ENSG00000068697	LAPTM4A	-0.0416486	0.796462	0.971551
ENSG00000068724	TTC7A	-0.202019	0.178299	0.79479
ENSG00000105639	JAK3	-0.556406	0.000246685	0.0433672
ENSG00000068831	RASGRP2	-0.225223	0.202118	0.817272
ENSG00000068878	PSME4	-0.0908845	0.546021	0.939841
ENSG00000068903	SIRT2	-0.116471	0.433725	0.909974
ENSG00000068912	ERLEC1	-0.117493	0.489883	0.931485
ENSG00000069248	NUP133	-0.0305091	0.846441	0.980883
ENSG00000069275	NUCKS1	-0.026711	0.859533	0.98479
ENSG00000069329	VPS35	0.232444	0.139836	0.763233
ENSG00000069345	DNAJA2	0.0483956	0.752684	0.970797
ENSG00000069399	BCL3	-0.0204548	0.895679	0.988374
ENSG00000069424	KCNAB2	-0.0659383	0.550264	0.941092
ENSG00000069849	ATP1B3	0.00319516	0.981722	0.996323
ENSG00000069956	MAPK6	0.126093	0.493418	0.932134
ENSG00000069974	RAB27A	0.140461	0.339699	0.887612
ENSG00000069998	HDHD5	0.033025	0.850157	0.982144
ENSG00000070010	UFD1	0.0195284	0.898045	0.988374
ENSG00000070047	PHRF1	-0.193209	0.162847	0.778324
ENSG00000070081	NUCB2	-0.00990473	0.940353	0.993741
ENSG00000070214	SLC44A1	0.204806	0.246294	0.846507
ENSG00000070366	SMG6	0.0520554	0.740489	0.970752
ENSG00000070367	EXOC5	0.208294	0.231639	0.836413
ENSG00000070413	DGCR2	-0.129791	0.397383	0.898604
ENSG00000070423	RNF126	-0.0154196	0.928692	0.992661
ENSG00000070444	MNT	-0.176547	0.308818	0.881616
ENSG00000070476	ZXDC	0.109233	0.514572	0.932469
ENSG00000070495	JMJD6	0.101374	0.534319	0.936797
ENSG00000070610	GBA2	-0.0367162	0.842387	0.980477
ENSG00000070614	NDST1	-0.0397643	0.766704	0.970797
ENSG00000070756	PABPC1	-0.0800392	0.565325	0.944776
ENSG00000070770	CSNK2A2	-0.069451	0.649138	0.959178
ENSG00000070814	TCOF1	0.0918402	0.512349	0.932134
ENSG00000070831	CDC42	-0.0409186	0.741679	0.970797
ENSG00000070882	OSBPL3	-0.145874	0.359263	0.888129
ENSG00000070961	ATP2B1	0.216591	0.246743	0.846507
ENSG00000071054	MAP4K4	0.154891	0.229706	0.836413
ENSG00000071082	RPL31	0.0289453	0.815082	0.9747
ENSG00000071127	WDR1	0.112488	0.349387	0.887612
ENSG00000071462	BUD23	0.226263	0.138362	0.763233
ENSG00000071537	SEL1L	-0.070474	0.656095	0.959178
ENSG00000071553	ATP6AP1	-0.181879	0.130267	0.754394
ENSG00000071564	TCF3	0.0925865	0.519213	0.934065
ENSG00000071626	DAZAP1	-0.257409	0.0431969	0.561629
ENSG00000071655	MBD3	-0.0739943	0.653525	0.959178
ENSG00000071859	FAM50A	0.075298	0.649753	0.959178
ENSG00000071889	FAM3A	-0.0818145	0.598756	0.953167
ENSG00000071894	CPSF1	-0.275178	0.15296	0.771232
ENSG00000071967	CYBRD1	-0.288095	0.117125	0.734054
ENSG00000071994	PDCD2	4.73757e-05	0.999726	0.999726
ENSG00000072062	PRKACA	-0.0537205	0.738182	0.968933
ENSG00000072110	ACTN1	-0.203228	0.157228	0.775602
ENSG00000072135	PTPN18	-0.159985	0.240885	0.842801
ENSG00000072274	TFRC	-0.167263	0.204687	0.819058
ENSG00000169710	FASN	-0.548112	3.05442e-05	0.0100681
ENSG00000072364	AFF4	0.200453	0.318915	0.885655
ENSG00000072501	SMC1A	0.194882	0.263573	0.850717
ENSG00000072506	HSD17B10	-0.031579	0.829069	0.97834
ENSG00000072518	MARK2	0.00558862	0.968299	0.996323
ENSG00000072609	CHFR	0.0054727	0.968811	0.996323
ENSG00000072736	NFATC3	0.00224314	0.98811	0.997455
ENSG00000072778	ACADVL	-0.045044	0.771854	0.970797
ENSG00000072786	STK10	-0.161278	0.200576	0.816248
ENSG00000072803	FBXW11	0.024576	0.878488	0.986233
ENSG00000072818	ACAP1	-0.151183	0.363063	0.890187
ENSG00000258504	AL157871.1	-0.533001	0.0058336	0.242255
ENSG00000072864	NDE1	-0.00293392	0.983305	0.996532
ENSG00000072958	AP1M1	-0.0635732	0.593058	0.949317
ENSG00000073060	SCARB1	-0.0665456	0.623149	0.958421
ENSG00000073111	MCM2	-0.13165	0.396911	0.898604
ENSG00000073169	SELENOO	-0.107239	0.581072	0.946972
ENSG00000073578	SDHA	-0.0934751	0.49419	0.932134
ENSG00000073584	SMARCE1	0.0478083	0.764593	0.970797
ENSG00000073614	KDM5A	0.298983	0.0574326	0.596259
ENSG00000073756	PTGS2	0.144678	0.334696	0.886576
ENSG00000073792	IGF2BP2	-0.0162501	0.897307	0.988374
ENSG00000073849	ST6GAL1	0.0251197	0.901993	0.989696
ENSG00000073910	FRY	-0.00978594	0.945915	0.994746
ENSG00000073921	PICALM	0.171426	0.206089	0.820016
ENSG00000074054	CLASP1	-0.0254454	0.881874	0.988134
ENSG00000074071	MRPS34	-0.00749833	0.963586	0.995514
ENSG00000074181	NOTCH3	0.41335	0.443903	0.914139
ENSG00000074201	CLNS1A	0.125902	0.311926	0.881616
ENSG00000074319	TSG101	0.212294	0.226355	0.836413
ENSG00000074356	NCBP3	-0.0362469	0.79137	0.97152
ENSG00000074370	ATP2A3	-0.182247	0.0959251	0.702701
ENSG00000074416	MGLL	-0.218506	0.221987	0.835262
ENSG00000074660	SCARF1	0.250382	0.160549	0.776582
ENSG00000074695	LMAN1	-0.108925	0.491607	0.931983
ENSG00000074696	HACD3	-0.0361101	0.828797	0.97834
ENSG00000074755	ZZEF1	-0.144464	0.297802	0.880385
ENSG00000074800	ENO1	-0.119511	0.360016	0.888263
ENSG00000074842	MYDGF	0.0189677	0.909808	0.991595
ENSG00000075142	SRI	0.122629	0.382981	0.898604
ENSG00000075151	EIF4G3	-0.0399517	0.795603	0.971551
ENSG00000075234	TTC38	0.103665	0.511802	0.932134
ENSG00000075240	GRAMD4	-0.221034	0.0609246	0.605423
ENSG00000075292	ZNF638	-0.332508	0.0454467	0.568909
ENSG00000075399	VPS9D1	0.0798123	0.703322	0.963768
ENSG00000075413	MARK3	-0.00447944	0.976129	0.996323
ENSG00000075415	SLC25A3	-0.00413509	0.969015	0.996323
ENSG00000075420	FNDC3B	0.0523284	0.6943	0.961985
ENSG00000075426	FOSL2	0.0380624	0.828076	0.97834
ENSG00000075539	FRYL	-0.17	0.414498	0.904464
ENSG00000088325	TPX2	-0.532667	0.00275728	0.183307
ENSG00000075618	FSCN1	-0.121968	0.329989	0.886576
ENSG00000075624	ACTB	-0.154543	0.291716	0.875149
ENSG00000075651	PLD1	-0.124913	0.481007	0.929611
ENSG00000075785	RAB7A	-0.0775281	0.56137	0.943739
ENSG00000075790	BCAP29	0.173619	0.309563	0.881616
ENSG00000075856	SART3	0.16821	0.259476	0.850717
ENSG00000075884	ARHGAP15	-0.0982227	0.463328	0.921463
ENSG00000076003	MCM6	-0.0568528	0.768009	0.970797
ENSG00000076067	RBMS2	0.014145	0.933341	0.992661
ENSG00000076108	BAZ2A	-0.224918	0.113523	0.731504
ENSG00000076201	PTPN23	-0.132348	0.42059	0.905384
ENSG00000168010	ATG16L2	-0.520965	0.0149355	0.384222
ENSG00000076248	UNG	-0.218341	0.153974	0.771248
ENSG00000076513	ANKRD13A	-0.0239155	0.870771	0.984971
ENSG00000076641	PAG1	0.210827	0.224885	0.835262
ENSG00000076662	ICAM3	-0.0271589	0.811532	0.9747
ENSG00000076685	NT5C2	-0.210188	0.109668	0.726075
ENSG00000076924	XAB2	-0.0362636	0.784741	0.970797
ENSG00000255587	RAB44	-0.508604	0.00657812	0.261632
ENSG00000076944	STXBP2	0.0412584	0.80369	0.973063
ENSG00000076984	MAP2K7	-0.0996643	0.492949	0.932134
ENSG00000077044	DGKD	-0.110852	0.512598	0.932134
ENSG00000077097	TOP2B	0.154372	0.255276	0.850717
ENSG00000077147	TM9SF3	0.0552614	0.702256	0.963501
ENSG00000077150	NFKB2	-0.181508	0.272349	0.858896
ENSG00000077232	DNAJC10	0.107515	0.499705	0.932134
ENSG00000077235	GTF3C1	-0.096621	0.473498	0.927539
ENSG00000077238	IL4R	-0.0318928	0.782586	0.970797
ENSG00000077312	SNRPA	-0.301998	0.0691903	0.63639
ENSG00000077380	DYNC1I2	0.0935401	0.625629	0.958421
ENSG00000077420	APBB1IP	-0.0787184	0.57141	0.945853
ENSG00000077549	CAPZB	-0.0403589	0.754129	0.970797
ENSG00000077721	UBE2A	0.0996385	0.441828	0.913911
ENSG00000077984	CST7	0.0250013	0.812837	0.9747
ENSG00000078061	ARAF	0.186012	0.151641	0.770007
ENSG00000078140	UBE2K	-0.0357756	0.819632	0.977112
ENSG00000051108	HERPUD1	-0.495761	0.00455163	0.213187
ENSG00000078369	GNB1	0.0451705	0.694483	0.961985
ENSG00000078399	HOXA9	-0.0786826	0.6581	0.959178
ENSG00000078618	NRDC	0.00915069	0.942151	0.993979
ENSG00000078668	VDAC3	-0.209458	0.0685826	0.633458
ENSG00000078674	PCM1	0.0569602	0.685604	0.960997
ENSG00000078747	ITCH	0.233511	0.232502	0.836413
ENSG00000078808	SDF4	-0.192258	0.116464	0.734054
ENSG00000078902	TOLLIP	0.00468338	0.975676	0.996323
ENSG00000079246	XRCC5	0.0350225	0.803389	0.972922
ENSG00000079277	MKNK1	-0.119411	0.491019	0.931983
ENSG00000079313	REXO1	-0.0249785	0.859303	0.98479
ENSG00000079332	SAR1A	-0.0745886	0.539613	0.938165
ENSG00000079432	CIC	-0.0986787	0.521958	0.934191
ENSG00000079459	FDFT1	-0.132299	0.279959	0.865299
ENSG00000079616	KIF22	-0.237125	0.114628	0.731504
ENSG00000079739	PGM1	-0.217907	0.179263	0.79479
ENSG00000079785	DDX1	0.0771059	0.604301	0.955804
ENSG00000079805	DNM2	0.0174702	0.87227	0.985165
ENSG00000079999	KEAP1	0.108561	0.382667	0.898604
ENSG00000080189	SLC35C2	-0.198185	0.159998	0.776582
ENSG00000080345	RIF1	0.109297	0.532057	0.936797
ENSG00000080371	RAB21	0.00452845	0.976508	0.996323
ENSG00000080503	SMARCA2	-0.0386189	0.782785	0.970797
ENSG00000080546	SESN1	-0.238895	0.0790877	0.676027
ENSG00000080815	PSEN1	-0.117469	0.451033	0.91669
ENSG00000080822	CLDND1	-0.12363	0.479924	0.929611
ENSG00000080824	HSP90AA1	0.103265	0.495988	0.932134
ENSG00000080845	DLGAP4	0.169053	0.204384	0.819058
ENSG00000081087	OSTM1	0.268151	0.148232	0.770007
ENSG00000186480	INSIG1	-0.4954	0.000813425	0.102143
ENSG00000081181	ARG2	-0.0592317	0.732644	0.967647
ENSG00000081237	PTPRC	0.250577	0.44847	0.915691
ENSG00000081320	STK17B	0.174898	0.322309	0.886576
ENSG00000081791	KIAA0141	-0.166513	0.198603	0.813631
ENSG00000081913	PHLPP1	0.222876	0.194946	0.80942
ENSG00000082014	SMARCD3	-0.109129	0.519388	0.934065
ENSG00000082074	FYB1	-0.0473603	0.768222	0.970797
ENSG00000082153	BZW1	0.204144	0.146735	0.770007
ENSG00000082212	ME2	-0.127299	0.404508	0.900737
ENSG00000082641	NFE2L1	-0.0291309	0.820971	0.977823
ENSG00000082701	GSK3B	0.295758	0.121799	0.741827
ENSG00000082898	XPO1	-0.0793655	0.594178	0.949317
ENSG00000082996	RNF13	0.43107	0.0330022	0.507006
ENSG00000083312	TNPO1	-0.00590078	0.970568	0.996323
ENSG00000083444	PLOD1	-0.189873	0.135677	0.757206
ENSG00000083457	ITGAE	-0.0357057	0.790663	0.97152
ENSG00000083520	DIS3	-0.0718833	0.658588	0.959178
ENSG00000140474	ULK3	-0.495394	0.0172786	0.405011
ENSG00000083845	RPS5	0.111419	0.410921	0.90411
ENSG00000083896	YTHDC1	-0.21855	0.146396	0.769785
ENSG00000084070	SMAP2	0.0382519	0.782757	0.970797
ENSG00000084073	ZMPSTE24	0.319593	0.0437158	0.562509
ENSG00000084090	STARD7	0.0184535	0.884986	0.9883
ENSG00000084092	NOA1	0.0197124	0.931184	0.992661
ENSG00000084093	REST	-0.0558385	0.741912	0.970797
ENSG00000084112	SSH1	-0.148783	0.446533	0.914139
ENSG00000084207	GSTP1	-0.160682	0.285687	0.870653
ENSG00000084234	APLP2	-0.00966841	0.955786	0.994897
ENSG00000084463	WBP11	0.0367277	0.792769	0.97152
ENSG00000084623	EIF3I	0.237591	0.059415	0.603767
ENSG00000084652	TXLNA	-0.248833	0.0542332	0.587322
ENSG00000084676	NCOA1	0.157425	0.352227	0.887612
ENSG00000084693	AGBL5	0.0386407	0.780039	0.970797
ENSG00000084733	RAB10	0.0512962	0.737092	0.968531
ENSG00000084754	HADHA	0.00607686	0.953857	0.994746
ENSG00000084774	CAD	-0.198082	0.141811	0.764187
ENSG00000085063	CD59	-0.210768	0.111474	0.726749
ENSG00000085117	CD82	-0.0525956	0.683969	0.960812
ENSG00000085377	PREP	-0.129828	0.41885	0.905077
ENSG00000085415	SEH1L	-0.0919369	0.552963	0.941634
ENSG00000085449	WDFY1	0.113159	0.462621	0.921463
ENSG00000085514	PILRA	0.342025	0.0566107	0.595243
ENSG00000085721	RRN3	0.0283293	0.85925	0.98479
ENSG00000085832	EPS15	0.0602127	0.730946	0.967647
ENSG00000085871	MGST2	-0.185187	0.384871	0.898604
ENSG00000085872	CHERP	0.0802796	0.55687	0.942907
ENSG00000086061	DNAJA1	0.0164452	0.915993	0.992233
ENSG00000086062	B4GALT1	0.0505129	0.735642	0.9682
ENSG00000086065	CHMP5	0.198143	0.239993	0.841434
ENSG00000086232	EIF2AK1	-0.0561692	0.640864	0.959178
ENSG00000086300	SNX10	0.131168	0.519591	0.934065
ENSG00000086475	SEPHS1	0.0624585	0.675028	0.960599
ENSG00000086504	MRPL28	0.141172	0.404175	0.900737
ENSG00000086589	RBM22	-0.0601001	0.639302	0.959178
ENSG00000086598	TMED2	0.112306	0.330476	0.886576
ENSG00000086666	ZFAND6	-0.0286197	0.846999	0.980883
ENSG00000086730	LAT2	0.0649166	0.579798	0.946972
ENSG00000086758	HUWE1	-0.152646	0.330324	0.886576
ENSG00000087074	PPP1R15A	0.259135	0.0527854	0.582406
ENSG00000087086	FTL	0.141507	0.357309	0.887612
ENSG00000087087	SRRT	-0.150694	0.311555	0.881616
ENSG00000087088	BAX	0.103867	0.458828	0.921058
ENSG00000087095	NLK	0.0797347	0.605162	0.955863
ENSG00000005381	MPO	-0.493353	0.00310733	0.185867
ENSG00000087152	ATXN7L3	-0.110684	0.391562	0.898604
ENSG00000087157	PGS1	0.0717151	0.696404	0.961985
ENSG00000087191	PSMC5	0.0838768	0.62391	0.958421
ENSG00000087206	UIMC1	-0.141189	0.306988	0.881616
ENSG00000087245	MMP2	0.361307	0.0631738	0.614314
ENSG00000087253	LPCAT2	-0.147073	0.370398	0.896581
ENSG00000087263	OGFOD1	0.0539172	0.696925	0.961985
ENSG00000087266	SH3BP2	-0.175283	0.329107	0.886576
ENSG00000087269	NOP14	-0.0223317	0.884537	0.9883
ENSG00000087274	ADD1	-0.224402	0.0372272	0.528867
ENSG00000087302	RTRAF	0.295796	0.0315024	0.503772
ENSG00000087338	GMCL1	-0.0818547	0.621763	0.958421
ENSG00000087365	SF3B2	0.202742	0.109936	0.726075
ENSG00000087460	GNAS	-0.00187753	0.986902	0.997455
ENSG00000087470	DNM1L	-0.168621	0.222394	0.835262
ENSG00000143382	ADAMTSL4	-0.493307	0.00370384	0.197314
ENSG00000088205	DDX18	0.059173	0.654049	0.959178
ENSG00000088247	KHSRP	-0.130362	0.281486	0.866137
ENSG00000088298	EDEM2	0.0890336	0.571604	0.945853
ENSG00000280160	AC135050.7	-0.491327	0.000990956	0.111651
ENSG00000088448	ANKRD10	-0.267685	0.133027	0.754394
ENSG00000088766	CRLS1	0.03422	0.836595	0.980341
ENSG00000088826	SMOX	0.215594	0.0834171	0.681839
ENSG00000088832	FKBP1A	-0.200075	0.155442	0.773399
ENSG00000088833	NSFL1C	0.110173	0.395414	0.898604
ENSG00000088882	CPXM1	-0.306339	0.0544378	0.58833
ENSG00000088888	MAVS	-0.198046	0.0832152	0.681839
ENSG00000088930	XRN2	0.109005	0.539191	0.938165
ENSG00000088986	DYNLL1	0.0332526	0.846425	0.980883
ENSG00000088992	TESC	-0.205147	0.193685	0.80695
ENSG00000089006	SNX5	-0.12036	0.396066	0.898604
ENSG00000089009	RPL6	0.0918863	0.440622	0.913911
ENSG00000089053	ANAPC5	-0.223409	0.116989	0.734054
ENSG00000089060	SLC8B1	-0.0988164	0.500084	0.932134
ENSG00000089063	TMEM230	0.11194	0.402733	0.899312
ENSG00000089094	KDM2B	-0.0427716	0.798466	0.971551
ENSG00000089154	GCN1	-0.196237	0.113234	0.731504
ENSG00000089157	RPLP0	0.0270304	0.832535	0.97834
ENSG00000089159	PXN	-0.091855	0.469299	0.92648
ENSG00000089220	PEBP1	-0.129024	0.331476	0.886576
ENSG00000161267	BDH1	-0.489835	0.00500761	0.227674
ENSG00000089280	FUS	-0.258642	0.0527062	0.582406
ENSG00000089289	IGBP1	0.117172	0.39456	0.898604
ENSG00000089327	FXYD5	0.0387563	0.785884	0.970797
ENSG00000100823	APEX1	-0.489232	0.00010849	0.0248772
ENSG00000089486	CDIP1	-0.115969	0.486484	0.931192
ENSG00000089597	GANAB	0.109631	0.438645	0.913911
ENSG00000089639	GMIP	-0.168779	0.182347	0.79479
ENSG00000089685	BIRC5	-0.404781	0.345411	0.887612
ENSG00000089693	MLF2	0.0631361	0.645037	0.959178
ENSG00000089737	DDX24	0.0721487	0.646845	0.959178
ENSG00000089818	NECAP1	0.0985465	0.545924	0.939841
ENSG00000089820	ARHGAP4	-0.0987215	0.558531	0.942907
ENSG00000089902	RCOR1	0.160064	0.346417	0.887612
ENSG00000089916	GPATCH2L	-0.198052	0.269424	0.855699
ENSG00000090013	BLVRB	-0.168127	0.29725	0.879982
ENSG00000090060	PAPOLA	0.195715	0.111241	0.726749
ENSG00000090061	CCNK	0.194235	0.192953	0.80695
ENSG00000090238	YPEL3	-0.0856764	0.580506	0.946972
ENSG00000090266	NDUFB2	0.0127272	0.931698	0.992661
ENSG00000090273	NUDC	0.0480892	0.758582	0.970797
ENSG00000090316	MAEA	0.0365751	0.782176	0.970797
ENSG00000090339	ICAM1	0.162577	0.352199	0.887612
ENSG00000090372	STRN4	-0.209111	0.124136	0.742917
ENSG00000090376	IRAK3	0.0649021	0.712259	0.965851
ENSG00000090382	LYZ	0.178809	0.286896	0.870653
ENSG00000090432	MUL1	0.222334	0.132509	0.754394
ENSG00000090487	SPG21	0.0327154	0.807187	0.974379
ENSG00000090581	GNPTG	-0.177247	0.182734	0.795244
ENSG00000090615	GOLGA3	-0.117515	0.438108	0.913911
ENSG00000090621	PABPC4	-0.269938	0.034801	0.516288
ENSG00000090674	MCOLN1	0.182112	0.201028	0.816248
ENSG00000090686	USP48	-0.117102	0.427066	0.907332
ENSG00000090857	PDPR	-0.204844	0.263125	0.850717
ENSG00000090861	AARS	-0.251979	0.133545	0.754394
ENSG00000090863	GLG1	-0.176406	0.221645	0.835262
ENSG00000090971	NAT14	0.0682212	0.753019	0.970797
ENSG00000091039	OSBPL8	0.324868	0.0426758	0.561242
ENSG00000091140	DLD	0.0709093	0.616924	0.956945
ENSG00000091164	TXNL1	-0.0180153	0.896546	0.988374
ENSG00000091317	CMTM6	0.26196	0.0602305	0.605423
ENSG00000091483	FH	0.353071	0.0376043	0.528867
ENSG00000091490	SEL1L3	-0.135605	0.510213	0.932134
ENSG00000091527	CDV3	-0.139863	0.260811	0.850717
ENSG00000091542	ALKBH5	0.0763944	0.557175	0.942907
ENSG00000091640	SPAG7	0.31524	0.0461883	0.569135
ENSG00000091947	TMEM101	-0.17627	0.286568	0.870653
ENSG00000092010	PSME1	-0.033379	0.827968	0.97834
ENSG00000092067	CEBPE	-0.177732	0.366014	0.892898
ENSG00000092094	OSGEP	-0.210656	0.18983	0.804793
ENSG00000092148	HECTD1	0.0659781	0.754453	0.970797
ENSG00000092199	HNRNPC	-0.0345129	0.77783	0.970797
ENSG00000092201	SUPT16H	-0.200681	0.106538	0.721363
ENSG00000092203	TOX4	0.20108	0.0980689	0.705918
ENSG00000092330	TINF2	0.31502	0.032155	0.503772
ENSG00000092439	TRPM7	-0.0662653	0.728305	0.967647
ENSG00000092531	SNAP23	0.0291409	0.810235	0.974379
ENSG00000092820	EZR	-0.215523	0.172605	0.788836
ENSG00000092841	MYL6	-0.0768782	0.610796	0.956406
ENSG00000092847	AGO1	-0.157454	0.42158	0.905678
ENSG00000092871	RFFL	-0.0906081	0.564728	0.944776
ENSG00000092929	UNC13D	-0.116841	0.347416	0.887612
ENSG00000092931	MFSD11	-0.24165	0.134602	0.755202
ENSG00000093000	NUP50	0.0674647	0.586909	0.949317
ENSG00000093010	COMT	-0.166302	0.17903	0.79479
ENSG00000093072	ADA2	-0.105698	0.535241	0.936797
ENSG00000182979	MTA1	-0.485889	0.00119502	0.121202
ENSG00000093167	LRRFIP2	0.0532322	0.749728	0.970797
ENSG00000094631	HDAC6	-0.370097	0.0831608	0.681839
ENSG00000094914	AAAS	-0.243534	0.119288	0.738407
ENSG00000094916	CBX5	0.00641065	0.964325	0.995514
ENSG00000095015	MAP3K1	0.133879	0.493468	0.932134
ENSG00000095059	DHPS	-0.090811	0.530232	0.936797
ENSG00000095066	HOOK2	-0.11048	0.497921	0.932134
ENSG00000095139	ARCN1	-0.059913	0.678476	0.960599
ENSG00000095303	PTGS1	0.00162695	0.991661	0.997455
ENSG00000095319	NUP188	-0.131019	0.316109	0.883551
ENSG00000095370	SH2D3C	-0.110508	0.467048	0.923935
ENSG00000095380	NANS	-0.0905743	0.61571	0.956945
ENSG00000095485	CWF19L1	-0.135594	0.397847	0.898604
ENSG00000095787	WAC	0.0348595	0.763619	0.970797
ENSG00000095794	CREM	0.19349	0.241982	0.843071
ENSG00000095906	NUBP2	-0.0045324	0.979958	0.996323
ENSG00000096060	FKBP5	-0.1161	0.466211	0.923607
ENSG00000096063	SRPK1	0.0620261	0.639122	0.959178
ENSG00000136997	MYC	-0.482329	0.000474467	0.0678584
ENSG00000096384	HSP90AB1	-0.239133	0.100672	0.715847
ENSG00000096401	CDC5L	-0.027166	0.870381	0.984971
ENSG00000099194	SCD	-0.47806	0.0273809	0.475023
ENSG00000097007	ABL1	0.113538	0.523366	0.934191
ENSG00000097033	SH3GLB1	0.112192	0.419814	0.905077
ENSG00000108578	BLMH	-0.470633	0.00201374	0.158514
ENSG00000099203	TMED1	0.152039	0.327729	0.886576
ENSG00000099219	ERMP1	-0.124032	0.573611	0.946677
ENSG00000099246	RAB18	0.23762	0.0951726	0.701034
ENSG00000099290	WASHC2A	-0.00161935	0.991282	0.997455
ENSG00000099308	MAST3	-0.125714	0.496929	0.932134
ENSG00000099331	MYO9B	-0.127896	0.347243	0.887612
ENSG00000099341	PSMD8	0.119068	0.42198	0.905678
ENSG00000099364	FBXL19	0.0121322	0.92986	0.992661
ENSG00000099381	SETD1A	-0.165235	0.286467	0.870653
ENSG00000099385	BCL7C	-0.138077	0.418501	0.905077
ENSG00000099622	CIRBP	-0.277219	0.0858035	0.687732
ENSG00000099624	ATP5D	0.029626	0.85202	0.983418
ENSG00000099783	HNRNPM	-0.142632	0.285022	0.870331
ENSG00000099795	NDUFB7	0.170325	0.349307	0.887612
ENSG00000099797	TECR	0.11991	0.454506	0.919334
ENSG00000099800	TIMM13	0.0340128	0.827748	0.97834
ENSG00000099804	CDC34	-0.0488964	0.801289	0.97203
ENSG00000099817	POLR2E	-0.00617772	0.959358	0.995314
ENSG00000099821	POLRMT	-0.0852965	0.590021	0.949317
ENSG00000099860	GADD45B	-0.123014	0.532446	0.936797
ENSG00000099875	MKNK2	-0.121275	0.397771	0.898604
ENSG00000099899	TRMT2A	0.0235685	0.904119	0.989697
ENSG00000099901	RANBP1	-0.119489	0.444559	0.914139
ENSG00000099904	ZDHHC8	-0.339686	0.0645734	0.618701
ENSG00000099917	MED15	-0.10398	0.411583	0.90411
ENSG00000099940	SNAP29	-0.112555	0.509827	0.932134
ENSG00000099942	CRKL	0.041974	0.783248	0.970797
ENSG00000099949	LZTR1	-0.0144262	0.940828	0.993741
ENSG00000099956	SMARCB1	-0.0289409	0.834653	0.979955
ENSG00000099968	BCL2L13	0.152262	0.300748	0.881616
ENSG00000099974	DDTL	-0.240895	0.175336	0.789685
ENSG00000099977	DDT	-0.0744153	0.661278	0.959178
ENSG00000099985	OSM	0.161187	0.272469	0.858896
ENSG00000099991	CABIN1	-0.0633093	0.652421	0.959178
ENSG00000099995	SF3A1	0.0139739	0.925652	0.992661
ENSG00000167536	DHRS13	-0.46868	0.0185791	0.419447
ENSG00000100014	SPECC1L	-0.10318	0.57059	0.945723
ENSG00000100023	PPIL2	0.0572509	0.729378	0.967647
ENSG00000100028	SNRPD3	-0.0916976	0.505731	0.932134
ENSG00000100029	PES1	-0.208417	0.167929	0.782254
ENSG00000100030	MAPK1	0.103868	0.519345	0.934065
ENSG00000100034	PPM1F	-0.234569	0.151503	0.770007
ENSG00000100060	MFNG	-0.0386651	0.755665	0.970797
ENSG00000170791	CHCHD7	-0.462587	0.00465845	0.215515
ENSG00000100083	GGA1	0.0461495	0.733253	0.967647
ENSG00000100092	SH3BP1	-0.0695576	0.616591	0.956945
ENSG00000100097	LGALS1	0.300689	0.0595407	0.60388
ENSG00000100099	HPS4	0.376182	0.0330129	0.507006
ENSG00000100104	SRRD	0.0197548	0.895116	0.988374
ENSG00000100105	PATZ1	-0.19681	0.202381	0.817272
ENSG00000100106	TRIOBP	-0.0333571	0.82272	0.97834
ENSG00000100109	TFIP11	-0.0454449	0.743189	0.970797
ENSG00000100129	EIF3L	0.296748	0.0715809	0.645806
ENSG00000100138	SNU13	-0.00868648	0.949546	0.994746
ENSG00000100139	MICALL1	-0.0432931	0.785422	0.970797
ENSG00000100201	DDX17	-0.16129	0.231338	0.836413
ENSG00000100216	TOMM22	0.0697231	0.667872	0.959178
ENSG00000100219	XBP1	-0.0326133	0.798699	0.971551
ENSG00000100220	RTCB	0.0291404	0.847368	0.980883
ENSG00000146830	GIGYF1	-0.456679	0.0153866	0.386261
ENSG00000100225	FBXO7	0.127435	0.304028	0.881616
ENSG00000100226	GTPBP1	-0.0101721	0.931839	0.992661
ENSG00000100227	POLDIP3	0.029381	0.814093	0.9747
ENSG00000100234	TIMP3	-0.107765	0.557451	0.942907
ENSG00000100239	PPP6R2	-0.112496	0.475185	0.927539
ENSG00000100241	SBF1	-0.028485	0.830231	0.97834
ENSG00000100242	SUN2	-0.175812	0.187279	0.799763
ENSG00000100243	CYB5R3	-0.109602	0.395345	0.898604
ENSG00000100258	LMF2	-0.0949429	0.551017	0.941092
ENSG00000100266	PACSIN2	0.0857358	0.530859	0.936797
ENSG00000100280	AP1B1	-0.11087	0.323064	0.886576
ENSG00000160953	MUM1	-0.455633	0.0138433	0.377338
ENSG00000100292	HMOX1	0.0832238	0.668419	0.959178
ENSG00000100297	MCM5	-0.188413	0.159033	0.776582
ENSG00000100299	ARSA	-0.0427678	0.742899	0.970797
ENSG00000106268	NUDT1	-0.450229	0.00448229	0.213187
ENSG00000100304	TTLL12	-0.102489	0.487517	0.931192
ENSG00000100316	RPL3	0.000517709	0.996582	0.998855
ENSG00000100321	SYNGR1	0.170199	0.242778	0.843071
ENSG00000140368	PSTPIP1	-0.449452	0.00542623	0.234609
ENSG00000100325	ASCC2	0.0369861	0.804812	0.973784
ENSG00000100330	MTMR3	0.0672492	0.677852	0.960599
ENSG00000100335	MIEF1	0.137579	0.381489	0.898604
ENSG00000137193	PIM1	-0.445744	7.0793e-05	0.016971
ENSG00000100345	MYH9	-0.0170586	0.914902	0.992233
ENSG00000100347	SAMM50	0.0870163	0.577631	0.946972
ENSG00000100348	TXN2	0.0300553	0.83196	0.97834
ENSG00000100353	EIF3D	-0.00975639	0.931848	0.992661
ENSG00000100364	KIAA0930	-0.158987	0.333708	0.886576
ENSG00000100365	NCF4	-0.0182357	0.895556	0.988374
ENSG00000100368	CSF2RB	0.233063	0.137786	0.761724
ENSG00000100380	ST13	-0.0984348	0.429011	0.908267
ENSG00000159314	ARHGAP27	-0.443875	0.0257955	0.470756
ENSG00000100393	EP300	0.230711	0.335098	0.886576
ENSG00000100395	L3MBTL2	0.225356	0.127414	0.746364
ENSG00000100401	RANGAP1	-0.302808	0.0554694	0.592198
ENSG00000100403	ZC3H7B	-0.128475	0.376057	0.89696
ENSG00000100410	PHF5A	0.115964	0.4772	0.927646
ENSG00000100412	ACO2	-0.0283332	0.813331	0.9747
ENSG00000100413	POLR3H	-0.144934	0.311777	0.881616
ENSG00000100418	DESI1	-0.0827949	0.579932	0.946972
ENSG00000100422	CERK	0.0707888	0.607765	0.956406
ENSG00000100425	BRD1	-0.044258	0.80555	0.974196
ENSG00000100426	ZBED4	-0.121993	0.551114	0.941092
ENSG00000100427	MLC1	-0.147946	0.236408	0.839043
ENSG00000100439	ABHD4	0.210936	0.181085	0.79479
ENSG00000100441	KHNYN	-0.00431255	0.970747	0.996323
ENSG00000100442	FKBP3	-0.232263	0.141661	0.764187
ENSG00000100445	SDR39U1	0.0103868	0.949582	0.994746
ENSG00000100448	CTSG	-0.167577	0.186759	0.798836
ENSG00000100461	RBM23	0.0778495	0.56775	0.944911
ENSG00000100462	PRMT5	0.274899	0.103431	0.715875
ENSG00000100473	COCH	0.176343	0.38342	0.898604
ENSG00000100485	SOS2	-0.0257594	0.906744	0.990302
ENSG00000100503	NIN	0.0844517	0.551584	0.941092
ENSG00000100504	PYGL	0.0811712	0.558366	0.942907
ENSG00000100519	PSMC6	0.258505	0.137275	0.760254
ENSG00000197561	ELANE	-0.440398	0.000149538	0.032861
ENSG00000100554	ATP6V1D	0.034886	0.8144	0.9747
ENSG00000100567	PSMA3	0.115523	0.479637	0.929611
ENSG00000100568	VTI1B	0.0824711	0.576472	0.946972
ENSG00000100580	TMED8	0.0764722	0.682098	0.960599
ENSG00000100591	AHSA1	-0.074083	0.639849	0.959178
ENSG00000100596	SPTLC2	-0.208158	0.174662	0.789582
ENSG00000100599	RIN3	0.192364	0.0959117	0.702701
ENSG00000144455	SUMF1	-0.434457	0.0134203	0.37676
ENSG00000100605	ITPK1	0.0110205	0.932774	0.992661
ENSG00000100612	DHRS7	0.0303692	0.844308	0.980477
ENSG00000100614	PPM1A	0.357655	0.0331659	0.507006
ENSG00000100632	ERH	-0.00153829	0.992699	0.997615
ENSG00000100644	HIF1A	0.127352	0.501348	0.932134
ENSG00000100647	SUSD6	0.0280773	0.879042	0.986364
ENSG00000100650	SRSF5	-0.170217	0.352056	0.887612
ENSG00000100664	EIF5	-0.0331759	0.762336	0.970797
ENSG00000100697	DICER1	-0.361294	0.0319052	0.503772
ENSG00000100714	MTHFD1	-0.0581986	0.728008	0.967647
ENSG00000100726	TELO2	-0.361957	0.0516897	0.581516
ENSG00000100731	PCNX1	0.0912153	0.561563	0.943739
ENSG00000100764	PSMC1	0.229669	0.0939824	0.699449
ENSG00000100796	PPP4R3A	0.226703	0.0979963	0.705918
ENSG00000100804	PSMB5	-0.0265261	0.839473	0.980477
ENSG00000100811	YY1	0.194895	0.104828	0.720716
ENSG00000100813	ACIN1	-0.230989	0.110137	0.726075
ENSG00000117632	STMN1	-0.434145	0.0191112	0.421725
ENSG00000100836	PABPN1	-0.00251809	0.988472	0.997455
ENSG00000100865	CINP	0.143885	0.340161	0.887612
ENSG00000100883	SRP54	-0.0939329	0.610583	0.956406
ENSG00000100888	CHD8	-0.0402121	0.815875	0.9747
ENSG00000100897	DCAF11	0.0522334	0.659367	0.959178
ENSG00000100906	NFKBIA	0.175628	0.225197	0.835262
ENSG00000100911	PSME2	0.0257778	0.888855	0.988374
ENSG00000100938	GMPR2	-0.204745	0.10936	0.726075
ENSG00000100941	PNN	-0.157784	0.467493	0.924469
ENSG00000166012	TAF1D	-0.432384	0.0174214	0.406104
ENSG00000100982	PCIF1	0.213811	0.0947293	0.699723
ENSG00000100983	GSS	-0.110233	0.461687	0.921463
ENSG00000100991	TRPC4AP	-0.148906	0.269253	0.855699
ENSG00000100994	PYGB	-0.0321703	0.830315	0.97834
ENSG00000100997	ABHD12	-0.0656505	0.68052	0.960599
ENSG00000101040	ZMYND8	-0.213683	0.146548	0.769815
ENSG00000101057	MYBL2	-0.0017804	0.99625	0.998855
ENSG00000101082	SLA2	0.0854696	0.562056	0.943739
ENSG00000101109	STK4	0.241165	0.126644	0.744608
ENSG00000101126	ADNP	-0.200275	0.150316	0.770007
ENSG00000101150	TPD52L2	0.043633	0.728122	0.967647
ENSG00000101152	DNAJC5	0.0354762	0.761341	0.970797
ENSG00000101158	NELFCD	0.0139335	0.924222	0.992661
ENSG00000101160	CTSZ	-0.0750559	0.565885	0.944911
ENSG00000101161	PRPF6	-0.10156	0.424538	0.906786
ENSG00000101166	PRELID3B	0.277523	0.0683056	0.633118
ENSG00000101182	PSMA7	0.248728	0.0804281	0.677494
ENSG00000101189	MRGBP	-0.102138	0.554961	0.942645
ENSG00000101191	DIDO1	-0.0596114	0.707991	0.964371
ENSG00000101193	GID8	0.0708834	0.591055	0.949317
ENSG00000160299	PCNT	-0.43156	0.00456771	0.213187
ENSG00000101199	ARFGAP1	-0.118438	0.523906	0.934191
ENSG00000101216	GMEB2	0.212753	0.177527	0.794168
ENSG00000101220	C20orf27	-0.300469	0.137363	0.760254
ENSG00000167978	SRRM2	-0.426107	0.0132706	0.376285
ENSG00000101236	RNF24	0.025574	0.871421	0.984971
ENSG00000101246	ARFRP1	-0.0680222	0.699569	0.963177
ENSG00000101255	TRIB3	-0.14506	0.396478	0.898604
ENSG00000101265	RASSF2	0.135343	0.401101	0.898604
ENSG00000101266	CSNK2A1	-0.0209636	0.885139	0.9883
ENSG00000101290	CDS2	0.0385202	0.789453	0.97152
ENSG00000101294	HM13	-0.0608517	0.697155	0.961985
ENSG00000101307	SIRPB1	0.194532	0.289898	0.872595
ENSG00000101310	SEC23B	0.311147	0.0446381	0.565916
ENSG00000101335	MYL9	0.260886	0.196083	0.80942
ENSG00000101336	HCK	-0.185003	0.143363	0.764504
ENSG00000101337	TM9SF4	0.0416586	0.790014	0.97152
ENSG00000101346	POFUT1	-0.215678	0.167885	0.782254
ENSG00000101347	SAMHD1	0.139101	0.432095	0.909974
ENSG00000101361	NOP56	-0.0852423	0.666139	0.959178
ENSG00000101365	IDH3B	0.178031	0.277498	0.863423
ENSG00000101367	MAPRE1	0.155963	0.223675	0.835262
ENSG00000101384	JAG1	-0.323867	0.0632485	0.614314
ENSG00000101421	CHMP4B	-0.0260571	0.844131	0.980477
ENSG00000101439	CST3	0.175377	0.266433	0.853685
ENSG00000101444	AHCY	-0.0212784	0.875609	0.985928
ENSG00000101445	PPP1R16B	0.242989	0.237035	0.839862
ENSG00000101457	DNTTIP1	0.0066509	0.968408	0.996323
ENSG00000221869	CEBPD	-0.423108	0.000457702	0.0678584
ENSG00000101493	ZNF516	0.0352853	0.843228	0.980477
ENSG00000101557	USP14	0.0579717	0.710437	0.964687
ENSG00000101558	VAPA	0.105257	0.401389	0.898604
ENSG00000101577	LPIN2	0.132362	0.360035	0.888263
ENSG00000101596	SMCHD1	-0.0335554	0.841458	0.980477
ENSG00000101608	MYL12A	0.0270379	0.845178	0.980883
ENSG00000101695	RNF125	0.33796	0.0474879	0.570044
ENSG00000101745	ANKRD12	-0.0190516	0.924525	0.992661
ENSG00000101773	RBBP8	0.218501	0.185073	0.795498
ENSG00000101782	RIOK3	-0.0820361	0.553373	0.941634
ENSG00000101849	TBL1X	-0.0603913	0.752073	0.970797
ENSG00000101940	WDR13	0.14795	0.408662	0.902227
ENSG00000101966	XIAP	-0.274332	0.101282	0.715847
ENSG00000101972	STAG2	0.141719	0.382519	0.898604
ENSG00000101997	CCDC22	0.00984114	0.954629	0.994746
ENSG00000102007	PLP2	-0.0217058	0.874364	0.985698
ENSG00000102032	RENBP	-0.0342747	0.838683	0.980477
ENSG00000102034	ELF4	-0.0186274	0.912692	0.992233
ENSG00000102054	RBBP7	0.0339158	0.766746	0.970797
ENSG00000102096	PIM2	0.0940379	0.470747	0.927162
ENSG00000102103	PQBP1	-0.189735	0.228693	0.836413
ENSG00000102119	EMD	-0.042794	0.78456	0.970797
ENSG00000102125	TAZ	-0.198124	0.365201	0.892524
ENSG00000102144	PGK1	-0.171027	0.147878	0.770007
ENSG00000102158	MAGT1	0.315635	0.0627182	0.614314
ENSG00000102172	SMS	0.0320709	0.820049	0.977387
ENSG00000102178	UBL4A	0.12736	0.338228	0.887612
ENSG00000102181	CD99L2	0.0992403	0.41846	0.905077
ENSG00000102218	RP2	0.132019	0.484244	0.929923
ENSG00000102225	CDK16	-0.13875	0.417285	0.905077
ENSG00000102226	USP11	-0.0789526	0.579186	0.946972
ENSG00000102241	HTATSF1	-0.146322	0.264754	0.851827
ENSG00000102265	TIMP1	0.027792	0.885985	0.9883
ENSG00000102316	MAGED2	-0.077535	0.628936	0.959178
ENSG00000102317	RBM3	-0.171307	0.193516	0.80695
ENSG00000102393	GLA	-0.0346405	0.827463	0.97834
ENSG00000102531	FNDC3A	0.0575787	0.795221	0.971551
ENSG00000102572	STK24	0.0374276	0.784013	0.970797
ENSG00000102580	DNAJC3	0.0124209	0.933423	0.992661
ENSG00000102606	ARHGEF7	-0.14122	0.367497	0.892898
ENSG00000102699	PARP4	-0.112038	0.629645	0.959178
ENSG00000102753	KPNA3	0.143114	0.372572	0.896832
ENSG00000102760	RGCC	-0.0172368	0.9171	0.992233
ENSG00000102786	INTS6	0.0118518	0.944203	0.994746
ENSG00000102858	MGRN1	0.0403657	0.762643	0.970797
ENSG00000102870	ZNF629	0.159562	0.314102	0.883272
ENSG00000102879	CORO1A	-0.137977	0.255099	0.850717
ENSG00000102882	MAPK3	-0.0748802	0.625486	0.958421
ENSG00000102893	PHKB	0.0392289	0.766296	0.970797
ENSG00000102897	LYRM1	-0.0661653	0.617865	0.957291
ENSG00000102898	NUTF2	0.069015	0.621875	0.958421
ENSG00000102900	NUP93	-0.101274	0.510346	0.932134
ENSG00000102901	CENPT	-0.227497	0.357302	0.887612
ENSG00000102910	LONP2	0.0660175	0.652791	0.959178
ENSG00000102921	N4BP1	0.136141	0.444946	0.914139
ENSG00000102931	ARL2BP	-0.0443365	0.775806	0.970797
ENSG00000102934	PLLP	0.143324	0.362827	0.890187
ENSG00000102974	CTCF	0.0116028	0.931081	0.992661
ENSG00000102978	POLR2C	0.0296141	0.842057	0.980477
ENSG00000102996	MMP15	-0.138873	0.389488	0.898604
ENSG00000103005	USB1	0.00212387	0.988071	0.997455
ENSG00000124357	NAGK	-0.422966	0.00247535	0.178836
ENSG00000103024	NME3	-0.296004	0.0917895	0.699449
ENSG00000103035	PSMD7	-0.0924365	0.515993	0.932836
ENSG00000103037	SETD6	-0.177677	0.316128	0.883551
ENSG00000103043	VAC14	0.128723	0.406175	0.900737
ENSG00000103044	HAS3	-0.130669	0.397768	0.898604
ENSG00000103051	COG4	0.0755919	0.640589	0.959178
ENSG00000103061	SLC7A6OS	-0.0728993	0.660738	0.959178
ENSG00000103064	SLC7A6	-0.150907	0.252294	0.847364
ENSG00000103066	PLA2G15	-0.021499	0.887471	0.988374
ENSG00000103091	WDR59	-0.0447354	0.801547	0.97203
ENSG00000103111	MON1B	0.160936	0.295082	0.878234
ENSG00000103126	AXIN1	0.0519826	0.699802	0.963177
ENSG00000103148	NPRL3	0.101092	0.429162	0.908267
ENSG00000103152	MPG	0.202878	0.157624	0.775602
ENSG00000103168	TAF1C	-0.516131	0.0325198	0.503772
ENSG00000103174	NAGPA	-0.280691	0.0733995	0.657473
ENSG00000103187	COTL1	0.0122647	0.922619	0.992661
ENSG00000103194	USP10	0.210517	0.146953	0.770007
ENSG00000103197	TSC2	-0.269709	0.0962278	0.70277
ENSG00000103202	NME4	-0.129727	0.358115	0.887612
ENSG00000103222	ABCC1	-0.00808256	0.959147	0.995314
ENSG00000103245	NARFL	-0.0824685	0.610911	0.956406
ENSG00000103249	CLCN7	0.00340993	0.980356	0.996323
ENSG00000103253	HAGHL	-0.263095	0.247947	0.847217
ENSG00000103254	FAM173A	-0.0382479	0.868996	0.984971
ENSG00000103257	SLC7A5	0.166369	0.224923	0.835262
ENSG00000103260	METRN	-0.196827	0.31085	0.881616
ENSG00000103266	STUB1	-0.0454847	0.778903	0.970797
ENSG00000103275	UBE2I	-0.0127027	0.916862	0.992233
ENSG00000103319	EEF2K	-0.100094	0.508312	0.932134
ENSG00000103326	CAPN15	-0.202859	0.131039	0.754394
ENSG00000103335	PIEZO1	-0.260262	0.0380843	0.531366
ENSG00000103342	GSPT1	-0.122499	0.395112	0.898604
ENSG00000103353	UBFD1	0.0120595	0.936188	0.993521
ENSG00000103363	ELOB	0.270943	0.124848	0.742917
ENSG00000145287	PLAC8	-0.421537	0.00600213	0.247306
ENSG00000103381	CPPED1	0.228277	0.182012	0.79479
ENSG00000103423	DNAJA3	0.17244	0.232723	0.836413
ENSG00000103429	BFAR	0.24983	0.0930897	0.699449
ENSG00000103479	RBL2	0.0561419	0.80149	0.97203
ENSG00000103485	QPRT	0.120309	0.511947	0.932134
ENSG00000103489	XYLT1	-0.0636126	0.78755	0.970797
ENSG00000103490	PYCARD	0.247746	0.0833293	0.681839
ENSG00000103495	MAZ	-0.0696541	0.532345	0.936797
ENSG00000103496	STX4	0.162075	0.270333	0.855699
ENSG00000103502	CDIPT	-0.0513246	0.691191	0.961985
ENSG00000103507	BCKDK	-0.006383	0.964392	0.995514
ENSG00000103510	KAT8	0.148289	0.310115	0.881616
ENSG00000143442	POGZ	-0.421142	0.00957247	0.324223
ENSG00000103544	C16orf62	0.177508	0.207201	0.820277
ENSG00000103549	RNF40	0.153041	0.171073	0.78838
ENSG00000103591	AAGAB	0.18781	0.178776	0.79479
ENSG00000103642	LACTB	0.150355	0.384769	0.898604
ENSG00000103653	CSK	-0.0996052	0.41219	0.904256
ENSG00000103657	HERC1	-0.0265944	0.862899	0.984971
ENSG00000103769	RAB11A	-0.0412554	0.761161	0.970797
ENSG00000103855	CD276	0.23078	0.259098	0.850717
ENSG00000198951	NAGA	-0.418545	0.00788756	0.284925
ENSG00000103978	TMEM87A	0.0323056	0.830158	0.97834
ENSG00000103994	ZNF106	0.00561474	0.973428	0.996323
ENSG00000104043	ATP8B4	0.00250245	0.983541	0.99658
ENSG00000104064	GABPB1	-0.023714	0.877012	0.985928
ENSG00000104093	DMXL2	-0.0524628	0.777671	0.970797
ENSG00000104131	EIF3J	-0.0669178	0.642704	0.959178
ENSG00000104133	SPG11	0.0889289	0.652015	0.959178
ENSG00000104142	VPS18	-0.135962	0.372082	0.896832
ENSG00000104164	BLOC1S6	0.175753	0.224917	0.835262
ENSG00000104219	ZDHHC2	0.0113418	0.947796	0.994746
ENSG00000104320	NBN	0.171547	0.232325	0.836413
ENSG00000104331	IMPAD1	-0.1656	0.320106	0.885655
ENSG00000104341	LAPTM4B	-0.0782465	0.591768	0.949317
ENSG00000104365	IKBKB	-0.229003	0.223058	0.835262
ENSG00000104388	RAB2A	0.123374	0.330352	0.886576
ENSG00000104408	EIF3E	0.212324	0.093581	0.699449
ENSG00000104419	NDRG1	-0.0436797	0.718141	0.967647
ENSG00000104472	CHRAC1	-0.111373	0.539995	0.938165
ENSG00000104517	UBR5	-0.0499342	0.77183	0.970797
ENSG00000104518	GSDMD	-0.145688	0.430317	0.909974
ENSG00000104522	TSTA3	0.0360043	0.846691	0.980883
ENSG00000104529	EEF1D	0.0573781	0.667567	0.959178
ENSG00000104613	INTS10	-0.22616	0.102005	0.715847
ENSG00000104626	ERI1	-0.0095398	0.950654	0.994746
ENSG00000130881	LRP3	-0.418144	0.00299726	0.183808
ENSG00000104679	R3HCC1	0.100798	0.532995	0.936797
ENSG00000104687	GSR	0.194706	0.134265	0.755202
ENSG00000104731	KLHDC4	-0.141575	0.45925	0.921058
ENSG00000104738	MCM4	-0.0375815	0.823969	0.97834
ENSG00000104763	ASAH1	0.0709373	0.659974	0.959178
ENSG00000104765	BNIP3L	0.0173041	0.904866	0.989697
ENSG00000104774	MAN2B1	-0.111431	0.417988	0.905077
ENSG00000138772	ANXA3	-0.415144	0.0289517	0.490801
ENSG00000104805	NUCB1	-0.0716532	0.552534	0.94154
ENSG00000104812	GYS1	-0.268643	0.0734853	0.657473
ENSG00000104823	ECH1	0.0897015	0.494414	0.932134
ENSG00000104824	HNRNPL	-0.0071851	0.962754	0.995514
ENSG00000104825	NFKBIB	0.231758	0.188522	0.801785
ENSG00000197119	SLC25A29	-0.408667	0.0162984	0.396262
ENSG00000104853	CLPTM1	-0.0601092	0.694234	0.961985
ENSG00000104856	RELB	0.0430784	0.7709	0.970797
ENSG00000104859	CLASRP	-0.115387	0.768512	0.970797
ENSG00000104870	FCGRT	0.0121734	0.948743	0.994746
ENSG00000104872	PIH1D1	-0.226802	0.159015	0.776582
ENSG00000104884	ERCC2	0.270698	0.127996	0.748064
ENSG00000104885	DOT1L	-0.211362	0.151877	0.770007
ENSG00000104886	PLEKHJ1	-0.12477	0.443405	0.914139
ENSG00000104889	RNASEH2A	0.090953	0.593834	0.949317
ENSG00000204386	NEU1	-0.401676	0.00144082	0.128795
ENSG00000140943	MBTPS1	-0.400919	0.00176269	0.143022
ENSG00000104903	LYL1	-0.166246	0.161219	0.777922
ENSG00000104904	OAZ1	-0.0744407	0.563705	0.944776
ENSG00000104907	TRMT1	0.0642315	0.748231	0.970797
ENSG00000104915	STX10	0.167699	0.282154	0.867306
ENSG00000104852	SNRNP70	-0.400125	0.00774182	0.283544
ENSG00000175602	CCDC85B	-0.398188	0.0269733	0.47432
ENSG00000104960	PTOV1	-0.340379	0.0397571	0.540868
ENSG00000104964	AES	-0.0095478	0.932485	0.992661
ENSG00000104969	SGTA	-0.0984504	0.500607	0.932134
ENSG00000104973	MED25	0.100205	0.501815	0.932134
ENSG00000104979	C19orf53	0.261951	0.0869561	0.690019
ENSG00000104980	TIMM44	0.163303	0.305065	0.881616
ENSG00000104998	IL27RA	0.00547128	0.972608	0.996323
ENSG00000105011	ASF1B	-0.0816865	0.729561	0.967647
ENSG00000105048	TNNT1	0.21401	0.374853	0.896832
ENSG00000105053	VRK3	0.314345	0.0401983	0.540868
ENSG00000105058	FAM32A	0.195453	0.123781	0.742917
ENSG00000105063	PPP6R1	0.0590561	0.703006	0.963768
ENSG00000105072	C19orf44	0.0537783	0.748078	0.970797
ENSG00000105122	RASAL3	-0.0385125	0.794897	0.971551
ENSG00000105127	AKAP8	-0.145669	0.388054	0.898604
ENSG00000105171	POP4	0.151597	0.394072	0.898604
ENSG00000105176	URI1	-0.0616797	0.662264	0.959178
ENSG00000105186	ANKRD27	0.14094	0.325141	0.886576
ENSG00000105193	RPS16	0.0500875	0.704113	0.964042
ENSG00000105197	TIMM50	0.175914	0.327349	0.886576
ENSG00000105202	FBL	-0.0354446	0.797647	0.971551
ENSG00000105205	CLC	-0.134081	0.441883	0.913911
ENSG00000134900	TPP2	-0.397787	0.0152288	0.386137
ENSG00000105221	AKT2	-0.251738	0.0322306	0.503772
ENSG00000105223	PLD3	0.123173	0.357643	0.887612
ENSG00000105229	PIAS4	-0.00182593	0.992159	0.997455
ENSG00000105248	CCDC94	0.0511667	0.780765	0.970797
ENSG00000105254	TBCB	0.0555394	0.720185	0.967647
ENSG00000105281	SLC1A5	-0.332144	0.0553734	0.592198
ENSG00000105287	PRKD2	-0.155536	0.33615	0.886576
ENSG00000105298	CACTIN	-0.0707221	0.710259	0.964687
ENSG00000105323	HNRNPUL1	-0.000105465	0.999413	0.999726
ENSG00000105325	FZR1	-0.205976	0.114444	0.731504
ENSG00000105329	TGFB1	0.0846642	0.463501	0.921463
ENSG00000182541	LIMK2	-0.397314	0.0129282	0.373721
ENSG00000105341	DMAC2	0.225604	0.121303	0.741827
ENSG00000105352	CEACAM4	-0.311163	0.111294	0.726749
ENSG00000105355	PLIN3	-0.0521613	0.652111	0.959178
ENSG00000105364	MRPL4	-0.143829	0.358141	0.887612
ENSG00000105372	RPS19	0.124785	0.377284	0.89696
ENSG00000105373	NOP53	0.155499	0.230013	0.836413
ENSG00000105374	NKG7	-0.127387	0.33363	0.886576
ENSG00000105383	CD33	0.18315	0.393727	0.898604
ENSG00000105397	TYK2	-0.10874	0.507791	0.932134
ENSG00000105401	CDC37	-0.155427	0.301699	0.881616
ENSG00000105402	NAPA	0.173426	0.314684	0.883551
ENSG00000105404	RABAC1	-0.103393	0.556233	0.942907
ENSG00000105429	MEGF8	0.169402	0.20459	0.819058
ENSG00000105438	KDELR1	-0.287247	0.032259	0.503772
ENSG00000105443	CYTH2	-0.111711	0.489918	0.931485
ENSG00000105447	GRWD1	0.0713366	0.67766	0.960599
ENSG00000096746	HNRNPH3	-0.397016	0.00182345	0.14571
ENSG00000105483	CARD8	-0.175844	0.242727	0.843071
ENSG00000105486	LIG1	-0.113915	0.509283	0.932134
ENSG00000105492	SIGLEC6	0.123723	0.511885	0.932134
ENSG00000105514	RAB3D	-0.0249423	0.853394	0.983566
ENSG00000105518	TMEM205	0.177314	0.271282	0.857758
ENSG00000105568	PPP2R1A	-0.0367128	0.767186	0.970797
ENSG00000105576	TNPO2	-0.305945	0.0877661	0.691723
ENSG00000105583	WDR83OS	0.0128007	0.936254	0.993521
ENSG00000105607	GCDH	-0.33262	0.0335516	0.509945
ENSG00000105612	DNASE2	-0.111496	0.475795	0.927539
ENSG00000105618	PRPF31	-0.112654	0.462227	0.921463
ENSG00000105619	TFPT	0.249116	0.139859	0.763233
ENSG00000196839	ADA	-0.395076	0.00518564	0.231582
ENSG00000105640	RPL18A	0.145056	0.294498	0.877505
ENSG00000105643	ARRDC2	-0.10314	0.474198	0.927539
ENSG00000105655	ISYNA1	-0.0437648	0.803972	0.97318
ENSG00000105656	ELL	0.214764	0.150752	0.770007
ENSG00000105669	COPE	-0.0688661	0.658644	0.959178
ENSG00000105671	DDX49	0.129066	0.410109	0.90411
ENSG00000105676	ARMC6	-0.204731	0.185688	0.796385
ENSG00000105677	TMEM147	0.332305	0.0313533	0.503772
ENSG00000105698	USF2	-0.105602	0.411597	0.90411
ENSG00000105700	KXD1	0.0472076	0.762868	0.970797
ENSG00000105701	FKBP8	-0.110741	0.47626	0.927539
ENSG00000105705	SUGP1	0.212998	0.201511	0.816683
ENSG00000105722	ERF	-0.0406663	0.80753	0.974379
ENSG00000105723	GSK3A	-0.0838199	0.567567	0.944911
ENSG00000105726	ATP13A1	-0.0294896	0.827873	0.97834
ENSG00000105737	GRIK5	-0.136988	0.35087	0.887612
ENSG00000105755	ETHE1	-0.103934	0.491615	0.931983
ENSG00000105778	AVL9	-0.0833831	0.540203	0.938165
ENSG00000105810	CDK6	-0.0775136	0.648898	0.959178
ENSG00000105819	PMPCB	-0.0439576	0.7347	0.967647
ENSG00000105821	DNAJC2	-0.00453034	0.981659	0.996323
ENSG00000105835	NAMPT	0.0943213	0.628348	0.959178
ENSG00000105849	TWISTNB	0.207913	0.252045	0.847364
ENSG00000105856	HBP1	0.0617762	0.682918	0.960599
ENSG00000105875	WDR91	0.275082	0.105096	0.720716
ENSG00000105877	DNAH11	-0.0948512	0.626039	0.958691
ENSG00000105887	MTPN	-0.0155181	0.931408	0.992661
ENSG00000105939	ZC3HAV1	-0.0847593	0.581438	0.946972
ENSG00000105953	OGDH	0.081063	0.619392	0.957407
ENSG00000105968	H2AFV	-0.146216	0.26607	0.85304
ENSG00000105993	DNAJB6	-0.103812	0.415907	0.905077
ENSG00000106003	LFNG	0.167642	0.250532	0.847364
ENSG00000106009	BRAT1	-0.189059	0.150348	0.770007
ENSG00000106028	SSBP1	-0.178064	0.257341	0.850717
ENSG00000106052	TAX1BP1	0.307123	0.0306567	0.500044
ENSG00000106070	GRB10	-0.190201	0.157902	0.776118
ENSG00000106105	GARS	-0.235822	0.177536	0.794168
ENSG00000106123	EPHB6	-0.211088	0.23129	0.836413
ENSG00000106144	CASP2	-0.249278	0.153405	0.771248
ENSG00000106153	CHCHD2	0.0044727	0.971732	0.996323
ENSG00000106211	HSPB1	0.176838	0.371656	0.896832
ENSG00000106244	PDAP1	0.0920421	0.458487	0.921058
ENSG00000106245	BUD31	0.14018	0.365432	0.892677
ENSG00000106246	PTCD1	0.213253	0.250673	0.847364
ENSG00000106261	ZKSCAN1	0.0373729	0.810405	0.974379
ENSG00000106263	EIF3B	-0.119912	0.377243	0.89696
ENSG00000106266	SNX8	-0.0279116	0.852638	0.983548
ENSG00000089351	GRAMD1A	-0.39023	0.0148232	0.384222
ENSG00000106290	TAF6	0.0644793	0.666108	0.959178
ENSG00000106305	AIMP2	-0.0423142	0.808979	0.974379
ENSG00000106348	IMPDH1	-0.137955	0.277787	0.863423
ENSG00000106355	LSM5	-0.108514	0.60316	0.955804
ENSG00000106367	AP1S1	-0.11354	0.515837	0.932836
ENSG00000106397	PLOD3	-0.194114	0.150006	0.770007
ENSG00000106400	ZNHIT1	0.218147	0.176054	0.791566
ENSG00000106546	AHR	0.277684	0.0945596	0.699449
ENSG00000106554	CHCHD3	0.224922	0.115743	0.732805
ENSG00000106609	TMEM248	-0.00187998	0.989279	0.997455
ENSG00000106615	RHEB	0.028214	0.837518	0.980477
ENSG00000106617	PRKAG2	0.007092	0.966397	0.996323
ENSG00000152127	MGAT5	-0.389822	0.0034302	0.191167
ENSG00000106628	POLD2	0.0405801	0.797873	0.971551
ENSG00000106635	BCL7B	0.0927653	0.550407	0.941092
ENSG00000106636	YKT6	-0.142824	0.24013	0.841434
ENSG00000106665	CLIP2	0.19887	0.105535	0.721281
ENSG00000106682	EIF4H	0.155098	0.179353	0.79479
ENSG00000106683	LIMK1	-0.056596	0.686011	0.961176
ENSG00000106723	SPIN1	-0.00663433	0.9717	0.996323
ENSG00000106780	MEGF9	0.372816	0.0844457	0.682032
ENSG00000106785	TRIM14	-0.239099	0.0482865	0.572277
ENSG00000106799	TGFBR1	0.0683767	0.688492	0.961628
ENSG00000106803	SEC61B	-0.142189	0.341002	0.887612
ENSG00000106829	TLE4	0.264304	0.118323	0.735889
ENSG00000106868	SUSD1	-0.0519637	0.724702	0.967647
ENSG00000106948	AKNA	0.0843337	0.516648	0.932836
ENSG00000106991	ENG	0.211893	0.120883	0.741827
ENSG00000107021	TBC1D13	0.0741644	0.514245	0.932469
ENSG00000107099	DOCK8	-0.00384659	0.981655	0.996323
ENSG00000107164	FUBP3	0.202457	0.216729	0.830127
ENSG00000107175	CREB3	0.165195	0.30061	0.881616
ENSG00000107185	RGP1	0.0728467	0.649341	0.959178
ENSG00000107223	EDF1	0.0422057	0.785384	0.970797
ENSG00000107262	BAG1	-0.0408286	0.786451	0.970797
ENSG00000107263	RAPGEF1	0.0401181	0.810242	0.974379
ENSG00000107290	SETX	-0.0467702	0.753626	0.970797
ENSG00000107331	ABCA2	-0.25261	0.188494	0.801785
ENSG00000107341	UBE2R2	-0.112284	0.405146	0.900737
ENSG00000107362	ABHD17B	0.0895474	0.625596	0.958421
ENSG00000107372	ZFAND5	-0.0236496	0.860405	0.98479
ENSG00000107438	PDLIM1	-0.139299	0.453747	0.918641
ENSG00000107521	HPS1	-0.0654161	0.547671	0.940606
ENSG00000107537	PHYH	0.292058	0.102434	0.715847
ENSG00000231925	TAPBP	-0.387173	0.00542705	0.234609
ENSG00000107581	EIF3A	-0.11367	0.43714	0.913422
ENSG00000107625	DDX50	0.100922	0.509133	0.932134
ENSG00000107651	SEC23IP	0.285538	0.0836144	0.681839
ENSG00000107738	VSIR	0.166506	0.141235	0.763872
ENSG00000107745	MICU1	-0.0411676	0.776922	0.970797
ENSG00000107758	PPP3CB	0.291925	0.034609	0.515615
ENSG00000107789	MINPP1	0.173742	0.352803	0.887612
ENSG00000107796	ACTA2	0.198688	0.30881	0.881616
ENSG00000107798	LIPA	0.108734	0.544561	0.939841
ENSG00000107816	LZTS2	-0.130303	0.32675	0.886576
ENSG00000107819	SFXN3	0.0964202	0.446701	0.914139
ENSG00000107833	NPM3	-0.0134957	0.942112	0.993979
ENSG00000107854	TNKS2	0.206105	0.232996	0.836413
ENSG00000107862	GBF1	-0.21827	0.104514	0.720533
ENSG00000107872	FBXL15	-0.200732	0.291396	0.874874
ENSG00000107874	CUEDC2	-0.18043	0.212066	0.823436
ENSG00000107929	LARP4B	-0.0678918	0.595187	0.950354
ENSG00000107937	GTPBP4	0.08029	0.545998	0.939841
ENSG00000107949	BCCIP	0.243425	0.079416	0.67606
ENSG00000107959	PITRM1	-0.167112	0.228829	0.836413
ENSG00000108010	GLRX3	0.25198	0.150487	0.770007
ENSG00000108039	XPNPEP1	0.063694	0.624874	0.958421
ENSG00000108055	SMC3	-0.0677196	0.723922	0.967647
ENSG00000165782	PIP4P1	-0.386451	0.006815	0.261632
ENSG00000108064	TFAM	0.332965	0.0468473	0.570044
ENSG00000108100	CCNY	-0.0904348	0.521733	0.934191
ENSG00000108106	UBE2S	-0.0467976	0.787803	0.970797
ENSG00000108107	RPL28	0.020833	0.896806	0.988374
ENSG00000108175	ZMIZ1	0.129222	0.491906	0.932134
ENSG00000108179	PPIF	-0.0418352	0.758622	0.970797
ENSG00000108219	TSPAN14	-0.154818	0.344392	0.887612
ENSG00000108256	NUFIP2	-0.0687921	0.655054	0.959178
ENSG00000108262	GIT1	-0.309334	0.0441373	0.563577
ENSG00000108298	RPL19	0.0439093	0.701899	0.963501
ENSG00000108306	FBXL20	0.0660156	0.670809	0.960575
ENSG00000108312	UBTF	-0.066561	0.550177	0.941092
ENSG00000108344	PSMD3	-0.0835322	0.54286	0.939841
ENSG00000108349	CASC3	0.232336	0.11768	0.735361
ENSG00000108405	P2RX1	-0.0169709	0.920377	0.992661
ENSG00000108424	KPNB1	0.158977	0.234207	0.836413
ENSG00000108448	TRIM16L	0.3112	0.0627232	0.614314
ENSG00000108468	CBX1	-0.102562	0.472244	0.927539
ENSG00000108479	GALK1	-0.0482482	0.763698	0.970797
ENSG00000108509	CAMTA2	-0.204838	0.187863	0.800964
ENSG00000108510	MED13	0.114619	0.544434	0.939841
ENSG00000108511	HOXB6	-0.0178453	0.904147	0.989697
ENSG00000108515	ENO3	-0.0288079	0.80915	0.974379
ENSG00000108518	PFN1	-0.0610427	0.620624	0.957557
ENSG00000108523	RNF167	0.0518861	0.71417	0.966667
ENSG00000108528	SLC25A11	-0.0581567	0.675844	0.960599
ENSG00000108557	RAI1	-0.159213	0.364957	0.892524
ENSG00000108559	NUP88	0.172544	0.27667	0.862897
ENSG00000108561	C1QBP	0.0446118	0.717503	0.967647
ENSG00000175727	MLXIP	-0.383262	0.012478	0.36796
ENSG00000108582	CPD	0.0703418	0.690103	0.961985
ENSG00000108587	GOSR1	0.22844	0.143885	0.76574
ENSG00000108588	CCDC47	0.0578885	0.733032	0.967647
ENSG00000108591	DRG2	-0.156495	0.299071	0.881616
ENSG00000108592	FTSJ3	-0.0519161	0.725531	0.967647
ENSG00000108604	SMARCD2	-0.116372	0.415897	0.905077
ENSG00000108622	ICAM2	0.140975	0.346048	0.887612
ENSG00000108639	SYNGR2	-0.0247443	0.859952	0.98479
ENSG00000108651	UTP6	-0.0145007	0.922882	0.992661
ENSG00000108654	DDX5	-0.0170639	0.925993	0.992661
ENSG00000108669	CYTH1	-0.0711487	0.544899	0.939841
ENSG00000108671	PSMD11	0.143355	0.312589	0.882336
ENSG00000173540	GMPPB	-0.382916	0.0156731	0.386261
ENSG00000108691	CCL2	-0.0205485	0.917668	0.992233
ENSG00000108774	RAB5C	0.111451	0.48725	0.931192
ENSG00000108784	NAGLU	-0.153742	0.336806	0.886576
ENSG00000108788	MLX	-0.11334	0.420347	0.905231
ENSG00000108819	PPP1R9B	-0.0515566	0.672475	0.960599
ENSG00000108826	MRPL27	0.0152967	0.942719	0.99407
ENSG00000108828	VAT1	0.0661501	0.538937	0.938165
ENSG00000108829	LRRC59	0.0474442	0.728405	0.967647
ENSG00000108840	HDAC5	0.0704757	0.662198	0.959178
ENSG00000108848	LUC7L3	0.105779	0.535401	0.936797
ENSG00000108861	DUSP3	-0.0554664	0.679996	0.960599
ENSG00000108883	EFTUD2	0.0376565	0.77175	0.970797
ENSG00000104897	SF3A2	-0.381395	0.0052253	0.231582
ENSG00000108953	YWHAE	-0.024804	0.840772	0.980477
ENSG00000109046	WSB1	-0.170613	0.46183	0.921463
ENSG00000109062	SLC9A3R1	-0.19258	0.131841	0.754394
ENSG00000109066	TMEM104	0.0438329	0.768576	0.970797
ENSG00000109111	SUPT6H	-0.279255	0.0374584	0.528867
ENSG00000109113	RAB34	-0.221434	0.126469	0.744608
ENSG00000109118	PHF12	0.0986891	0.53445	0.936797
ENSG00000109133	TMEM33	0.0161769	0.92632	0.992661
ENSG00000109171	SLAIN2	0.26107	0.0994756	0.712818
ENSG00000109180	OCIAD1	-0.00778017	0.954063	0.994746
ENSG00000109270	LAMTOR3	0.110236	0.463809	0.921463
ENSG00000109320	NFKB1	0.161583	0.303733	0.881616
ENSG00000109323	MANBA	0.0783084	0.585714	0.948681
ENSG00000109332	UBE2D3	0.00520742	0.962033	0.995514
ENSG00000109445	ZNF330	-0.0905277	0.657983	0.959178
ENSG00000109475	RPL34	-0.00169306	0.990663	0.997455
ENSG00000109519	GRPEL1	-0.0691669	0.638613	0.959178
ENSG00000109536	FRG1	0.0347705	0.830759	0.97834
ENSG00000109586	GALNT7	0.00680438	0.974149	0.996323
ENSG00000109606	DHX15	-0.213059	0.1479	0.770007
ENSG00000177169	ULK1	-0.381137	0.0196716	0.428711
ENSG00000109686	SH3D19	0.169373	0.233614	0.836413
ENSG00000109736	MFSD10	-0.270347	0.0358989	0.525918
ENSG00000109743	BST1	-0.24507	0.0940073	0.699449
ENSG00000109756	RAPGEF2	0.12017	0.567059	0.944911
ENSG00000109861	CTSC	0.0293525	0.831313	0.97834
ENSG00000109917	ZPR1	-0.00316453	0.983229	0.996532
ENSG00000109919	MTCH2	0.0867983	0.515716	0.932836
ENSG00000109920	FNBP4	-0.339343	0.122976	0.741827
ENSG00000109971	HSPA8	-0.0227413	0.871202	0.984971
ENSG00000110002	VWA5A	0.198242	0.298171	0.880857
ENSG00000110011	DNAJC4	-0.113782	0.430748	0.909974
ENSG00000110013	SIAE	-0.0129684	0.926904	0.992661
ENSG00000110031	LPXN	0.258056	0.204333	0.819058
ENSG00000110046	ATG2A	-0.210752	0.184953	0.795498
ENSG00000110047	EHD1	-0.0758716	0.547968	0.940606
ENSG00000110048	OSBP	-0.046421	0.787294	0.970797
ENSG00000110057	UNC93B1	-0.080437	0.593529	0.949317
ENSG00000110075	PPP6R3	0.110708	0.380882	0.898604
ENSG00000110080	ST3GAL4	-0.152748	0.190084	0.805223
ENSG00000110090	CPT1A	0.0590091	0.635366	0.959178
ENSG00000110107	PRPF19	-0.0903879	0.553482	0.941634
ENSG00000110108	TMEM109	0.204299	0.191612	0.805918
ENSG00000110200	ANAPC15	0.0646308	0.706768	0.964308
ENSG00000110321	EIF4G2	0.169903	0.143085	0.764187
ENSG00000110324	IL10RA	0.161193	0.344036	0.887612
ENSG00000110330	BIRC2	-0.119813	0.446685	0.914139
ENSG00000110344	UBE4A	-0.0690152	0.673628	0.960599
ENSG00000110367	DDX6	-0.116374	0.40165	0.898729
ENSG00000110395	CBL	-0.0431382	0.833216	0.978923
ENSG00000110422	HIPK3	0.0602056	0.734537	0.967647
ENSG00000110442	COMMD9	0.315181	0.037827	0.530584
ENSG00000266074	BAHCC1	-0.380342	0.0230842	0.450912
ENSG00000110497	AMBRA1	0.0203641	0.89132	0.988374
ENSG00000110514	MADD	-0.0899964	0.510489	0.932134
ENSG00000110651	CD81	-0.250997	0.098059	0.705918
ENSG00000110665	C11orf21	-0.0577673	0.758301	0.970797
ENSG00000110696	C11orf58	0.109359	0.382621	0.898604
ENSG00000110697	PITPNM1	-0.0804919	0.609284	0.956406
ENSG00000110700	RPS13	0.0168058	0.899091	0.988906
ENSG00000110711	AIP	0.189569	0.217369	0.830127
ENSG00000110713	NUP98	-0.122123	0.476247	0.927539
ENSG00000110717	NDUFS8	0.278292	0.0780253	0.67196
ENSG00000110719	TCIRG1	-0.158005	0.440784	0.913911
ENSG00000099998	GGT5	-0.37885	0.00347972	0.191167
ENSG00000110768	GTF2H1	-0.00211089	0.989758	0.997455
ENSG00000110799	VWF	0.377688	0.334158	0.886576
ENSG00000110841	PPFIBP1	0.0416676	0.814395	0.9747
ENSG00000110848	CD69	-0.0470329	0.766222	0.970797
ENSG00000110852	CLEC2B	-0.0629295	0.681075	0.960599
ENSG00000110871	COQ5	0.241234	0.166461	0.782254
ENSG00000110876	SELPLG	-0.00364978	0.977736	0.996323
ENSG00000110880	CORO1C	0.16538	0.284631	0.870085
ENSG00000110906	KCTD10	0.0595527	0.667404	0.959178
ENSG00000110917	MLEC	-0.163328	0.184251	0.795498
ENSG00000110931	CAMKK2	-0.236358	0.0746725	0.660775
ENSG00000110934	BIN2	-0.0752365	0.658154	0.959178
ENSG00000110955	ATP5B	0.20705	0.123262	0.741827
ENSG00000110958	PTGES3	0.0491096	0.688017	0.961549
ENSG00000111011	RSRC2	-0.124571	0.51045	0.932134
ENSG00000111057	KRT18	0.0599672	0.695687	0.961985
ENSG00000111142	METAP2	0.0140242	0.911928	0.992233
ENSG00000111144	LTA4H	-0.289462	0.0799543	0.676853
ENSG00000111203	ITFG2	-0.238534	0.233985	0.836413
ENSG00000172893	DHCR7	-0.377896	0.0175971	0.40705
ENSG00000111229	ARPC3	-0.00904371	0.939734	0.993741
ENSG00000111237	VPS29	-0.162898	0.251979	0.847364
ENSG00000111252	SH2B3	0.048101	0.742597	0.970797
ENSG00000111276	CDKN1B	-0.125757	0.334863	0.886576
ENSG00000111321	LTBR	0.0371409	0.760436	0.970797
ENSG00000111328	CDK2AP1	0.0315459	0.882936	0.988134
ENSG00000111348	ARHGDIB	-0.056644	0.654369	0.959178
ENSG00000111361	EIF2B1	0.110555	0.477366	0.927646
ENSG00000111412	C12orf49	-0.185946	0.27476	0.860089
ENSG00000111481	COPZ1	0.114007	0.335134	0.886576
ENSG00000111530	CAND1	0.0235692	0.865445	0.984971
ENSG00000111540	RAB5B	-0.242972	0.0368179	0.528867
ENSG00000111596	CNOT2	0.0735162	0.6103	0.956406
ENSG00000111602	TIMELESS	-0.112193	0.494675	0.932134
ENSG00000111605	CPSF6	0.0762379	0.558387	0.942907
ENSG00000111615	KRR1	0.233354	0.133578	0.754394
ENSG00000111639	MRPL51	0.153494	0.30992	0.881616
ENSG00000111640	GAPDH	0.0784472	0.534705	0.936797
ENSG00000111641	NOP2	-0.182188	0.31833	0.885655
ENSG00000111642	CHD4	-0.0867035	0.483365	0.929923
ENSG00000163597	SNHG16	-0.375349	0.0236201	0.455732
ENSG00000111652	COPS7A	-0.108453	0.502039	0.932134
ENSG00000111666	CHPT1	-0.000928307	0.994824	0.998041
ENSG00000111667	USP5	0.0017399	0.990653	0.997455
ENSG00000111669	TPI1	-0.232796	0.114879	0.731504
ENSG00000111670	GNPTAB	-0.143777	0.365103	0.892524
ENSG00000111676	ATN1	-0.0818503	0.57213	0.945853
ENSG00000111678	C12orf57	0.065383	0.723618	0.967647
ENSG00000111679	PTPN6	0.205659	0.100471	0.715847
ENSG00000111684	LPCAT3	-0.146429	0.267732	0.855623
ENSG00000111707	SUDS3	-0.185288	0.213154	0.824173
ENSG00000111716	LDHB	-0.225236	0.0599456	0.605423
ENSG00000111737	RAB35	0.126918	0.382639	0.898604
ENSG00000111752	PHC1	-0.010495	0.939015	0.993741
ENSG00000111786	SRSF9	0.135682	0.288982	0.871114
ENSG00000111790	FGFR1OP2	0.0353181	0.827906	0.97834
ENSG00000111802	TDP2	0.144099	0.364846	0.892524
ENSG00000111843	TMEM14C	-0.00242039	0.987511	0.997455
ENSG00000111885	MAN1A1	-0.138007	0.5568	0.942907
ENSG00000111897	SERINC1	0.135551	0.417867	0.905077
ENSG00000111911	HINT3	-0.0210596	0.889952	0.988374
ENSG00000111912	NCOA7	0.157637	0.260771	0.850717
ENSG00000112062	MAPK14	-0.0317016	0.828314	0.97834
ENSG00000112078	KCTD20	-0.00443759	0.97591	0.996323
ENSG00000112079	STK38	-0.15031	0.293012	0.877505
ENSG00000112081	SRSF3	-0.162223	0.230822	0.836413
ENSG00000112096	SOD2	0.0169058	0.921497	0.992661
ENSG00000112110	MRPL18	0.0970043	0.569825	0.945347
ENSG00000112118	MCM3	-0.0156981	0.908693	0.990689
ENSG00000112137	PHACTR1	0.00143841	0.992982	0.997615
ENSG00000112146	FBXO9	0.0536741	0.759216	0.970797
ENSG00000112242	E2F3	0.0126843	0.931165	0.992661
ENSG00000112245	PTP4A1	0.0866126	0.533618	0.936797
ENSG00000112304	ACOT13	-0.143502	0.375125	0.896832
ENSG00000112306	RPS12	0.100247	0.415516	0.905077
ENSG00000112308	C6orf62	0.112147	0.330079	0.886576
ENSG00000112335	SNX3	0.0659838	0.590718	0.949317
ENSG00000160752	FDPS	-0.375168	0.012847	0.373721
ENSG00000112343	TRIM38	-0.000387012	0.997568	0.999463
ENSG00000112367	FIG4	0.195636	0.200939	0.816248
ENSG00000112473	SLC39A7	-0.133632	0.398899	0.898604
ENSG00000112511	PHF1	-0.0649833	0.729022	0.967647
ENSG00000112514	CUTA	-0.216538	0.116311	0.734054
ENSG00000112531	QKI	0.139723	0.357544	0.887612
ENSG00000112576	CCND3	0.140571	0.253746	0.849146
ENSG00000112640	PPP2R5D	-0.0223401	0.871988	0.985165
ENSG00000112658	SRF	-0.177633	0.174027	0.789582
ENSG00000112659	CUL9	-0.331824	0.148294	0.770007
ENSG00000112667	DNPH1	0.027342	0.901811	0.989696
ENSG00000112679	DUSP22	0.11531	0.526459	0.935065
ENSG00000112695	COX7A2	0.202405	0.241209	0.842801
ENSG00000112697	TMEM30A	0.275499	0.0455214	0.568909
ENSG00000112699	GMDS	-0.25028	0.142585	0.764187
ENSG00000112701	SENP6	0.00813755	0.958917	0.995314
ENSG00000165494	PCF11	-0.374895	0.0301249	0.498052
ENSG00000112739	PRPF4B	-0.0637791	0.664272	0.959178
ENSG00000112759	SLC29A1	-0.14814	0.337136	0.886576
ENSG00000112773	FAM46A	-0.272772	0.0709869	0.64438
ENSG00000112787	FBRSL1	-0.266185	0.0860397	0.688579
ENSG00000112851	ERBIN	-0.203137	0.314693	0.883551
ENSG00000112977	DAP	-0.0536599	0.638302	0.959178
ENSG00000112983	BRD8	0.0502265	0.758258	0.970797
ENSG00000112992	NNT	0.010063	0.951938	0.994746
ENSG00000113013	HSPA9	0.0791423	0.525748	0.934859
ENSG00000113048	MRPS27	0.25058	0.0547293	0.590271
ENSG00000068745	IP6K2	-0.374694	0.013542	0.37676
ENSG00000109685	NSD2	-0.370494	0.00264493	0.181973
ENSG00000113141	IK	-0.087914	0.512673	0.932134
ENSG00000113163	COL4A3BP	-0.0086324	0.962274	0.995514
ENSG00000113194	FAF2	0.0587217	0.694552	0.961985
ENSG00000113269	RNF130	0.221101	0.0907235	0.693671
ENSG00000113273	ARSB	-0.371292	0.0383098	0.533102
ENSG00000113282	CLINT1	-0.0312631	0.835307	0.980069
ENSG00000113300	CNOT6	0.0803345	0.579739	0.946972
ENSG00000113312	TTC1	-0.0711482	0.634957	0.959178
ENSG00000113328	CCNG1	-0.164037	0.278767	0.864917
ENSG00000113360	DROSHA	-0.162714	0.256165	0.850717
ENSG00000113368	LMNB1	-0.150685	0.316791	0.884935
ENSG00000113369	ARRDC3	0.180813	0.470789	0.927162
ENSG00000113384	GOLPH3	0.107507	0.396948	0.898604
ENSG00000113387	SUB1	0.161259	0.261011	0.850717
ENSG00000113407	TARS	-0.048687	0.748418	0.970797
ENSG00000113441	LNPEP	-0.0870391	0.662833	0.959178
ENSG00000113448	PDE4D	0.334777	0.0918957	0.699449
ENSG00000113504	SLC12A7	0.0924567	0.500038	0.932134
ENSG00000113532	ST8SIA4	0.0253481	0.899669	0.989336
ENSG00000113552	GNPDA1	-0.272207	0.0493336	0.578539
ENSG00000113558	SKP1	-0.0394893	0.781285	0.970797
ENSG00000113575	PPP2CA	0.206622	0.178866	0.79479
ENSG00000113580	NR3C1	0.10849	0.546547	0.939841
ENSG00000113583	C5orf15	0.0114212	0.938578	0.993741
ENSG00000113643	RARS	0.148789	0.386432	0.898604
ENSG00000113648	H2AFY	-0.1416	0.203568	0.817685
ENSG00000113649	TCERG1	-0.240336	0.150548	0.770007
ENSG00000185198	PRSS57	-0.370282	0.010658	0.338617
ENSG00000113716	HMGXB3	-0.193757	0.239607	0.841434
ENSG00000113719	ERGIC1	-0.0743447	0.580952	0.946972
ENSG00000113732	ATP6V0E1	0.0336967	0.802756	0.972602
ENSG00000113749	HRH2	-0.105203	0.505457	0.932134
ENSG00000113758	DBN1	0.0450338	0.774512	0.970797
ENSG00000113810	SMC4	-0.185673	0.203027	0.817685
ENSG00000113811	SELENOK	-0.190081	0.258002	0.850717
ENSG00000113845	TIMMDC1	0.1471	0.317192	0.885368
ENSG00000135372	NAT10	-0.369488	0.00959023	0.324223
ENSG00000114026	OGG1	0.077205	0.656293	0.959178
ENSG00000114030	KPNA1	-0.0741501	0.633183	0.959178
ENSG00000114062	UBE3A	0.149378	0.371915	0.896832
ENSG00000114120	SLC25A36	-0.0352006	0.852146	0.983418
ENSG00000114125	RNF7	-0.0120088	0.947034	0.994746
ENSG00000114126	TFDP2	0.0145298	0.933867	0.992661
ENSG00000114316	USP4	0.244122	0.0923801	0.699449
ENSG00000114331	ACAP2	0.18525	0.322874	0.886576
ENSG00000114353	GNAI2	-0.0810902	0.497341	0.932134
ENSG00000114354	TFG	-0.14018	0.373545	0.896832
ENSG00000114383	TUSC2	-0.119766	0.427985	0.907332
ENSG00000114391	RPL24	0.0668216	0.609808	0.956406
ENSG00000114395	CYB561D2	-0.0705221	0.646549	0.959178
ENSG00000114416	FXR1	0.0523157	0.708544	0.964371
ENSG00000114450	GNB4	-0.166364	0.375868	0.89696
ENSG00000114480	GBE1	0.0489661	0.725223	0.967647
ENSG00000114503	NCBP2	-0.0271784	0.843422	0.980477
ENSG00000114573	ATP6V1A	0.11112	0.466532	0.923607
ENSG00000114626	ABTB1	-0.183655	0.262986	0.850717
ENSG00000114650	SCAP	-0.0726426	0.556718	0.942907
ENSG00000114686	MRPL3	-0.0660581	0.639263	0.959178
ENSG00000116717	GADD45A	-0.368597	0.0121053	0.362748
ENSG00000114738	MAPKAPK3	-0.212814	0.0522637	0.581516
ENSG00000114745	GORASP1	0.0481516	0.765868	0.970797
ENSG00000114779	ABHD14B	-0.0872255	0.564582	0.944776
ENSG00000114784	EIF1B	-0.0200879	0.885558	0.9883
ENSG00000114850	SSR3	-0.0382243	0.775338	0.970797
ENSG00000114857	NKTR	-0.280457	0.255072	0.850717
ENSG00000114861	FOXP1	-0.0987606	0.585866	0.948681
ENSG00000114867	EIF4G1	-0.0497737	0.721185	0.967647
ENSG00000114902	SPCS1	0.14961	0.257849	0.850717
ENSG00000114942	EEF1B2	-0.0600205	0.569258	0.945105
ENSG00000114956	DGUOK	0.049454	0.748281	0.970797
ENSG00000114978	MOB1A	0.0416086	0.746086	0.970797
ENSG00000114982	KANSL3	0.144699	0.256248	0.850717
ENSG00000115020	PIKFYVE	-0.119903	0.51659	0.932836
ENSG00000115053	NCL	-0.114035	0.458156	0.921058
ENSG00000115073	ACTR1B	0.0888631	0.582932	0.946972
ENSG00000115091	ACTR3	0.0390534	0.765886	0.970797
ENSG00000115128	SF3B6	0.0374775	0.787791	0.970797
ENSG00000115159	GPD2	-0.00803119	0.968178	0.996323
ENSG00000115165	CYTIP	0.299732	0.0590488	0.602134
ENSG00000115204	MPV17	-0.0407303	0.779754	0.970797
ENSG00000115207	GTF3C2	-0.144883	0.344464	0.887612
ENSG00000115216	NRBP1	-0.138947	0.245474	0.846507
ENSG00000115232	ITGA4	-0.0953951	0.672413	0.960599
ENSG00000115233	PSMD14	0.0360967	0.809146	0.974379
ENSG00000107566	ERLIN1	-0.367834	0.00328714	0.186413
ENSG00000115241	PPM1G	-0.0916007	0.501422	0.932134
ENSG00000115268	RPS15	0.133497	0.351164	0.887612
ENSG00000178802	MPI	-0.367074	0.0141663	0.377338
ENSG00000115275	MOGS	-0.116857	0.427438	0.907332
ENSG00000119707	RBM25	-0.365304	0.0156213	0.386261
ENSG00000115306	SPTBN1	0.0399366	0.825495	0.97834
ENSG00000115307	AUP1	0.283004	0.0469543	0.570044
ENSG00000115310	RTN4	-0.0720546	0.578412	0.946972
ENSG00000115317	HTRA2	0.164338	0.279297	0.865299
ENSG00000115318	LOXL3	-0.209414	0.170904	0.78838
ENSG00000115325	DOK1	0.0975996	0.423257	0.906557
ENSG00000115350	POLE4	-0.101066	0.614347	0.956945
ENSG00000115355	CCDC88A	-0.0343457	0.836654	0.980341
ENSG00000115415	STAT1	0.133092	0.425434	0.906792
ENSG00000115419	GLS	-0.0914501	0.523179	0.934191
ENSG00000115457	IGFBP2	0.0122735	0.933155	0.992661
ENSG00000132382	MYBBP1A	-0.364672	0.0259195	0.470756
ENSG00000115464	USP34	-0.183713	0.212496	0.824045
ENSG00000115484	CCT4	-0.173488	0.255787	0.850717
ENSG00000115486	GGCX	-0.140929	0.392281	0.898604
ENSG00000115524	SF3B1	0.0174447	0.922801	0.992661
ENSG00000115548	KDM3A	-0.238109	0.192825	0.80695
ENSG00000115594	IL1R1	-0.0272393	0.875742	0.985928
ENSG00000115602	IL1RL1	0.134623	0.466108	0.923607
ENSG00000115649	CNPPD1	-0.155539	0.308237	0.881616
ENSG00000115652	UXS1	-0.175393	0.190396	0.805898
ENSG00000115661	STK16	0.146578	0.387696	0.898604
ENSG00000115677	HDLBP	-0.147516	0.156022	0.774823
ENSG00000115685	PPP1R7	0.218946	0.110641	0.726749
ENSG00000115694	STK25	-0.101673	0.563983	0.944776
ENSG00000115756	HPCAL1	-0.142463	0.35892	0.887872
ENSG00000115758	ODC1	0.0233914	0.867278	0.984971
ENSG00000115760	BIRC6	0.0536293	0.71885	0.967647
ENSG00000115762	PLEKHB2	0.039313	0.777271	0.970797
ENSG00000115806	GORASP2	-0.149451	0.246846	0.846507
ENSG00000115816	CEBPZ	0.147067	0.347238	0.887612
ENSG00000115866	DARS	0.0449512	0.767518	0.970797
ENSG00000115875	SRSF7	-0.301789	0.0399862	0.540868
ENSG00000115902	SLC1A4	-0.0707603	0.676771	0.960599
ENSG00000115935	WIPF1	0.2005	0.182283	0.79479
ENSG00000115944	COX7A2L	-0.00794478	0.955837	0.994897
ENSG00000115956	PLEK	0.0667946	0.609071	0.956406
ENSG00000115966	ATF2	0.299261	0.0840492	0.681839
ENSG00000115977	AAK1	-0.0728176	0.624429	0.958421
ENSG00000115993	TRAK2	-0.0905337	0.633927	0.959178
ENSG00000116001	TIA1	-0.223708	0.252964	0.847364
ENSG00000116017	ARID3A	-0.0952741	0.550898	0.941092
ENSG00000116030	SUMO1	0.0166994	0.91044	0.991785
ENSG00000116044	NFE2L2	0.0773305	0.601531	0.955369
ENSG00000116062	MSH6	0.155862	0.2397	0.841434
ENSG00000116133	DHCR24	-0.362031	0.0351811	0.518283
ENSG00000116161	CACYBP	-0.0444881	0.746516	0.970797
ENSG00000116171	SCP2	0.0514059	0.689705	0.961976
ENSG00000116199	FAM20B	-0.076391	0.677091	0.960599
ENSG00000116209	TMEM59	0.092239	0.451725	0.916931
ENSG00000116221	MRPL37	0.170039	0.210219	0.822647
ENSG00000116237	ICMT	0.0466073	0.75279	0.970797
ENSG00000116251	RPL22	0.0017908	0.98924	0.997455
ENSG00000116260	QSOX1	-0.293437	0.0401989	0.540868
ENSG00000116266	STXBP3	0.153042	0.271653	0.858416
ENSG00000116288	PARK7	-0.0503698	0.708022	0.964371
ENSG00000116337	AMPD2	-0.269559	0.116705	0.734054
ENSG00000116350	SRSF4	0.0183771	0.904537	0.989697
ENSG00000116406	EDEM3	-0.0672564	0.724063	0.967647
ENSG00000116459	ATP5F1	0.0954602	0.450146	0.91669
ENSG00000116473	RAP1A	0.120129	0.394047	0.898604
ENSG00000116478	HDAC1	-0.163304	0.185708	0.796385
ENSG00000116489	CAPZA1	0.150498	0.206627	0.820277
ENSG00000116514	RNF19B	0.279888	0.162445	0.778324
ENSG00000116521	SCAMP3	-0.0381192	0.798797	0.971551
ENSG00000105472	CLEC11A	-0.364307	0.0106453	0.338617
ENSG00000116580	GON4L	-0.204932	0.258834	0.850717
ENSG00000116584	ARHGEF2	-0.0808664	0.517729	0.933453
ENSG00000116586	LAMTOR2	0.261208	0.130035	0.754394
ENSG00000116604	MEF2D	0.0213681	0.886879	0.988374
ENSG00000116649	SRM	-0.171837	0.34528	0.887612
ENSG00000116670	MAD2L2	-0.371133	0.0350326	0.517541
ENSG00000116679	IVNS1ABP	-0.167413	0.220553	0.835262
ENSG00000116685	KIAA2013	-0.0894971	0.463392	0.921463
ENSG00000116688	MFN2	-0.0428288	0.721868	0.967647
ENSG00000116691	MIIP	-0.180202	0.384115	0.898604
ENSG00000116698	SMG7	-0.0887368	0.545437	0.939841
ENSG00000116701	NCF2	-0.118544	0.483779	0.929923
ENSG00000072310	SREBF1	-0.36409	0.00433734	0.209864
ENSG00000116731	PRDM2	-0.105643	0.476819	0.927608
ENSG00000116741	RGS2	0.335509	0.0521075	0.581516
ENSG00000116754	SRSF11	-0.204655	0.270175	0.855699
ENSG00000116786	PLEKHM2	0.0412609	0.737325	0.968531
ENSG00000116809	ZBTB17	0.144939	0.388126	0.898604
ENSG00000116852	KIF21B	-0.111016	0.441783	0.913911
ENSG00000116857	TMEM9	0.116227	0.463151	0.921463
ENSG00000116863	ADPRHL2	0.0891976	0.604548	0.955804
ENSG00000116871	MAP7D1	0.20037	0.108501	0.725264
ENSG00000111206	FOXM1	-0.359748	0.0248826	0.463915
ENSG00000116906	GNPAT	0.0952831	0.506707	0.932134
ENSG00000116918	TSNAX	0.206317	0.16388	0.778324
ENSG00000116977	LGALS8	-0.192449	0.205217	0.819677
ENSG00000116984	MTR	-0.123958	0.506191	0.932134
ENSG00000117009	KMO	0.163433	0.261737	0.850717
ENSG00000117054	ACADM	0.0410226	0.786718	0.970797
ENSG00000117115	PADI2	0.0618356	0.714396	0.966667
ENSG00000117118	SDHB	0.277463	0.0401164	0.540868
ENSG00000117139	KDM5B	-0.017161	0.896069	0.988374
ENSG00000117153	KLHL12	-0.175656	0.274014	0.859696
ENSG00000117242	PINK1-AS	-0.134494	0.332792	0.886576
ENSG00000117305	HMGCL	0.0376634	0.815566	0.9747
ENSG00000117335	CD46	-0.174564	0.26494	0.851827
ENSG00000117362	APH1A	-0.0316494	0.792326	0.97152
ENSG00000117385	P3H1	-0.115365	0.482652	0.929923
ENSG00000117394	SLC2A1	0.175511	0.385608	0.898604
ENSG00000117395	EBNA1BP2	0.00529734	0.974473	0.996323
ENSG00000117399	CDC20	-0.363997	0.0781304	0.67196
ENSG00000117408	IPO13	0.132552	0.405215	0.900737
ENSG00000117410	ATP6V0B	0.0131632	0.924259	0.992661
ENSG00000117448	AKR1A1	-0.207373	0.159633	0.776582
ENSG00000117450	PRDX1	-0.0369608	0.846582	0.980883
ENSG00000117500	TMED5	0.10299	0.433051	0.909974
ENSG00000087111	PIGS	-0.359735	0.00684589	0.261632
ENSG00000117523	PRRC2C	0.14095	0.455655	0.920032
ENSG00000117528	ABCD3	-0.0964228	0.567842	0.944911
ENSG00000117592	PRDX6	-0.119002	0.36755	0.892898
ENSG00000117614	SYF2	0.191121	0.149743	0.770007
ENSG00000117616	RSRP1	-0.209922	0.701135	0.963501
ENSG00000163472	TMEM79	-0.358043	0.025913	0.470756
ENSG00000117640	MTFR1L	-0.0701691	0.642513	0.959178
ENSG00000117676	RPS6KA1	0.0247622	0.829467	0.97834
ENSG00000117691	NENF	-0.326632	0.100951	0.715847
ENSG00000117713	ARID1A	-0.150288	0.327147	0.886576
ENSG00000117748	RPA2	0.0320776	0.815946	0.9747
ENSG00000117751	PPP1R8	0.267447	0.0525453	0.582406
ENSG00000089248	ERP29	-0.357509	0.00569163	0.238235
ENSG00000117862	TXNDC12	-0.141507	0.33906	0.887612
ENSG00000117868	ESYT2	-0.105827	0.412964	0.904464
ENSG00000117899	MESD	-0.203493	0.111844	0.728229
ENSG00000117984	CTSD	0.114143	0.479034	0.929174
ENSG00000118046	STK11	-0.0731244	0.571757	0.945853
ENSG00000118058	KMT2A	-0.114659	0.593541	0.949317
ENSG00000118181	RPS25	-0.0864942	0.489079	0.931192
ENSG00000118217	ATF6	0.135031	0.441287	0.913911
ENSG00000118260	CREB1	0.010388	0.952765	0.994746
ENSG00000118363	SPCS2	0.00970644	0.951076	0.994746
ENSG00000118482	PHF3	-0.08353	0.608089	0.956406
ENSG00000118495	PLAGL1	-0.0228975	0.907132	0.99052
ENSG00000118508	RAB32	0.104884	0.385636	0.898604
ENSG00000118513	MYB	-0.165811	0.15033	0.770007
ENSG00000118515	SGK1	0.288584	0.090137	0.693671
ENSG00000118518	RNF146	0.0413617	0.798105	0.971551
ENSG00000118564	FBXL5	0.136387	0.303636	0.881616
ENSG00000118579	MED28	-0.0916171	0.459187	0.921058
ENSG00000118640	VAMP8	-0.191998	0.204641	0.819058
ENSG00000118680	MYL12B	-0.0121429	0.926896	0.992661
ENSG00000118689	FOXO3	-0.0157245	0.939316	0.993741
ENSG00000122257	RBBP6	-0.355115	0.0226845	0.450912
ENSG00000118707	TGIF2	-0.150467	0.354645	0.887612
ENSG00000118762	PKD2	-0.0977841	0.622651	0.958421
ENSG00000118816	CCNI	-0.0562389	0.663569	0.959178
ENSG00000118855	MFSD1	0.100823	0.42844	0.907832
ENSG00000118900	UBN1	-0.0497188	0.762937	0.970797
ENSG00000118960	HS1BP3	0.118053	0.464371	0.922097
ENSG00000118985	ELL2	0.196735	0.2095	0.822647
ENSG00000119013	NDUFB3	0.177647	0.288392	0.871114
ENSG00000119048	UBE2B	0.0170831	0.902194	0.989696
ENSG00000119185	ITGB1BP1	-0.272446	0.0603392	0.605423
ENSG00000119203	CPSF3	-0.0689868	0.61556	0.956945
ENSG00000119285	HEATR1	-0.0461703	0.774087	0.970797
ENSG00000119314	PTBP3	0.132003	0.357343	0.887612
ENSG00000088038	CNOT3	-0.354818	0.0067168	0.261632
ENSG00000119321	FKBP15	0.0153955	0.914454	0.992233
ENSG00000119333	WDR34	0.0381913	0.8592	0.98479
ENSG00000119335	SET	0.0958135	0.434113	0.90998
ENSG00000119383	PTPA	0.17133	0.239632	0.841434
ENSG00000119392	GLE1	-0.00669746	0.96451	0.995514
ENSG00000119396	RAB14	0.202985	0.0980485	0.705918
ENSG00000119402	FBXW2	0.176357	0.191272	0.805918
ENSG00000119403	PHF19	-0.24837	0.0706366	0.643416
ENSG00000119408	NEK6	-0.14617	0.37161	0.896832
ENSG00000119411	BSPRY	-0.00833704	0.959351	0.995314
ENSG00000119414	PPP6C	0.260235	0.0533092	0.584996
ENSG00000119487	MAPKAP1	0.189066	0.169156	0.784039
ENSG00000119522	DENND1A	-0.0141889	0.914986	0.992233
ENSG00000119523	ALG2	-0.0956177	0.509962	0.932134
ENSG00000119535	CSF3R	-0.254801	0.0660758	0.624523
ENSG00000119541	VPS4B	0.0916962	0.611128	0.956406
ENSG00000182378	PLCXD1	-0.354067	0.0230797	0.450912
ENSG00000119596	YLPM1	-0.188098	0.181876	0.79479
ENSG00000119616	FCF1	0.197612	0.223435	0.835262
ENSG00000119632	IFI27L2	0.19618	0.260785	0.850717
ENSG00000119638	NEK9	-0.0661602	0.669593	0.959974
ENSG00000119655	NPC2	-0.0153866	0.923589	0.992661
ENSG00000119682	AREL1	0.0994818	0.599665	0.954038
ENSG00000119688	ABCD4	-0.108489	0.540794	0.938196
ENSG00000119689	DLST	0.035308	0.791653	0.97152
ENSG00000104894	CD37	-0.353254	0.00211311	0.159285
ENSG00000100075	SLC25A1	-0.351892	0.0132136	0.376285
ENSG00000119720	NRDE2	0.145928	0.302814	0.881616
ENSG00000119729	RHOQ	0.035565	0.792509	0.97152
ENSG00000119760	SUPT7L	-0.0528031	0.767704	0.970797
ENSG00000119772	DNMT3A	-0.080676	0.593893	0.949317
ENSG00000119777	TMEM214	-0.120128	0.374924	0.896832
ENSG00000119801	YPEL5	0.0171709	0.904535	0.989697
ENSG00000119820	YIPF4	0.241046	0.167971	0.782254
ENSG00000119844	AFTPH	0.186971	0.173377	0.789582
ENSG00000119977	TCTN3	0.201245	0.237986	0.840683
ENSG00000119979	FAM45A	-0.138077	0.259918	0.850717
ENSG00000120008	WDR11	0.1359	0.529424	0.936401
ENSG00000120063	GNA13	0.105955	0.543451	0.939841
ENSG00000120071	KANSL1	-0.0973314	0.560963	0.943707
ENSG00000120093	HOXB3	-0.283338	0.164539	0.778324
ENSG00000120253	NUP43	0.156361	0.366269	0.892898
ENSG00000120265	PCMT1	0.0347524	0.810563	0.974379
ENSG00000120306	CYSTM1	0.291518	0.0664424	0.625745
ENSG00000120314	WDR55	-0.146194	0.297354	0.879982
ENSG00000120437	ACAT2	-0.255523	0.0879737	0.691723
ENSG00000120438	TCP1	-0.174437	0.164661	0.778324
ENSG00000120451	SNX19	0.100146	0.572138	0.945853
ENSG00000120533	ENY2	-0.00366967	0.980014	0.996323
ENSG00000120685	PROSER1	0.133109	0.361963	0.890187
ENSG00000120686	UFM1	0.149778	0.318626	0.885655
ENSG00000120690	ELF1	0.364077	0.0766908	0.669267
ENSG00000120694	HSPH1	-0.0762182	0.644111	0.959178
ENSG00000120705	ETF1	0.0496882	0.68551	0.960997
ENSG00000120709	FAM53C	0.0682134	0.633082	0.959178
ENSG00000120725	SIL1	-0.0480203	0.773275	0.970797
ENSG00000120727	PAIP2	0.00957174	0.937672	0.993741
ENSG00000120733	KDM3B	-0.132898	0.475074	0.927539
ENSG00000120738	EGR1	-0.43495	0.0368996	0.528867
ENSG00000120742	SERP1	-0.191464	0.154816	0.771248
ENSG00000120802	TMPO	-0.0221205	0.866168	0.984971
ENSG00000120833	SOCS2	0.246523	0.058839	0.602134
ENSG00000120837	NFYB	-0.0116271	0.930093	0.992661
ENSG00000120868	APAF1	-0.219054	0.135594	0.757206
ENSG00000120885	CLU	0.0914259	0.463459	0.921463
ENSG00000120889	TNFRSF10B	0.338125	0.0315497	0.503772
ENSG00000120899	PTK2B	-0.0186566	0.888219	0.988374
ENSG00000120948	TARDBP	0.00377195	0.979632	0.996323
ENSG00000120963	ZNF706	0.0828363	0.581328	0.946972
ENSG00000120992	LYPLA1	0.137705	0.306048	0.881616
ENSG00000100300	TSPO	-0.351696	0.00998569	0.32509
ENSG00000187109	NAP1L1	-0.351018	0.00240203	0.175949
ENSG00000121053	EPX	0.0507348	0.815458	0.9747
ENSG00000121060	TRIM25	0.0528365	0.697093	0.961985
ENSG00000121067	SPOP	0.178295	0.272944	0.858896
ENSG00000121073	SLC35B1	-0.00758384	0.959119	0.995314
ENSG00000121104	FAM117A	0.181379	0.122563	0.741827
ENSG00000121281	ADCY7	0.0876658	0.596741	0.952093
ENSG00000121390	PSPC1	-0.338862	0.0319652	0.503772
ENSG00000121552	CSTA	-0.098734	0.534083	0.936797
ENSG00000121579	NAA50	0.0216726	0.874198	0.985698
ENSG00000121680	PEX16	0.0274296	0.867154	0.984971
ENSG00000121691	CAT	-0.133094	0.472685	0.927539
ENSG00000121741	ZMYM2	-0.0521741	0.758356	0.970797
ENSG00000121749	TBC1D15	0.0916906	0.572053	0.945853
ENSG00000121766	ZCCHC17	-0.152083	0.353374	0.887612
ENSG00000121774	KHDRBS1	-0.0546168	0.667307	0.959178
ENSG00000121892	PDS5A	0.002157	0.987663	0.997455
ENSG00000121966	CXCR4	0.287937	0.0603655	0.605423
ENSG00000122026	RPL21	0.0766973	0.62144	0.958325
ENSG00000122033	MTIF3	-0.163867	0.319862	0.885655
ENSG00000122034	GTF3A	0.235751	0.108222	0.724417
ENSG00000122068	FYTTD1	0.298697	0.0456785	0.569135
ENSG00000122122	SASH3	0.182544	0.229167	0.836413
ENSG00000122140	MRPS2	-0.00531948	0.976244	0.996323
ENSG00000204525	HLA-C	-0.349281	0.0168518	0.400345
ENSG00000122218	COPA	-0.147726	0.359667	0.888263
ENSG00000122223	CD244	0.175866	0.223831	0.835262
ENSG00000178921	PFAS	-0.347582	0.0245285	0.460367
ENSG00000122299	ZC3H7A	-0.246187	0.145579	0.768553
ENSG00000162676	GFI1	-0.347347	0.00986737	0.32509
ENSG00000122376	FAM35A	0.0286847	0.856265	0.98479
ENSG00000122390	NAA60	0.0585423	0.671825	0.960599
ENSG00000122406	RPL5	0.0133632	0.918372	0.992233
ENSG00000122490	PQLC1	-0.0848144	0.548597	0.940606
ENSG00000122515	ZMIZ2	-0.0808483	0.724941	0.967647
ENSG00000276180	HIST1H4I	-0.347301	0.0297045	0.496313
ENSG00000122565	CBX3	-0.0201811	0.866776	0.984971
ENSG00000122566	HNRNPA2B1	-0.123304	0.303362	0.881616
ENSG00000122641	INHBA	0.111439	0.615385	0.956945
ENSG00000122644	ARL4A	0.0644967	0.714507	0.966667
ENSG00000162298	SYVN1	-0.346472	0.0138614	0.377338
ENSG00000122692	SMU1	0.0728875	0.581937	0.946972
ENSG00000225855	RUSC1-AS1	-0.345991	0.0188959	0.420494
ENSG00000122705	CLTA	-0.191819	0.125746	0.744608
ENSG00000122779	TRIM24	-0.17176	0.256641	0.850717
ENSG00000122783	C7orf49	0.137253	0.366206	0.892898
ENSG00000122861	PLAU	-0.166591	0.192372	0.80695
ENSG00000103365	GGA2	-0.345711	0.0188229	0.420494
ENSG00000122952	ZWINT	-0.211877	0.277294	0.863423
ENSG00000122958	VPS26A	0.201158	0.165644	0.780703
ENSG00000122971	ACADS	-0.152234	0.279835	0.865299
ENSG00000123064	DDX54	-0.0608704	0.616842	0.956945
ENSG00000123066	MED13L	-0.110425	0.618915	0.957407
ENSG00000123091	RNF11	0.118294	0.412338	0.904256
ENSG00000123104	ITPR2	0.0718972	0.689356	0.961976
ENSG00000123136	DDX39A	-0.288953	0.0839198	0.681839
ENSG00000123143	PKN1	-0.171743	0.185942	0.796385
ENSG00000123144	TRIR	-0.183304	0.22098	0.835262
ENSG00000123146	ADGRE5	0.120217	0.404745	0.900737
ENSG00000123154	WDR83	0.0485161	0.720847	0.967647
ENSG00000123179	EBPL	-0.114881	0.357493	0.887612
ENSG00000123200	ZC3H13	-0.00487149	0.977933	0.996323
ENSG00000123329	ARHGAP9	-0.118194	0.569056	0.945105
ENSG00000123338	NCKAP1L	-0.0623118	0.643443	0.959178
ENSG00000123349	PFDN5	0.271967	0.0460976	0.569135
ENSG00000123353	ORMDL2	0.0404645	0.77775	0.970797
ENSG00000123358	NR4A1	0.168007	0.242449	0.843071
ENSG00000123374	CDK2	-0.212017	0.171306	0.78838
ENSG00000123395	ATG101	-0.0188111	0.913029	0.992233
ENSG00000123405	NFE2	0.0962211	0.381968	0.898604
ENSG00000123416	TUBA1B	-0.164346	0.284581	0.870085
ENSG00000123505	AMD1	-0.0567462	0.675893	0.960599
ENSG00000123562	MORF4L2	-0.203852	0.152239	0.770007
ENSG00000123609	NMI	0.257065	0.0763653	0.667912
ENSG00000123610	TNFAIP6	0.641215	0.0872642	0.690019
ENSG00000123636	BAZ2B	-0.00763252	0.965527	0.996125
ENSG00000123728	RAP2C	0.216399	0.197389	0.811353
ENSG00000123908	AGO2	0.138227	0.389622	0.898604
ENSG00000123933	MXD4	-0.149435	0.267248	0.855623
ENSG00000123975	CKS2	-0.205456	0.309367	0.881616
ENSG00000124006	OBSL1	-0.168726	0.311546	0.881616
ENSG00000110721	CHKA	-0.343901	0.0292559	0.492957
ENSG00000198231	DDX42	-0.343703	0.00667686	0.261632
ENSG00000124126	PREX1	-0.164597	0.301727	0.881616
ENSG00000124145	SDC4	0.016102	0.929337	0.992661
ENSG00000124151	NCOA3	-0.177895	0.310732	0.881616
ENSG00000124155	PIGT	0.0827141	0.554823	0.942645
ENSG00000124160	NCOA5	-0.123689	0.414645	0.904464
ENSG00000124172	ATP5E	0.0186983	0.912485	0.992233
ENSG00000124193	SRSF6	-0.17032	0.23349	0.836413
ENSG00000124198	ARFGEF2	-0.0277481	0.874942	0.985782
ENSG00000124201	ZNFX1	0.0755148	0.574038	0.946677
ENSG00000124207	CSE1L	-0.067879	0.645686	0.959178
ENSG00000124214	STAU1	-0.176336	0.196955	0.810396
ENSG00000124222	STX16	-0.0103388	0.963066	0.995514
ENSG00000101224	CDC25B	-0.342748	0.0141154	0.377338
ENSG00000124228	DDX27	0.0813197	0.575571	0.946972
ENSG00000124275	MTRR	-0.116824	0.548543	0.940606
ENSG00000124299	PEPD	0.144683	0.374046	0.896832
ENSG00000124333	VAMP7	0.106804	0.514456	0.932469
ENSG00000244038	DDOST	-0.342465	0.0088441	0.306879
ENSG00000124422	USP22	0.0275648	0.840684	0.980477
ENSG00000124486	USP9X	-0.0554797	0.740987	0.970797
ENSG00000124496	TRERF1	0.125802	0.485786	0.930973
ENSG00000124535	WRNIP1	0.0538806	0.681885	0.960599
ENSG00000124541	RRP36	0.12545	0.434366	0.91015
ENSG00000124562	SNRPC	0.196881	0.226333	0.836413
ENSG00000124570	SERPINB6	0.028432	0.837313	0.980477
ENSG00000124571	XPO5	-0.204651	0.221843	0.835262
ENSG00000124588	NQO2	-0.0105925	0.945146	0.994746
ENSG00000124702	KLHDC3	-0.191288	0.162783	0.778324
ENSG00000124733	MEA1	0.174027	0.249392	0.847364
ENSG00000104783	KCNN4	-0.341411	0.0213423	0.449066
ENSG00000124766	SOX4	0.0854761	0.670568	0.960505
ENSG00000124767	GLO1	0.113679	0.451859	0.916931
ENSG00000124782	RREB1	-0.209851	0.249271	0.847364
ENSG00000124783	SSR1	0.27705	0.0472344	0.570044
ENSG00000124789	NUP153	-0.0944394	0.634581	0.959178
ENSG00000124795	DEK	0.00682221	0.95476	0.994746
ENSG00000124831	LRRFIP1	0.0920955	0.591123	0.949317
ENSG00000124942	AHNAK	0.103328	0.504286	0.932134
ENSG00000125037	EMC3	0.0786819	0.584579	0.94799
ENSG00000125089	SH3TC1	0.256032	0.154571	0.771248
ENSG00000125107	CNOT1	-0.0931126	0.580796	0.946972
ENSG00000125148	MT2A	-0.160356	0.402031	0.898817
ENSG00000125166	GOT2	-0.10129	0.500708	0.932134
ENSG00000125257	ABCC4	0.275361	0.157235	0.775602
ENSG00000125304	TM9SF2	0.0323522	0.838396	0.980477
ENSG00000125347	IRF1	0.0435898	0.770283	0.970797
ENSG00000125354	SEPT6	0.08997	0.505361	0.932134
ENSG00000125356	NDUFA1	-0.0355093	0.81495	0.9747
ENSG00000125434	SLC25A35	0.0245233	0.892612	0.988374
ENSG00000125445	MRPS7	-0.0461673	0.745876	0.970797
ENSG00000125447	GGA3	-0.0870979	0.595695	0.950876
ENSG00000125449	ARMC7	0.312497	0.0626257	0.614314
ENSG00000125450	NUP85	-0.299913	0.151846	0.770007
ENSG00000125457	MIF4GD	-0.258075	0.0480003	0.571714
ENSG00000125458	NT5C	-0.11529	0.589345	0.949317
ENSG00000125503	PPP1R12C	-0.199147	0.367124	0.892898
ENSG00000125505	MBOAT7	0.0865337	0.486706	0.931192
[truncated: 3,275 more rows]

## Sheet: non-t(6;9)-Omacetaxine
Ensembl gene id	Gene name	log2FoldChange	pvalue	padj
ENSG00000000419	DPM1	0.140949	0.793983	0.894546
ENSG00000000457	SCYL3	0.0927335	0.897379	0.949835
ENSG00000000460	C1orf112	-0.152494	0.830127	0.915773
ENSG00000000938	FGR	-0.746957	0.395732	0.613159
ENSG00000001036	FUCA2	-0.318375	0.401526	0.619072
ENSG00000001084	GCLC	-0.17063	0.835535	0.917825
ENSG00000267523	AC008735.2	-3.88545	1.99586e-05	0.000543104
ENSG00000001461	NIPAL3	-0.163943	0.646932	0.804506
ENSG00000001497	LAS1L	-0.0271967	0.92598	0.964301
ENSG00000146918	NCAPG2	-3.8555	0.019801	0.0945532
ENSG00000149503	INCENP	-3.45041	4.2833e-05	0.000985578
ENSG00000002586	CD99	0.0465921	0.679048	0.825627
ENSG00000002822	MAD1L1	0.228463	0.500522	0.701538
ENSG00000176597	B3GNT5	-3.3104	6.30457e-06	0.000228522
ENSG00000075218	GTSE1	-2.85114	0.000155936	0.00270097
ENSG00000117724	CENPF	-2.73362	1.97837e-06	9.38026e-05
ENSG00000003147	ICA1	-0.0368392	0.928857	0.965789
ENSG00000003393	ALS2	-0.617089	0.446481	0.659985
ENSG00000164741	DLC1	-2.68928	0.00768554	0.0495549
ENSG00000003402	CFLAR	-0.19011	0.388497	0.605849
ENSG00000003436	TFPI	-0.511445	0.536857	0.729532
ENSG00000003509	NDUFAF7	0.218371	0.681119	0.826677
ENSG00000144554	FANCD2	-2.66405	0.00429798	0.0327777
ENSG00000004059	ARF5	-0.31487	0.286737	0.508096
ENSG00000166483	WEE1	-2.57035	3.20901e-05	0.000784537
ENSG00000161996	WDR90	-2.56288	0.000841272	0.00963154
ENSG00000004399	PLXND1	0.00621182	0.966379	0.981958
ENSG00000089057	SLC23A2	-2.53391	0.000402447	0.00548356
ENSG00000133619	KRBA1	-2.45431	0.0179893	0.0894983
ENSG00000004478	FKBP4	-0.0790528	0.649354	0.806367
ENSG00000004487	KDM1A	0.0986429	0.647851	0.804884
ENSG00000004534	RBM6	0.157532	0.412639	0.628975
ENSG00000004660	CAMKK1	-0.54671	0.456364	0.665892
ENSG00000174175	SELP	-2.43519	0.000266034	0.00402179
ENSG00000004779	NDUFAB1	0.13788	0.785377	0.889399
ENSG00000101544	ADNP2	-2.42773	0.00151327	0.0149543
ENSG00000101868	POLA1	-2.42108	0.00722078	0.0478317
ENSG00000169679	BUB1	-2.41991	0.000401726	0.00548169
ENSG00000005020	SKAP2	0.0135422	0.95629	0.977
ENSG00000221988	PPT2	-2.41281	0.00854167	0.0532465
ENSG00000104918	RETN	-2.41153	0.000813622	0.00938203
ENSG00000140548	ZNF710	-2.39017	0.00221819	0.0199276
ENSG00000005100	DHX33	0.133388	0.73271	0.860101
ENSG00000005156	LIG3	-0.262798	0.362015	0.582835
ENSG00000005175	RPAP3	0.440929	0.44381	0.657994
ENSG00000239305	RNF103	-2.37019	0.000652183	0.00794123
ENSG00000005189	REXO5	-0.228366	0.335626	0.559357
ENSG00000005194	CIAPIN1	-0.0906388	0.781794	0.887375
ENSG00000145882	PCYOX1L	-2.33442	2.59168e-05	0.000670567
ENSG00000005238	FAM214B	0.198007	0.620293	0.787253
ENSG00000005302	MSL3	-0.122809	0.70255	0.840089
ENSG00000155380	SLC16A1	-2.29718	0.0119491	0.0670925
ENSG00000162729	IGSF8	-2.28894	0.0264971	0.114254
ENSG00000111665	CDCA3	-2.20821	0.00384068	0.0301474
ENSG00000037757	MRI1	-2.20486	0.00402783	0.0312765
ENSG00000108854	SMURF2	-2.20178	0.0318711	0.129582
ENSG00000231864	AL807752.3	-2.19369	0.00121866	0.0128116
ENSG00000005700	IBTK	-0.0140799	0.957394	0.977598
ENSG00000005801	ZNF195	-0.0127223	0.97032	0.984264
ENSG00000102996	MMP15	-2.18768	0.00260642	0.0226147
ENSG00000172893	DHCR7	-2.18307	2.06657e-12	5.87908e-10
ENSG00000112984	KIF20A	-2.17753	0.0398984	0.150368
ENSG00000005882	PDK2	0.38811	0.296367	0.516962
ENSG00000186185	KIF18B	-2.17248	2.74116e-05	0.000699293
ENSG00000005889	ZFX	-0.499829	0.501403	0.702091
ENSG00000118217	ATF6	-2.16795	0.00166485	0.0161524
ENSG00000038382	TRIO	-2.15584	7.75947e-06	0.000267816
ENSG00000100281	HMGXB4	-2.15206	0.0371201	0.143114
ENSG00000172766	NAA16	-2.14877	0.000245401	0.0038206
ENSG00000224407	AL136988.1	-2.13224	0.000471331	0.00624098
ENSG00000006025	OSBPL7	0.291704	0.49503	0.697484
ENSG00000100350	FOXRED2	-2.13033	1.27688e-07	9.58985e-06
ENSG00000006125	AP2B1	0.197894	0.311899	0.534228
ENSG00000136243	NUPL2	-2.12529	0.00133329	0.0137397
ENSG00000110756	HPS5	-2.11743	0.0099523	0.0588364
ENSG00000163389	POGLUT1	-2.11513	0.0114959	0.0655274
ENSG00000006530	AGK	-0.781944	0.312249	0.534633
ENSG00000170340	B3GNT2	-2.11236	0.00743303	0.0485604
ENSG00000006625	GGCT	-0.454711	0.369391	0.588606
ENSG00000141424	SLC39A6	-2.09504	0.0084412	0.0528659
ENSG00000006652	IFRD1	-0.129879	0.753659	0.870887
ENSG00000181588	MEX3D	-2.08095	0.00267904	0.0231378
ENSG00000147050	KDM6A	-2.07043	0.0136929	0.0740779
ENSG00000275832	ARHGAP23	-2.06484	3.16122e-06	0.000133044
ENSG00000168497	CAVIN2	-2.048	0.0402635	0.1511
ENSG00000006756	ARSD	-0.195926	0.561813	0.747067
ENSG00000163635	ATXN7	-2.04612	0.0061263	0.0424455
ENSG00000006831	ADIPOR2	-0.256649	0.326497	0.550396
ENSG00000007047	MARK4	-0.0696706	0.814612	0.90694
ENSG00000007062	PROM1	0.0360205	0.915388	0.9587
ENSG00000256364	AC069234.2	-2.02418	0.0164464	0.084602
ENSG00000135250	SRPK2	-2.00933	0.0253944	0.111299
ENSG00000167912	AC090152.1	-2.00836	0.0147318	0.0780046
ENSG00000007237	GAS7	-0.00987364	0.968049	0.982597
ENSG00000183337	BCOR	-2.00528	0.00279207	0.023959
ENSG00000155393	HEATR3	-2.00478	0.00135137	0.0138804
ENSG00000066279	ASPM	-1.998	0.00840436	0.0527407
ENSG00000161692	DBF4B	-1.99609	0.00586605	0.0411588
ENSG00000135945	REV1	-1.99462	5.24625e-07	3.06765e-05
ENSG00000134690	CDCA8	-1.98083	0.000106105	0.00203288
ENSG00000107968	MAP3K8	-1.97528	0.00642746	0.0438844
ENSG00000168758	SEMA4C	-1.96318	0.000122286	0.00225988
ENSG00000108588	CCDC47	-1.95996	0.00063309	0.00777939
ENSG00000062598	ELMO2	-1.95642	0.00637716	0.0436638
ENSG00000232220	AC008440.2	-1.9557	0.000358912	0.00507437
ENSG00000007968	E2F2	0.058016	0.945852	0.972155
ENSG00000179542	SLITRK4	-1.94417	0.00531668	0.0383946
ENSG00000008083	JARID2	-0.0549425	0.821661	0.910714
ENSG00000119969	HELLS	-1.94164	0.0512446	0.17713
ENSG00000008226	DLEC1	0.0251875	0.949942	0.973799
ENSG00000162928	PEX13	-1.94158	0.0182004	0.0901666
ENSG00000008282	SYPL1	0.0407471	0.894249	0.948549
ENSG00000134444	KIAA1468	-1.93155	0.00877001	0.0542925
ENSG00000178202	KDELC2	-1.9287	0.000854525	0.0097122
ENSG00000008324	SS18L2	-0.0505781	0.90137	0.951241
ENSG00000275454	AC105020.6	-1.92071	0.00536258	0.038661
ENSG00000164104	HMGB2	-1.91409	1.0172e-23	4.77473e-20
ENSG00000038210	PI4K2B	-1.91113	0.000424125	0.00570442
ENSG00000008513	ST3GAL1	-0.0052845	0.98702	0.992099
ENSG00000204842	ATXN2	-1.89832	0.0020266	0.0186709
ENSG00000008838	MED24	0.260021	0.348361	0.569758
ENSG00000008853	RHOBTB2	0.232968	0.481635	0.688041
ENSG00000051180	RAD51	-1.89515	0.0588526	0.191976
ENSG00000272256	AC044849.2	-1.8871	0.0555282	0.185648
ENSG00000130589	HELZ2	-1.88586	0.0593386	0.192937
ENSG00000102221	JADE3	-1.87801	0.0172249	0.0870327
ENSG00000009335	UBE3C	-0.115907	0.76533	0.878547
ENSG00000009413	REV3L	-0.179078	0.706086	0.842386
ENSG00000145431	PDGFC	-1.87699	0.0250546	0.110567
ENSG00000196367	TRRAP	-1.87391	2.97536e-05	0.000742891
ENSG00000009844	VTA1	0.132445	0.569447	0.752317
ENSG00000254559	AC069287.2	-1.87105	0.00781332	0.0501771
ENSG00000010017	RANBP9	-0.0224258	0.938881	0.970195
ENSG00000171236	LRG1	-1.86427	0.0505658	0.175964
ENSG00000132359	RAP1GAP2	-1.85965	6.5218e-06	0.00023369
ENSG00000010244	ZNF207	-0.275079	0.293301	0.514101
ENSG00000142945	KIF2C	-1.85896	0.00383759	0.0301474
ENSG00000010270	STARD3NL	-0.412823	0.342449	0.564515
ENSG00000112759	SLC29A1	-1.85367	3.60221e-07	2.26963e-05
ENSG00000010295	IFFO1	-0.236747	0.457326	0.66657
ENSG00000010318	PHF7	0.0835107	0.880425	0.940322
ENSG00000010322	NISCH	0.102943	0.587633	0.766047
ENSG00000010327	STAB1	0.0471974	0.84265	0.920646
ENSG00000010361	FUZ	0.18231	0.465759	0.673471
ENSG00000259948	AC124068.1	-1.85365	0.0258688	0.11273
ENSG00000010539	ZNF200	-0.450719	0.432337	0.645891
ENSG00000198901	PRC1	-1.84744	0.0134319	0.0731429
ENSG00000145241	CENPC	-1.84602	0.00257678	0.0224196
ENSG00000111711	GOLT1B	-1.84084	0.0199364	0.0949362
ENSG00000135049	AGTPBP1	-1.8408	0.0181686	0.0901516
ENSG00000010810	FYN	-0.181648	0.551961	0.740978
ENSG00000130164	LDLR	-1.83548	0.00964876	0.0576754
ENSG00000011007	ELOA	0.100829	0.680265	0.826388
ENSG00000011009	LYPLA2	0.183698	0.512239	0.709251
ENSG00000237649	KIFC1	-1.82912	0.00497405	0.0365386
ENSG00000011028	MRC2	0.0399247	0.85339	0.925461
ENSG00000169992	NLGN2	-1.82151	0.023383	0.105742
ENSG00000198301	SDAD1	-1.80856	0.0056098	0.0399884
ENSG00000155008	APOOL	-1.78188	0.06707	0.208081
ENSG00000148110	MFSD14B	-1.77534	0.0232223	0.105167
ENSG00000112893	MAN2A1	-1.77133	0.00286569	0.0243256
ENSG00000183808	RBM12B	-1.76295	0.0414328	0.154048
ENSG00000011295	TTC19	0.0145187	0.943306	0.971252
ENSG00000117593	DARS2	-1.76042	0.031278	0.128158
ENSG00000011376	LARS2	-0.214476	0.632702	0.795432
ENSG00000011422	PLAUR	-0.209642	0.732863	0.860101
ENSG00000011451	WIZ	-0.0822173	0.768592	0.880412
ENSG00000185684	EP400NL	-1.75914	0.136276	0.322983
ENSG00000090776	EFNB1	-1.74755	0.0637118	0.201186
ENSG00000132640	BTBD3	-1.74191	0.0350698	0.137985
ENSG00000011523	CEP68	-0.105523	0.791541	0.893577
ENSG00000189060	H1F0	-1.73563	0.118031	0.295882
ENSG00000011638	TMEM159	0.130319	0.638726	0.799007
ENSG00000012048	BRCA1	-0.807882	0.292162	0.513059
ENSG00000109685	NSD2	-1.73507	1.22568e-09	1.95029e-07
ENSG00000012211	PRICKLE3	0.111503	0.901788	0.951555
ENSG00000143995	MEIS1	-1.73422	0.17173	0.371959
ENSG00000145335	SNCA	-1.7337	0.0627789	0.199246
ENSG00000085840	ORC1	-1.73054	0.000384161	0.00530369
ENSG00000251322	SHANK3	-1.72123	0.00753707	0.0491078
ENSG00000012983	MAP4K5	-0.212139	0.60608	0.777518
ENSG00000119397	CNTRL	-1.71092	2.80326e-06	0.000121838
ENSG00000103540	CCP110	-1.70899	0.0184481	0.0908659
ENSG00000145569	FAM105A	-1.70765	0.0555803	0.185756
ENSG00000092964	DPYSL2	-1.70678	0.00849864	0.053084
ENSG00000198168	SVIP	-1.70675	0.000435673	0.00582635
ENSG00000119326	CTNNAL1	-1.70519	0.11029	0.28414
ENSG00000013441	CLK1	-0.0923593	0.762998	0.876641
ENSG00000274211	SOCS7	-1.7025	4.63627e-05	0.00104771
ENSG00000139514	SLC7A1	-1.69938	1.85983e-05	0.000513531
ENSG00000131697	NPHP4	-1.69796	0.0251672	0.110655
ENSG00000175216	CKAP5	-1.69536	1.41392e-05	0.000414809
ENSG00000013583	HEBP1	-0.122513	0.631153	0.794211
ENSG00000013810	TACC3	0.186427	0.423627	0.63788
ENSG00000149231	CCDC82	-1.6921	0.00255309	0.0222548
ENSG00000014138	POLA2	-0.242626	0.379626	0.597463
ENSG00000014164	ZC3H3	0.189829	0.397872	0.615257
ENSG00000014216	CAPN1	-0.218689	0.285688	0.50674
ENSG00000160271	RALGDS	-1.68824	0.0687506	0.211435
ENSG00000014824	SLC30A9	-0.018632	0.951601	0.974862
ENSG00000014919	COX15	-0.192761	0.461114	0.67031
ENSG00000120868	APAF1	-1.68389	0.102339	0.271323
ENSG00000015153	YAF2	-0.832007	0.280729	0.501718
ENSG00000015171	ZMYND11	-0.540579	0.337703	0.560232
ENSG00000015285	WAS	0.0715031	0.692398	0.834733
ENSG00000108055	SMC3	-1.67825	3.19926e-06	0.000133044
ENSG00000143398	PIP5K1A	-1.67225	5.46487e-05	0.0011987
ENSG00000015676	NUDCD3	0.184998	0.496213	0.698015
ENSG00000016864	GLT8D1	-0.412964	0.720828	0.852176
ENSG00000061987	MON2	-1.67161	0.0477402	0.169254
ENSG00000017483	SLC38A5	-0.00854095	0.984369	0.990804
ENSG00000144354	CDCA7	-1.66804	0.0608981	0.19539
ENSG00000213463	SYNJ2BP	-1.6651	0.040891	0.152676
ENSG00000018510	AGPS	0.294969	0.410988	0.627783
ENSG00000153207	AHCTF1	-1.66434	0.0198568	0.0946753
ENSG00000184602	SNN	-1.66307	0.011971	0.067175
ENSG00000166479	TMX3	-1.66239	0.00462626	0.0345791
ENSG00000154451	GBP5	-1.66101	0.0173635	0.0873573
ENSG00000019991	HGF	1.87543	0.299641	0.520064
ENSG00000019995	ZRANB1	-0.28067	0.397632	0.615172
ENSG00000137563	GGH	-1.65827	1.032e-05	0.00033524
ENSG00000101639	CEP192	-1.65515	0.0747677	0.223044
ENSG00000198826	ARHGAP11A	-1.6535	0.00022158	0.00352963
ENSG00000020633	RUNX3	0.182592	0.559686	0.745507
ENSG00000185046	ANKS1B	-1.65136	0.0260374	0.112871
ENSG00000198363	ASPH	-1.64819	0.0040083	0.0311506
ENSG00000021574	SPAST	-0.306046	0.529252	0.723444
ENSG00000138459	SLC35A5	-1.64499	0.0423942	0.156261
ENSG00000165102	HGSNAT	-1.64404	0.000335697	0.00482622
ENSG00000161682	FAM171A2	-1.6434	0.0547119	0.184115
ENSG00000196126	HLA-DRB1	-1.6408	0.0824256	0.237657
ENSG00000022567	SLC45A4	0.777921	0.336688	0.559896
ENSG00000092621	PHGDH	-1.63849	0.00165082	0.0160433
ENSG00000155850	SLC26A2	-1.63745	0.0621706	0.198295
ENSG00000023041	ZDHHC6	0.219983	0.489821	0.694552
ENSG00000023171	GRAMD1B	0.180099	0.753723	0.870887
ENSG00000023191	RNH1	-0.0340986	0.88715	0.944495
ENSG00000134109	EDEM1	-1.63372	3.60214e-05	0.000850859
ENSG00000023287	RB1CC1	-0.265467	0.465712	0.673471
ENSG00000023318	ERP44	-0.0896232	0.797557	0.896815
ENSG00000023330	ALAS1	-0.676016	0.363204	0.583963
ENSG00000184635	ZNF93	-1.63339	0.000597746	0.00745664
ENSG00000023697	DERA	-0.303753	0.461177	0.67031
ENSG00000165156	ZHX1	-1.63183	0.00204285	0.0187654
ENSG00000050130	JKAMP	-1.63146	0.00475625	0.0352421
ENSG00000084731	KIF3C	-1.62734	0.0714189	0.216774
ENSG00000074266	EED	-1.62691	0.0292343	0.122524
ENSG00000024422	EHD2	0.30608	0.661374	0.813561
ENSG00000110400	NECTIN1	-1.62575	0.0136998	0.0740779
ENSG00000135451	TROAP	-1.61771	0.0344729	0.136438
ENSG00000025156	HSF2	-0.503295	0.37765	0.595361
ENSG00000272711	AC019069.1	-1.61391	0.0943219	0.257249
ENSG00000148218	ALAD	-1.60754	2.94364e-05	0.000739271
ENSG00000236200	KDM4A-AS1	-1.6069	0.0381411	0.145756
ENSG00000259881	AC092384.2	-1.60193	0.0183949	0.0906862
ENSG00000025772	TOMM34	-0.0738121	0.802016	0.899239
ENSG00000159423	ALDH4A1	-1.60131	0.01183	0.0667275
ENSG00000115808	STRN	-1.59972	0.0323904	0.131113
ENSG00000026025	VIM	-0.119434	0.415795	0.631698
ENSG00000026103	FAS	-0.265283	0.723863	0.854366
ENSG00000269151	AC007193.3	-1.59758	0.0508452	0.176592
ENSG00000196782	MAML3	-1.59668	0.024742	0.109692
ENSG00000027075	PRKCH	0.00347854	0.99477	0.996894
ENSG00000259407	AC021739.2	-1.59609	0.0350969	0.137985
ENSG00000065243	PKN2	-1.59543	0.0464333	0.166041
ENSG00000140534	TICRR	-1.58838	0.00094123	0.0104079
ENSG00000160190	SLC37A1	-1.57927	4.4787e-07	2.76449e-05
ENSG00000173221	GLRX	-1.57763	0.00338127	0.0274079
ENSG00000130779	CLIP1	-1.57617	0.0559437	0.186572
ENSG00000111276	CDKN1B	-1.57483	0.000881344	0.00992094
ENSG00000028310	BRD9	-0.250426	0.49233	0.695752
ENSG00000028528	SNX1	-0.0970777	0.727669	0.856811
ENSG00000028839	TBPL1	-0.390655	0.62331	0.789375
ENSG00000204604	ZNF468	-1.57112	0.0564792	0.187558
ENSG00000029364	SLC39A9	-0.21183	0.535938	0.72908
ENSG00000227345	PARG	-1.56428	0.0303472	0.125396
ENSG00000029993	HMGB3	-0.0388459	0.888522	0.944992
ENSG00000147133	TAF1	-1.55967	0.00284843	0.024244
ENSG00000198799	LRIG2	-1.55902	0.0554764	0.185607
ENSG00000030582	GRN	0.00967235	0.956275	0.977
ENSG00000112282	MED23	-1.55701	0.0659104	0.205927
ENSG00000104228	TRIM35	-1.55338	0.0369435	0.142609
ENSG00000177868	SVBP	-1.55278	0.0519173	0.178303
ENSG00000157554	ERG	-1.55215	3.5042e-05	0.00083483
ENSG00000176102	CSTF3	-1.54892	0.03606	0.140469
ENSG00000137504	CREBZF	-1.54815	0.000404118	0.00549834
ENSG00000150093	ITGB1	-1.5477	0.000240605	0.00377096
ENSG00000136868	SLC31A1	-1.54181	0.0282419	0.119484
ENSG00000033050	ABCF2	0.0878377	0.831542	0.91615
ENSG00000033100	CHPF2	-0.376156	0.391329	0.609051
ENSG00000033170	FUT8	-0.131365	0.831989	0.916324
ENSG00000176018	LYSMD3	-1.54112	0.0352678	0.138359
ENSG00000122952	ZWINT	-1.54086	0.136308	0.322983
ENSG00000033627	ATP6V0A1	0.477303	0.353544	0.574979
ENSG00000033800	PIAS1	-0.0778386	0.705755	0.842205
ENSG00000034053	APBA2	0.209593	0.784242	0.888802
ENSG00000034152	MAP2K3	-0.161152	0.422341	0.63704
ENSG00000156531	PHF6	-1.53882	0.0462453	0.165532
ENSG00000034713	GABARAPL2	0.209812	0.361446	0.582233
ENSG00000035115	SH3YL1	-0.514782	0.337663	0.560232
ENSG00000174233	ADCY6	-1.53681	0.0408608	0.152647
ENSG00000035403	VCL	-0.314861	0.496039	0.698015
ENSG00000131747	TOP2A	-1.53632	2.77302e-08	2.76948e-06
ENSG00000164933	SLC25A32	-1.53525	0.0474839	0.168735
ENSG00000035862	TIMP2	0.0406373	0.822054	0.910885
ENSG00000035928	RFC1	-0.165598	0.696048	0.836363
ENSG00000036054	TBC1D23	-0.0957848	0.844511	0.92125
ENSG00000036257	CUL3	-0.0599038	0.835054	0.917757
ENSG00000113569	NUP155	-1.53439	0.000124888	0.00229442
ENSG00000036549	ZZZ3	0.249305	0.434581	0.647904
ENSG00000149418	ST14	-1.53	0.00108789	0.0116455
ENSG00000179820	MYADM	-1.52982	0.000638376	0.00780348
ENSG00000037637	FBXO42	0.0536237	0.874375	0.937593
ENSG00000136518	ACTL6A	-1.52972	0.00103455	0.0112535
ENSG00000101003	GINS1	-1.52761	0.0396517	0.149498
ENSG00000038219	BOD1L1	-0.227501	0.475156	0.682283
ENSG00000071537	SEL1L	-1.52703	0.000527726	0.00680535
ENSG00000076248	UNG	-1.52638	7.14722e-07	3.94695e-05
ENSG00000168488	ATXN2L	-1.52335	1.93667e-07	1.30483e-05
ENSG00000038532	CLEC16A	0.119007	0.80049	0.898411
ENSG00000039123	SKIV2L2	0.15627	0.564439	0.748875
ENSG00000114933	INO80D	-1.52134	0.0308275	0.127045
ENSG00000145734	BDP1	-1.51899	0.00601431	0.0419482
ENSG00000040275	SPDL1	-0.261806	0.722732	0.853796
ENSG00000138018	SELENOI	-1.51829	0.00157487	0.015433
ENSG00000040487	PQLC2	-0.328673	0.330208	0.553523
ENSG00000040531	CTNS	0.00806961	0.984359	0.990804
ENSG00000171502	COL24A1	-1.51722	0.00452417	0.0340874
ENSG00000040633	PHF23	-0.0874343	0.766703	0.879391
ENSG00000117222	RBBP5	-1.51512	0.10881	0.281718
ENSG00000019485	PRDM11	-1.51336	0.0458441	0.164709
ENSG00000090520	DNAJB11	-1.51228	6.53381e-05	0.00137225
ENSG00000173848	NET1	-1.50712	0.00943848	0.0568003
ENSG00000157593	SLC35B2	-1.50122	0.0259686	0.112815
ENSG00000042445	RETSAT	0.371659	0.49145	0.695694
ENSG00000180357	ZNF609	-1.50105	9.05109e-05	0.00179265
ENSG00000021762	OSBPL5	-1.49954	0.0101974	0.0599832
ENSG00000145730	PAM	-1.49921	0.000516482	0.0067157
ENSG00000043093	DCUN1D1	-0.0854402	0.800472	0.898411
ENSG00000116406	EDEM3	-1.49181	0.00196375	0.0182713
ENSG00000043462	LCP2	0.0923846	0.660081	0.812488
ENSG00000043514	TRIT1	-0.100771	0.84422	0.921188
ENSG00000044090	CUL7	-0.391406	0.341197	0.563819
ENSG00000044115	CTNNA1	-0.307529	0.341485	0.563932
ENSG00000044446	PHKA2	0.167628	0.465209	0.673471
ENSG00000174059	CD34	-1.48695	0.0112399	0.0644989
ENSG00000046651	OFD1	-0.0780313	0.900987	0.951137
ENSG00000166681	BEX3	-1.48632	0.00143686	0.0144537
ENSG00000107672	NSMCE4A	-1.48465	0.0573942	0.189391
ENSG00000047249	ATP6V1H	0.00372602	0.991235	0.994945
ENSG00000137337	MDC1	-1.47933	0.000199189	0.00326351
ENSG00000088325	TPX2	-1.47893	1.33889e-11	3.49154e-09
ENSG00000128915	ICE2	-1.47813	0.0599694	0.193981
ENSG00000092931	MFSD11	-1.47538	1.94585e-07	1.30483e-05
ENSG00000047578	KIAA0556	-0.41245	0.365782	0.5862
ENSG00000183718	TRIM52	-1.47476	0.0373457	0.143702
ENSG00000047621	C12orf4	-0.479424	0.564544	0.748875
ENSG00000047644	WWC3	0.393359	0.44843	0.661096
ENSG00000047662	FAM184B	0.0106135	0.984381	0.990804
ENSG00000047849	MAP4	-0.146295	0.484672	0.69077
ENSG00000112941	PAPD7	-1.46854	0.000211729	0.00341531
ENSG00000159086	PAXBP1	-1.46689	1.88443e-05	0.000515774
ENSG00000048162	NOP16	-0.116575	0.59591	0.771883
ENSG00000122861	PLAU	-1.46603	0.000414842	0.00560384
ENSG00000048405	ZNF800	-0.207182	0.66418	0.815288
ENSG00000048471	SNX29	-0.106096	0.788422	0.891556
ENSG00000155657	TTN	-1.4651	0.0669621	0.208021
ENSG00000175274	TP53I11	-1.46378	0.00663708	0.0448911
ENSG00000048707	VPS13D	-0.458331	0.293989	0.514439
ENSG00000048740	CELF2	-0.0974188	0.62657	0.791049
ENSG00000048828	FAM120A	-0.150931	0.518965	0.71532
ENSG00000087338	GMCL1	-1.46345	0.0324291	0.131113
ENSG00000204308	RNF5	-1.46053	0.126602	0.310404
ENSG00000049239	H6PD	-0.222552	0.44488	0.658552
ENSG00000049245	VAMP3	-0.332636	0.407025	0.624371
ENSG00000257167	TMPO-AS1	-1.4596	0.00585925	0.0411418
ENSG00000049449	RCN1	0.0978271	0.700878	0.839427
ENSG00000049541	RFC2	0.0121063	0.958718	0.978102
ENSG00000049618	ARID1B	-0.184643	0.413313	0.629491
ENSG00000049656	CLPTM1L	0.0472726	0.74413	0.865554
ENSG00000099194	SCD	-1.4579	2.15577e-08	2.43836e-06
ENSG00000164105	SAP30	-1.45698	0.0160555	0.0832389
ENSG00000198740	ZNF652	-1.45664	0.0433165	0.15854
ENSG00000050393	MCUR1	-0.111596	0.734245	0.860941
ENSG00000052802	MSMO1	-1.45534	0.0292793	0.122557
ENSG00000105011	ASF1B	-1.45285	0.00016708	0.00280736
ENSG00000197442	MAP3K5	-1.44859	0.0321979	0.130516
ENSG00000051009	FAM160A2	-0.217804	0.507841	0.707151
ENSG00000051108	HERPUD1	-0.336271	0.710678	0.845118
ENSG00000051128	HOMER3	-0.0671014	0.683781	0.829265
ENSG00000213341	CHUK	-1.44781	0.0423891	0.156261
ENSG00000051382	PIK3CB	0.1404	0.625196	0.790271
ENSG00000110583	NAA40	-1.4447	0.000701202	0.00838032
ENSG00000198879	SFMBT2	-1.44429	0.125252	0.308037
ENSG00000051620	HEBP2	-0.0407422	0.863175	0.931007
ENSG00000172869	DMXL1	-1.44313	0.0523286	0.179096
ENSG00000196209	SIRPB2	-1.4429	0.021344	0.0992532
ENSG00000144224	UBXN4	-1.44288	0.222965	0.43778
ENSG00000010610	CD4	-1.43865	0.00929435	0.0562212
ENSG00000262477	AC021224.1	-1.43744	0.00626325	0.0431714
ENSG00000053254	FOXN3	0.0405148	0.898231	0.949938
ENSG00000262429	AC004771.4	-1.43697	0.0677934	0.209564
ENSG00000137210	TMEM14B	-1.43652	0.0388519	0.147192
ENSG00000111602	TIMELESS	-1.43527	3.60718e-05	0.000850859
ENSG00000053770	AP5M1	0.251515	0.329794	0.553137
ENSG00000053900	ANAPC4	-0.126377	0.878921	0.939785
ENSG00000053918	KCNQ1	-0.14687	0.785665	0.88951
ENSG00000160285	LSS	-1.43448	7.29765e-05	0.0014926
ENSG00000105281	SLC1A5	-1.43386	1.13299e-05	0.000360558
ENSG00000011478	QPCTL	-1.43346	0.0121536	0.0679562
ENSG00000115306	SPTBN1	-1.43249	0.00471929	0.0350789
ENSG00000054277	OPN3	-0.347082	0.422162	0.636979
ENSG00000165417	GTF2A1	-1.43145	0.0569892	0.188518
ENSG00000167646	DNAAF3	-1.42826	0.155985	0.351424
ENSG00000270629	NBPF14	-1.42678	0.0322318	0.130597
ENSG00000148773	MKI67	-1.42675	1.29163e-05	0.000388649
ENSG00000184402	SS18L1	-1.42633	0.00395429	0.0308541
ENSG00000055044	NOP58	-0.00633436	0.979069	0.988483
ENSG00000163539	CLASP2	-1.42322	0.0597389	0.19359
ENSG00000055130	CUL1	0.0522942	0.907271	0.954826
ENSG00000055147	FAM114A2	0.14446	0.671669	0.820405
ENSG00000055163	CYFIP2	0.168533	0.640756	0.8002
ENSG00000055208	TAB2	0.067495	0.830578	0.915775
ENSG00000055211	GINM1	-0.360443	0.420988	0.636021
ENSG00000197857	ZNF44	-1.42312	0.0496712	0.173998
ENSG00000059588	TARBP1	-1.42307	0.0724725	0.218629
ENSG00000188404	SELL	-1.42084	6.26234e-11	1.36723e-08
ENSG00000176444	CLK2	-1.4207	2.57804e-05	0.000670434
ENSG00000055950	MRPL43	0.0319014	0.90701	0.954811
ENSG00000056050	HPF1	-0.105511	0.90585	0.953804
ENSG00000056097	ZFR	0.00745273	0.984052	0.990804
ENSG00000056586	RC3H2	-0.326773	0.680963	0.826677
ENSG00000056972	TRAF3IP2	0.26121	0.680804	0.826615
ENSG00000134824	FADS2	-1.41985	1.06005e-10	2.1174e-08
ENSG00000057608	GDI2	0.0118338	0.942394	0.971252
ENSG00000057663	ATG5	-0.0540255	0.88928	0.945073
ENSG00000116830	TTF2	-1.41775	0.0458318	0.164709
ENSG00000184557	SOCS3	-1.41593	2.92959e-08	2.89506e-06
ENSG00000058091	CDK14	-0.443981	0.369656	0.58889
ENSG00000097007	ABL1	-1.41492	0.000277702	0.00413821
ENSG00000106392	C1GALT1	-1.41468	0.132919	0.318418
ENSG00000042088	TDP1	-1.41416	0.000546324	0.00699712
ENSG00000120837	NFYB	-1.41249	9.38805e-05	0.00183615
ENSG00000141956	PRDM15	-1.41119	0.0865148	0.244051
ENSG00000117906	RCN2	-1.40919	0.00294145	0.0247662
ENSG00000058799	YIPF1	0.175453	0.598916	0.773118
ENSG00000158615	PPP1R15B	-1.40869	0.000899752	0.010066
ENSG00000059122	FLYWCH1	0.102008	0.665727	0.815694
ENSG00000115540	MOB4	-1.40632	0.0974575	0.26276
ENSG00000172322	CLEC12A	-1.40509	4.45839e-05	0.00101591
ENSG00000198498	TMA16	-1.40472	0.0336979	0.134849
ENSG00000146587	RBAK	-1.40332	0.00451731	0.034063
ENSG00000149485	FADS1	-1.40225	2.88673e-06	0.000124888
ENSG00000059691	GATB	0.223739	0.561409	0.746886
ENSG00000059728	MXD1	0.194262	0.464235	0.672464
ENSG00000059804	SLC2A3	-0.27554	0.304995	0.525856
ENSG00000059915	PSD	0.433277	0.45118	0.663259
ENSG00000060069	CTDP1	0.0365656	0.878693	0.939785
ENSG00000060138	YBX3	-0.181532	0.368818	0.588414
ENSG00000281103	TRG-AS1	-1.40177	0.0116911	0.0661335
ENSG00000164611	PTTG1	-1.40155	0.0668514	0.207746
ENSG00000040341	STAU2	-1.40014	0.0540017	0.182686
ENSG00000115232	ITGA4	-1.3969	0.0757332	0.224995
ENSG00000172943	PHF8	-1.39642	0.0676944	0.209327
ENSG00000115687	PASK	-1.39457	0.0768445	0.227504
ENSG00000114770	ABCC5	-1.39421	0.0928586	0.254676
ENSG00000060971	ACAA1	0.119447	0.661387	0.813561
ENSG00000060982	BCAT1	-0.222284	0.549509	0.739507
ENSG00000061273	HDAC7	-0.226667	0.344869	0.566809
ENSG00000061794	MRPS35	0.132693	0.560522	0.746092
ENSG00000061936	SFSWAP	0.163328	0.590223	0.768092
ENSG00000111731	C2CD5	-1.39341	0.074755	0.223044
ENSG00000129636	ITFG1	-1.39123	0.0166424	0.0851509
ENSG00000062194	GPBP1	-0.213538	0.488093	0.693438
ENSG00000172262	ZNF131	-1.39047	0.0166882	0.0853034
ENSG00000062524	LTK	-0.430764	0.539596	0.731584
ENSG00000084234	APLP2	-1.38718	2.85015e-05	0.000725127
ENSG00000181409	AATK	-1.38702	0.0886746	0.248166
ENSG00000178295	GEN1	-1.38538	0.00418549	0.0321813
ENSG00000103489	XYLT1	-1.38511	0.00902384	0.0552615
ENSG00000062822	POLD1	-0.321962	0.339815	0.562246
ENSG00000063046	EIF4B	-0.0446065	0.782249	0.887573
ENSG00000063169	BICRA	-0.214417	0.546587	0.737009
ENSG00000063176	SPHK2	0.262339	0.411186	0.627882
ENSG00000104549	SQLE	-1.38478	0.0381468	0.145756
ENSG00000063180	CA11	-0.0828878	0.924647	0.963713
ENSG00000129534	MIS18BP1	-1.38432	0.0177585	0.0886792
ENSG00000253645	AC108863.1	-1.38299	0.0680151	0.209972
ENSG00000122025	FLT3	-1.37559	0.00145071	0.0144732
ENSG00000176105	YES1	-1.36937	0.0356411	0.139137
ENSG00000063438	AHRR	-0.0335315	0.964056	0.981037
ENSG00000137804	NUSAP1	-1.36758	0.00182954	0.0172699
ENSG00000063601	MTMR1	-0.515391	0.548169	0.738722
ENSG00000063660	GPC1	0.113576	0.75701	0.873254
ENSG00000063761	ADCK1	0.473353	0.377457	0.595158
ENSG00000010292	NCAPD2	-1.36747	0.000241615	0.00377417
ENSG00000074696	HACD3	-1.36746	0.0134169	0.0731038
ENSG00000145088	EAF2	-1.3647	0.00051869	0.0067165
ENSG00000064102	INTS13	-0.283994	0.552784	0.741127
ENSG00000131844	MCCC2	-1.3627	0.225967	0.440486
ENSG00000117394	SLC2A1	-1.36205	0.153093	0.347746
ENSG00000064225	ST3GAL6	0.404438	0.408483	0.62579
ENSG00000064393	HIPK2	-0.00407636	0.992621	0.99591
ENSG00000064419	TNPO3	-0.725254	0.299344	0.519838
ENSG00000097046	CDC7	-1.3617	0.000439864	0.00587403
ENSG00000064545	TMEM161A	0.291971	0.697349	0.837712
ENSG00000198951	NAGA	-1.35733	6.82153e-06	0.000242578
ENSG00000183077	AFMID	-1.35683	0.00811366	0.0514669
ENSG00000064607	SUGP2	-0.140951	0.548353	0.738722
ENSG00000152223	EPG5	-1.35432	9.95183e-05	0.00193304
ENSG00000163104	SMARCAD1	-1.35372	0.0014404	0.0144537
ENSG00000165097	KDM1B	-1.35369	0.0227548	0.1037
ENSG00000100162	CENPM	-1.35321	0.219893	0.433598
ENSG00000064726	BTBD1	-0.325847	0.300213	0.520672
ENSG00000140474	ULK3	-1.35292	0.184958	0.389679
ENSG00000111885	MAN1A1	-1.35159	0.00248795	0.0218289
ENSG00000136295	TTYH3	-1.34971	1.22667e-05	0.000371737
ENSG00000064961	HMG20B	0.014838	0.918718	0.960459
ENSG00000064995	TAF11	0.0578315	0.896234	0.949751
ENSG00000115020	PIKFYVE	-1.3431	0.000880875	0.00992094
ENSG00000198393	ZNF26	-1.34302	0.0735542	0.220968
ENSG00000065029	ZNF76	-0.204227	0.616014	0.784474
ENSG00000082805	ERC1	-1.34009	0.0932704	0.255656
ENSG00000183826	BTBD9	-1.33745	0.0922317	0.253473
ENSG00000170802	FOXN2	-1.33564	0.0843923	0.240658
ENSG00000065135	GNAI3	-0.188069	0.340013	0.562375
ENSG00000065150	IPO5	0.159678	0.374312	0.592972
ENSG00000184164	CRELD2	-1.33538	3.09192e-05	0.000761861
ENSG00000275342	PRAG1	-1.33481	0.113771	0.290011
ENSG00000123374	CDK2	-1.33363	5.37731e-05	0.00118225
ENSG00000153179	RASSF3	-1.33344	0.000722675	0.00855819
ENSG00000065308	TRAM2	-0.784965	0.33734	0.560166
ENSG00000162676	GFI1	-1.33316	1.20012e-05	0.000368193
ENSG00000177200	CHD9	-1.33271	0.00240566	0.0212712
ENSG00000164109	MAD2L1	-1.33239	0.00968889	0.057752
ENSG00000065491	TBC1D22B	-0.343276	0.528239	0.72227
ENSG00000065518	NDUFB4	0.26489	0.444177	0.658185
ENSG00000112312	GMNN	-1.33118	0.0133677	0.0730553
ENSG00000065548	ZC3H15	0.113735	0.599943	0.77345
ENSG00000065559	MAP2K4	0.350828	0.367384	0.587494
ENSG00000154839	SKA1	-1.32976	0.0574398	0.189448
ENSG00000120071	KANSL1	-1.3295	0.00549354	0.0393389
ENSG00000065615	CYB5R4	-0.0480457	0.85853	0.928023
ENSG00000065665	SEC61A2	-0.518466	0.299122	0.519838
ENSG00000065675	PRKCQ	0.0528331	0.937962	0.969672
ENSG00000124275	MTRR	-1.32899	0.00244058	0.0214735
ENSG00000066855	MTFR1	-1.32852	0.0011587	0.0122914
ENSG00000141570	CBX8	-1.32848	0.0740922	0.221997
ENSG00000198176	TFDP1	-1.32805	2.53052e-05	0.000659903
ENSG00000065911	MTHFD2	-0.0175334	0.953867	0.975904
ENSG00000065923	SLC9A7	-0.344835	0.508987	0.707276
ENSG00000065970	FOXJ2	-0.0818033	0.879912	0.940142
ENSG00000132694	ARHGEF11	-1.327	0.225646	0.440134
ENSG00000066027	PPP2R5A	0.223734	0.294553	0.51485
ENSG00000141279	NPEPPS	-1.32642	0.000289843	0.00430546
ENSG00000066056	TIE1	0.194399	0.684748	0.830116
ENSG00000124641	MED20	-1.32466	0.061243	0.196095
ENSG00000140044	JDP2	-1.32218	0.0128273	0.070744
ENSG00000063244	U2AF2	-1.32183	1.01159e-10	2.06452e-08
ENSG00000066136	NFYC	0.231082	0.444312	0.658185
ENSG00000115760	BIRC6	-1.32153	0.00530538	0.0383425
ENSG00000066294	CD84	-0.319862	0.35687	0.578066
ENSG00000091651	ORC6	-1.32058	0.0269581	0.115774
ENSG00000125388	GRK4	-1.31957	0.174695	0.375667
ENSG00000066379	ZNRD1	-0.0709464	0.83639	0.917825
ENSG00000108679	LGALS3BP	-1.31743	0.0140873	0.0757023
ENSG00000066427	ATXN3	0.275987	0.384255	0.601606
ENSG00000066455	GOLGA5	-0.557007	0.507933	0.707174
ENSG00000066557	LRRC40	0.415166	0.301271	0.521736
ENSG00000066583	ISOC1	-0.709708	0.319746	0.543112
ENSG00000124406	ATP8A1	-1.31671	0.00926323	0.0561778
ENSG00000159314	ARHGAP27	-1.31236	1.2258e-05	0.000371737
ENSG00000084774	CAD	-1.31175	0.00022474	0.0035683
ENSG00000196975	ANXA4	-1.31168	0.074512	0.222706
ENSG00000146574	CCZ1B	-1.30334	0.025308	0.110972
ENSG00000066926	FECH	-0.789238	0.306505	0.527376
ENSG00000143401	ANP32E	-1.30241	7.38502e-09	9.76487e-07
ENSG00000268199	AC010335.1	-1.30006	0.104407	0.27489
ENSG00000078070	MCCC1	-1.29993	0.0672361	0.208374
ENSG00000067066	SP100	-0.00594001	0.983412	0.990694
ENSG00000067082	KLF6	0.364567	0.412098	0.628661
ENSG00000067113	PLPP1	0.0218427	0.954679	0.976098
ENSG00000111666	CHPT1	-1.29795	0.0336726	0.134805
ENSG00000165480	SKA3	-1.29613	0.134058	0.320401
ENSG00000059573	ALDH18A1	-1.29599	0.000661737	0.00803672
ENSG00000125772	GPCPD1	-1.29388	0.000681275	0.00821029
ENSG00000171208	NETO2	-1.29258	0.000580016	0.0072916
ENSG00000139620	KANSL2	-1.29077	0.090281	0.250313
ENSG00000067369	TP53BP1	-0.243317	0.395816	0.613188
ENSG00000067560	RHOA	-0.0473019	0.660917	0.813196
ENSG00000067596	DHX8	0.225051	0.470018	0.677484
ENSG00000113369	ARRDC3	-1.2905	0.0572186	0.189138
ENSG00000148019	CEP78	-1.29008	0.0823274	0.237593
ENSG00000174437	ATP2A2	-1.28784	0.00054992	0.00701447
ENSG00000067900	ROCK1	0.0846375	0.778969	0.88613
ENSG00000067955	CBFB	-0.0960063	0.811053	0.905168
ENSG00000068024	HDAC4	0.043156	0.918924	0.960567
ENSG00000068028	RASSF1	-0.0179417	0.944261	0.971512
ENSG00000136802	LRRC8A	-1.28681	0.0217769	0.10076
ENSG00000068097	HEATR6	-0.0515828	0.904815	0.953249
ENSG00000138160	KIF11	-1.28624	0.0168227	0.0857859
ENSG00000068305	MEF2A	0.333727	0.334854	0.558765
ENSG00000178904	DPY19L3	-1.28515	0.0179525	0.0894374
ENSG00000068323	TFE3	0.158421	0.443158	0.657246
ENSG00000068354	TBC1D25	0.149543	0.662737	0.814261
ENSG00000106462	EZH2	-1.28474	0.0204978	0.0969437
ENSG00000068383	INPP5A	0.247434	0.540723	0.732406
ENSG00000114030	KPNA1	-1.2822	0.00878563	0.0542925
ENSG00000184117	NIPSNAP1	-1.28219	0.219728	0.433453
ENSG00000068438	FTSJ1	-0.138017	0.687024	0.832117
ENSG00000068489	PRR11	-0.445438	0.333989	0.557585
ENSG00000134294	SLC38A2	-1.28158	5.2662e-05	0.00116327
ENSG00000156162	DPY19L4	-1.28076	0.0039739	0.0309601
ENSG00000068724	TTC7A	-0.146707	0.423345	0.637784
ENSG00000068745	IP6K2	-0.252871	0.325886	0.549563
ENSG00000068784	SRBD1	0.145723	0.725921	0.855533
ENSG00000135476	ESPL1	-1.28022	0.00485831	0.0358568
ENSG00000273559	CWC25	-1.27722	0.00149447	0.014831
ENSG00000068878	PSME4	0.11938	0.596269	0.771955
ENSG00000166482	MFAP4	-1.27598	0.0224286	0.102512
ENSG00000068912	ERLEC1	-0.307969	0.37621	0.59419
ENSG00000069020	MAST4	0.0511326	0.948335	0.973444
ENSG00000069248	NUP133	0.207062	0.52605	0.72045
ENSG00000069275	NUCKS1	-0.113173	0.503727	0.704557
ENSG00000128731	HERC2	-1.27541	6.2525e-06	0.000227513
ENSG00000069345	DNAJA2	0.220951	0.557015	0.744022
ENSG00000147130	ZMYM3	-1.27508	0.00138342	0.0141476
ENSG00000069424	KCNAB2	-0.0219222	0.877852	0.939742
ENSG00000164151	ICE1	-1.2735	0.0183205	0.0905702
ENSG00000069869	NEDD4	0.00293014	0.994564	0.996839
ENSG00000069943	PIGB	0.269326	0.580431	0.760621
ENSG00000196678	ERI2	-1.27329	0.0301259	0.124866
ENSG00000146094	DOK3	-1.27294	0.000396499	0.00543406
ENSG00000135269	TES	-1.2716	0.0115556	0.0657876
ENSG00000069998	HDHD5	-0.0626164	0.825468	0.912457
ENSG00000070010	UFD1	-0.163599	0.455899	0.665834
ENSG00000176890	TYMS	-1.27143	0.00120767	0.0127219
ENSG00000070061	ELP1	-0.467279	0.319896	0.543227
ENSG00000070081	NUCB2	-0.196909	0.515404	0.711666
ENSG00000070190	DAPP1	0.451719	0.377196	0.595077
ENSG00000070214	SLC44A1	-0.0410064	0.871596	0.936024
ENSG00000044574	HSPA5	-1.26619	9.62063e-08	7.65411e-06
ENSG00000020256	ZFP64	-1.26481	0.0628117	0.199282
ENSG00000070367	EXOC5	0.100348	0.738513	0.862656
ENSG00000138600	SPPL2A	-1.26374	0.13014	0.314797
ENSG00000106617	PRKAG2	-1.26165	0.0538315	0.182312
ENSG00000070423	RNF126	0.0786874	0.743189	0.864971
ENSG00000115840	SLC25A12	-1.26164	0.00830195	0.0523079
ENSG00000070476	ZXDC	0.0462932	0.85519	0.926368
ENSG00000070495	JMJD6	-0.246079	0.561437	0.746886
ENSG00000070501	POLB	0.0588131	0.942997	0.971252
ENSG00000070610	GBA2	0.108132	0.753255	0.870814
ENSG00000177119	ANO6	-1.26035	0.131741	0.317033
ENSG00000070718	AP3M2	0.674716	0.455401	0.665294
ENSG00000072062	PRKACA	-1.26012	0.00941721	0.0567086
ENSG00000070759	TESK2	0.49095	0.408364	0.625758
ENSG00000247853	AC006064.2	-1.25813	0.129654	0.314255
ENSG00000070770	CSNK2A2	-0.333774	0.380276	0.598196
ENSG00000173218	VANGL1	-1.2579	0.08591	0.243222
ENSG00000159055	MIS18A	-1.25764	0.056905	0.188372
ENSG00000186566	GPATCH8	-1.25706	0.0307794	0.126902
ENSG00000094975	SUCO	-1.25585	0.0173448	0.0873567
ENSG00000215421	ZNF407	-1.25573	0.041647	0.154599
ENSG00000214517	PPME1	-1.25554	0.000901738	0.010066
ENSG00000188452	CERKL	-1.25141	0.00156316	0.0153504
ENSG00000071054	MAP4K4	0.0897265	0.628591	0.792677
ENSG00000215492	HNRNPA1P7	-1.25131	0.0367233	0.14221
ENSG00000116133	DHCR24	-1.24903	4.94503e-07	2.9759e-05
ENSG00000183166	CALN1	-1.24824	0.150624	0.344304
ENSG00000100815	TRIP11	-1.24799	0.127979	0.31207
ENSG00000112208	BAG2	-1.2478	0.10719	0.279253
ENSG00000118292	C1orf54	-1.24486	0.00504218	0.0369524
ENSG00000071539	TRIP13	-0.736943	0.473934	0.681163
ENSG00000157259	GATAD1	-1.24373	0.0124591	0.0693336
ENSG00000071564	TCF3	-0.131133	0.365541	0.58597
ENSG00000071626	DAZAP1	-0.045135	0.825262	0.912444
ENSG00000214212	C19orf38	-1.24314	0.0630651	0.199749
ENSG00000071794	HLTF	-0.308975	0.331814	0.55515
ENSG00000127483	HP1BP3	-1.24218	2.27568e-05	0.000605215
ENSG00000093167	LRRFIP2	-1.23961	0.0955635	0.259442
ENSG00000186908	ZDHHC17	-1.2394	0.115058	0.292095
ENSG00000168005	C11orf84	-1.238	0.000271378	0.00407542
ENSG00000071994	PDCD2	-0.245171	0.342677	0.564594
ENSG00000144445	KANSL1L	-1.23793	0.151149	0.345253
ENSG00000064601	CTSA	-1.23655	8.48998e-07	4.57423e-05
ENSG00000072071	ADGRL1	-0.150756	0.561784	0.747067
ENSG00000205268	PDE7A	-1.23648	0.00145547	0.0145052
ENSG00000072121	ZFYVE26	0.0693484	0.873141	0.936912
ENSG00000263072	ZNF213-AS1	-1.23585	0.0521347	0.178628
ENSG00000072201	LNX1	-0.0683911	0.854664	0.926097
ENSG00000072210	ALDH3A2	0.299784	0.557196	0.744022
ENSG00000166002	SMCO4	-1.23479	0.123596	0.305394
ENSG00000170185	USP38	-1.23438	0.101145	0.269324
ENSG00000072364	AFF4	-0.122793	0.834066	0.917101
ENSG00000072401	UBE2D1	-0.349482	0.497371	0.698895
ENSG00000198648	STK39	-1.23277	0.0827987	0.237925
ENSG00000072506	HSD17B10	0.179396	0.535296	0.728873
ENSG00000072518	MARK2	-0.142279	0.553704	0.741619
ENSG00000072609	CHFR	0.0822405	0.753475	0.870814
ENSG00000072736	NFATC3	0.166043	0.424476	0.638447
ENSG00000139946	PELI2	-1.23045	0.0674174	0.208734
ENSG00000120802	TMPO	-1.22872	1.40319e-07	1.03726e-05
ENSG00000072786	STK10	0.033605	0.816046	0.907921
ENSG00000013573	DDX11	-1.22857	0.0528799	0.180207
ENSG00000087586	AURKA	-1.22515	0.069391	0.212751
ENSG00000116191	RALGPS2	-1.2247	0.115656	0.292821
ENSG00000170312	CDK1	-1.22429	0.0487298	0.171402
ENSG00000072958	AP1M1	0.0994608	0.639176	0.799154
ENSG00000213965	NUDT19	-1.223	0.0350825	0.137985
ENSG00000130193	THEM6	-1.22211	0.100233	0.267705
ENSG00000073060	SCARB1	-0.179353	0.448212	0.661038
ENSG00000178999	AURKB	-1.22184	0.00966374	0.057712
ENSG00000111554	MDM1	-1.22164	0.0537851	0.182221
ENSG00000162736	NCSTN	-1.22066	0.00436561	0.0330786
ENSG00000170540	ARL6IP1	-1.22065	0.000324116	0.00470293
ENSG00000260350	AC012173.1	-1.21855	0.079597	0.232935
ENSG00000073536	NLE1	0.170956	0.615209	0.784166
ENSG00000145495	MARCH6	-1.21796	0.000709107	0.00844809
ENSG00000073584	SMARCE1	0.102281	0.67279	0.821346
ENSG00000131626	PPFIA1	-1.21695	0.00758748	0.0493291
ENSG00000073792	IGF2BP2	-0.114935	0.702325	0.840034
ENSG00000136450	SRSF1	-1.21688	0.000116887	0.00217724
ENSG00000073849	ST6GAL1	-0.450285	0.342531	0.564551
ENSG00000170234	PWWP2A	-1.2154	0.0185595	0.0911145
ENSG00000073921	PICALM	0.0102839	0.944074	0.971497
ENSG00000073969	NSF	0.012176	0.974269	0.986242
ENSG00000166851	PLK1	-1.21342	0.0025253	0.0220946
ENSG00000196371	FUT4	-1.21256	1.16174e-05	0.000363546
ENSG00000074181	NOTCH3	0.902356	0.508651	0.707276
ENSG00000197020	ZNF100	-1.21215	0.0405883	0.151871
ENSG00000203865	ATP1A1-AS1	-1.21026	0.0110567	0.0637986
ENSG00000074319	TSG101	0.202105	0.52367	0.718648
ENSG00000074356	NCBP3	0.0122293	0.96464	0.981202
ENSG00000163406	SLC15A2	-1.21024	0.00838394	0.052662
ENSG00000142733	MAP3K6	-1.21013	0.00698534	0.0467415
ENSG00000245322	AC097460.1	-1.20982	9.0839e-05	0.00179536
ENSG00000074603	DPP8	-0.339171	0.393791	0.611262
ENSG00000146833	TRIM4	-1.20782	0.0625556	0.198873
ENSG00000130768	SMPDL3B	-1.20539	0.211064	0.422488
ENSG00000074695	LMAN1	-0.402494	0.333443	0.556806
ENSG00000139146	SINHCAF	-1.20524	0.00690302	0.0463559
ENSG00000126804	ZBTB1	-1.20522	0.0564173	0.187419
ENSG00000259953	AL138756.1	-1.20065	0.0400996	0.150776
ENSG00000126106	TMEM53	-1.19978	0.0091134	0.0556061
ENSG00000136560	TANK	-1.19892	0.00688742	0.0462843
ENSG00000075142	SRI	0.21292	0.463818	0.672404
ENSG00000165914	TTC7B	-1.19883	0.00458656	0.0344194
ENSG00000075188	NUP37	0.193187	0.641559	0.800606
ENSG00000138688	KIAA1109	-1.19835	0.0732069	0.220348
ENSG00000271984	AL008726.1	-1.19828	0.0632166	0.200094
ENSG00000198189	HSD17B11	-1.19766	0.000396333	0.00543406
ENSG00000032219	ARID4A	-1.19612	0.0292188	0.122524
ENSG00000092439	TRPM7	-1.19592	0.0111272	0.064128
ENSG00000145348	TBCK	-1.19478	0.0457386	0.164582
ENSG00000075336	TIMM21	0.242818	0.593777	0.770493
ENSG00000075340	ADD2	-0.161402	0.568266	0.751392
ENSG00000146433	TMEM181	-1.1939	0.00288405	0.0243621
ENSG00000075407	ZNF37A	0.388661	0.401465	0.619072
ENSG00000075413	MARK3	-0.116393	0.656996	0.811047
ENSG00000075415	SLC25A3	-0.0525409	0.685848	0.831341
ENSG00000066422	ZBTB11	-1.19242	0.101978	0.270519
ENSG00000155506	LARP1	-1.19168	6.05614e-08	5.26436e-06
ENSG00000109586	GALNT7	-1.19163	0.0238076	0.106941
ENSG00000088305	DNMT3B	-1.19153	0.00558756	0.0399513
ENSG00000075618	FSCN1	-0.133466	0.395884	0.613193
ENSG00000157870	FAM213B	-1.18915	0.0625297	0.198858
ENSG00000075651	PLD1	0.2583	0.541601	0.732961
ENSG00000186480	INSIG1	-1.18911	0.0016382	0.0159452
ENSG00000075711	DLG1	-0.332781	0.363109	0.583963
ENSG00000075785	RAB7A	-0.073318	0.646065	0.804015
ENSG00000075790	BCAP29	-0.547627	0.465417	0.673471
ENSG00000075856	SART3	0.236203	0.451849	0.663322
ENSG00000132801	ZSWIM3	-1.18793	0.116778	0.293917
ENSG00000075914	EXOSC7	0.15178	0.640733	0.8002
ENSG00000075975	MKRN2	0.223151	0.482452	0.688443
ENSG00000076003	MCM6	-0.30378	0.300514	0.521001
ENSG00000076043	REXO2	0.149671	0.778533	0.885886
ENSG00000076053	RBM7	0.209573	0.422013	0.636979
ENSG00000076067	RBMS2	-0.186303	0.492992	0.695971
ENSG00000168411	RFWD3	-1.1876	0.00109577	0.0117165
ENSG00000076201	PTPN23	0.241146	0.423127	0.63761
ENSG00000076242	MLH1	0.233655	0.492569	0.695752
ENSG00000123562	MORF4L2	-1.18751	0.000156648	0.00270831
ENSG00000114904	NEK4	-1.18685	0.0935114	0.255748
ENSG00000047410	TPR	-1.18499	0.00231599	0.0207269
ENSG00000076513	ANKRD13A	-0.267371	0.405492	0.62263
ENSG00000076604	TRAF4	0.130625	0.616691	0.78485
ENSG00000076650	GPATCH1	0.261977	0.542252	0.733102
ENSG00000177169	ULK1	-1.18491	2.61611e-08	2.72889e-06
ENSG00000138760	SCARB2	-1.18223	0.00637062	0.043655
ENSG00000076770	MBNL3	-0.391237	0.410932	0.627783
ENSG00000157404	KIT	-1.17948	0.0287213	0.120859
ENSG00000076928	ARHGEF1	-0.187192	0.303665	0.52443
ENSG00000113532	ST8SIA4	-1.17503	0.0181889	0.0901597
ENSG00000076984	MAP2K7	0.0766609	0.772236	0.882587
ENSG00000132692	BCAN	-1.17289	0.217596	0.430424
ENSG00000077097	TOP2B	-0.247617	0.329493	0.553063
ENSG00000081014	AP4E1	-1.17247	0.0558634	0.186436
ENSG00000134057	CCNB1	-1.17213	0.0433115	0.15854
ENSG00000228060	AL365277.2	-1.17153	0.00467456	0.0348015
ENSG00000077235	GTF3C1	0.0336009	0.894291	0.948549
ENSG00000279364	AC114546.3	-1.16982	0.00473341	0.03512
ENSG00000077254	USP33	-0.0939061	0.783219	0.888133
ENSG00000077312	SNRPA	0.0156439	0.940137	0.970531
ENSG00000077348	EXOSC5	-0.223765	0.826576	0.913359
ENSG00000077380	DYNC1I2	0.20465	0.414595	0.630932
ENSG00000077420	APBB1IP	0.0892919	0.651217	0.807186
ENSG00000278129	ZNF8	-1.16949	0.277749	0.498568
ENSG00000173207	CKS1B	-1.16928	0.0634835	0.200738
ENSG00000137700	SLC37A4	-1.16904	0.0363338	0.14135
ENSG00000051825	MPHOSPH9	-1.16817	0.0158404	0.0824979
ENSG00000077549	CAPZB	0.0840027	0.587948	0.766087
ENSG00000077684	JADE1	0.377402	0.395117	0.61295
ENSG00000070614	NDST1	-1.16777	9.96582e-05	0.00193304
ENSG00000134313	KIDINS220	-1.16775	0.00369451	0.0293684
ENSG00000077984	CST7	0.472819	0.337375	0.560166
ENSG00000078043	PIAS2	-0.18703	0.6514	0.807306
ENSG00000117569	PTBP2	-1.16773	0.0145165	0.0772128
ENSG00000182095	TNRC18	-1.1674	3.2508e-08	3.11413e-06
ENSG00000078124	ACER3	0.382227	0.297302	0.518112
ENSG00000066739	ATG2B	-1.16624	0.00580057	0.0409442
ENSG00000196247	ZNF107	-1.16566	0.142632	0.332347
ENSG00000078177	N4BP2	0.264686	0.553001	0.741229
ENSG00000078269	SYNJ2	0.274208	0.486929	0.69241
ENSG00000078304	PPP2R5C	0.252938	0.377092	0.595077
ENSG00000175455	CCDC14	-1.16516	0.0116363	0.0660068
ENSG00000073910	FRY	-1.1639	0.0804614	0.234154
ENSG00000078399	HOXA9	0.151506	0.725946	0.855533
ENSG00000259781	HMGB1P6	-1.1638	0.0898668	0.249606
ENSG00000109046	WSB1	-1.16345	0.000264689	0.00401437
ENSG00000131389	SLC6A6	-1.16245	0.000133953	0.00240911
ENSG00000078618	NRDC	-0.0424621	0.831117	0.916004
ENSG00000134986	NREP	-1.16244	1.90928e-06	9.09863e-05
ENSG00000078674	PCM1	-0.0989459	0.745064	0.866104
ENSG00000078687	TNRC6C	0.0225645	0.935494	0.968079
ENSG00000078699	CBFA2T2	-0.217473	0.662074	0.81389
ENSG00000161547	SRSF2	-1.16162	2.50468e-08	2.72821e-06
ENSG00000109929	SC5D	-1.16091	0.0208517	0.0979001
ENSG00000078900	TP73	0.00035309	0.999396	0.999396
ENSG00000127311	HELB	-1.15809	0.00410502	0.0316963
ENSG00000078967	UBE2D4	0.252619	0.686228	0.831587
ENSG00000079134	THOC1	0.29575	0.309384	0.53089
ENSG00000079246	XRCC5	-0.128829	0.404806	0.622288
ENSG00000197930	ERO1A	-1.15809	0.00333711	0.0271515
ENSG00000079313	REXO1	-0.228313	0.391757	0.609515
ENSG00000079332	SAR1A	0.013372	0.969265	0.983513
ENSG00000079337	RAPGEF3	-0.257674	0.703102	0.840161
ENSG00000079387	SENP1	-0.214658	0.712679	0.846915
ENSG00000122299	ZC3H7A	-1.15739	0.0367931	0.142321
ENSG00000127337	YEATS4	-1.15717	0.015207	0.0798661
ENSG00000079462	PAFAH1B3	0.355786	0.307975	0.529342
ENSG00000079616	KIF22	-0.169598	0.384239	0.601606
ENSG00000140450	ARRDC4	-1.15658	0.00582268	0.0410385
ENSG00000168405	CMAHP	-1.15635	0.170186	0.37001
ENSG00000079805	DNM2	0.0653483	0.6585	0.811498
ENSG00000079950	STX7	-0.345645	0.423032	0.63757
ENSG00000079974	RABL2B	-0.0794217	0.830428	0.915775
ENSG00000076382	SPAG5	-1.15555	0.0830179	0.238194
ENSG00000184445	KNTC1	-1.15534	0.11606	0.29321
ENSG00000080200	CRYBG3	0.382367	0.429936	0.643571
ENSG00000117335	CD46	-1.15447	0.00912948	0.0556543
ENSG00000273344	PAXIP1-AS1	-1.15376	0.263332	0.483316
ENSG00000276550	HERC2P2	-1.15293	0.160569	0.357718
ENSG00000080546	SESN1	-0.215345	0.650377	0.806964
ENSG00000080608	PUM3	0.188176	0.599517	0.773219
ENSG00000080802	CNOT4	-0.781511	0.313643	0.536319
ENSG00000080815	PSEN1	0.00758006	0.972295	0.985326
ENSG00000080819	CPOX	-0.132504	0.872079	0.936093
ENSG00000080822	CLDND1	-0.225251	0.632753	0.795432
ENSG00000080824	HSP90AA1	0.126703	0.502984	0.704042
ENSG00000172432	GTPBP2	-1.15198	0.022602	0.103104
ENSG00000080845	DLGAP4	0.0610485	0.867565	0.934136
ENSG00000198466	ZNF587	-1.15186	0.00251662	0.0220392
ENSG00000088812	ATRN	-1.15088	0.194708	0.402624
ENSG00000081087	OSTM1	0.159638	0.752299	0.870741
ENSG00000081154	PCNP	0.238814	0.321998	0.545259
ENSG00000081181	ARG2	-0.207616	0.514977	0.711429
ENSG00000235859	AC006978.1	-1.15017	0.106049	0.277476
ENSG00000132182	NUP210	-1.14947	5.12983e-07	3.02886e-05
ENSG00000081307	UBA5	-0.216887	0.788324	0.891554
ENSG00000081320	STK17B	-0.282054	0.376427	0.594432
ENSG00000081665	ZNF506	0.192524	0.577905	0.758887
ENSG00000004139	SARM1	-1.14866	0.0356439	0.139137
ENSG00000166598	HSP90B1	-1.14857	0.000154015	0.00268255
ENSG00000081760	AACS	0.329411	0.390133	0.607593
ENSG00000081791	KIAA0141	-0.0225071	0.932644	0.967156
ENSG00000081870	HSPB11	0.0424621	0.959094	0.978374
ENSG00000081913	PHLPP1	-0.0349636	0.93624	0.968318
ENSG00000082014	SMARCD3	0.062632	0.93414	0.967765
ENSG00000082068	WDR70	0.267661	0.574882	0.756729
ENSG00000269534	AC011466.3	-1.14787	0.00724506	0.0478317
ENSG00000266074	BAHCC1	-1.14758	0.000146677	0.00258349
ENSG00000082153	BZW1	0.12009	0.563561	0.748544
ENSG00000082212	ME2	-0.333235	0.283097	0.504023
ENSG00000007944	MYLIP	-1.14708	0.0578739	0.189545
ENSG00000221890	NPTXR	-1.14639	0.119812	0.298751
ENSG00000082512	TRAF5	0.518083	0.32929	0.552919
ENSG00000141506	PIK3R5	-1.14582	0.0619763	0.197903
ENSG00000082516	GEMIN5	-0.321045	0.355251	0.576505
ENSG00000058804	NDC1	-1.14567	0.0192149	0.0927453
ENSG00000082701	GSK3B	0.0514975	0.871817	0.936027
ENSG00000276023	DUSP14	-1.14368	0.0510884	0.177041
ENSG00000255114	AP003392.3	-1.143	0.00182299	0.0172523
ENSG00000240859	AC093627.4	-1.14291	0.17391	0.374492
ENSG00000100650	SRSF5	-1.14237	0.000703303	0.00838959
ENSG00000083099	LYRM2	0.225718	0.505513	0.705677
ENSG00000083123	BCKDHB	-0.626238	0.39375	0.611262
ENSG00000083168	KAT6A	-0.174308	0.610309	0.780596
ENSG00000083223	ZCCHC6	-0.244543	0.549833	0.739729
ENSG00000185340	GAS2L1	-1.14203	0.085162	0.241614
ENSG00000181220	ZNF746	-1.14168	0.113481	0.289736
ENSG00000083454	P2RX5	1.26231	0.47727	0.68375
ENSG00000083457	ITGAE	0.199309	0.635888	0.797622
ENSG00000152944	MED21	-1.14118	0.0169565	0.0861617
ENSG00000083544	TDRD3	0.197518	0.632221	0.795105
ENSG00000149428	HYOU1	-1.14056	3.28744e-05	0.000795425
ENSG00000178567	EPM2AIP1	-1.14041	0.00277209	0.0238318
ENSG00000083799	CYLD	-0.241383	0.447956	0.660916
ENSG00000075426	FOSL2	-1.13993	0.000197526	0.00324191
ENSG00000173905	GOLIM4	-1.13975	0.0303147	0.125318
ENSG00000159579	RSPRY1	-1.13688	0.0175299	0.0877496
ENSG00000083828	ZNF586	0.124816	0.784527	0.888866
ENSG00000083838	ZNF446	-0.50087	0.329623	0.553137
ENSG00000083844	ZNF264	-0.464163	0.313642	0.536319
ENSG00000232653	GOLGA8N	-1.13639	0.00729303	0.048047
ENSG00000083896	YTHDC1	-0.115885	0.614303	0.78357
ENSG00000083937	CHMP2B	-0.30998	0.625873	0.790594
ENSG00000084070	SMAP2	0.00876921	0.967482	0.98234
ENSG00000066777	ARFGEF1	-1.13414	0.00254653	0.0222389
ENSG00000084073	ZMPSTE24	-0.822891	0.288891	0.510079
ENSG00000139323	POC1B	-1.1322	0.0393689	0.14891
ENSG00000084092	NOA1	-0.257352	0.467603	0.675259
ENSG00000084093	REST	0.0955681	0.700267	0.839127
ENSG00000084110	HAL	0.391577	0.498178	0.699505
ENSG00000084112	SSH1	-0.0237308	0.956882	0.977392
ENSG00000169504	CLIC4	-1.13213	0.0184867	0.0909486
ENSG00000104047	DTWD1	-1.13206	0.162256	0.359935
ENSG00000171988	JMJD1C	-1.13069	0.165367	0.364222
ENSG00000142192	APP	-1.12986	0.0519409	0.178303
ENSG00000142197	DOPEY2	-1.12966	0.01731	0.0872891
ENSG00000084676	NCOA1	0.232617	0.521766	0.71737
ENSG00000084693	AGBL5	-0.185751	0.359439	0.579645
ENSG00000100647	SUSD6	-1.12658	0.0142578	0.0763559
ENSG00000084733	RAB10	-0.20646	0.320661	0.543684
ENSG00000175832	ETV4	-1.12629	0.0880357	0.247079
ENSG00000152620	NADK2	-1.12609	0.104608	0.275152
ENSG00000085063	CD59	-0.277231	0.436925	0.650262
ENSG00000129566	TEP1	-1.12556	0.0260404	0.112871
ENSG00000085185	BCORL1	-0.369599	0.333297	0.55676
ENSG00000085224	ATRX	0.255275	0.41997	0.635321
ENSG00000085231	AK6	0.173517	0.739796	0.863402
ENSG00000085265	FCN1	-0.0678087	0.911838	0.956997
ENSG00000197217	ENTPD4	-1.12511	0.0366636	0.14221
ENSG00000085365	SCAMP1	-0.338415	0.55834	0.744664
ENSG00000011021	CLCN6	-1.12426	0.138261	0.326294
ENSG00000085415	SEH1L	0.046855	0.919238	0.960682
ENSG00000085449	WDFY1	-0.253447	0.663974	0.815141
ENSG00000198056	PRIM1	-1.12407	0.00767463	0.0495185
ENSG00000085511	MAP3K4	0.0263463	0.939466	0.970204
ENSG00000085514	PILRA	-0.614074	0.361529	0.582267
ENSG00000085644	ZNF213	-0.765114	0.35414	0.5756
ENSG00000085662	AKR1B1	-0.0661636	0.838194	0.918737
ENSG00000085719	CPNE3	0.714344	0.693475	0.835367
ENSG00000148841	ITPRIP	-1.12334	0.0347559	0.137211
ENSG00000085741	WNT11	-0.683305	0.512553	0.709502
ENSG00000145016	RUBCN	-1.12328	0.00595933	0.0416887
ENSG00000245748	AC097382.2	-1.12268	0.000272535	0.00408064
ENSG00000085832	EPS15	-0.145013	0.490241	0.695014
ENSG00000214013	GANC	-1.12259	0.0199882	0.0951088
ENSG00000176871	WSB2	-1.12161	0.0126075	0.069911
ENSG00000085872	CHERP	-0.0222372	0.890119	0.945405
ENSG00000085978	ATG16L1	-0.774747	0.355096	0.576355
ENSG00000085982	USP40	0.189865	0.577109	0.758278
ENSG00000085998	POMGNT1	-0.325548	0.336327	0.559531
ENSG00000175063	UBE2C	-1.11941	0.193612	0.401454
ENSG00000267062	AC018761.2	-1.11889	0.0174181	0.087491
ENSG00000086061	DNAJA1	-0.0758663	0.758686	0.873979
ENSG00000063587	ZNF275	-1.11826	0.17893	0.382031
ENSG00000086065	CHMP5	-0.164808	0.538047	0.730256
ENSG00000170266	GLB1	-1.11795	0.0020824	0.0190728
ENSG00000086189	DIMT1	-0.335833	0.287104	0.508649
ENSG00000086200	IPO11	0.264736	0.55275	0.741127
ENSG00000117616	RSRP1	-1.11771	0.0284811	0.120225
ENSG00000081721	DUSP12	-1.11765	0.104013	0.274191
ENSG00000086300	SNX10	-0.267375	0.754008	0.871002
ENSG00000086475	SEPHS1	-0.210301	0.455458	0.665294
ENSG00000122966	CIT	-1.11525	0.0186403	0.0911906
ENSG00000086506	HBQ1	0.625158	0.488707	0.693782
ENSG00000086544	ITPKC	0.223117	0.784985	0.88917
ENSG00000133858	ZFC3H1	-1.11395	0.0764057	0.226706
ENSG00000196507	TCEAL3	-1.11354	0.00365948	0.0292385
ENSG00000086666	ZFAND6	0.146173	0.58825	0.766268
ENSG00000158769	F11R	-1.11344	6.86717e-05	0.00142631
ENSG00000132680	KHDC4	-1.11322	0.163757	0.362071
ENSG00000126860	EVI2A	-1.1125	0.0767511	0.227371
ENSG00000086827	ZW10	-0.552396	0.467858	0.67542
ENSG00000160741	CRTC2	-1.11203	0.00283669	0.0242109
ENSG00000087053	MTMR2	0.234808	0.581824	0.761808
ENSG00000087074	PPP1R15A	0.0562657	0.838429	0.918885
ENSG00000114439	BBX	-1.11137	0.140624	0.329797
ENSG00000150403	TMCO3	-1.11066	0.000606363	0.00752981
ENSG00000087087	SRRT	-0.251084	0.38691	0.604278
ENSG00000176912	TYMSOS	-1.10747	0.129138	0.314161
ENSG00000197724	PHF2	-1.10622	0.195064	0.403172
ENSG00000087111	PIGS	-0.107213	0.732747	0.860101
ENSG00000060762	MPC1	-1.10092	0.0566026	0.187835
ENSG00000187514	PTMA	-1.09913	9.95963e-16	4.9211e-13
ENSG00000167548	KMT2D	-1.099	0.00490623	0.0360996
ENSG00000087206	UIMC1	-0.197685	0.390463	0.608006
ENSG00000114450	GNB4	-1.09878	0.0212654	0.0991586
ENSG00000116001	TIA1	-1.09761	0.0229569	0.10413
ENSG00000143641	GALNT2	-1.09684	7.07703e-05	0.0014602
ENSG00000087266	SH3BP2	-0.0204608	0.934479	0.96786
ENSG00000087269	NOP14	0.0472509	0.850071	0.923657
ENSG00000115464	USP34	-1.09659	0.00106875	0.011493
ENSG00000087302	RTRAF	0.204761	0.398817	0.616429
ENSG00000139163	ETNK1	-1.09642	0.000750085	0.00879126
ENSG00000143882	ATP6V1C2	-1.09497	5.72473e-06	0.00021076
ENSG00000085788	DDHD2	-1.09446	0.0125788	0.0698343
ENSG00000165175	MID1IP1	-1.09442	0.00310619	0.0256698
ENSG00000136997	MYC	-1.09376	0.000348537	0.00495017
ENSG00000087502	ERGIC2	0.110267	0.792056	0.893836
ENSG00000137462	TLR2	-1.09193	0.00434817	0.0329997
ENSG00000087842	PIR	0.26006	0.701191	0.839427
ENSG00000087884	AAMDC	-0.0413903	0.923156	0.963019
ENSG00000116273	PHF13	-1.09064	0.15676	0.35224
ENSG00000151725	CENPU	-1.09056	0.0527375	0.179971
ENSG00000156802	ATAD2	-1.09028	0.000401715	0.00548169
ENSG00000131351	HAUS8	-1.08975	0.0614543	0.196704
ENSG00000173894	CBX2	-1.08884	0.0107912	0.0624969
ENSG00000088256	GNA11	0.00107608	0.998191	0.998722
ENSG00000088298	EDEM2	0.296492	0.340429	0.562964
ENSG00000213186	TRIM59	-1.08875	8.6929e-05	0.00173872
ENSG00000179163	FUCA1	-1.08851	0.0525818	0.179701
ENSG00000167110	GOLGA2	-1.08795	0.0602344	0.194524
ENSG00000160298	C21orf58	-1.08714	0.00298183	0.0249718
ENSG00000154845	PPP4R1	-1.08666	0.0170116	0.0862804
ENSG00000088727	KIF9	0.369346	0.653658	0.809103
ENSG00000088766	CRLS1	-0.103094	0.699989	0.839127
ENSG00000119242	CCDC92	-1.08478	0.07188	0.217821
ENSG00000119596	YLPM1	-1.08474	0.0150083	0.0791119
ENSG00000174177	CTU2	-1.08224	0.0336394	0.13473
ENSG00000085491	SLC25A24	-1.0816	0.205368	0.415266
ENSG00000198563	DDX39B	-1.08146	0.000300484	0.00442849
ENSG00000088882	CPXM1	-0.170422	0.604543	0.776573
ENSG00000088888	MAVS	-0.16323	0.331309	0.554624
ENSG00000088930	XRN2	0.0425598	0.853699	0.925465
ENSG00000173198	CYSLTR1	-1.08124	0.129358	0.314255
ENSG00000088992	TESC	0.069034	0.779147	0.88613
ENSG00000183723	CMTM4	-1.08087	0.0317399	0.129309
ENSG00000054965	FAM168A	-1.07936	0.00188946	0.0177028
ENSG00000089022	MAPKAPK5	-0.41009	0.339885	0.562262
ENSG00000166016	ABTB2	-1.07826	0.0827814	0.237925
ENSG00000116991	SIPA1L2	-1.07795	0.11063	0.284802
ENSG00000089060	SLC8B1	-0.0145055	0.952463	0.975601
ENSG00000112096	SOD2	-1.07576	0.00344679	0.0278233
ENSG00000100934	SEC23A	-1.07575	0.0710293	0.21601
ENSG00000089154	GCN1	-0.175236	0.425343	0.639104
ENSG00000065600	TMEM206	-1.0745	0.147247	0.339144
ENSG00000089159	PXN	0.0798307	0.713589	0.847276
ENSG00000089195	TRMT6	0.15554	0.698045	0.838008
ENSG00000074855	ANO8	-1.07335	0.156975	0.352472
ENSG00000089234	BRAP	0.235379	0.47025	0.677484
ENSG00000089248	ERP29	0.154457	0.366973	0.587494
ENSG00000117000	RLF	-1.07309	0.180744	0.38387
ENSG00000143156	NME7	-1.07238	0.134531	0.321122
ENSG00000228716	DHFR	-1.07191	0.000195984	0.00322224
ENSG00000163660	CCNL1	-1.07024	4.29043e-06	0.000169238
ENSG00000089351	GRAMD1A	-0.304963	0.350582	0.571834
ENSG00000164327	RICTOR	-1.06991	0.0335782	0.134542
ENSG00000181555	SETD2	-1.06926	0.00330016	0.0269174
ENSG00000197771	MCMBP	-1.06879	0.00144529	0.0144537
ENSG00000089685	BIRC5	-0.899284	0.393127	0.610938
ENSG00000135211	TMEM60	-1.06853	0.0503407	0.175622
ENSG00000276043	UHRF1	-1.0684	0.00176947	0.0168835
ENSG00000247228	AC009060.1	-1.06809	0.0623765	0.198842
ENSG00000142867	BCL10	-1.06717	0.125911	0.309275
ENSG00000089876	DHX32	-0.120401	0.783498	0.888343
ENSG00000089902	RCOR1	-0.191155	0.637886	0.798852
ENSG00000089775	ZBTB25	-1.06714	0.0195334	0.0938005
ENSG00000090006	LTBP4	-0.0836391	0.861219	0.929752
ENSG00000205269	TMEM170B	-1.06707	0.00159009	0.015566
ENSG00000090020	SLC9A1	-0.115993	0.772686	0.882587
ENSG00000225138	SLC9A3-AS1	-1.06663	0.140401	0.32977
ENSG00000120093	HOXB3	-1.06575	0.040338	0.151173
ENSG00000090238	YPEL3	0.021036	0.928615	0.965751
ENSG00000090263	MRPS33	0.111779	0.739364	0.863167
ENSG00000168275	COA6	-1.06556	0.143814	0.334688
ENSG00000125944	HNRNPR	-1.0593	1.68192e-06	8.26696e-05
ENSG00000090316	MAEA	0.212787	0.317971	0.54078
ENSG00000117868	ESYT2	-1.05792	0.000405071	0.00550334
ENSG00000187605	TET3	-1.0574	0.00572316	0.0406415
ENSG00000224277	AP000345.1	-1.05708	0.00493093	0.0362503
ENSG00000090382	LYZ	-0.0545775	0.743921	0.865419
ENSG00000090432	MUL1	0.0844236	0.797459	0.896815
ENSG00000113368	LMNB1	-1.05607	7.59322e-06	0.000263631
ENSG00000090470	PDCD7	-0.165314	0.608787	0.779532
ENSG00000198162	MAN1A2	-1.05472	0.167606	0.366781
ENSG00000155111	CDK19	-1.05429	0.0434862	0.158916
ENSG00000143476	DTL	-1.05238	0.221904	0.436187
ENSG00000090581	GNPTG	0.130959	0.50613	0.705967
ENSG00000090612	ZNF268	0.270303	0.4193	0.634697
ENSG00000090615	GOLGA3	-0.143179	0.550519	0.740018
ENSG00000198521	ZNF43	-1.05218	0.0130807	0.0718557
ENSG00000244038	DDOST	-1.05215	5.55572e-05	0.00121578
ENSG00000090674	MCOLN1	-0.389355	0.519106	0.715409
ENSG00000180964	TCEAL8	-1.05187	0.00855308	0.053258
ENSG00000182621	PLCB1	-1.05148	0.0379414	0.145444
ENSG00000008256	CYTH3	-1.05008	0.0259408	0.112803
ENSG00000090861	AARS	-0.303186	0.454538	0.664754
ENSG00000090863	GLG1	-0.090424	0.693928	0.835542
ENSG00000176624	MEX3C	-1.04968	0.107318	0.279253
ENSG00000090924	PLEKHG2	0.170706	0.506902	0.706368
ENSG00000170903	MSANTD4	-1.04731	0.189766	0.395924
ENSG00000090975	PITPNM2	0.184993	0.627535	0.792026
ENSG00000126464	PRR12	-1.04713	0.0195487	0.0938256
ENSG00000149636	DSN1	-1.04699	0.0353506	0.138626
ENSG00000140406	TLNRD1	-1.04593	0.0239432	0.107242
ENSG00000145817	YIPF5	-1.04501	0.175989	0.377643
ENSG00000091140	DLD	-0.0337169	0.904235	0.952959
ENSG00000091164	TXNL1	0.233875	0.541176	0.732808
ENSG00000091317	CMTM6	-0.299047	0.355311	0.576505
ENSG00000091409	ITGA6	-0.390501	0.389052	0.606312
ENSG00000065526	SPEN	-1.04468	0.00706218	0.0471549
ENSG00000091483	FH	0.0543018	0.869161	0.934781
ENSG00000130590	SAMD10	-1.04442	0.154297	0.349299
ENSG00000091527	CDV3	-0.0190367	0.900575	0.950917
ENSG00000091542	ALKBH5	-0.115689	0.537246	0.729723
ENSG00000146083	RNF44	-1.04339	0.00140813	0.0143069
ENSG00000159267	HLCS	-1.04259	0.168169	0.367499
ENSG00000176182	MYPOP	-1.04198	0.0445993	0.161722
ENSG00000125386	FAM193A	-1.04172	0.00296125	0.0248883
ENSG00000091947	TMEM101	0.0365678	0.908271	0.954961
ENSG00000164244	PRRC1	-1.04122	0.0124676	0.0693398
ENSG00000104299	INTS9	-1.04063	0.257877	0.477716
ENSG00000139370	SLC15A4	-1.04015	0.0286506	0.120615
ENSG00000092094	OSGEP	-0.205271	0.510888	0.708452
ENSG00000256928	AP000763.4	-1.04	0.000701633	0.00838032
ENSG00000134996	OSTF1	-1.03851	0.0162926	0.0839949
ENSG00000092199	HNRNPC	-0.0601497	0.629473	0.793109
ENSG00000108582	CPD	-1.03846	0.00916931	0.0557182
ENSG00000075240	GRAMD4	-1.0379	0.00144568	0.0144537
ENSG00000075303	SLC25A40	-1.03755	0.223537	0.438114
ENSG00000109920	FNBP4	-1.03633	0.00727615	0.0479695
ENSG00000092445	TYRO3	0.60295	0.472211	0.679465
ENSG00000196123	KIAA0895L	-1.03562	0.198049	0.40649
ENSG00000092531	SNAP23	-0.202609	0.578882	0.75929
ENSG00000119953	SMNDC1	-1.03557	0.00637004	0.043655
ENSG00000092758	COL9A3	0.242046	0.647086	0.804506
ENSG00000092820	EZR	0.2033	0.526006	0.72045
ENSG00000114857	NKTR	-1.03537	0.00786085	0.0502367
ENSG00000092847	AGO1	-0.0782015	0.781389	0.887209
ENSG00000092871	RFFL	-0.0252516	0.935095	0.96786
ENSG00000204130	RUFY2	-1.03532	0.0224429	0.102528
ENSG00000267757	EML2-AS1	-1.03513	0.148276	0.340679
ENSG00000230530	LIMD1-AS1	-1.03498	0.139425	0.32846
ENSG00000093000	NUP50	0.187193	0.358603	0.579503
ENSG00000031003	FAM13B	-1.03422	0.0153135	0.0802695
ENSG00000163655	GMPS	-1.03418	9.48379e-06	0.000311307
ENSG00000162063	CCNF	-1.03358	0.0111274	0.064128
ENSG00000146247	PHIP	-1.0325	0.0460911	0.16528
ENSG00000088448	ANKRD10	-1.03215	0.000674348	0.00815731
ENSG00000189362	NEMP2	-1.03118	0.183785	0.38848
ENSG00000144136	SLC20A1	-1.03086	0.00138855	0.0141693
ENSG00000057252	SOAT1	-1.03051	0.224696	0.439102
ENSG00000094880	CDC23	-0.57741	0.713497	0.847276
ENSG00000094914	AAAS	-0.220479	0.361908	0.582778
ENSG00000160094	ZNF362	-1.02982	0.104049	0.274191
ENSG00000005483	KMT2E	-1.02968	0.0350908	0.137985
ENSG00000095002	MSH2	-0.38494	0.445426	0.659152
ENSG00000196230	TUBB	-1.02796	8.64394e-18	7.37721e-15
ENSG00000095059	DHPS	0.118919	0.67071	0.819553
ENSG00000259488	AC023355.1	-1.02709	0.173239	0.373388
ENSG00000226763	SRRM5	-1.0266	0.109028	0.282049
ENSG00000100697	DICER1	-1.02598	0.0118415	0.0667275
ENSG00000095303	PTGS1	0.0370399	0.925739	0.964256
ENSG00000162437	RAVER2	-1.02475	0.00203804	0.0187579
ENSG00000095321	CRAT	0.109389	0.712851	0.846981
ENSG00000146281	PM20D2	-1.02439	0.00021684	0.00348577
ENSG00000095380	NANS	-0.00945704	0.975728	0.98687
ENSG00000095383	TBC1D2	0.0066237	0.985507	0.991421
ENSG00000095485	CWF19L1	0.291607	0.395282	0.61295
ENSG00000160392	C19orf47	-1.0239	0.0645164	0.202772
ENSG00000095574	IKZF5	-0.0502326	0.904166	0.952959
ENSG00000167280	ENGASE	-1.02345	0.0179675	0.0894374
ENSG00000064999	ANKS1A	-1.02338	0.00153176	0.0150736
ENSG00000140992	PDPK1	-1.02277	0.115737	0.292948
ENSG00000187231	SESTD1	-1.02253	0.0402353	0.151092
ENSG00000096063	SRPK1	-0.346817	0.28851	0.509936
ENSG00000165071	TMEM71	-1.02196	0.223087	0.43778
ENSG00000069956	MAPK6	-1.02191	0.189276	0.395311
ENSG00000121644	DESI2	-1.02181	0.00376154	0.0297766
ENSG00000122483	CCDC18	-1.02175	0.0864042	0.244051
ENSG00000136824	SMC2	-1.02167	0.00663068	0.0448802
ENSG00000185090	MANEAL	-1.0213	0.135078	0.321342
ENSG00000097033	SH3GLB1	-0.00394788	0.98478	0.991008
ENSG00000261416	AC012645.3	-1.02075	0.00100045	0.0109212
ENSG00000072274	TFRC	-1.02072	0.00302349	0.0252083
ENSG00000136870	ZNF189	-1.02068	0.203782	0.413556
ENSG00000131375	CAPN7	-1.02054	0.0399881	0.150589
ENSG00000099246	RAB18	-0.291363	0.42473	0.638489
ENSG00000152818	UTRN	-1.01757	0.184048	0.388629
ENSG00000099284	H2AFY2	-0.499859	0.399758	0.617488
ENSG00000099290	WASHC2A	-0.038846	0.879531	0.940008
ENSG00000099308	MAST3	0.111961	0.816406	0.907999
ENSG00000118655	DCLRE1B	-1.01754	0.0727202	0.219305
ENSG00000099330	OCEL1	0.13142	0.734294	0.860941
ENSG00000178691	SUZ12	-1.01687	5.90482e-05	0.00127435
ENSG00000099337	KCNK6	0.503347	0.292156	0.513059
ENSG00000121057	AKAP1	-1.01658	0.0387305	0.146884
ENSG00000183530	PRR14L	-1.01615	0.00785709	0.0502367
ENSG00000099377	HSD3B7	0.0757888	0.911825	0.956997
ENSG00000139219	COL2A1	-1.01571	0.105463	0.276559
ENSG00000272269	AL138724.1	-1.01535	0.152243	0.346882
ENSG00000078596	ITM2A	-1.01403	0.01878	0.0916189
ENSG00000107290	SETX	-1.01347	0.000540227	0.00692849
ENSG00000134215	VAV3	-1.01317	0.19145	0.398432
ENSG00000137776	SLTM	-1.01251	0.000539859	0.00692849
ENSG00000099785	MARCH2	0.235502	0.522793	0.718055
ENSG00000182158	CREB3L2	-1.01209	0.0120412	0.0674588
ENSG00000130695	CEP85	-1.01189	0.00422753	0.032372
ENSG00000173928	SWSAP1	-1.01116	0.224017	0.438505
ENSG00000156232	WHAMM	-1.01021	0.0371439	0.143148
ENSG00000099810	MTAP	-0.418572	0.399776	0.617488
ENSG00000068366	ACSL4	-1.00993	0.0103498	0.0606137
ENSG00000119778	ATAD2B	-1.00846	0.0394858	0.149146
ENSG00000143702	CEP170	-1.00837	0.0134662	0.0732724
ENSG00000099860	GADD45B	0.0622969	0.861083	0.929752
ENSG00000158711	ELK4	-1.0082	0.011841	0.0667275
ENSG00000038358	EDC4	-1.00794	0.0356205	0.139137
ENSG00000123983	ACSL3	-1.00756	0.153838	0.348555
ENSG00000099899	TRMT2A	0.201715	0.281181	0.502149
ENSG00000101856	PGRMC1	-1.0063	0.236252	0.452069
ENSG00000099904	ZDHHC8	-0.237594	0.402362	0.619343
ENSG00000099910	KLHL22	-0.281642	0.514859	0.711429
ENSG00000099917	MED15	0.203826	0.293789	0.514312
ENSG00000099940	SNAP29	-0.146609	0.478915	0.685687
ENSG00000167670	CHAF1A	-1.0058	0.000149937	0.00262629
ENSG00000099949	LZTR1	0.224548	0.43426	0.647588
ENSG00000115415	STAT1	-1.00564	0.00120877	0.0127219
ENSG00000099958	DERL3	0.422045	0.610575	0.78083
ENSG00000173226	IQCB1	-1.00496	0.0418875	0.155138
ENSG00000099974	DDTL	0.147013	0.511808	0.70891
ENSG00000099977	DDT	0.153388	0.525846	0.72045
ENSG00000166848	TERF2IP	-1.00471	0.047998	0.169576
ENSG00000024048	UBR2	-1.00441	0.00865807	0.0537935
ENSG00000099998	GGT5	0.0553737	0.876277	0.938561
ENSG00000004700	RECQL	-1.00431	0.0265052	0.114254
ENSG00000138246	DNAJC13	-1.00317	0.0145048	0.0771945
ENSG00000100023	PPIL2	0.0596962	0.81871	0.909592
ENSG00000100027	YPEL1	0.0594093	0.868739	0.934753
ENSG00000100028	SNRPD3	-0.203262	0.297661	0.518452
ENSG00000133657	ATP13A3	-1.00303	0.0733216	0.220481
ENSG00000100030	MAPK1	-0.274302	0.309828	0.531347
ENSG00000224470	ATXN1L	-1.00289	0.254179	0.473534
ENSG00000169032	MAP2K1	-1.0025	0.0115726	0.0658443
ENSG00000100034	PPM1F	0.153862	0.53376	0.727911
ENSG00000151292	CSNK1G3	-1.00229	0.187925	0.393715
ENSG00000168374	ARF4	-1.00223	0.00696984	0.0466711
ENSG00000054967	RELT	-1.00169	0.000122642	0.00226201
ENSG00000100058	CRYBB2P1	0.437233	0.341456	0.563932
ENSG00000100060	MFNG	0.104695	0.694217	0.835552
ENSG00000100068	LRP5L	0.0144781	0.972311	0.985326
ENSG00000100075	SLC25A1	-0.0998067	0.633956	0.796343
ENSG00000100077	GRK3	-0.166623	0.766935	0.879442
ENSG00000008869	HEATR5B	-0.998269	0.0196923	0.0942259
ENSG00000119185	ITGB1BP1	-0.997534	0.00443766	0.0335433
ENSG00000166579	NDEL1	-0.997345	0.0998677	0.267024
ENSG00000126216	TUBGCP3	-0.997259	0.0112044	0.0644133
ENSG00000100099	HPS4	0.034851	0.882275	0.941227
ENSG00000100100	PIK3IP1	-0.106849	0.857472	0.927627
ENSG00000159147	DONSON	-0.996207	0.0287633	0.120927
ENSG00000171045	TSNARE1	-0.995874	0.17648	0.37835
ENSG00000100106	TRIOBP	-0.111932	0.650871	0.807066
ENSG00000100109	TFIP11	0.225061	0.434246	0.647588
ENSG00000126226	PCID2	-0.995546	0.0247473	0.109692
ENSG00000100122	CRYBB1	-0.0216909	0.975019	0.986753
ENSG00000160767	FAM189B	-0.995135	0.0228426	0.103999
ENSG00000173950	XXYLT1	-0.994613	0.0437867	0.159688
ENSG00000145604	SKP2	-0.994252	0.188774	0.394438
ENSG00000100139	MICALL1	-0.0732853	0.718196	0.850458
ENSG00000100150	DEPDC5	-0.268911	0.762184	0.876039
ENSG00000197312	DDI2	-0.993949	0.212791	0.424928
ENSG00000100154	TTC28	-0.0673092	0.908203	0.954961
ENSG00000073111	MCM2	-0.993283	5.6171e-05	0.00122615
ENSG00000278540	ACACA	-0.993076	0.019796	0.0945532
ENSG00000149257	SERPINH1	-0.991986	0.0381012	0.145737
ENSG00000100209	HSCB	-0.388737	0.484493	0.690619
ENSG00000100211	CBY1	-0.373442	0.312698	0.53511
ENSG00000188785	ZNF548	-0.991873	0.152892	0.347533
ENSG00000111358	GTF2H3	-0.991383	0.14834	0.340742
ENSG00000171617	ENC1	-0.990467	0.0410497	0.15309
ENSG00000100221	JOSD1	-0.167424	0.534653	0.728388
ENSG00000100225	FBXO7	-0.026453	0.907533	0.954826
ENSG00000100226	GTPBP1	0.0570098	0.796728	0.89663
ENSG00000100227	POLDIP3	-0.244777	0.280632	0.501718
ENSG00000100234	TIMP3	-0.591988	0.341246	0.563819
ENSG00000100239	PPP6R2	0.0377758	0.850811	0.924031
ENSG00000153885	KCTD15	-0.989828	0.188594	0.394339
ENSG00000126746	ZNF384	-0.989364	1.88235e-05	0.000515774
ENSG00000258232	AC125611.3	-0.989142	7.79676e-05	0.0015775
ENSG00000100246	DNAL4	-0.3718	0.624649	0.789923
ENSG00000106028	SSBP1	-0.988893	0.15723	0.352803
ENSG00000110344	UBE4A	-0.987945	0.00852864	0.053236
ENSG00000152926	ZNF117	-0.987838	0.267086	0.488297
ENSG00000100271	TTLL1	-0.829887	0.296542	0.517076
ENSG00000100280	AP1B1	0.114319	0.573435	0.755566
ENSG00000184575	XPOT	-0.987277	0.00410541	0.0316963
ENSG00000205189	ZBTB10	-0.986624	0.197488	0.405894
ENSG00000100290	BIK	-0.676243	0.387826	0.605351
ENSG00000100292	HMOX1	0.498504	0.337798	0.560291
ENSG00000196470	SIAH1	-0.985467	0.0393353	0.148843
ENSG00000073331	ALPK1	-0.985425	0.121185	0.301452
ENSG00000169403	PTAFR	-0.985373	0.030854	0.127096
ENSG00000102580	DNAJC3	-0.984462	0.00516836	0.0375837
ENSG00000100299	ARSA	-0.034478	0.965229	0.981433
ENSG00000100300	TSPO	0.0684657	0.71578	0.848452
ENSG00000231955	AC007383.3	-0.98441	0.152485	0.347049
ENSG00000100314	CABP7	0.416387	0.40034	0.618055
ENSG00000196850	PPTC7	-0.983201	0.0174133	0.087491
ENSG00000094916	CBX5	-0.983155	0.000330722	0.00477735
ENSG00000087448	KLHL42	-0.982859	0.0234593	0.106001
ENSG00000062725	APPBP2	-0.982077	0.163703	0.362071
ENSG00000156976	EIF4A2	-0.981797	1.1861e-05	0.000366264
ENSG00000100330	MTMR3	-0.0509398	0.888909	0.945073
ENSG00000204469	PRRC2A	-0.981289	3.43485e-09	4.96098e-07
ENSG00000154945	ANKRD40	-0.980819	0.00946358	0.0569148
ENSG00000182481	KPNA2	-0.980223	0.00733301	0.048125
ENSG00000156983	BRPF1	-0.979763	0.0120231	0.0674268
ENSG00000113441	LNPEP	-0.979659	0.00462201	0.0345749
ENSG00000205765	C5orf51	-0.979615	0.177672	0.380038
ENSG00000100889	PCK2	-0.978584	0.00904898	0.0553432
ENSG00000112763	BTN2A1	-0.978569	0.0992619	0.265945
ENSG00000154222	CC2D1B	-0.978216	0.000882878	0.0099263
ENSG00000174197	MGA	-0.976872	0.00725794	0.047883
ENSG00000188486	H2AFX	-0.976487	0.000345728	0.00493267
ENSG00000100372	SLC25A17	0.101521	0.846404	0.922242
ENSG00000100376	FAM118A	-0.359829	0.357503	0.578662
ENSG00000006634	DBF4	-0.975849	0.211975	0.423972
ENSG00000100380	ST13	0.13552	0.528676	0.722763
ENSG00000123104	ITPR2	-0.975797	0.00879047	0.0542925
ENSG00000120137	PANK3	-0.973443	0.0320776	0.130205
ENSG00000100395	L3MBTL2	0.100871	0.716537	0.849028
ENSG00000100401	RANGAP1	0.0261957	0.908096	0.954961
ENSG00000117155	SSX2IP	-0.972841	0.0351403	0.138001
ENSG00000196460	RFX8	-0.972177	0.106078	0.277476
ENSG00000066135	KDM4A	-0.972111	0.003957	0.0308541
ENSG00000198677	TTC37	-0.970795	0.141643	0.330864
ENSG00000127980	PEX1	-0.970721	0.260327	0.47996
ENSG00000100417	PMM1	0.126313	0.846039	0.922084
ENSG00000182934	SRPRA	-0.970694	0.00453512	0.0341425
ENSG00000264538	SUZ12P1	-0.96939	0.0128468	0.0707461
ENSG00000116199	FAM20B	-0.969388	0.0104517	0.0610584
ENSG00000128654	MTX2	-0.969254	0.0258889	0.11273
ENSG00000100427	MLC1	-0.221893	0.436648	0.650013
ENSG00000083642	PDS5B	-0.96894	0.0164829	0.0846507
ENSG00000100441	KHNYN	-0.0841197	0.641173	0.800444
ENSG00000162298	SYVN1	-0.968673	0.203694	0.413555
ENSG00000100445	SDR39U1	-0.0536879	0.809738	0.90401
ENSG00000100448	CTSG	0.107896	0.737591	0.862083
ENSG00000100461	RBM23	-0.143609	0.596342	0.771955
ENSG00000010803	SCMH1	-0.966975	0.0309806	0.127321
ENSG00000184992	BRI3BP	-0.966843	0.00613578	0.0424499
ENSG00000100485	SOS2	-0.10425	0.854424	0.926037
ENSG00000134884	ARGLU1	-0.966709	0.00179494	0.017068
ENSG00000167900	TK1	-0.965123	0.00078505	0.00912134
ENSG00000115568	ZNF142	-0.964847	0.214754	0.427594
ENSG00000100522	GNPNAT1	0.243841	0.771169	0.881926
ENSG00000100526	CDKN3	-0.615289	0.388745	0.605934
ENSG00000100528	CNIH1	0.155675	0.629791	0.793195
ENSG00000100554	ATP6V1D	0.123649	0.73699	0.861892
ENSG00000259865	AL390728.6	-0.963552	0.0454465	0.163782
ENSG00000100567	PSMA3	0.0910862	0.855979	0.926853
ENSG00000100568	VTI1B	0.0548898	0.813926	0.906529
ENSG00000141179	PCTP	-0.962832	0.0339965	0.135385
ENSG00000100577	GSTZ1	0.198116	0.405266	0.622486
ENSG00000100580	TMED8	-0.240363	0.372355	0.591627
ENSG00000015133	CCDC88C	-0.962232	0.0999206	0.267024
ENSG00000064115	TM7SF3	-0.961057	0.0387239	0.146884
ENSG00000198925	ATG9A	-0.959932	0.00330593	0.026941
ENSG00000100601	ALKBH1	0.377058	0.443912	0.657994
ENSG00000267633	AC008686.1	-0.959346	0.0466311	0.16639
ENSG00000100605	ITPK1	0.137086	0.51711	0.713286
ENSG00000100612	DHRS7	0.344636	0.305516	0.526466
ENSG00000100614	PPM1A	-0.380721	0.401724	0.61909
ENSG00000100632	ERH	-0.175071	0.554266	0.741625
ENSG00000100644	HIF1A	0.12051	0.701164	0.839427
ENSG00000242086	LINC00969	-0.95863	0.0728895	0.219534
ENSG00000272540	AL662797.1	-0.958417	0.000508637	0.00663975
ENSG00000162337	LRP5	-0.957931	0.0319055	0.129666
ENSG00000118495	PLAGL1	-0.957679	0.0120487	0.0674588
ENSG00000100714	MTHFD1	-0.335958	0.427222	0.641003
ENSG00000171960	PPIH	-0.957235	0.0256624	0.112212
ENSG00000100726	TELO2	0.282832	0.367627	0.587494
ENSG00000164754	RAD21	-0.955556	0.00110535	0.0117921
ENSG00000163399	ATP1A1	-0.95479	0.00242312	0.0213599
ENSG00000100749	VRK1	-0.0790811	0.797987	0.896972
ENSG00000116095	PLEKHA3	-0.953927	0.0624995	0.198855
ENSG00000147140	NONO	-0.953496	4.26253e-08	3.9232e-06
ENSG00000100802	C14orf93	0.128781	0.786467	0.890204
ENSG00000100804	PSMB5	0.099077	0.700161	0.839127
ENSG00000170653	ATF7	-0.952833	0.0313689	0.128319
ENSG00000100813	ACIN1	-0.192286	0.301467	0.521979
ENSG00000100814	CCNB1IP1	0.202909	0.371646	0.590957
ENSG00000163131	CTSS	-0.95108	0.00368701	0.0293585
ENSG00000181904	C5orf24	-0.948537	0.0400144	0.150623
ENSG00000100836	PABPN1	0.0287933	0.889504	0.945073
ENSG00000120280	CXorf21	-0.947621	0.185587	0.390386
ENSG00000141582	CBX4	-0.947139	0.0859622	0.243296
ENSG00000196814	MVB12B	-0.946877	0.250045	0.468829
ENSG00000225733	FGD5-AS1	-0.946652	0.0141899	0.0761167
ENSG00000100897	DCAF11	-0.0128835	0.964981	0.981287
ENSG00000166949	SMAD3	-0.946577	0.241757	0.458786
ENSG00000163872	YEATS2	-0.945226	0.00957818	0.0574201
ENSG00000167553	TUBA1C	-0.944173	9.89022e-08	7.73745e-06
ENSG00000100918	REC8	-0.00779111	0.990893	0.994707
ENSG00000142611	PRDM16	-0.94416	0.114439	0.291231
ENSG00000100938	GMPR2	-0.211391	0.338272	0.560582
ENSG00000223960	AC009948.1	-0.944124	0.0644564	0.202715
ENSG00000100949	RABGGTA	0.137848	0.697817	0.837952
ENSG00000169105	CHST14	-0.943648	0.0161947	0.0835823
ENSG00000267680	ZNF224	-0.942914	0.0946167	0.257734
ENSG00000169375	SIN3A	-0.942877	0.000337764	0.00484852
ENSG00000005810	MYCBP2	-0.942411	0.0217407	0.100692
ENSG00000100994	PYGB	0.00494265	0.987027	0.992099
ENSG00000100997	ABHD12	0.223369	0.300976	0.521431
ENSG00000188997	KCTD21	-0.941975	0.0842033	0.240566
ENSG00000101019	UQCC1	-0.183282	0.656745	0.811047
ENSG00000101040	ZMYND8	0.221613	0.370978	0.590495
ENSG00000101052	IFT52	0.101053	0.854677	0.926097
ENSG00000101057	MYBL2	-0.219047	0.531784	0.725954
ENSG00000101079	NDRG3	0.110161	0.628704	0.792677
ENSG00000101082	SLA2	0.107941	0.659323	0.81195
ENSG00000101084	C20orf24	-0.592577	0.387638	0.605212
ENSG00000101096	NFATC2	-0.644938	0.344192	0.566394
ENSG00000101109	STK4	-0.219412	0.504561	0.70531
ENSG00000152700	SAR1B	-0.940898	0.123921	0.30599
ENSG00000165655	ZNF503	-0.940806	0.239679	0.456134
ENSG00000101138	CSTF1	-0.195654	0.462588	0.671528
ENSG00000101146	RAE1	0.0179318	0.964213	0.981037
ENSG00000123684	LPGAT1	-0.939811	0.00544017	0.0390461
ENSG00000068697	LAPTM4A	-0.939432	0.0260776	0.112975
ENSG00000101158	NELFCD	-0.140883	0.518889	0.715319
ENSG00000249115	HAUS5	-0.939167	0.00980994	0.0582516
ENSG00000112234	FBXL4	-0.938887	0.0547364	0.184115
ENSG00000135776	ABCB10	-0.938402	0.181055	0.384036
ENSG00000101181	MTG2	0.163893	0.620655	0.787499
ENSG00000140995	DEF8	-0.936422	0.00882645	0.0543362
ENSG00000160712	IL6R	-0.936284	0.000355432	0.00503288
ENSG00000101189	MRGBP	-0.0732265	0.748142	0.868178
ENSG00000129667	RHBDF2	-0.936266	0.164346	0.363031
ENSG00000101187	SLCO4A1	-0.935989	0.0432978	0.15854
ENSG00000127914	AKAP9	-0.935172	0.0102268	0.0601182
ENSG00000005187	ACSM3	-0.934162	0.00755033	0.0491557
ENSG00000122691	TWIST1	-0.93405	0.237062	0.452897
ENSG00000128059	PPAT	-0.933842	0.00653271	0.0444586
ENSG00000182141	ZNF708	-0.93378	0.245858	0.464036
ENSG00000101220	C20orf27	0.0741494	0.84597	0.922084
ENSG00000106780	MEGF9	-0.933256	0.215693	0.428284
ENSG00000152642	GPD1L	-0.932253	0.21775	0.430546
ENSG00000072310	SREBF1	-0.932083	0.00380163	0.0299914
ENSG00000101255	TRIB3	-0.150685	0.731772	0.859936
ENSG00000114209	PDCD10	-0.930865	0.0625074	0.198855
ENSG00000138744	NAAA	-0.929335	0.132375	0.317686
ENSG00000276234	TADA2A	-0.929154	0.00911565	0.0556061
ENSG00000161021	MAML1	-0.92903	0.0144605	0.0771704
ENSG00000101310	SEC23B	-0.261812	0.363939	0.584644
ENSG00000101336	HCK	-0.0554652	0.893153	0.947937
ENSG00000101337	TM9SF4	-0.217151	0.521975	0.71737
ENSG00000139531	SUOX	-0.928811	0.230802	0.445953
ENSG00000001167	NFYA	-0.928678	0.0475038	0.168735
ENSG00000126453	BCL2L12	-0.928615	0.00653994	0.0444586
ENSG00000262967	AC005921.2	-0.928216	0.104221	0.274531
ENSG00000159131	GART	-0.926564	0.0118817	0.0668736
ENSG00000173575	CHD2	-0.926435	0.0141969	0.0761167
ENSG00000081019	RSBN1	-0.926418	0.266758	0.487792
ENSG00000101367	MAPRE1	0.0785421	0.733843	0.860739
ENSG00000172375	C2CD2L	-0.926196	0.0700445	0.214125
ENSG00000125304	TM9SF2	-0.926013	0.00845957	0.0529456
ENSG00000101407	TTI1	-0.047863	0.897877	0.949884
ENSG00000106868	SUSD1	-0.925521	0.0402949	0.151134
ENSG00000257093	KIAA1147	-0.923789	0.162099	0.359846
ENSG00000101417	PXMP4	0.411338	0.375845	0.594033
ENSG00000246859	STARD4-AS1	-0.923618	0.000206146	0.0033599
ENSG00000165282	PIGO	-0.92327	0.070184	0.214412
ENSG00000101442	ACTR5	0.194698	0.792964	0.894323
ENSG00000164111	ANXA5	-0.923097	0.0825992	0.2377
ENSG00000101445	PPP1R16B	0.350139	0.441485	0.655508
ENSG00000101457	DNTTIP1	-0.0358022	0.923664	0.96327
ENSG00000197471	SPN	-0.922374	1.13142e-05	0.000360558
ENSG00000221829	FANCG	-0.922296	0.0852797	0.241802
ENSG00000119707	RBM25	-0.921917	0.00241938	0.0213469
ENSG00000266341	AC004477.2	-0.92151	0.0205299	0.0969653
ENSG00000073417	PDE8A	-0.921218	0.11162	0.286386
ENSG00000101546	RBFA	0.83939	0.298877	0.519699
ENSG00000072803	FBXW11	-0.920375	0.0299747	0.12457
ENSG00000101558	VAPA	-0.15695	0.458254	0.667301
ENSG00000101577	LPIN2	-0.0782892	0.839356	0.91917
ENSG00000113161	HMGCR	-0.92003	0.0220015	0.101449
ENSG00000101608	MYL12A	-0.19082	0.288536	0.509936
ENSG00000225855	RUSC1-AS1	-0.919855	0.0117906	0.0666006
ENSG00000101654	RNMT	-0.266765	0.457198	0.666487
ENSG00000101695	RNF125	-0.235635	0.607027	0.778521
ENSG00000101745	ANKRD12	-0.21682	0.526792	0.720817
ENSG00000160753	RUSC1	-0.919612	0.00338707	0.0274119
ENSG00000093009	CDC45	-0.919455	0.00835493	0.0525946
ENSG00000101782	RIOK3	0.0308635	0.903258	0.952357
ENSG00000101843	PSMD10	0.331976	0.33677	0.559896
ENSG00000007545	CRAMP1	-0.919167	0.0631957	0.200094
ENSG00000112078	KCTD20	-0.918358	0.00221385	0.0199131
ENSG00000166900	STX3	-0.917964	0.0722765	0.218388
ENSG00000101882	NKAP	0.444472	0.707625	0.843156
ENSG00000255443	CD44-AS1	-0.917554	0.00607982	0.0422483
ENSG00000101901	ALG13	-0.054533	0.917864	0.960313
ENSG00000060642	PIGV	-0.917357	0.149801	0.343009
ENSG00000090372	STRN4	-0.917095	0.0016116	0.0157273
ENSG00000196083	IL1RAP	-0.917081	0.0503694	0.175657
ENSG00000268001	CARD8-AS1	-0.915989	0.154991	0.350194
ENSG00000101972	STAG2	-0.126664	0.582377	0.762281
ENSG00000159921	GNE	-0.915845	0.0840611	0.240379
ENSG00000101997	CCDC22	0.0665418	0.862124	0.930268
ENSG00000148700	ADD3	-0.915068	0.015406	0.0807097
ENSG00000177426	TGIF1	-0.91483	0.00417651	0.032165
ENSG00000143382	ADAMTSL4	-0.914483	0.00116577	0.0123385
ENSG00000106144	CASP2	-0.914338	0.00139694	0.0142393
ENSG00000107581	EIF3A	-0.91387	2.74549e-06	0.000120442
ENSG00000102081	FMR1	-0.537345	0.281242	0.502149
ENSG00000102096	PIM2	0.0606978	0.781587	0.887248
ENSG00000102100	SLC35A2	0.0293356	0.946199	0.972404
ENSG00000101126	ADNP	-0.913388	0.0229595	0.10413
ENSG00000134250	NOTCH2	-0.913165	0.0223616	0.102384
ENSG00000102125	TAZ	0.173866	0.462188	0.671257
ENSG00000136159	NUDT15	-0.911885	0.195265	0.403172
ENSG00000131943	C19orf12	-0.91172	0.0885548	0.248166
ENSG00000102172	SMS	-0.138454	0.505374	0.705677
ENSG00000095209	TMEM38B	-0.911316	0.211315	0.422901
ENSG00000102181	CD99L2	-0.240638	0.37904	0.596918
ENSG00000048991	R3HDM1	-0.909092	0.0429283	0.157796
ENSG00000012660	ELOVL5	-0.90869	0.0438003	0.159688
ENSG00000102225	CDK16	-0.0454133	0.839185	0.91917
ENSG00000102226	USP11	0.172159	0.595571	0.771842
ENSG00000259291	ZNF710-AS1	-0.908326	0.0257306	0.112355
ENSG00000164024	METAP1	-0.90811	0.0171377	0.0867323
ENSG00000141560	FN3KRP	-0.907739	0.0529087	0.180227
ENSG00000102316	MAGED2	0.0335935	0.928761	0.965789
ENSG00000147535	PLPP5	-0.90717	0.256379	0.475952
ENSG00000102390	PBDC1	0.553333	0.294845	0.515168
ENSG00000174718	KIAA1551	-0.906572	0.0723433	0.218501
ENSG00000068903	SIRT2	-0.905861	0.163165	0.361101
ENSG00000102409	BEX4	-0.550654	0.372364	0.591627
ENSG00000102524	TNFSF13B	0.236824	0.449374	0.66176
ENSG00000153936	HS2ST1	-0.903295	0.0218099	0.100863
ENSG00000102572	STK24	-0.340392	0.337965	0.560441
ENSG00000087903	RFX2	-0.901961	0.011949	0.0670925
ENSG00000102393	GLA	-0.901535	0.0566373	0.187857
ENSG00000164068	RNF123	-0.899807	0.00375092	0.0297658
ENSG00000136485	DCAF7	-0.899515	1.68166e-05	0.000472678
ENSG00000102710	SUPT20H	-0.274518	0.328039	0.552168
ENSG00000179523	EIF3J-AS1	-0.898848	0.169017	0.368323
ENSG00000102753	KPNA3	-0.25141	0.496082	0.698015
ENSG00000102760	RGCC	-0.614989	0.280895	0.501816
ENSG00000101966	XIAP	-0.898833	0.0195129	0.0937499
ENSG00000131462	TUBG1	-0.898782	0.0498323	0.174365
ENSG00000102804	TSC22D1	-0.330924	0.289526	0.510915
ENSG00000102805	CLN5	0.258687	0.560242	0.746066
ENSG00000074660	SCARF1	-0.898539	0.0279031	0.118501
ENSG00000064012	CASP8	-0.898459	0.0354575	0.138756
ENSG00000070444	MNT	-0.898312	0.0115082	0.0655578
ENSG00000145860	RNF145	-0.898059	0.0146662	0.0778279
ENSG00000128791	TWSG1	-0.897491	0.0172624	0.0871286
ENSG00000102890	ELMO3	-0.0414241	0.93932	0.970204
ENSG00000102893	PHKB	-0.00763064	0.978314	0.988209
ENSG00000171843	MLLT3	-0.895941	0.0811434	0.235332
ENSG00000102898	NUTF2	0.042858	0.833103	0.916703
ENSG00000102900	NUP93	-0.304535	0.384462	0.601606
ENSG00000102901	CENPT	-0.196888	0.535554	0.728876
ENSG00000102910	LONP2	-0.063978	0.814681	0.90694
ENSG00000102921	N4BP1	-0.030405	0.93461	0.96786
ENSG00000102931	ARL2BP	-0.176631	0.680022	0.826199
ENSG00000102934	PLLP	-0.0763825	0.79993	0.898322
ENSG00000102967	DHODH	0.0879578	0.889227	0.945073
ENSG00000139318	DUSP6	-0.894443	0.000746306	0.00875791
ENSG00000102977	ACD	0.314707	0.463141	0.672051
ENSG00000102978	POLR2C	0.143367	0.592311	0.770062
ENSG00000102981	PARD6A	0.259187	0.688315	0.832719
ENSG00000058063	ATP11B	-0.894167	0.116728	0.29387
ENSG00000103005	USB1	0.0140779	0.957605	0.977598
ENSG00000103018	CYB5B	-0.132116	0.587122	0.765861
ENSG00000103024	NME3	0.423228	0.348265	0.569701
ENSG00000103035	PSMD7	-0.0279634	0.895904	0.949511
ENSG00000103037	SETD6	-0.081149	0.722744	0.853796
ENSG00000103042	SLC38A7	0.000513728	0.998941	0.999154
ENSG00000103043	VAC14	0.0234927	0.920175	0.961126
ENSG00000106049	HIBADH	-0.893928	0.145888	0.337264
ENSG00000139618	BRCA2	-0.893595	0.095695	0.259543
ENSG00000188895	MSL1	-0.89279	0.0150498	0.0792415
ENSG00000151353	TMEM18	-0.892646	0.0519834	0.17837
ENSG00000103066	PLA2G15	0.207776	0.645932	0.804015
ENSG00000075151	EIF4G3	-0.892338	0.000640948	0.00782473
ENSG00000254369	HOXA-AS3	-0.89215	0.0380048	0.14556
ENSG00000135829	DHX9	-0.891505	0.000573762	0.00725941
ENSG00000158715	SLC45A3	-0.891494	0.00113709	0.0120758
ENSG00000090447	TFAP4	-0.89142	0.0223443	0.102376
ENSG00000064651	SLC12A2	-0.890579	0.104721	0.275152
ENSG00000103150	MLYCD	-0.123019	0.695289	0.835913
ENSG00000140391	TSPAN3	-0.890221	0.000898766	0.010066
ENSG00000213762	ZNF134	-0.889997	0.203896	0.413629
ENSG00000103168	TAF1C	-0.156004	0.564655	0.748875
ENSG00000171307	ZDHHC16	-0.889528	0.0386847	0.146884
ENSG00000117862	TXNDC12	-0.888818	0.00379958	0.0299914
ENSG00000103194	USP10	-0.165959	0.454894	0.664986
ENSG00000103197	TSC2	-0.0460285	0.869724	0.935062
ENSG00000103199	ZNF500	0.261393	0.506389	0.705967
ENSG00000103202	NME4	0.169479	0.533952	0.727961
ENSG00000196810	CTBP1-AS2	-0.888496	0.0216337	0.100245
ENSG00000025796	SEC63	-0.888234	0.00107345	0.011508
ENSG00000055332	EIF2AK2	-0.887458	0.024091	0.107698
ENSG00000103248	MTHFSD	0.022634	0.94571	0.972124
ENSG00000153201	RANBP2	-0.887453	0.000144543	0.0025555
ENSG00000165494	PCF11	-0.887413	0.0866886	0.244258
ENSG00000100425	BRD1	-0.887321	0.0537196	0.182131
ENSG00000151503	NCAPD3	-0.88631	0.00952907	0.0571988
ENSG00000103260	METRN	0.431548	0.294517	0.51485
ENSG00000103264	FBXO31	0.180623	0.481182	0.687675
ENSG00000087253	LPCAT2	-0.885877	0.00805838	0.0511854
ENSG00000138750	NUP54	-0.885584	0.155294	0.350516
ENSG00000103275	UBE2I	-0.10911	0.65193	0.807536
ENSG00000134186	PRPF38B	-0.884877	0.0180738	0.0897868
ENSG00000065183	WDR3	-0.884512	0.133168	0.318923
ENSG00000103335	PIEZO1	-0.178979	0.377445	0.595158
ENSG00000082898	XPO1	-0.884443	0.00096607	0.0106324
ENSG00000103351	CLUAP1	-0.410994	0.352276	0.573663
ENSG00000103353	UBFD1	-0.295514	0.41543	0.631392
ENSG00000103356	EARS2	-0.47312	0.541517	0.732961
ENSG00000115548	KDM3A	-0.884385	0.0216206	0.100234
ENSG00000134851	TMEM165	-0.884323	0.0958731	0.259757
ENSG00000103381	CPPED1	0.162403	0.500119	0.701232
ENSG00000103415	HMOX2	-0.048118	0.852751	0.925435
ENSG00000103423	DNAJA3	-0.077081	0.776603	0.884692
ENSG00000103429	BFAR	0.107893	0.646527	0.804346
ENSG00000103479	RBL2	-0.121728	0.743838	0.865419
ENSG00000086062	B4GALT1	-0.88386	0.00559685	0.0399872
ENSG00000147162	OGT	-0.883052	0.00540715	0.0388685
ENSG00000253719	ATXN7L3B	-0.882271	0.00034221	0.00489736
ENSG00000121350	PYROXD1	-0.882017	0.0133923	0.0730553
ENSG00000113621	TXNDC15	-0.881346	0.0314517	0.12849
ENSG00000103502	CDIPT	-0.0529642	0.751048	0.870044
ENSG00000103507	BCKDK	0.21371	0.415988	0.631698
ENSG00000136240	KDELR2	-0.881002	0.00287874	0.0243621
ENSG00000103512	NOMO1	0.193733	0.458822	0.668025
ENSG00000126705	AHDC1	-0.880957	0.00983698	0.0583015
ENSG00000103544	C16orf62	0.269873	0.493526	0.696323
ENSG00000244462	RBM12	-0.880522	0.00376489	0.0297766
ENSG00000103550	KNOP1	0.234083	0.345142	0.566864
ENSG00000103591	AAGAB	0.0680514	0.799684	0.898259
ENSG00000167004	PDIA3	-0.880308	0.000421347	0.00567519
ENSG00000174099	MSRB3	-0.880131	0.000807345	0.00933419
ENSG00000103657	HERC1	-0.0290902	0.93515	0.96786
ENSG00000103671	TRIP4	0.0517988	0.927967	0.965398
ENSG00000103740	ACSBG1	0.0915314	0.750989	0.870044
ENSG00000177733	HNRNPA0	-0.880117	3.94797e-06	0.000159071
ENSG00000165943	MOAP1	-0.880098	0.0624171	0.198855
ENSG00000103855	CD276	0.616727	0.551572	0.740777
ENSG00000198900	TOP1	-0.879885	0.000974429	0.0106868
ENSG00000103932	RPAP1	-0.113717	0.805805	0.901459
ENSG00000103966	EHD4	-0.435853	0.30621	0.527178
ENSG00000145050	MANF	-0.878539	0.0168651	0.0859088
ENSG00000103994	ZNF106	-0.315194	0.347058	0.568541
ENSG00000104043	ATP8B4	-0.154973	0.47037	0.677484
ENSG00000167695	FAM57A	-0.877843	0.249451	0.467996
ENSG00000272770	AC005696.2	-0.877774	0.105178	0.276043
ENSG00000104064	GABPB1	-0.073104	0.728579	0.857775
ENSG00000104081	BMF	0.0356155	0.902937	0.952125
ENSG00000198380	GFPT1	-0.87752	0.0188392	0.0917814
ENSG00000104129	DNAJC17	0.286413	0.512296	0.709251
ENSG00000104131	EIF3J	0.0130892	0.945358	0.972124
ENSG00000132405	TBC1D14	-0.877372	0.00011173	0.00210205
ENSG00000151233	GXYLT1	-0.877056	0.101045	0.269187
ENSG00000104164	BLOC1S6	-0.444616	0.333135	0.55676
ENSG00000107404	DVL1	-0.876929	0.0214927	0.0997997
ENSG00000149639	SOGA1	-0.875537	0.25601	0.47553
ENSG00000104221	BRF2	-0.214035	0.564476	0.748875
ENSG00000173914	RBM4B	-0.874858	0.249911	0.468754
ENSG00000170525	PFKFB3	-0.874547	0.00781411	0.0501771
ENSG00000104267	CA2	0.142144	0.833034	0.916703
ENSG00000133597	ADCK2	-0.874186	0.140739	0.329902
ENSG00000104312	RIPK2	-0.0975728	0.825946	0.912877
ENSG00000107854	TNKS2	-0.873617	0.133398	0.319312
ENSG00000104324	CPQ	-0.346709	0.427648	0.641354
ENSG00000092148	HECTD1	-0.869757	0.0127241	0.0703914
ENSG00000127526	SLC35E1	-0.869636	0.00712466	0.0474023
ENSG00000082258	CCNT2	-0.869242	0.0638254	0.201391
ENSG00000104343	UBE2W	-0.118248	0.790261	0.892991
ENSG00000104361	NIPAL2	0.378455	0.410538	0.627709
ENSG00000163513	TGFBR2	-0.868555	0.0732882	0.220452
ENSG00000104375	STK3	0.188267	0.747886	0.868091
ENSG00000255929	AP000943.3	-0.867617	0.0369177	0.142568
ENSG00000125843	AP5S1	-0.867228	0.243672	0.461535
ENSG00000104419	NDRG1	-0.144701	0.425165	0.63898
ENSG00000104442	ARMC1	0.182212	0.819059	0.909764
ENSG00000047315	POLR2B	-0.866794	0.0473374	0.168462
ENSG00000168286	THAP11	-0.866098	0.0103233	0.0604963
ENSG00000143870	PDIA6	-0.865861	0.000177518	0.00296537
ENSG00000033030	ZCCHC8	-0.865819	0.01616	0.0834721
ENSG00000145391	SETD7	-0.865641	0.126032	0.309491
ENSG00000047056	WDR37	-0.864582	0.0141844	0.0761167
ENSG00000121957	GPSM2	-0.863937	0.0575589	0.189545
ENSG00000138764	CCNG2	-0.863925	0.0922578	0.253473
ENSG00000104626	ERI1	-0.791412	0.287301	0.508749
ENSG00000104643	MTMR9	0.19062	0.793497	0.894495
ENSG00000150782	IL18	-0.863372	0.00376354	0.0297766
ENSG00000104671	DCTN6	-0.0444148	0.947202	0.972903
ENSG00000138413	IDH1	-0.862525	0.000389259	0.0053583
ENSG00000158470	B4GALT5	-0.861774	0.00199302	0.0184522
ENSG00000104695	PPP2CB	0.0558246	0.942986	0.971252
ENSG00000104714	ERICH1	-0.499737	0.550748	0.740218
ENSG00000175265	GOLGA8A	-0.861251	0.0980337	0.263632
ENSG00000115392	FANCL	-0.860455	0.261123	0.480954
ENSG00000104763	ASAH1	-0.0781686	0.695496	0.835913
ENSG00000104765	BNIP3L	0.218101	0.474951	0.682196
ENSG00000104774	MAN2B1	-0.138973	0.596563	0.771955
ENSG00000070047	PHRF1	-0.860351	0.00236598	0.0210539
ENSG00000182827	ACBD3	-0.860327	0.261437	0.481299
ENSG00000132510	KDM6B	-0.860006	0.00146837	0.0146183
ENSG00000229807	XIST	-0.859743	0.00270903	0.0233539
ENSG00000147889	CDKN2A	-0.859742	0.0789702	0.231607
ENSG00000104824	HNRNPL	-0.0691026	0.833821	0.917046
ENSG00000272742	AC135457.1	-0.858676	3.70862e-05	0.00086442
ENSG00000104852	SNRNP70	0.0291282	0.887758	0.944607
ENSG00000104853	CLPTM1	-0.0814581	0.750879	0.870044
ENSG00000144677	CTDSPL	-0.858434	0.135016	0.321342
[truncated: 7,657 more rows]
